# Supplementary material for: Electricity-driven, oxidative C–H selenylative and tellurylative annulation of N-(2-alkynyl)anilines: sustainable synthesis of 3-selanyl/tellanylquinolines
Source: Royal Society of Chemistry journal article supplement (doi:10.1039/d4cc01780c), 2024-01-01

## Electricity-driven, oxidative C-H selenylative and tellurylative annulation of N-(2-alkynyl)anilines: Sustainable synthesis of 3-selanyl/tellanylquinolines

Ainala Naresh,<sup>#</sup> H. Sai Keerthana,<sup>#</sup> Nilanjana Mukherjee and Tanmay Chatterjee\*

<sup>#</sup>Equal contribution

Birla Institute of Technology and Science, Pilani (BITS Pilani), Hyderabad Campus, Jawahar Nagar, Kapra Mandal, Hyderabad-500078, Telangana, India

Email: [tanmay@hyderabad.bits-pilani.ac.in](mailto:tanmay@hyderabad.bits-pilani.ac.in)

### Table of Contents

|                                                                                                                                              |     |
|----------------------------------------------------------------------------------------------------------------------------------------------|-----|
| 1. General Reagent Information.....                                                                                                          | S2  |
| 2. General Analytical Information.....                                                                                                       | S2  |
| 3. Table <i>SI</i> . Optimization of the Reaction Conditions .....                                                                           | S3  |
| 4. Synthesis of <i>N</i> -(2-Alkynyl)anilines (1a-1s), and Diaryl diselenides (2a-2l). .                                                     | S4  |
| 5. General Experimental Procedure for the Synthesis of 3-Selanylquinolines<br>(3aa-3qa and 3ab–3ak) and 3-Telanylquinolines (5aa – 5ja)..... | S6  |
| 6. <i>In-Situ</i> Detection of (2,2-Diphenylvinyl)(phenyl)selane by LC-MS.....                                                               | S9  |
| 7. Cyclic Voltammetry .....                                                                                                                  | S9  |
| 8. Calculation of Faradaic Efficiency .....                                                                                                  | S13 |
| 9. Characterization of all Synthesized Products.....                                                                                         | S30 |

## 1. General Reagent Information

All reagents and solvents were purchased from Sigma-Aldrich, TCI, Finar and other local chemical companies. Flash column chromatography was performed using silica gel (100-200 mesh)

## 2. General Analytical Information

The starting materials such as N-(3-phenylprop-2-yn-1-yl) aniline and products such as 4-phenyl-3-(phenylselanyl)quinoline and 4-phenyl-3-(phenyltellanyl)quinoline were characterized by  $^1\text{H}$  NMR,  $^{13}\text{C}$  NMR,  $^{77}\text{Se}$  NMR (for unknown compounds only) and  $^{19}\text{F}$  NMR (for unknown compounds only) spectra which were recorded on a Bruker 400 MHz instrument (400 MHz for  $^1\text{H}$  NMR, 101 MHz for  $^{13}\text{C}$  NMR, 76 MHz for  $^{77}\text{Se}$  NMR and 377 MHz for  $^{19}\text{F}$  NMR). Copies of  $^1\text{H}$ ,  $^{13}\text{C}$ ,  $^{77}\text{Se}$  and  $^{19}\text{F}$  NMR spectra can be found at the end of the Supporting Information.  $^1\text{H}$  NMR experiments are reported in units, parts per million (ppm), and were measured relative to residual chloroform (7.26 ppm) in the deuterated solvent.  $^{13}\text{C}$  NMR spectra are reported in ppm relative to deuteriochloroform (77.00 ppm) and all were obtained with  $^1\text{H}$  decoupling. Coupling constants were reported in Hz. Reactions were monitored by thin layer chromatography (TLC) and  $^1\text{H}$  NMR of the crude reaction mixture using 1,3,5-trimethylbenzene (mesitylene) as the internal standard. Mass spectral data were obtained on LC-MS-8040 (Shimadzu). Mass spectral data of unknown compounds were obtained on a high-resolution mass spectrometer, HRMS (6546 Q-TOF LC/MS, Agilent). Melting points of unknown compounds were recorded on a KRUSS Optronic M3000 apparatus. Cyclic Voltammetry and all the chronopotentiometry (CCE) experiments were conducted on a AUTOLAB potentiostat/galvanostat.

### 3. Table S1. Optimization of the Reaction Conditions<sup>a</sup>

| entry    | variation from the standard conditions                                       | yield (%) <sup>b</sup> |
|----------|------------------------------------------------------------------------------|------------------------|
| <b>1</b> | <b>none</b>                                                                  | <b>92</b>              |
| 2        | Pt as cathode instead of C <sub>gr</sub>                                     | 90                     |
| 3        | C <sub>gr</sub> as anode instead of Pt                                       | trace                  |
| 4        | C <sub>gr</sub> as anode and Pt as cathode                                   | 60                     |
| 5        | Ni-foam as anode instead of Pt                                               | 43                     |
| 6        | <sup>n</sup> Bu <sub>4</sub> NBr instead of LiClO <sub>4</sub>               | 12                     |
| 7        | Et <sub>4</sub> NBr instead of LiClO <sub>4</sub>                            | 19                     |
| 8        | <sup>n</sup> Bu <sub>4</sub> NClO <sub>4</sub> instead of LiClO <sub>4</sub> | 30                     |
| 9        | <sup>n</sup> Bu <sub>4</sub> NPF <sub>6</sub> instead of LiClO <sub>4</sub>  | 10                     |
| 10       | KI instead of LiClO <sub>4</sub>                                             | 83                     |
| 11       | EtOH instead of MeCN                                                         | 36                     |
| 12       | <sup>i</sup> PrOH instead of MeCN                                            | 65                     |
| 13       | DMF instead of MeCN                                                          | trace                  |
| 14       | H <sub>2</sub> O instead of MeCN                                             | 0                      |
| 15       | 0.6 equiv of <b>2a</b> was used instead of 0.5 equiv                         | 91                     |
| 16       | 1.0 equiv of <b>2a</b> was used instead of 0.5 equiv                         | 90                     |
| 17       | 0.5 equiv LiClO <sub>4</sub> was used instead of 0.25 equiv                  | 91                     |
| 18       | 0.125 equiv LiClO <sub>4</sub> was used instead of 0.25 equiv                | 71                     |
| 19       | reaction conducted for 2 h                                                   | 70                     |
| 20       | 10 mA instead of 5 mA                                                        | 88                     |
| 21       | 2 mA instead of 5 mA                                                         | 63                     |
| 22       | no electrolyte                                                               | 0                      |
| 23       | no electricity                                                               | 0                      |

<sup>a</sup>Reactions were conducted in a 0.1 mmol scale in an undivided cell equipped with an anode (1 x 1 cm<sup>2</sup>), cathode (1 x 1.5 cm<sup>2</sup>), and an Ag/AgCl reference electrode under constant current electrolysis, Q = 54C, 0.0005596F (Faradaic efficiency = 49.32%); <sup>b</sup>Yield was determined by the <sup>1</sup>H NMR of the crude reaction mixture using 1,3,5-trimethylbenzene as the internal standard.

#### 4. Synthesis of *N*-(2-Alkynyl)anilines (1a-1s), and Diaryl diselenides (2a-2l).

The starting materials (**1** and **2**), as shown below, were synthesized by following the literature protocols.<sup>1-5</sup>

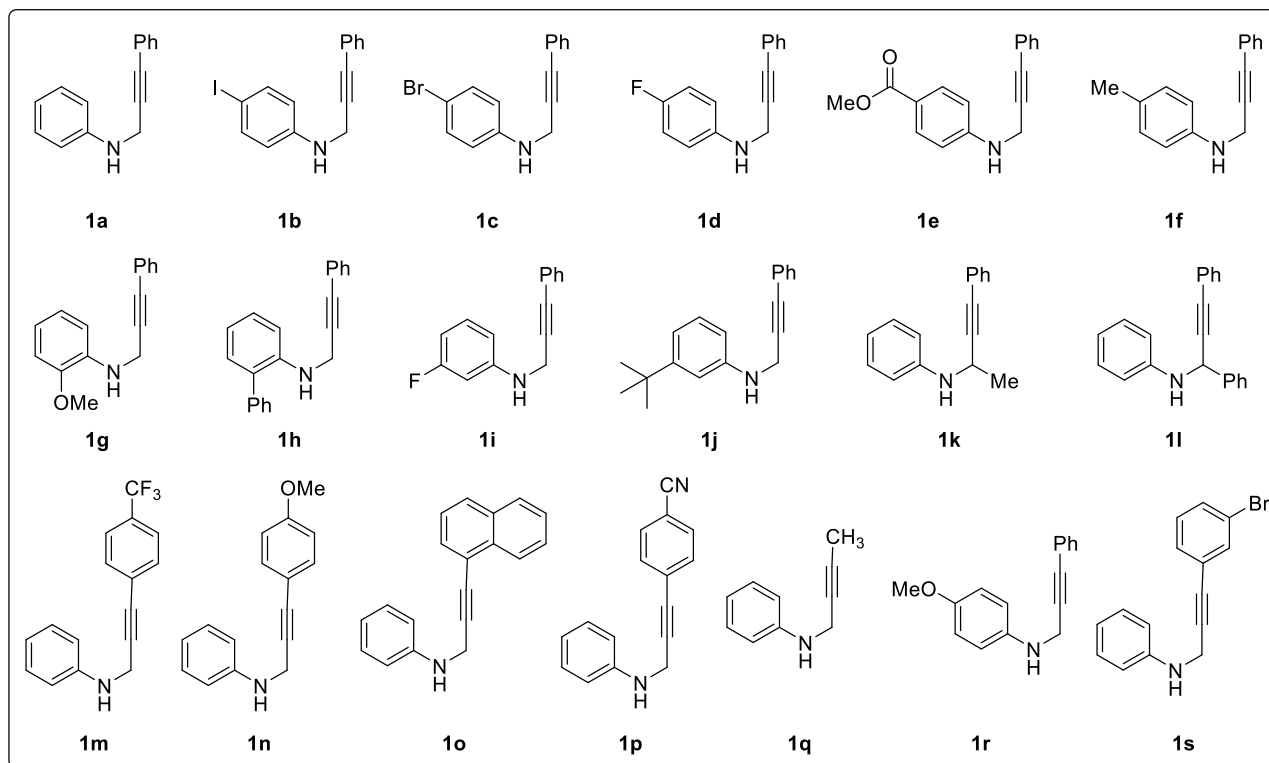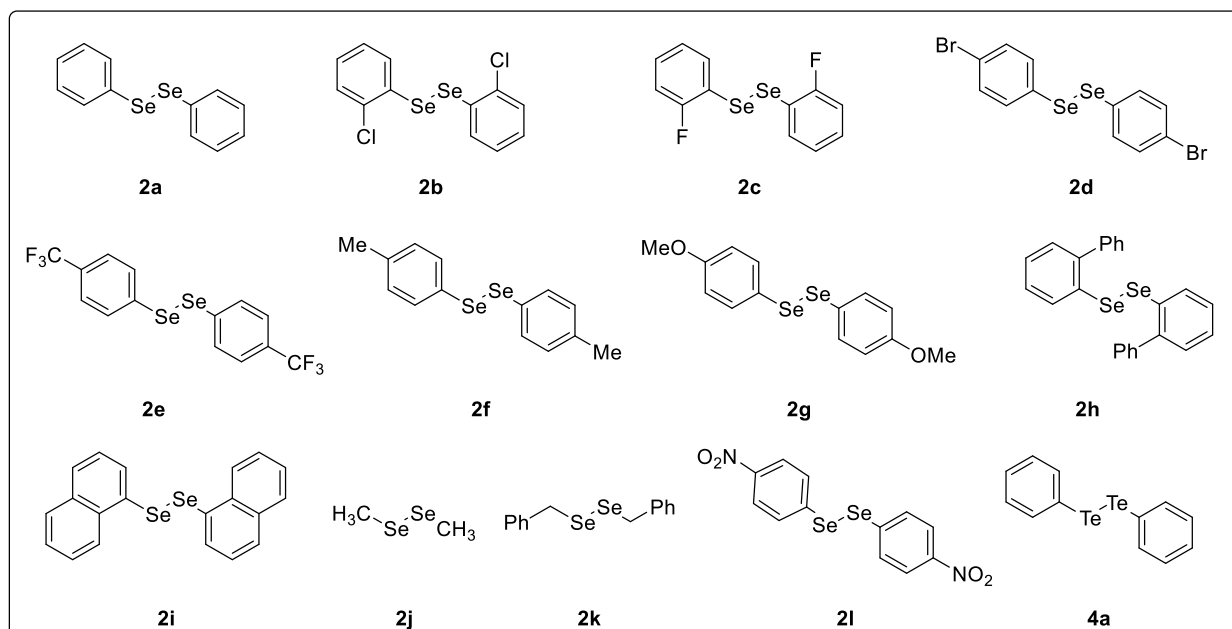



### A. General Method for the Preparation of 1a to 1j and 1r:

The starting materials **1a** to **1j** and **1r** were synthesized using the reported protocol.<sup>1</sup>

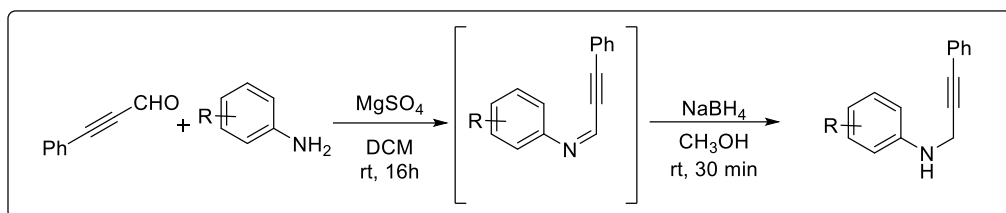

### B. General Method for the Preparation of 1k and 1l:

The starting materials **1k** and **1l** were synthesized using the reported protocol.<sup>3,4</sup>

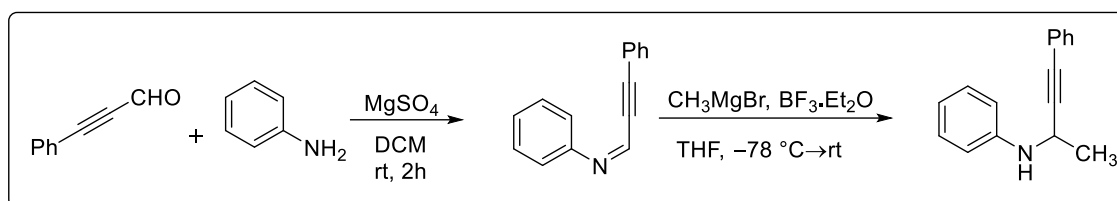

### C. General Method for the Preparation of 1m to 1p and 1s:

The starting materials **1m** to **1o**, **1q** and **1s** were synthesized using the reported protocol.<sup>1</sup>

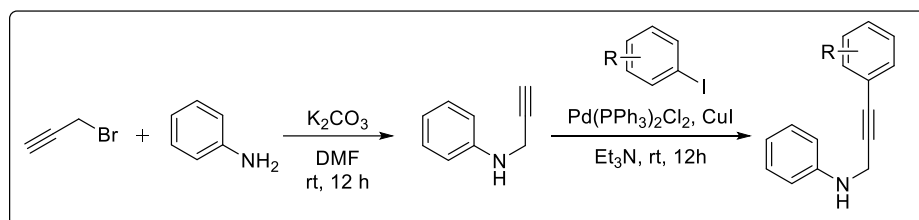

### D. Method for the Preparation of 1q:

The starting material **1q** was synthesized using the reported protocol.<sup>1</sup>

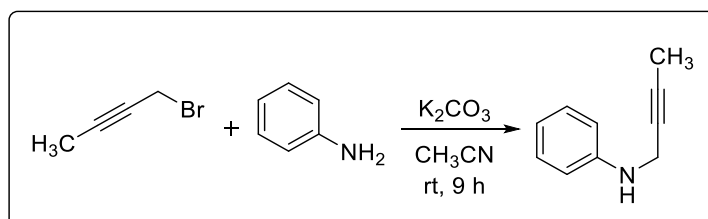

### E. General Method for the Preparation of Diaryl diselenides 2b to 2i and 2l:

The starting materials **2b** to **2i** and **2l** were synthesized using the reported protocol.<sup>5</sup> However, **2a**, **2j**, **2k** and **4a** were commercially available.

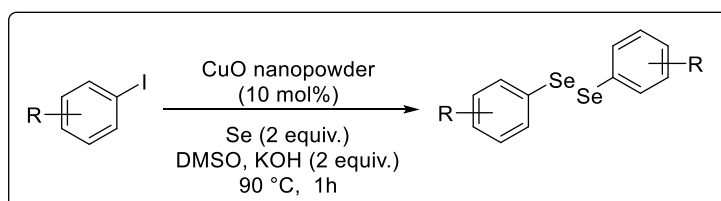

## 5. General Experimental Procedure for the Synthesis of 3-Selanylquinolines (3aa-3qa and 3ab-3ak) and 3-Telanylquinolines (5aa – 5ja)

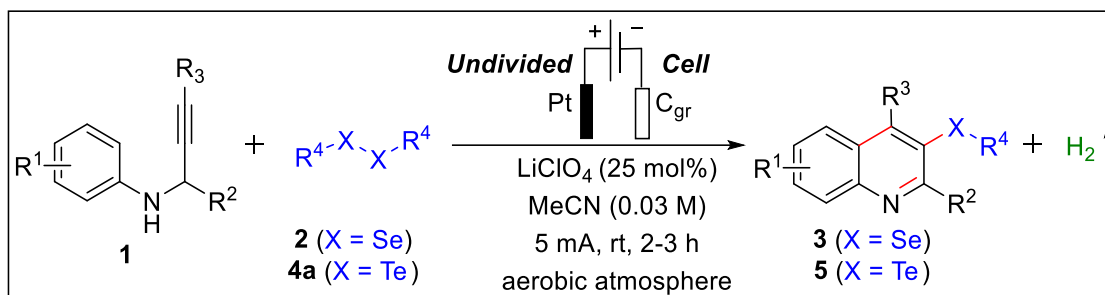

### Representative experimental procedure for the synthesis of 4-phenyl-3-(phenylselanyl)quinoline (3aa):

In an undivided electrochemical cell, *N*-(3-phenylprop-2-yn-1-yl)aniline (0.103 g, 0.5 mmol), 1,2-diphenyldiselenide (0.084 g, 0.275 mmol), lithium perchlorate (0.013 g, 0.0125 mmol) and acetonitrile (10 mL) were taken. The cell was equipped with Pt as working electrode (anode), graphite sheet as counter electrode (cathode) and Ag/AgNO<sub>3</sub> as reference electrode. The reaction mixture was subjected to a constant current of 0.005 A at room temperature in open air condition for 3 hours. The progress of the reaction was monitored using TLC. After the completion of the reaction, the reaction mixture was quenched using NaHCO<sub>3</sub> solution and extracted using ethyl acetate (2x15 mL). The organic layer was dried using anhydrous Na<sub>2</sub>SO<sub>4</sub> and was concentrated under reduced pressure. The crude product was purified using silica gel column chromatography (hexane:ethyl acetate = 95:5) to obtain the pure product, 4-phenyl-3-(phenylselanyl)quinoline (3aa) as yellow solid in 88% yield (0.171g).

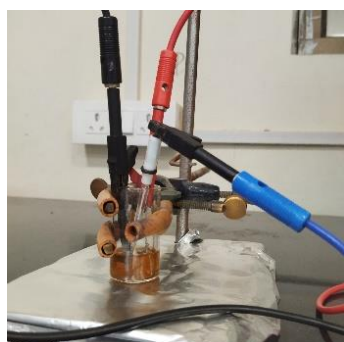

Reaction Setup

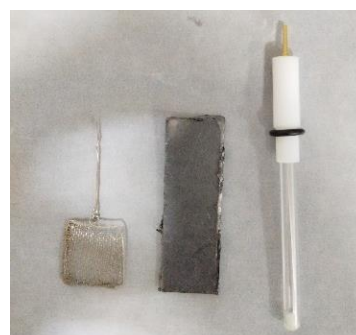

Electrodes Used

## A. Gram Scale Synthesis of 4-Phenyl-3-(phenylselanyl)quinoline (3aa):

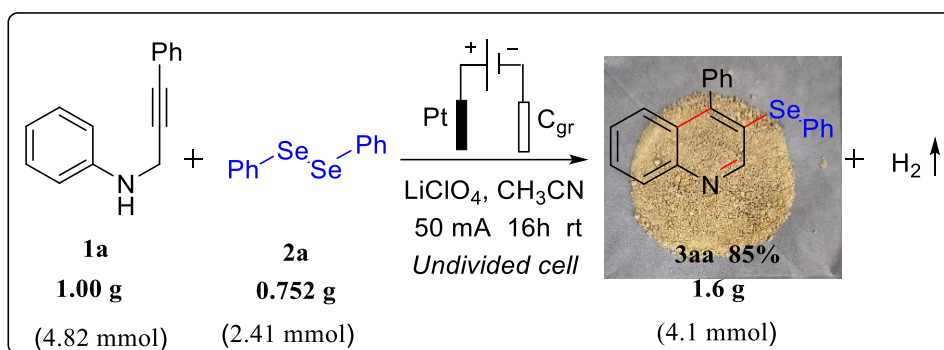

In an undivided cell, the starting material (1g, 4.82 mmol), 2a (0.752g, 2.41 mmol),  $\text{LiClO}_4$  (0.128 g, 1.205 mmol) and acetonitrile (25 mL) were taken. The cell was equipped with Pt as working electrode, graphite sheet as counter electrode and  $\text{Ag}/\text{Ag}^+$  as reference electrode. The reaction mixture was subjected to constant current of 0.06 A at room temperature in open air condition for 16 hours. The progress of the reaction was monitored using TLC. After the completion of the reaction, the reaction mixture was quenched using  $\text{NaHCO}_3$  solution and was extracted using ethyl acetate (2x15 mL). The organic layer was dried using anhydrous  $\text{Na}_2\text{SO}_4$  and was concentrated under reduced pressure. The crude product was purified using column chromatography (hexane:ethyl acetate = 95:5) to obtain the pure product.

## B. Experimental Procedures for the Synthetic Diversification of 3aa

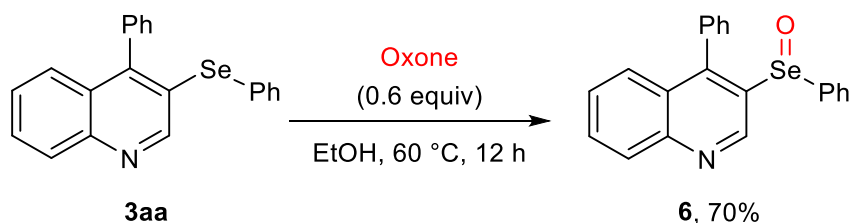

To the starting material **3aa** (0.100 g, 0.28 mmol) dissolved in ethanol (2 mL), oxone (0.103 g, 0.168 mmol) was added and the reaction mixture was heated at 60 °C for 12 hours and the reaction was monitored using TLC. After the completion of the reaction, the reaction mixture was filtered and concentrated under reduced pressure. The crude product was purified using column chromatography (DCM:Methanol = 95:5) and the pure product was characterized using spectroscopic techniques.

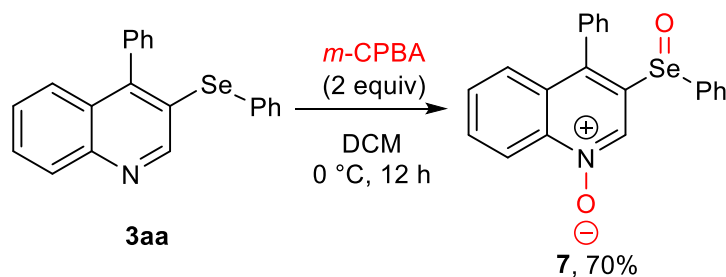

To the starting material, **3aa** (0.200 g, 0.55 mmol) dissolved in DCM (4 mL), *m*-CPBA (0.190 g, 1.1 mmol) was added at 0 °C, and the reaction mixture was allowed to stir at room temperature overnight and the progress of the reaction was monitored using TLC. After the completion of the reaction, it was quenched using sodium bicarbonate solution and was extracted using DCM (2 x 15 mL). The organic layer was concentrated under reduced pressure, and the crude was purified using silica gel column chromatography (DCM:Methanol = 90:10).

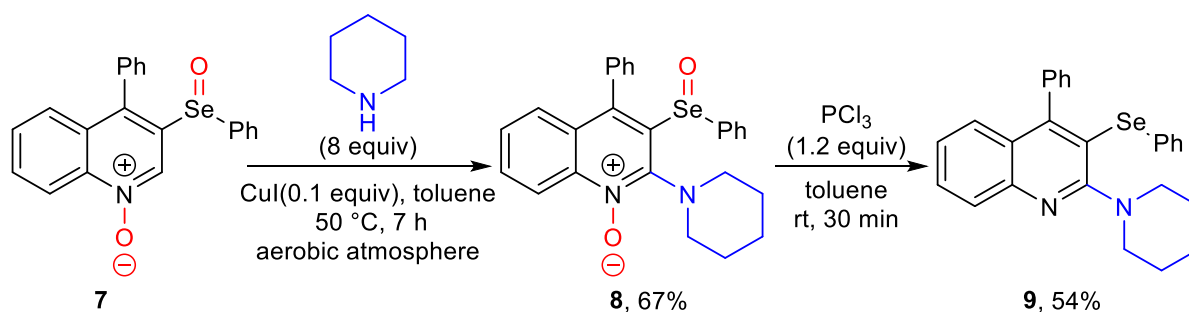

The compound **7** (0.150 g, 0.38 mmol) was dissolved in toluene (5 mL), and to it, piperidine (0.259 g, 3.04 mmol) and CuI (7.24 mg, 0.038 mmol) were added. The mixture was stirred at 50 °C for 7 hours, then cooled down to room temperature, diluted with 10 mL DCM and washed with 10 mL H<sub>2</sub>O. The aqueous layer was extracted twice with DCM (5 mL) and the combined organic phase was dried over anhydrous Na<sub>2</sub>SO<sub>4</sub>. After evaporation of the solvents, the residue was purified by silica gel chromatography (DCM:Methanol = 90:10). Then to a stirred mixture of **8** (0.06 g, 0.25 mmol) in toluene (1.0 mL), PCl<sub>3</sub> (26.25 μL, 0.3 mmol) was added dropwise. The reaction mixture was stirred for 30 min at room temperature. Saturated solution of NaHCO<sub>3</sub> (5 mL) was added and then stirred for additional 5 min. The aqueous layer was then washed with DCM (20 mL x 3). The combined organic layer were dried over anhydrous Na<sub>2</sub>SO<sub>4</sub>, filtered, and concentrated under reduced pressure to give crude product, which was purified by column chromatography (hexane:ethyl acetate = 40:60).

## 6. *In-Situ* Detection of (2,2-Diphenylvinyl)(phenyl)selane by LC-MS

### ==== Shimadzu LabSolutions Data Report ====

#### <Spectrum>

Line#:1 R.Time:----(Scan#:----)  
MassPeaks:6  
RawMode:Averaged 0.438-0.887(151-305) BasePeak:335.1000(18910079)  
BG Mode:None Segment 1 - Event 1

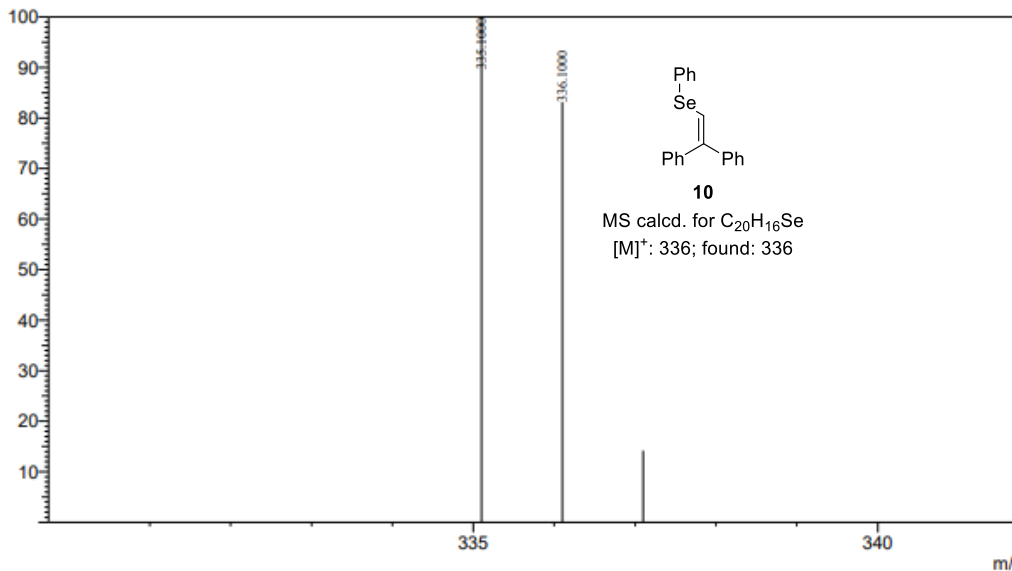

Line#:2 R.Time:----(Scan#:----)  
MassPeaks:37  
RawMode:Averaged 0.440-0.890(152-306) BasePeak:255.1000(644711)  
BG Mode:None Segment 1 - Event 2

**Figure S1:** *In-Situ* Detection of (2,2-Diphenylvinyl)(phenyl)selane by LC-MS  
Mass Spectrum of the Reaction Mixture of 1a and 2a in presence of DPE

## 7. Cyclic Voltammetry

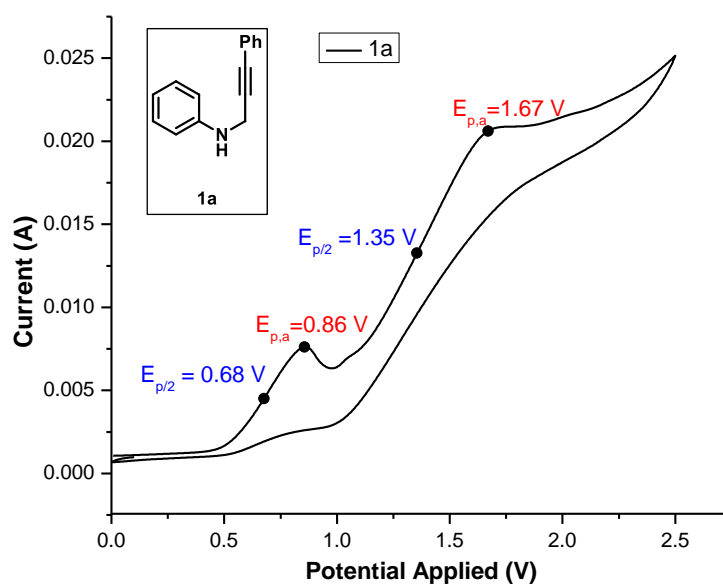

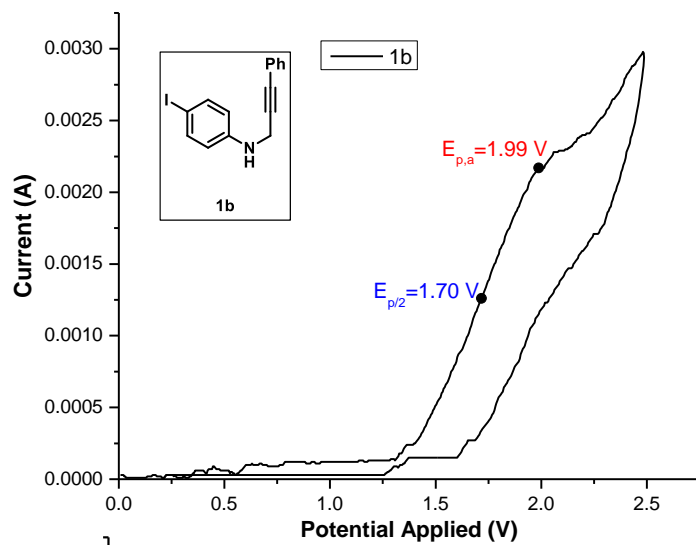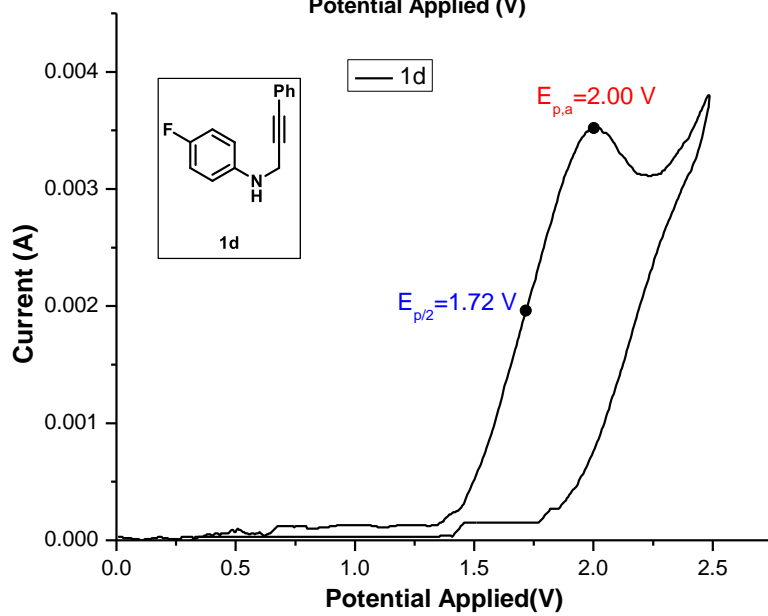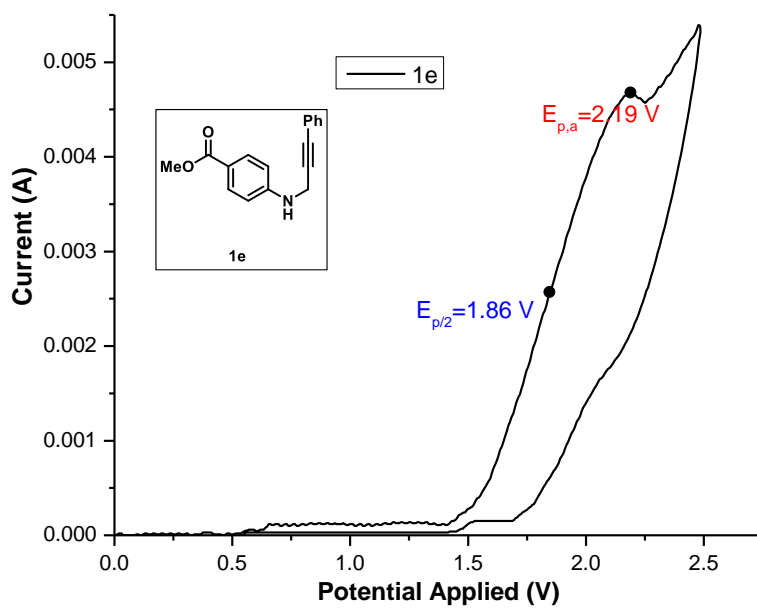

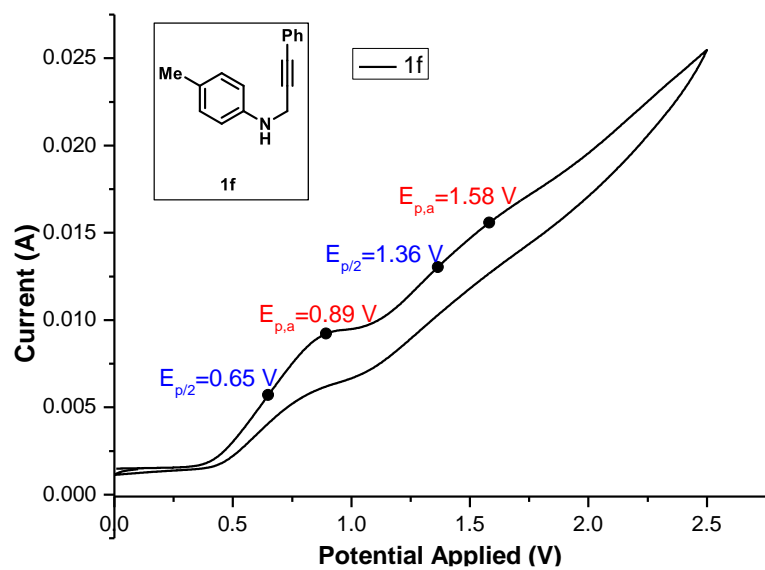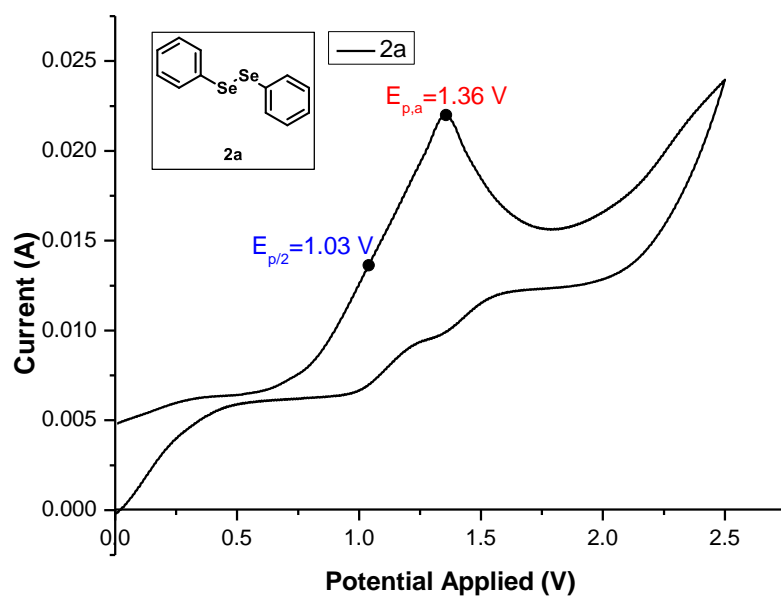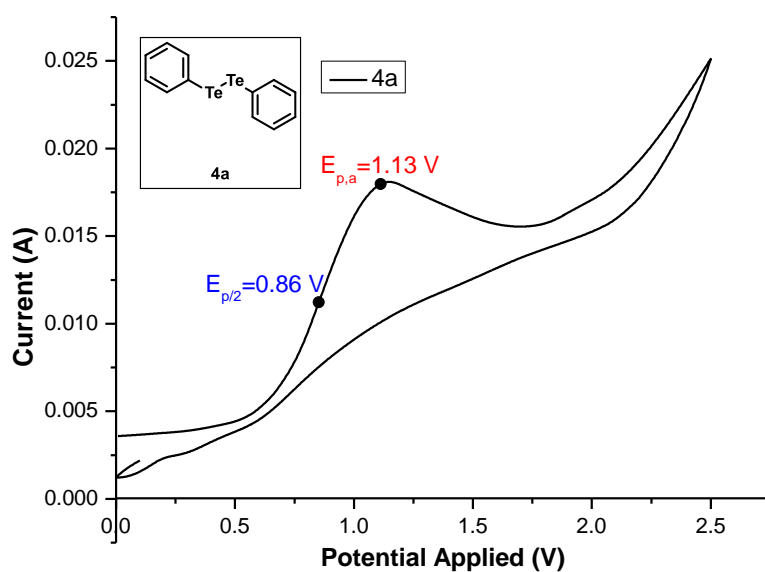

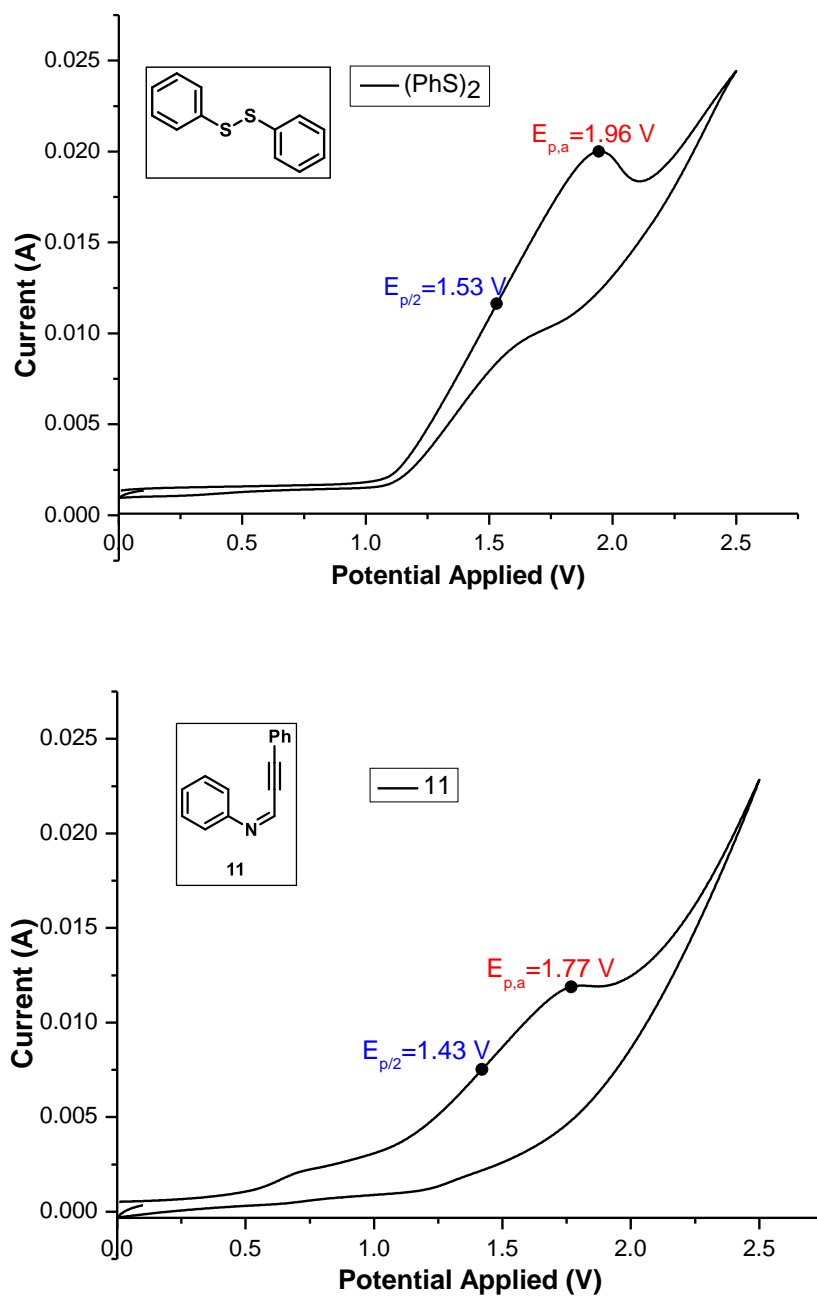

**Figure S2:** Cyclic Voltammograms of 1a, 1b, 1d, 1e, 1f, 2a, 4a, (PhS)<sub>2</sub> and 11



## 8. Calculation of Faradaic Efficiency

Faradaic Efficiency = Charge required for the formation of **3aa** / Total charge applied

Charge required for the generation of **3aa** (0.1 mmol scale) = nFM

$$= 3 e^- \times 96491 \text{ C mol}^{-1} \times 0.1 \times 10^{-3} \text{ mol} \times 0.92 = 26.634 \text{ C}$$

(Considering the 3-electron oxidation for the conversion of starting material **1a** to product **3aa** in 92% yield)

Total charge applied =  $I t = 0.005 \text{ A} \times 10800 \text{ s} = 54 \text{ C}$

Faradaic Efficiency =  $(26.634 / 54) \times 100\% = 49.32\%$

## 9. Characterization of all Synthesized Products

### 4-Phenyl-3-(phenylselanyl)quinoline (**3aa**):

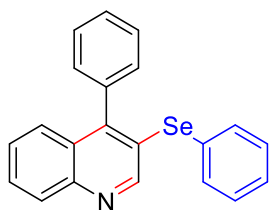

Yellow solid (0.153 g, 85% yield). Eluent: hexane: ethyl acetate (95:5). mp: 139-141 °C. **<sup>1</sup>H NMR (400 MHz, CDCl<sub>3</sub>)** δ 8.71 (s, 1H), 8.07 (d,  $J = 8.3$  Hz, 1H), 7.67 (ddd,  $J = 8.4, 6.7, 1.6$  Hz, 1H), 7.56 – 7.48 (m, 5H), 7.47 (dd,  $J = 3.0, 0.9$  Hz, 1H), 7.45 – 7.41 (m, 1H), 7.35 – 7.27 (m, 5H). **<sup>13</sup>C NMR (101 MHz, CDCl<sub>3</sub>)** δ 151.8, 147.6, 146.6, 138.6, 137.3, 135.0, 130.5, 129.5, 129.4, 128.9, 128.7, 128.6, 127.9, 127.1, 125.8.

### 6-Iodo-4-phenyl-3-(phenylselanyl)quinoline (**3ba**):

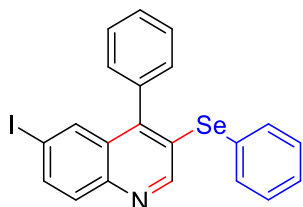

Yellow solid (0.202 g, 83%). Eluent: hexane: ethyl acetate (95:5). mp: 130-132 °C. **<sup>1</sup>H NMR (400 MHz, CDCl<sub>3</sub>)** δ 8.63 (s, 1H), 7.88 (d,  $J = 8.8$  Hz, 1H), 7.84 (s, 1H), 7.77 (d,  $J = 8.8$  Hz, 1H), 7.55 (d,  $J = 6.2$  Hz, 3H), 7.50 (d,  $J = 6.8$  Hz, 2H), 7.35 – 7.27 (m, 5H). **<sup>13</sup>C NMR (101**

**MHz, CDCl<sub>3</sub>)**  $\delta$  152.2, 146.5, 145.6, 137.8, 136.4, 135.1, 134.5, 131.2, 129.8, 129.5, 129.6, 129.0, 128.9, 128.70, 128.6, 128.2, 93.3.

**6-Bromo-4-phenyl-3-(phenylselanyl)quinoline (3ca):**

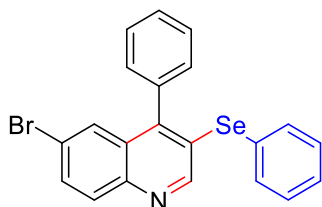

Yellow solid (0.181 g, 80%). Eluent: hexane: ethyl acetate (95:5). mp: 121-123 °C. **<sup>1</sup>H NMR (400 MHz, CDCl<sub>3</sub>)**  $\delta$  8.62 (s, 1H), 7.92 (d,  $J$  = 8.9 Hz, 1H), 7.71 (dd,  $J$  = 8.9, 2.2 Hz, 1H), 7.61 (d,  $J$  = 2.1 Hz, 1H), 7.58 – 7.55 (m, 3H), 7.52 – 7.49 (m, 2H), 7.36 – 7.28 (m, 5H). **<sup>13</sup>C NMR (101 MHz, CDCl<sub>3</sub>)**  $\delta$  152.1, 146.7, 145.3, 136.5, 135.1, 132.4, 131.3, 129.8, 129.2, 129.0, 128.95, 128.91, 128.6, 128.4, 127.9, 121.3.

**6-Fluoro-4-phenyl-3-(phenylselanyl)quinoline (3da):**

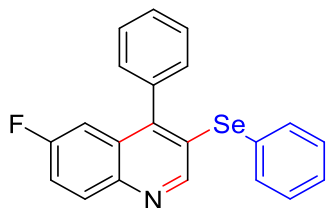

Yellow solid (0.147 g, 78%). Eluent: hexane: ethyl acetate (95:5). mp: 77-80 °C. **<sup>1</sup>H NMR (400 MHz, CDCl<sub>3</sub>)**  $\delta$  8.60 (s, 1H), 8.05 (dd,  $J$  = 9.2, 5.5 Hz, 1H), 7.62 – 7.47 (m, 5H), 7.41 (ddd,  $J$  = 9.1, 8.0, 2.8 Hz, 1H), 7.36 – 7.27 (m, 5H), 7.08 (dd,  $J$  = 10.1, 2.8 Hz, 1H). **<sup>13</sup>C NMR (101 MHz, CDCl<sub>3</sub>)**  $\delta$  160.9 (d,  $J$  = 248.3 Hz), 151.1, 147.2 (d,  $J$  = 5.5 Hz), 143.8, 136.7, 135.0, 132.0 (d,  $J$  = 9.3 Hz), 129.8, 129.2, 128.9, 128.8, 128.6, 128.2, 119.1 (d,  $J$  = 25.9 Hz), 109.3 (d,  $J$  = 23.3 Hz).

**Methyl 4-phenyl-3-(phenylselanyl)quinoline-6-carboxylate (3ea):**

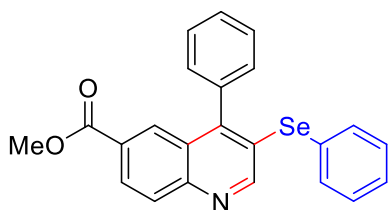

Off white solid (0.173 g, 80%). Eluent: hexane: ethyl acetate (95:5). mp:136-138 °C. **<sup>1</sup>H NMR (400 MHz, CDCl<sub>3</sub>)** δ 8.71 (s, 1H), 8.24 (s, 1H), 8.22 (d, *J* = 1.9 Hz, 1H), 8.09 (dd, *J* = 8.4, 1.0 Hz, 1H), 7.59 – 7.54 (m, 3H), 7.51 (dd, *J* = 8.0, 1.6 Hz, 2H), 7.37 – 7.27 (m, 5H), 3.88 (s, 3H). **<sup>13</sup>C NMR (101 MHz, CDCl<sub>3</sub>)** δ 165.5, 152.7, 147.9, 147.4, 135.4, 134.0, 128.8, 128.7, 128.2, 128.0, 127.8, 127.7, 127.6, 127.4, 127.3, 126.1, 51.3. **<sup>77</sup>Se NMR (76 MHz, CDCl<sub>3</sub>)** δ 376.7 (s). **HRMS (ESI)** *m/z* calcd. for [M+H]<sup>+</sup>:420.0503; Found: 420.0506.

#### 6-Methyl-4-phenyl-3-(phenylselanyl)quinoline (3fa):

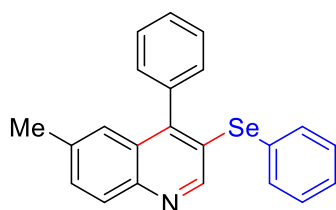

Yellow solid (0.112 g, 60%). Eluent: hexane: ethyl acetate (95:5). mp: 115-119 °C. **<sup>1</sup>H NMR (400 MHz, CDCl<sub>3</sub>)** δ 8.58 (s, 1H), 8.01 (d, *J* = 8.4 Hz, 1H), 7.82 (d, *J* = 6.9 Hz, 2H), 7.63 – 7.56 (m, 1H), 7.47 (dd, *J* = 8.3, 0.7 Hz, 1H), 7.39 – 7.32 (m, 2H), 7.24 (s, 2H), 7.22 (d, *J* = 1.9 Hz, 2H), 7.08 – 7.01 (m, 2H), 3.87 (s, 3H). **<sup>13</sup>C NMR (101 MHz, CDCl<sub>3</sub>)** δ 151.5, 147.9, 145.5, 137.5, 137.2, 134.4, 131.4, 129.7, 129.6, 129.4, 129.3, 128.6, 128.5, 128.1, 127.9, 126.6, 124.8, 21.8.

#### 8-Methoxy-4-phenyl-3-(phenylselanyl)quinoline (3ga):

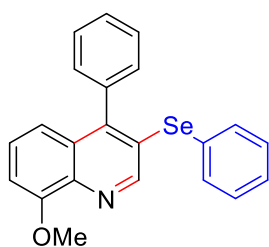

Yellow solid (0.103 g, 53%). Eluent: hexane: ethyl acetate (95:5). mp: 151-154 °C. **<sup>1</sup>H NMR (400 MHz, CDCl<sub>3</sub>)** δ 8.59 (s, 1H), 7.42 (d, *J* = 6.2 Hz, 3H), 7.38 (d, *J* = 6.5 Hz, 2H), 7.20 (ddd, *J* = 16.1, 9.0, 4.5 Hz, 6H), 6.93 (dd, *J* = 12.3, 8.2 Hz, 2H), 3.98 (s, 3H). **<sup>13</sup>C NMR (101 MHz, CDCl<sub>3</sub>)** δ 155.5, 150.9, 148.1, 138.7, 137.5, 134.6, 129.6, 129.3, 129.0, 128.6, 128.5, 128.2, 127.7, 127.2, 117.7, 107.2, 56.1. **<sup>77</sup>Se NMR (76 MHz, CDCl<sub>3</sub>)** δ 371.2. **HRMS (ESI)** *m/z* calcd. for C<sub>22</sub>H<sub>18</sub>NOSe<sup>+</sup> [M+H]<sup>+</sup>:392.0554; Found: 392.0557.

#### 4,8-Diphenyl-3-(phenylselanyl)quinoline (3ha):

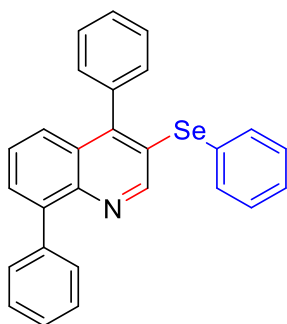

Yellow solid (0.139 g, 64%). Eluent: hexane: ethyl acetate (95:5). mp: 140-142 °C. **<sup>1</sup>H NMR (400 MHz, CDCl<sub>3</sub>)** δ 8.66 (s, 1H), 7.65 (ddd, *J* = 8.0, 4.3, 1.9 Hz, 3H), 7.60 – 7.54 (m, 3H), 7.52 (td, *J* = 4.2, 1.9 Hz, 1H), 7.50 (d, *J* = 1.7 Hz, 1H), 7.49 – 7.47 (m, 2H), 7.47 – 7.44 (m, 2H), 7.39 (ddd, *J* = 7.4, 4.1, 1.4 Hz, 3H), 7.32 – 7.27 (m, 3H). **<sup>13</sup>C NMR (101 MHz, CDCl<sub>3</sub>)** δ 151.4, 147.6, 144.4, 141.1, 139.6, 137.6, 135.3, 130.6, 129.8, 129.7, 129.4, 128.7, 128.6, 128.4, 128.3, 128.0, 127.4, 127.1, 126.7, 125.6. **<sup>77</sup>Se NMR (76 MHz, CDCl<sub>3</sub>)** δ 374.5. **HRMS (ESI)** *m/z* calcd. for [M+H]<sup>+</sup>:438.0761; Found: 438.0768.

#### 5-Fluoro-4-phenyl-3-(phenylselanyl)quinoline (3ia):

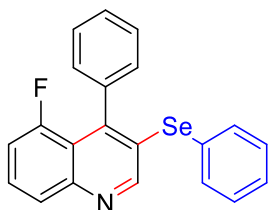

Yellow solid (0.093 g, 50%). Eluent: hexane: ethyl acetate (95:5). mp: 75-77 °C. **<sup>1</sup>H NMR (400 MHz, CDCl<sub>3</sub>)** δ 8.71 (s, 1H), 7.70 (dd, *J* = 9.8, 2.5 Hz, 1H), 7.53 (dd, *J* = 5.1, 1.8 Hz, 3H), 7.51 – 7.44 (m, 3H), 7.35 – 7.27 (m, 5H), 7.23 – 7.18 (m, 1H). **<sup>13</sup>C NMR (101 MHz, CDCl<sub>3</sub>)** δ 164.0, 161.5, 153.6, 148.6, 147.9 (d, *J* = 12.5 Hz), 137.0, 134.5, 129.7, 129.4, 129.2, 128.8, 128.7, 128.4, 128.3, 126.0, 125.1, 115.2 (dd, *J* = 432.3, 22.7 Hz). **<sup>19</sup>F NMR (377 MHz, CDCl<sub>3</sub>)** δ -110.4. **<sup>77</sup>Se NMR (76 MHz, CDCl<sub>3</sub>)** δ 370.0. **HRMS (ESI)** *m/z* calcd. for C<sub>21</sub>H<sub>15</sub>FNSe<sup>+</sup>: [M+H]<sup>+</sup>:380.0354; Found: 380.0357

#### 7-Fluoro-4-phenyl-3-(phenylselanyl)quinoline (3ia'):

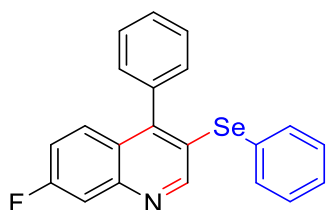

Yellow solid (0.054 g, 29%). Eluent: hexane: ethyl acetate (95:5). mp: 78-80 °C.  $^1\text{H NMR}$  (400 MHz,  $\text{CDCl}_3$ )  $\delta$  8.56 (s, 1H), 7.88 (d,  $J = 8.4$  Hz, 1H), 7.58 (dd,  $J = 8.2, 5.5$  Hz, 1H), 7.55 (d,  $J = 6.7$  Hz, 2H), 7.52 – 7.48 (m, 3H), 7.38 – 7.30 (m, 6H), 7.09 (dd,  $J = 11.8, 7.8$  Hz, 1H).  $^{13}\text{C NMR}$  (101 MHz,  $\text{CDCl}_3$ )  $\delta$  159.1, 156.5, 151.8, 148.1, 143.9, 139.7, 135.5, 129.9, 128.8, 128.5, 128.4, 128.3, 128.05, 128.02, 125.9 (d,  $J = 3.7$  Hz), 118.2 (d,  $J = 9.2$  Hz), 112.4 (d,  $J = 21.7$  Hz).  $^{19}\text{F NMR}$  (377 MHz,  $\text{CDCl}_3$ )  $\delta$  -107.8.  $^{77}\text{Se NMR}$  (76 MHz,  $\text{CDCl}_3$ )  $\delta$  379.2. HRMS (ESI)  $m/z$  calcd. for  $\text{C}_{21}\text{H}_{15}\text{FNSe}^+$ :  $[\text{M}+\text{H}]^+$ :380.0354; Found: 380.0357

### 7-(*tert*-Butyl)-4-phenyl-3-(phenylselanyl)quinoline (3ja):

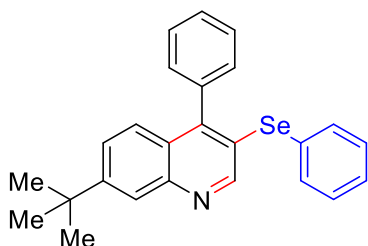

Yellow solid (0.135 g, 65%). Eluent: hexane: ethyl acetate (95:5). mp: 87-89 °C.  $^1\text{H NMR}$  (400 MHz,  $\text{CDCl}_3$ )  $\delta$  8.75 (s, 1H), 8.04 (d,  $J = 1.5$  Hz, 1H), 7.55 – 7.48 (m, 4H), 7.45 (s, 1H), 7.41 (dd,  $J = 9.3, 3.1$  Hz, 2H), 7.31 – 7.22 (m, 5H), 1.41 (s, 9H).  $^{13}\text{C NMR}$  (101 MHz,  $\text{CDCl}_3$ )  $\delta$  153.0, 152.6, 148.9, 147.1, 137.4, 133.8, 130.2, 129.5, 129.3, 128.5, 127.9, 126.0, 125.7, 125.4, 124.8, 35.0, 31.1.  $^{77}\text{Se NMR}$  (76 MHz,  $\text{CDCl}_3$ )  $\delta$  365.2. HRMS (ESI)  $m/z$  calcd. for  $\text{C}_{25}\text{H}_{24}\text{NSe}^+$ :  $[\text{M}+\text{H}]^+$ :418.1074; Found: 418.1078.

### 2-Methyl-4-phenyl-3-(phenylselanyl)quinoline (3ka):

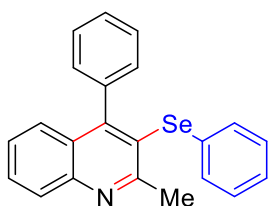

Yellow solid (0.135 g, 72%). Eluent: hexane: ethyl acetate (95:5). mp: 130-133 °C.  $^1\text{H NMR}$  (400 MHz,  $\text{CDCl}_3$ )  $\delta$  8.08 (d,  $J = 8.4$  Hz, 1H), 7.71 (ddd,  $J = 8.4, 5.2, 3.1$  Hz, 1H), 7.46 – 7.38 (m, 5H), 7.21 – 7.17 (m, 2H), 7.14 – 7.11 (m, 3H), 7.07 – 7.03 (m, 2H), 2.87 (s, 3H).  $^{13}\text{C NMR}$  (101 MHz,  $\text{CDCl}_3$ )  $\delta$  162.1, 154.9, 147.5, 139.0, 133.0, 130.1, 129.7, 129.3, 129.1, 128.7, 128.1, 128.0, 127.2, 127.0, 126.3, 126.2, 124.5, 27.3.  $^{77}\text{Se NMR}$  (76 MHz,  $\text{CDCl}_3$ )  $\delta$  348.6. HRMS (ESI)  $m/z$  calcd. for  $\text{C}_{22}\text{H}_{18}\text{NSe}^+$ :  $[\text{M}+\text{H}]^+$ :376.0599; Found: 376.0607.

### 2,4-Diphenyl-3-(phenylselanyl)quinoline (3la):

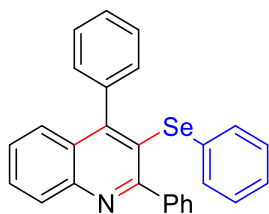

Golden yellow solid (0.132 g, 61%). Eluent: hexane: ethyl acetate (95:5). mp: 132-134 °C. **<sup>1</sup>H NMR (400 MHz, CDCl<sub>3</sub>)** δ 8.01 (d, *J* = 8.2 Hz, 1H), 7.57 – 7.50 (m, 1H), 7.35 – 7.20 (m, 7H), 7.17 – 7.02 (m, 5H), 6.90 – 6.51 (m, 5H). **<sup>13</sup>C NMR (101 MHz, CDCl<sub>3</sub>)** δ 162.9, 154.6, 147.3, 142.1, 138.8, 133.1, 131.8, 130.0, 129.6, 129.5, 129.1, 128.6, 128.1, 128.0, 127.6, 127.4, 126.9, 126.8, 126.4, 125.2.

### 3-(Phenylselanyl)-4-(4-(trifluoromethyl)phenyl)quinoline (3ma):

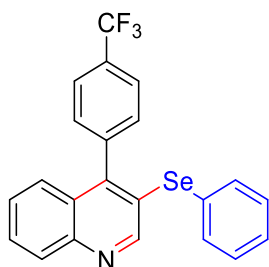

Orange liquid (0.182 g, 85%). Eluent: hexane: ethyl acetate (95:5). **<sup>1</sup>H NMR (400 MHz, CDCl<sub>3</sub>)** δ 8.69 (s, 1H), 7.93 (d, *J* = 8.8 Hz, 1H), 7.66 (d, *J* = 8.0 Hz, 2H), 7.62 (dd, *J* = 8.8, 1.9 Hz, 1H), 7.47 (dd, *J* = 8.2, 1.3 Hz, 2H), 7.40 (dd, *J* = 8.2, 1.4 Hz, 2H), 7.32 (dt, *J* = 5.2, 1.8 Hz, 1H), 7.30 – 7.28 (m, 1H), 7.23 (ddd, *J* = 4.2, 3.7, 2.1 Hz, 2H), 7.10 (d, *J* = 1.9 Hz, 1H). **<sup>13</sup>C NMR (101 MHz, CDCl<sub>3</sub>)** δ 153.5, 150.7, 147.4, 137.1, 135.9, 133.1, 132.8, 129.8, 129.6, 129.2, 128.7, 128.5, 128.0, 127.4, 126.4, 126.1 (d, *J* = 3.5 Hz), 124.7. **<sup>19</sup>F NMR (377 MHz, CDCl<sub>3</sub>)** δ -62.57. **<sup>77</sup>Se NMR (76 MHz, CDCl<sub>3</sub>)** δ 397.1.

### 4-(4-Methoxyphenyl)-3-(phenylselanyl)quinoline (3na):

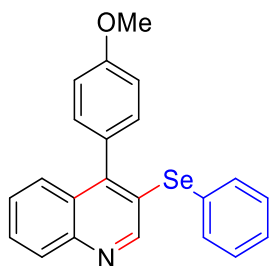

Orange solid (0.132 g, 68%). (Eluent: hexane: ethyl acetate (95:5). mp: 92-94°C **<sup>1</sup>H NMR (400 MHz, CDCl<sub>3</sub>)**: δ 8.58 (s, 1H), 8.01 (d, *J* = 8.4 Hz, 1H), 7.82 (d, *J* = 6.9 Hz, 2H), 7.65 – 7.56 (m,

1H), 7.47 (dd,  $J = 8.3, 0.7$  Hz, 1H), 7.39 – 7.31 (m, 2H), 7.24 (s, 2H), 7.22 (d,  $J = 1.9$  Hz, 2H), 7.04 (d,  $J = 8.6$  Hz, 2H), 3.87 (s, 3H).  $^{13}\text{C}$  NMR (101 MHz,  $\text{CDCl}_3$ )  $\delta$  152.2, 146.0, 145.7, 140.3, 135.1, 134.5, 133.3, 131.8, 130.1, 129.7, 129.6, 129.0, 128.6, 128.5, 128.4, 128.1, 127.0, 126.0, 125.6 (d,  $J = 3.4$  Hz), 124.0 (q,  $J = 270$  Hz).

$^{13}\text{C}$  NMR (101 MHz,  $\text{CDCl}_3$ )  $\delta$  152.2, 146.0, 145.7, 140.3, 135.1, 134.5, 133.3, 131.8, 130.1, 129.7, 129.6, 129.0, 128.6, 128.5, 128.4, 128.1, 127.0, 126.0, 125.6 (d,  $J = 3.4$  Hz), 124.0 (q,  $J = 270$  Hz).

#### 4-(Naphthalen-1-yl)-3-(phenylselanyl)quinoline (3oa):

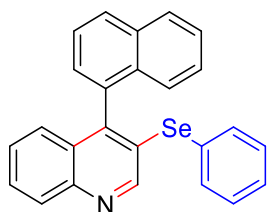

Yellow solid (0.157 g, 77%). Eluent: hexane: ethyl acetate (95:5). mp: 80-82°C.  $^1\text{H}$  NMR (400 MHz,  $\text{CDCl}_3$ ) (400 MHz,  $\text{CDCl}_3$ )  $\delta$  8.79 (s, 1H), 8.13 (d,  $J = 8.4$  Hz, 1H), 8.01 (dd,  $J = 19.4, 8.3$  Hz, 2H), 7.70 – 7.59 (m, 2H), 7.56 – 7.49 (m, 1H), 7.45 (dd,  $J = 8.0, 1.4$  Hz, 2H), 7.40 (dd,  $J = 7.0, 1.0$  Hz, 1H), 7.36 – 7.26 (m, 4H), 7.25 – 7.20 (m, 3H).  $^{13}\text{C}$  NMR (101 MHz,  $\text{CDCl}_3$ )  $\delta$  152.4, 146.8, 146.6, 134.9, 134.8, 133.6, 131.3, 129.6, 129.5, 129.3, 129.2, 129.1, 128.6, 128.3, 127.5, 127.3, 126.7, 126.3, 126.2, 125.4.

#### 4-Methyl-3-(phenylselanyl)quinoline (3pa):

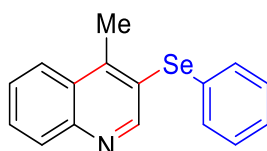

Yellow liquid (0.083 g, 56%). Eluent: hexane: ethyl acetate (98:2).  $^1\text{H}$  NMR (400 MHz,  $\text{CDCl}_3$ )  $\delta$  8.88 (s, 1H), 8.06 (t,  $J = 8.1$  Hz, 2H), 7.71 (t,  $J = 7.5$  Hz, 1H), 7.59 (t,  $J = 7.6$  Hz, 1H), 7.38 (m,  $J = 2.4$  Hz, 2H), 7.25 (m,  $J = 5.1$  Hz, 3H), 2.86 (s, 3H).  $^{13}\text{C}$  NMR (101 MHz,  $\text{CDCl}_3$ )  $\delta$  154.8, 147.2, 146.9, 132.0, 130.8, 130.1, 129.6, 129.4, 128.4, 127.3, 127.0, 125.7, 124.2, 18.5.

#### 3-((2-Chlorophenyl)selanyl)-4-phenylquinoline (3ab):

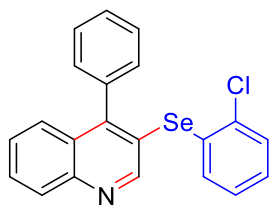

Yellow solid (0.108 g, 55%). Eluent: hexane: ethyl acetate (95:5). mp: 78-82°C  $^1\text{H NMR}$  (400 MHz,  $\text{CDCl}_3$ )  $\delta$  8.85 (s, 1H), 8.13 (d,  $J = 8.3$  Hz, 1H), 7.72 (ddd,  $J = 8.4, 6.7, 1.5$  Hz, 1H), 7.53 (dd,  $J = 8.5, 1.0$  Hz, 1H), 7.50 (ddd,  $J = 4.5, 3.5, 1.7$  Hz, 3H), 7.48 – 7.44 (m, 1H), 7.36 (dd,  $J = 7.9, 1.4$  Hz, 1H), 7.30 (ddd,  $J = 5.5, 2.9, 1.5$  Hz, 2H), 7.21 – 7.15 (m, 2H), 7.08 (ddd,  $J = 8.0, 7.2, 1.4$  Hz, 1H).  $^{13}\text{C NMR}$  (101 MHz,  $\text{CDCl}_3$ )  $\delta$  154.0, 151.1, 147.4, 137.1, 135.7, 133.5, 131.7, 129.8, 129.7, 129.6, 129.1, 128.6, 128.5, 128.1, 127.5, 127.2, 126.4, 124.4.  $^{77}\text{Se NMR}$  (76 MHz,  $\text{CDCl}_3$ )  $\delta$  358.5. **HRMS (ESI)**  $m/z$  calcd. for  $\text{C}_{21}\text{H}_{15}\text{ClNSe}^+$   $[\text{M}+\text{H}]^+$ :396.0058; Found: 396.0062.

### 3-((2-Fluorophenyl)selanyl)-4-phenylquinoline (3ac):

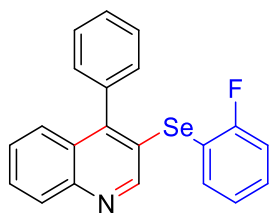

Yellow solid (0.128 g, 68%). Eluent: hexane: ethyl acetate (95:5). mp: 71-73 °C.  $^1\text{H NMR}$  (400 MHz,  $\text{CDCl}_3$ )  $\delta$  8.73 (s, 1H), 8.09 (d,  $J = 8.4$  Hz, 1H), 7.72 – 7.65 (m, 1H), 7.56 – 7.50 (m, 3H), 7.49 (s, 1H), 7.47 – 7.40 (m, 1H), 7.40 – 7.28 (m, 4H), 7.06 (dt,  $J = 10.5, 8.0$  Hz, 2H).  $^{13}\text{C NMR}$  (101 MHz,  $\text{CDCl}_3$ )  $\delta$  163.2, 160.7, 152.5, 149.2, 147.0, 137.1, 136.0, 130.6 (d,  $J = 7.7$  Hz), 129.5, 129.3, 128.7, 128.6, 128.0, 127.2, 126.1, 125.1 (d,  $J = 3.2$  Hz), 124.9, 116.6 (d,  $J = 22.0$  Hz), 116.0 (d,  $J = 23.3$  Hz).  $^{19}\text{F NMR}$  (377 MHz,  $\text{CDCl}_3$ )  $\delta$  -102.0.  $^{77}\text{Se NMR}$  (76 MHz,  $\text{CDCl}_3$ )  $\delta$  292.1. **HRMS (ESI)**  $m/z$  calcd. for  $\text{C}_{21}\text{H}_{15}\text{FNSe}^+$   $[\text{M}+\text{H}]^+$ :380.0354; Found: 380.0355.

### 3-((4-Bromophenyl)selanyl)-4-phenylquinoline (3ad):

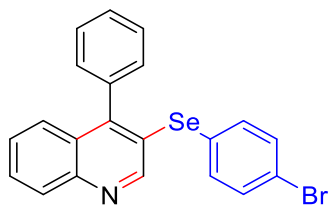

Yellow solid (0.153 g, 70%). Eluent: hexane: ethyl acetate (95:5). mp: 74-77 °C.  $^1\text{H NMR}$  (400 MHz,  $\text{CDCl}_3$ )  $\delta$  8.62 (s, 1H), 7.92 (d,  $J = 8.9$  Hz, 1H), 7.71 (dd,  $J = 8.9, 2.2$  Hz, 1H), 7.61 (d,  $J =$



2.1 Hz, 1H), 7.58 – 7.55 (m, 3H), 7.52 – 7.49 (m, 2H), 7.36 – 7.28 (m, 5H).  $^{13}\text{C}$  NMR (101 MHz,  $\text{CDCl}_3$ )  $\delta$  152.1, 146.7, 145.3, 136.5, 135.1, 132.4, 131.3, 129.8, 129.2, 129.0, 128.95, 128.91, 128.6, 128.4, 127.9, 121.3.

#### 4-Phenyl-3-((4-(trifluoromethyl)phenyl)selanyl)quinoline (3ae):

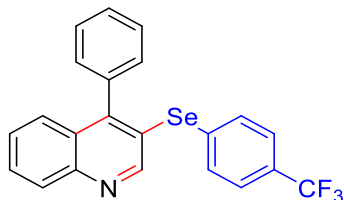

Yellow solid (0.128 g, 60%). Eluent: hexane: ethyl acetate (95:5). mp: 75-77 °C  $^1\text{H}$  NMR (400 MHz,  $\text{CDCl}_3$ )  $\delta$  8.86 (s, 1H), 8.13 (d,  $J = 8.4$  Hz, 1H), 7.72 (ddd,  $J = 8.4, 6.7, 1.6$  Hz, 1H), 7.54 – 7.48 (m, 5H), 7.47 – 7.42 (m, 5H), 7.28 – 7.27 (m, 1H).  $^{13}\text{C}$  NMR (101 MHz,  $\text{CDCl}_3$ )  $\delta$  153.6, 150.7, 147.4, 137.1, 136.0, 132.8, 129.8, 129.8, 129.6, 129.2, 128.7, 128.5, 128.0, 127.4, 126.4, 126.1 (d,  $J = 3.5$  Hz), 125.3, 124.0 (q,  $J = 270$  Hz).  $^{19}\text{F}$  NMR (377 MHz,  $\text{CDCl}_3$ )  $\delta$  -62.73.

#### 4-Phenyl-3-(p-tolylselanyl)quinoline (3af):

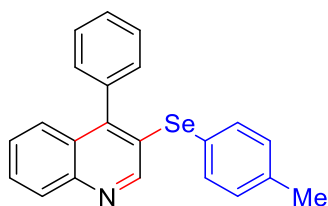

Yellow solid (0.159 g, 85%). Eluent: hexane: ethyl acetate (95:5). mp: 101-103 °C.  $^1\text{H}$  NMR (400 MHz,  $\text{CDCl}_3$ )  $\delta$  8.64 (s, 1H), 8.06 (d,  $J = 8.3$  Hz, 1H), 7.65 (ddd,  $J = 8.3, 6.7, 1.5$  Hz, 1H), 7.56 – 7.51 (m, 1H), 7.48 (dt,  $J = 7.9, 1.9$  Hz, 1H), 7.41 (d,  $J = 8.2$  Hz, 1H), 7.35 (dd,  $J = 7.6, 1.8$  Hz, 1H), 7.11 (d,  $J = 7.8$  Hz, 1H), 2.35 (s, 1H).  $^{13}\text{C}$  NMR (101 MHz,  $\text{CDCl}_3$ )  $\delta$  151.8, 147.6, 146.6, 138.6, 137.3, 135.2, 130.5, 129.5, 129.4, 128.9, 128.6, 127.9, 127.3, 127.1, 125.8, 125.2.

#### 3-((4-Methoxyphenyl)selanyl)-4-phenylquinoline (3ag):

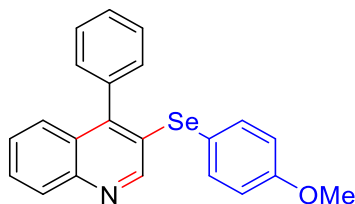

Yellow solid (0.177 g, 91%). Eluent: hexane: ethyl acetate (95:5). mp: 74-78 °C  $^1\text{H}$  NMR (400 MHz,  $\text{CDCl}_3$ )  $\delta$  8.58 (s, 1H), 8.06 (d,  $J = 8.2$  Hz, 1H), 7.63 (ddd,  $J = 8.3, 6.7, 1.5$  Hz, 1H), 7.58 –

7.52 (m, 3H), 7.51 – 7.46 (m, 3H), 7.42 – 7.38 (m, 1H), 7.37 – 7.34 (m, 2H), 6.88 – 6.83 (m, 2H), 3.80 (s, 3H).  $^{13}\text{C}$  NMR (101 MHz,  $\text{CDCl}_3$ )  $\delta$  160.3, 151.1, 146.81, 146.5, 137.5, 137.2, 129.5, 129.4, 128.7, 128.6, 127.9, 127.8, 127.1, 125.7, 118.5, 115.5, 55.4.

### 3-([1,1'-Biphenyl]-2-ylselanyl)-4-phenylquinoline (3ah):

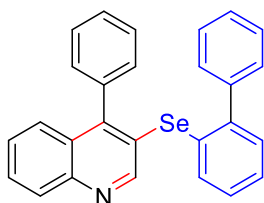

Yellow solid (0.177 g, 81%). Eluent: hexane: ethyl acetate (95:5). mp: 120-122 °C.  $^1\text{H}$  NMR (400 MHz,  $\text{CDCl}_3$ )  $\delta$  8.72 (s, 1H), 8.10 (d,  $J = 8.4$  Hz, 1H), 7.67 (t,  $J = 7.5$  Hz, 1H), 7.46 (d,  $J = 5.7$  Hz, 4H), 7.42 (d,  $J = 6.6$  Hz, 1H), 7.37 (dd,  $J = 13.8, 6.0$  Hz, 1H), 7.32 (d,  $J = 6.4$  Hz, 5H), 7.25 – 7.22 (m, 2H), 7.20 (dd,  $J = 8.1, 1.4$  Hz, 1H), 7.16 (dd,  $J = 4.6, 3.0$  Hz, 2H).  $^{13}\text{C}$  NMR (101 MHz,  $\text{CDCl}_3$ )  $\delta$  153.7, 148.6, 146.0, 145.1, 144.4, 141.6, 136.7, 134.6, 134.0, 133.1, 131.0, 130.8, 130.6, 130.5, 130.4, 130.3, 130.1, 129.21, 129.18, 129.0, 128.4, 128.2, 127.9, 127.9, 127.6, 127.51, 127.45.  $^{77}\text{Se}$  NMR (76 MHz,  $\text{CDCl}_3$ )  $\delta$  373.1. HRMS (ESI)  $m/z$  calcd. for  $\text{C}_{27}\text{H}_{20}\text{NSe}^+$   $[\text{M}+\text{H}]^+$ :438.0761; Found: 438.0760.

### 3-(Naphthalen-1-ylselanyl)-4-phenylquinoline (3ai):

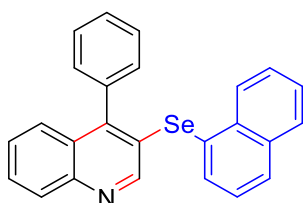

Brown liquid (0.156 g, 76%). Eluent: hexane: ethyl acetate (95:5).  $^1\text{H}$  NMR (400 MHz,  $\text{CDCl}_3$ )  $\delta$  8.37 (s, 1H), 8.20 (d,  $J = 7.9$  Hz, 1H), 8.00 (d,  $J = 8.3$  Hz, 1H), 7.90 (d,  $J = 8.2$  Hz, 1H), 7.85 (d,  $J = 7.3$  Hz, 2H), 7.66 – 7.61 (m, 1H), 7.58 (ddd,  $J = 5.6, 5.1, 1.6$  Hz, 2H), 7.50 (d,  $J = 7.3$  Hz, 2H), 7.47 (d,  $J = 1.7$  Hz, 1H), 7.45 (d,  $J = 1.8$  Hz, 1H), 7.44 – 7.41 (m, 2H), 7.39 (dd,  $J = 5.6, 4.8$  Hz, 1H).  $^{13}\text{C}$  NMR (101 MHz,  $\text{CDCl}_3$ )  $\delta$  151.3, 147.4, 146.6, 137.2, 135.6, 134.5, 134.3, 130.2, 129.5, 129.4, 128.8, 128.7, 127.9, 127.8, 127.3, 127.1, 126.9, 126.5, 126.1, 125.7.

### 3-(Methylselanyl)-4-phenylquinoline (3aj):

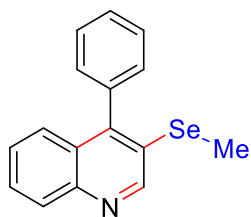

Yellow solid (0.137 g, 92%). Eluent: hexane: ethyl acetate (95:5). mp: 125-128 °C. **<sup>1</sup>H NMR (400 MHz, CDCl<sub>3</sub>)** δ 8.96 (s, 1H), 8.11 (d, *J* = 8.4 Hz, 1H), 7.65 (ddd, *J* = 8.4, 6.5, 1.8 Hz, 1H), 7.58 – 7.49 (m, 3H), 7.45 (ddd, *J* = 8.5, 1.8, 0.6 Hz, 1H), 7.43 – 7.38 (m, 1H), 7.34 – 7.30 (m, 2H), 2.33 (s, 3H). **<sup>13</sup>C NMR (101 MHz, CDCl<sub>3</sub>)** δ 149.3, 146.9, 145.5, 136.2, 128.4, 128.3, 127.7, 127.6, 127.5, 126.6, 126.0, 124.7, 124.6, 6.3.

### 3-(Benzylselanyl)-4-phenylquinoline (3ak):

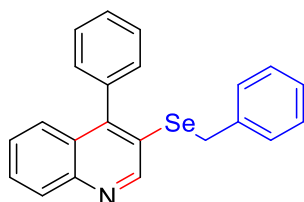

Yellow solid (0.159 g, 85%). Eluent: hexane: ethyl acetate (95:5). mp: 102-105 °C. **<sup>1</sup>H NMR (400 MHz, CDCl<sub>3</sub>)** δ 9.04 (s, 1H), 8.13 (d, *J* = 8.5 Hz, 1H), 7.68 (ddd, *J* = 8.4, 6.4, 1.8 Hz, 1H), 7.50 – 7.46 (m, 3H), 7.45 – 7.39 (m, 2H), 7.22 – 7.10 (m, 7H), 4.06 (s, 2H). **<sup>13</sup>C NMR (101 MHz, CDCl<sub>3</sub>)** δ 153.0, 150.3, 147.0, 137.6, 137.4, 129.5, 129.4, 129.2, 128.9, 128.5, 128.4, 127.4, 127.1, 127.0, 126.2, 124.9, 31.9. **<sup>77</sup>Se NMR (76 MHz, CDCl<sub>3</sub>)** δ 318.1. **HRMS (ESI)** *m/z* calcd. for C<sub>22</sub>H<sub>18</sub>NSe<sup>+</sup> [M+H]<sup>+</sup>:376.0604; Found: 376.0609.

### 4-Phenyl-3-(phenyltellanyl)quinoline (5aa):

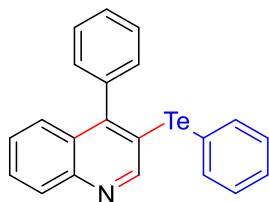

Orange solid (0.184 g, 90%). Eluent: hexane: ethyl acetate (95:5). mp: 142-146 °C. **<sup>1</sup>H NMR (400 MHz, CDCl<sub>3</sub>)** δ 8.56 (s, 1H), 7.96 (d, *J* = 8.4 Hz, 1H), 7.74 (d, *J* = 7.1 Hz, 2H), 7.54 (dd, *J* = 11.0, 3.9 Hz, 1H), 7.47 – 7.40 (m, 3H), 7.36 (d, *J* = 7.8 Hz, 1H), 7.29 (dd, *J* = 11.9, 7.2 Hz, 2H), 7.25 – 7.21 (m, 2H), 7.21 – 7.15 (m, 2H). **<sup>13</sup>C NMR (101 MHz, CDCl<sub>3</sub>)** δ 154.0, 151.1, 147.0, 140.5,

139.8, 129.9, 129.4, 129.1, 129.0, 128.9, 128.8, 128.1, 126.9, 125.8, 114.6, 113.3. **HRMS (ESI)**  $m/z$  calcd. for  $C_{21}H_{16}N\text{Te}^+$   $[M+H]^+$ :412.0345; Found: 412.0350.

#### 6-Iodo-4-phenyl-3-(phenyltellanyl)quinoline (5ba):

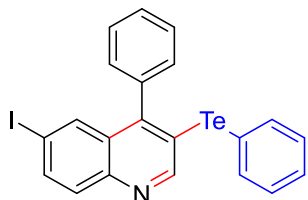

Yellow solid (0.246 g, 92%). Eluent: hexane: ethyl acetate (95:5). mp: 142-145 °C.  **$^1\text{H}$  NMR (400 MHz,  $\text{CDCl}_3$ )**  $\delta$  8.57 (s, 1H), 7.89 – 7.84 (m, 3H), 7.79 (d,  $J = 1.7$  Hz, 1H), 7.75 (d,  $J = 8.8$  Hz, 1H), 7.60 – 7.55 (m, 3H), 7.41 (t,  $J = 7.5$  Hz, 1H), 7.30 (dt,  $J = 9.6, 5.9$  Hz, 4H).  **$^{13}\text{C}$  NMR (101 MHz,  $\text{CDCl}_3$ )**  $\delta$  154.1, 149.5, 145.9, 140.8, 139.0, 137.8, 134.4, 131.1, 130.1, 129.6, 129.3, 129.2, 128.7, 116.2, 113.0, 92.9. **HRMS (ESI)**  $m/z$  calcd. for  $C_{21}H_{15}I\text{N}\text{Te}^+$   $[M+H]^+$ :537.9311; Found: 537.9314.

#### 6-Bromo-4-phenyl-3-(phenyltellanyl)quinoline (5ca):

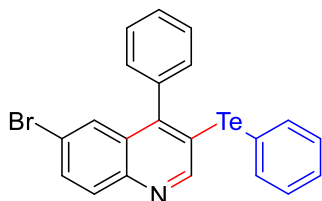

Yellow solid (0.207 g, 85%). Eluent: hexane: ethyl acetate (95:5). mp: 106-113 °C.  **$^1\text{H}$  NMR (400 MHz,  $\text{CDCl}_3$ )**  $\delta$  8.58 (s, 1H), 7.90 (d,  $J = 8.9$  Hz, 1H), 7.86 (d,  $J = 7.0$  Hz, 2H), 7.69 (dd,  $J = 8.9, 2.1$  Hz, 1H), 7.58 (dd,  $J = 6.7, 4.0$  Hz, 4H), 7.45 – 7.38 (m, 1H), 7.31 (dt,  $J = 14.6, 6.0$  Hz, 4H).  **$^{13}\text{C}$  NMR (101 MHz,  $\text{CDCl}_3$ )**  $\delta$  152.87, 148.65, 144.53, 139.74, 137.99, 131.41, 130.14, 129.00, 128.22, 128.18, 128.09, 127.63, 126.72, 119.95, 115.35, 111.95. **HRMS (ESI)**  $m/z$  calcd. for  $C_{21}H_{15}\text{BrN}\text{Te}^+$   $[M+H]^+$ :489.9450; Found: 489.9444.

#### 6-Methyl-4-phenyl-3-(phenyltellanyl)quinoline (5fa):

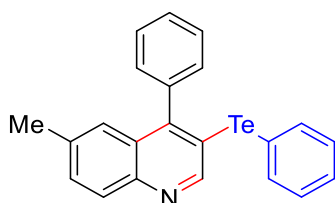

Yellow solid (0.150 g, 71%). Eluent: hexane: ethyl acetate (95:5). mp: 106-110 °C. **<sup>1</sup>H NMR (400 MHz, CDCl<sub>3</sub>)** δ 8.58 (s, 1H), 7.95 (d, *J* = 8.5 Hz, 1H), 7.83 (dd, *J* = 8.0, 1.2 Hz, 2H), 7.56 (dd, *J* = 5.1, 1.9 Hz, 3H), 7.48 (dd, *J* = 8.5, 1.8 Hz, 1H), 7.41 – 7.36 (m, 1H), 7.35 – 7.31 (m, 2H), 7.28 (d, *J* = 7.6 Hz, 1H), 7.19 (s, 1H), 2.40 (s, 3H). **<sup>13</sup>C NMR (101 MHz, CDCl<sub>3</sub>)** δ 153.1, 150.5, 145.7, 140.5, 140.0, 136.9, 131.3, 129.9, 129.2, 129.0, 128.9, 128.85, 128.78, 128.1, 124.6, 114.6, 113.4, 21.8. **HRMS (ESI)** *m/z* calcd. for C<sub>22</sub>H<sub>18</sub>N<sup>+</sup>Te<sup>+</sup> [M+H]<sup>+</sup>:426.0501; Found: 426.0507.

#### 4,8-Diphenyl-3-(phenyltellanyl)quinoline (5ha):

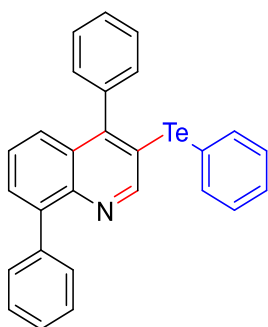

Yellow solid (0.175 g, 72%). Eluent: hexane: ethyl acetate (95:5). mp: 152-155 °C. **<sup>1</sup>H NMR (400 MHz, CDCl<sub>3</sub>)** δ 8.67 (s, 1H), 7.87 (d, *J* = 7.2 Hz, 2H), 7.65 (d, *J* = 6.8 Hz, 3H), 7.58 (d, *J* = 6.1 Hz, 3H), 7.48 (d, *J* = 11.2 Hz, 4H), 7.39 (d, *J* = 5.5 Hz, 4H), 7.28 (s, 1H), 7.23 (s, 1H). **<sup>13</sup>C NMR (101 MHz, CDCl<sub>3</sub>)** δ 153.4, 150.7, 144.8, 141.1, 140.2, 139.7, 130.6, 130.0, 129.9, 129.1, 128.91, 128.87, 128.6, 128.0, 127.4, 126.6, 125.5, 115.0, 113.0. **HRMS (ESI)** *m/z* calcd. for C<sub>22</sub>H<sub>18</sub>NOTe<sup>+</sup> [M+H]<sup>+</sup>: 488.0658; Found:488.0667.

#### 5-Fluoro-4-phenyl-3-(phenyltellanyl)quinoline (5ia):

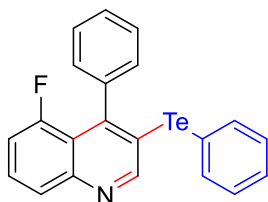

Yellow solid (0.124 g, 58%). Eluent: hexane: ethyl acetate (95:5). mp:64-66 °C **<sup>1</sup>H NMR (400 MHz, CDCl<sub>3</sub>)** δ 8.64 (s, 1H), 7.83 (d, *J* = 7.7 Hz, 2H), 7.67 (d, *J* = 9.8 Hz, 1H), 7.55 (s, 3H), 7.50 – 7.36 (m, 2H), 7.35 – 7.27 (m, 4H), 7.18 (t, *J* = 8.6 Hz, 1H). **<sup>13</sup>C NMR (101 MHz, CDCl<sub>3</sub>)** δ 164.0, 161.5, 155.2, 151.2, 148.1 (d, *J* = 12.5 Hz), 140.5, 139.6, 125.3, 117.2 (d, *J* = 25.0 Hz), 113.2, 113.0 (d, *J* = 20.3 Hz). **<sup>19</sup>F NMR (377 MHz, CDCl<sub>3</sub>)** δ -110.3. **HRMS (ESI)** *m/z* calcd. for C<sub>22</sub>H<sub>18</sub>NOTe<sup>+</sup> [M+H]<sup>+</sup>:430.0251; Found: 430.0254.

### 7-Fluoro-4-phenyl-3-(phenyltellanyl)quinoline (5ia')

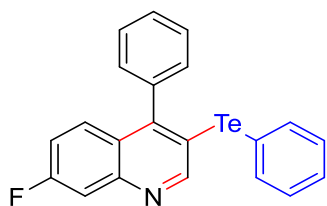

Yellow solid (0.070 g, 33%). Eluent: hexane: ethyl acetate (95:5). mp: 68-74 °C **<sup>1</sup>H NMR (400 MHz, CDCl<sub>3</sub>)** δ 8.50 (s, 1H), 7.92 – 7.84 (m, 3H), 7.59 – 7.54 (m, 1H), 7.54 – 7.50 (m, 3H), 7.43 (ddd, *J* = 8.6, 2.3, 1.2 Hz, 1H), 7.32 (dd, *J* = 12.2, 4.6 Hz, 4H), 7.08 (ddd, *J* = 11.8, 7.8, 0.9 Hz, 1H). **<sup>13</sup>C NMR (101 MHz, CDCl<sub>3</sub>)** δ 157.5 (d, *J* = 258.6 Hz), 153.6, 148.5, 146.8, 142.5, 141.1, 130.1, 129.3, 128.7, 128.6, 128.5 (d, *J* = 9.4 Hz), 125.8 (d, *J* = 4.0 Hz), 118.5 (d, *J* = 9.5 Hz), 118.1, 113.1, 112.1 (d, *J* = 21.7 Hz). **<sup>19</sup>F NMR (377 MHz, CDCl<sub>3</sub>)** δ -108.1. **HRMS (ESI)** *m/z* calcd. for C<sub>22</sub>H<sub>18</sub>NOTe<sup>+</sup> [M+H]<sup>+</sup>:430.0251; Found: 430.0247.

### 6-Methoxy-4-phenyl-3-(phenyltellanyl)quinoline (5ra)

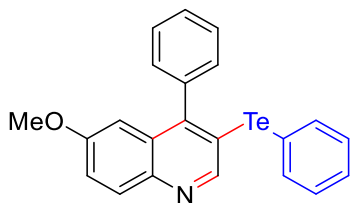

Yellow solid (0.138 g, 63%). Eluent: hexane: ethyl acetate (70:30). mp: 81-85 °C. **<sup>1</sup>H NMR (400 MHz, CDCl<sub>3</sub>)** δ 8.48 (s, 1H), 7.94 (d, *J* = 9.2 Hz, 1H), 7.83 (dd, *J* = 8.0, 1.2 Hz, 2H), 7.59 – 7.51 (m, 3H), 7.41 – 7.36 (m, 1H), 7.35 – 7.32 (m, 2H), 7.31 – 7.25 (m, 3H), 6.69 (d, *J* = 2.8 Hz, 1H), 3.69 (s, 3H). **<sup>13</sup>C NMR (101 MHz, CDCl<sub>3</sub>)** δ 158.0, 151.5, 149.7, 143.2, 140.5, 140.1, 130.9, 129.9, 129.1, 128.9, 128.9, 128.7, 121.3, 115.1, 113.4, 103.8, 55.4. **HRMS (ESI)** *m/z* calcd. for C<sub>22</sub>H<sub>18</sub>NOTe<sup>+</sup> [M+H]<sup>+</sup>:442.0451; Found: 442.0456.

### 2-Methyl-4-phenyl-3-(phenyltellanyl)quinoline (5ka)

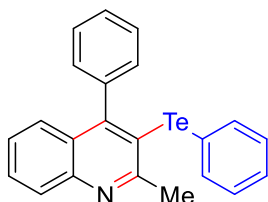

Yellow solid (0.120 g, 57%). Eluent: hexane: ethyl acetate (95:5). mp: 144-148 °C. **<sup>1</sup>H NMR (400 MHz, CDCl<sub>3</sub>)** δ 8.06 (d, *J* = 8.4 Hz, 1H), 7.72 – 7.65 (m, 1H), 7.46 (d, *J* = 6.2 Hz, 3H), 7.41 – 7.31 (m, 4H), 7.23 – 7.14 (m, 3H), 7.10 (t, *J* = 7.4 Hz, 2H), 2.97 (s, 3H). **<sup>13</sup>C NMR (101 MHz, CDCl<sub>3</sub>)**

$\delta$  163.0, 157.4, 147.7, 142.2, 136.1, 130.0, 129.5, 129.1, 128.5, 128.3, 128.1, 127.4, 126.2, 126.1, 116.8, 115.5, 29.7. **HRMS (ESI)**  $m/z$  calcd. for  $C_{22}H_{18}NO^{Te^+}$   $[M+H]^+$ : 426.0501; Found: 426.0506.

#### 4-(4-Methoxyphenyl)-3-(phenyltellanyl)quinoline (5na):

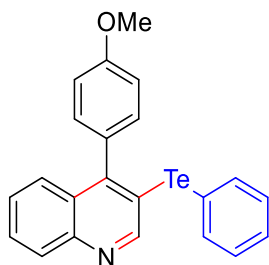

Yellow solid. (0.172 g, 78%). Eluent: hexane: ethyl acetate (95:5). mp: 74-77 °C.  **$^1H$  NMR (400 MHz,  $CDCl_3$ )**  $\delta$  8.62 (s, 1H), 8.05 (d,  $J = 8.3$  Hz, 1H), 7.89 – 7.83 (m, 2H), 7.63 (ddd,  $J = 8.3, 6.8, 1.4$  Hz, 1H), 7.51 (dd,  $J = 8.5, 0.9$  Hz, 1H), 7.42 – 7.37 (m, 2H), 7.31 – 7.26 (m, 4H), 7.10 – 7.06 (m, 2H), 3.91 (s, 3H).  **$^{13}C$  NMR (101 MHz,  $CDCl_3$ )**  $\delta$  160.0, 153.8, 150.8, 147.1, 140.6, 132.0, 130.1, 130.0, 129.4, 129.0, 128.5, 126.9, 125.8, 115.3, 114.4, 113.5, 55.4. **HRMS (ESI)**  $m/z$  calcd. for  $C_{22}H_{18}NO^{Te^+}$   $[M+H]^+$ : 442.0451; Found: 442.0455.

#### 4-(3-Bromophenyl)-3-(phenyltellanyl)quinoline (5sa):

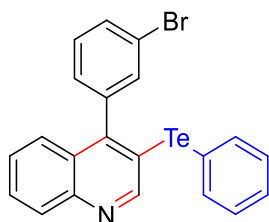

Brown liquid (0.205 g, 84%). Eluent: hexane: ethyl acetate (95:5).  **$^1H$  NMR (400 MHz,  $CDCl_3$ )**  $\delta$  8.71 (s, 1H), 8.05 (d,  $J = 8.4$  Hz, 1H), 7.81 (dd,  $J = 8.0, 1.2$  Hz, 2H), 7.70 – 7.62 (m, 2H), 7.46 – 7.43 (m, 2H), 7.42 (d,  $J = 2.3$  Hz, 2H), 7.40 (d,  $J = 3.3$  Hz, 1H), 7.29 (d,  $J = 7.6$  Hz, 2H).  **$^{13}C$  NMR (101 MHz,  $CDCl_3$ )**  $\delta$  154.4, 149.7, 147.1, 141.7, 140.5, 140.4, 131.93, 131.87, 130.5, 130.0, 129.6, 129.3, 129.1, 127.6, 127.2, 125.5, 123.0, 114.4, 113.2. **HRMS (ESI)**  $m/z$  calcd. for  $C_{22}H_{18}NO^{Te^+}$   $[M+H]^+$ : 489.9450 ; Found: 489.9443.

#### 4-Phenyl-3-(phenylseleninyl)quinoline (6):

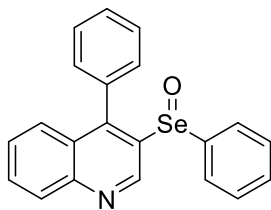

Yellow solid. (0.073 g, 70%). Eluent: DCM: methanol (95:5). mp: 71-73 °C. **<sup>1</sup>H NMR (400 MHz, CDCl<sub>3</sub>)** δ 9.50 (s, 1H), 8.20 (d, *J* = 6.8 Hz, 1H), 7.77 (t, *J* = 6.5 Hz, 1H), 7.68 – 7.43 (m, 7H), 7.33 (s, 4H), 6.97 (d, *J* = 7.4 Hz, 1H). **<sup>13</sup>C NMR (101 MHz, CDCl<sub>3</sub>)** δ 149.2, 148.9, 146.3, 133.7, 131.5, 131.2, 130.3, 130.0, 129.8, 129.6, 129.5, 128.8, 127.8, 126.8, 126.3. **<sup>77</sup>Se NMR (76 MHz, CDCl<sub>3</sub>)** δ 649.68. **HRMS (ESI)** *m/z* calcd. for C<sub>21</sub>H<sub>16</sub>NOSe<sup>+</sup> [M+H]<sup>+</sup>: 394.0346; Found: 394.0352.

#### 4-Phenyl-3-(phenylselenenyl)quinoline 1-oxide (7):

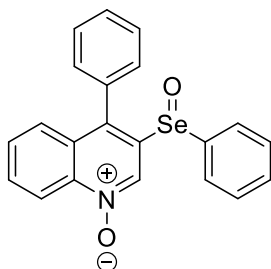

Yellow solid. (0.152 g, 70%). Eluent: DCM: methanol (90:10). mp: 124-127 °C. **<sup>1</sup>H NMR (400 MHz, CDCl<sub>3</sub>)** δ 9.14 (s, 1H), 8.82 (d, *J* = 8.8 Hz, 1H), 7.84 – 7.79 (m, 1H), 7.69 (td, *J* = 7.5, 1.0 Hz, 1H), 7.64 (dt, *J* = 7.4, 1.3 Hz, 1H), 7.61 – 7.56 (m, 3H), 7.50 (td, *J* = 7.7, 1.3 Hz, 1H), 7.42 – 7.38 (m, 1H), 7.36 – 7.31 (m, 2H), 7.25 (s, 1H), 7.23 (d, *J* = 1.4 Hz, 1H), 6.97 (d, *J* = 7.7 Hz, 1H). **<sup>13</sup>C NMR (101 MHz, CDCl<sub>3</sub>)** δ 142.7, 141.3, 137.5, 135.4, 133.0, 131.8, 131.6, 131.2, 130.9, 130.0, 129.9, 129.73, 129.69, 129.0, 128.9, 127.1, 126.4, 120.2. **<sup>77</sup>Se NMR (76 MHz, CDCl<sub>3</sub>)** δ 845.5. **HRMS (ESI)** *m/z* calcd. for C<sub>21</sub>H<sub>16</sub>NO<sub>2</sub>Se<sup>+</sup> [M+H]<sup>+</sup>: 378.0397; Found: 378.0401.

#### 4-Phenyl-3-(phenylselenenyl)-2-(piperidin-1-yl)quinoline 1-oxide (8):

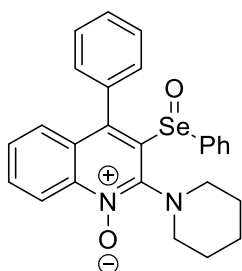



Brown solid (0.120 g, 67%). Eluent: DCM: methanol (90:10). mp: 84-87 °C,  $^1\text{H}$  NMR (400 MHz,  $\text{CDCl}_3$ )  $\delta$  8.75 (d,  $J = 8.3$  Hz, 1H), 7.82 – 7.74 (m, 1H), 7.51 – 7.44 (m, 3H), 7.42 – 7.33 (m, 7H), 7.15 (t,  $J = 7.5$  Hz, 1H), 6.68 (d,  $J = 7.6$  Hz, 1H), 3.48 (dd,  $J = 40.5, 5.6$  Hz, 4H), 1.65 (s, 6H).  $^{13}\text{C}$  NMR (101 MHz,  $\text{CDCl}_3$ )  $\delta$  150.1, 143.4, 142.8, 131.7, 131.5, 131.4, 130.5, 129.9, 129.3, 129.1, 128.6, 128.4, 127.6, 127.6, 127.4, 126.4, 119.3, 5., 25.2, 23.6.

**4-Phenyl-3-(phenylselanyl)-2-(piperidin-1-yl)quinoline (9):**

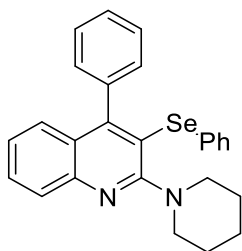

Golden yellow solid (0.060 g, 54%). Eluent: hexane: ethyl acetate (40:60). mp: 106-108 °C.  $^1\text{H}$  NMR (400 MHz,  $\text{CDCl}_3$ )  $\delta$  7.90 (dd,  $J = 8.4, 0.6$  Hz, 1H), 7.59 (ddd,  $J = 8.4, 6.8, 1.6$  Hz, 1H), 7.42 – 7.34 (m, 3H), 7.29 (dd,  $J = 8.3, 1.0$  Hz, 1H), 7.21 (ddd,  $J = 8.3, 6.8, 1.2$  Hz, 1H), 7.15 – 7.11 (m, 2H), 7.10 – 7.01 (m, 3H), 7.01 – 6.96 (m, 2H), 3.39 (s, 4H), 1.54 (s, 6H).  $^{13}\text{C}$  NMR (101 MHz,  $\text{CDCl}_3$ )  $\delta$  162.5, 156.1, 147.1, 139.3, 133.7, 130.4, 129.7, 129.6, 128.6, 127.9, 127.7, 127.6, 126.7, 126.0, 125.7, 124.0, 120.5, 51.8, 25.6, 24.5.  $^{77}\text{Se}$  NMR (76 MHz,  $\text{CDCl}_3$ )  $\delta$  363.1.

**(2,2-diphenylvinyl)(phenyl)selane (10):**

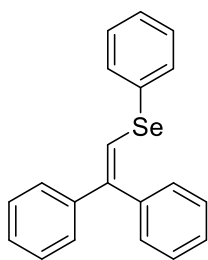

White solid.  $^1\text{H}$  NMR (400 MHz,  $\text{CDCl}_3$ )  $\delta$  7.61 – 7.56 (m, 2H), 7.43 (dd,  $J = 7.0, 1.2$  Hz, 2H), 7.38 (dt,  $J = 5.4, 2.2$  Hz, 1H), 7.36 – 7.30 (m, 6H), 7.29 – 7.26 (m, 2H), 7.24 – 7.19 (m, 4H), 7.13 (s, 1H).

**(Z)-N,3-diphenylprop-2-yn-1-imine (11):**

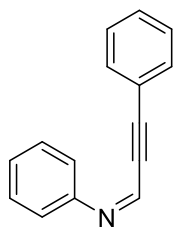

Yellow liquid.  $^1\text{H NMR}$  (400 MHz,  $\text{CDCl}_3$ )  $\delta$  7.89 (s, 1H), 7.57 – 7.55 (m, 2H), 7.38 – 7.30 (m, 6H), 7.25 – 7.21 (m, 1H), 7.19 – 7.15 (m, 2H).  $^{13}\text{C NMR}$  (101 MHz,  $\text{CDCl}_3$ )  $\delta$  151.0, 143.7, 132.5, 129.9, 129.3, 128.6, 128.5, 127.3, 120.9, 94.9, 87.6.

## 10. References

1. X. Zhang, M.A. Campo, T. Yao, R.C. Larock, Synthesis of Substituted Quinolines by Electrophilic Cyclization of N-(2-Alkynyl)anilines. *Org. Lett.*, 2005, **7**, 763–766.
2. C. Zhu, M. Nurko, C. S. Day, J. C. Lukesh. Arylselenyl Radical-Mediated Cyclization of N-(2-Alkynyl)anilines: Access to 3-Selenylquinolines. *J. Org. Chem.*, 2022, **87**, 8390–8395.
3. G. Wang, T. Chen, K. Jia, W. Ma, C. Tung, L. Liu, Catalytic Asymmetric Oxidation of Amines to Hydroxylamines. *J. Am. Chem. Soc.*, 2023, **145**, 22276–22283.
4. A. Sharifi, M. Mirzaei, M. R. N. Jamal, A facile solvent-free one-pot three-component Mannich reaction of aldehydes, amines and terminal alkynes catalysed by  $\text{CuCl}_2$ . *J. Chem. Res.*, 2007, 129–132
5. D. Singh, A.M. Deobald, L.R.S. Camargo, G. Tabarelli, O.E.D. Rodrigues, A.L. Braga, An Efficient One-Pot Synthesis of Symmetrical Diselenides or Ditellurides from Halides with  $\text{CuO}$  Nanopowder/ $\text{Se}^0$  or  $\text{Te}^0$ /Base. *Org. Lett.*, 2010, **15**, 3288–3291.
6. A. N. V. Satyanarayana, N. Mukherjee, T. Chatterjee, 100% atom-economical and highly regio- and stereoselective iodosulfenylation of alkynes: a reagentless and sustainable approach to access (E)- $\beta$ -iodoalkenyl sulfides and (Z)-tamoxifen. *Green Chem.*, 2023, **25**, 779.
7. C. Zhu, M. Yi, D. Wei, X. Chen, T. Wu, X. Cui, Copper-Catalyzed Direct Amination of Quinoline N-Oxides via C–H Bond Activation under Mild Conditions. *Org. Lett.*, 2014, **16**, 1840–1843.
8. H. Hwang, J. Kim, J. Jeong, S. Chang, Regioselective Introduction of Heteroatoms at the C-8 Position of Quinoline N-Oxides: Remote C–H Activation Using N-Oxide as a Stepping Stone. *J. Am. Chem. Soc.*, 2014, **136**, 10770–10776.

9. H. Sahoo, A. Mandal, J. Selvakumar, M. Baidya, Remote C–H Selenylation of 8-Amidoquinolines via Copper-Catalyzed Radical Cross-Coupling. *Eur. J. Org. Chem.*, 2016, **2016**, 4321-4327.
10. H. Tian, X. Yu, Q. Li, J. Wang, Q. Xu. General, Green, and Scalable Synthesis of Imines from Alcohols and Amines by a Mild and Efficient Copper-Catalyzed Aerobic Oxidative Reaction in Open Air at Room Temperature. *Adv. Synth. Catal.*, 2012, **354**, 2671-2677.

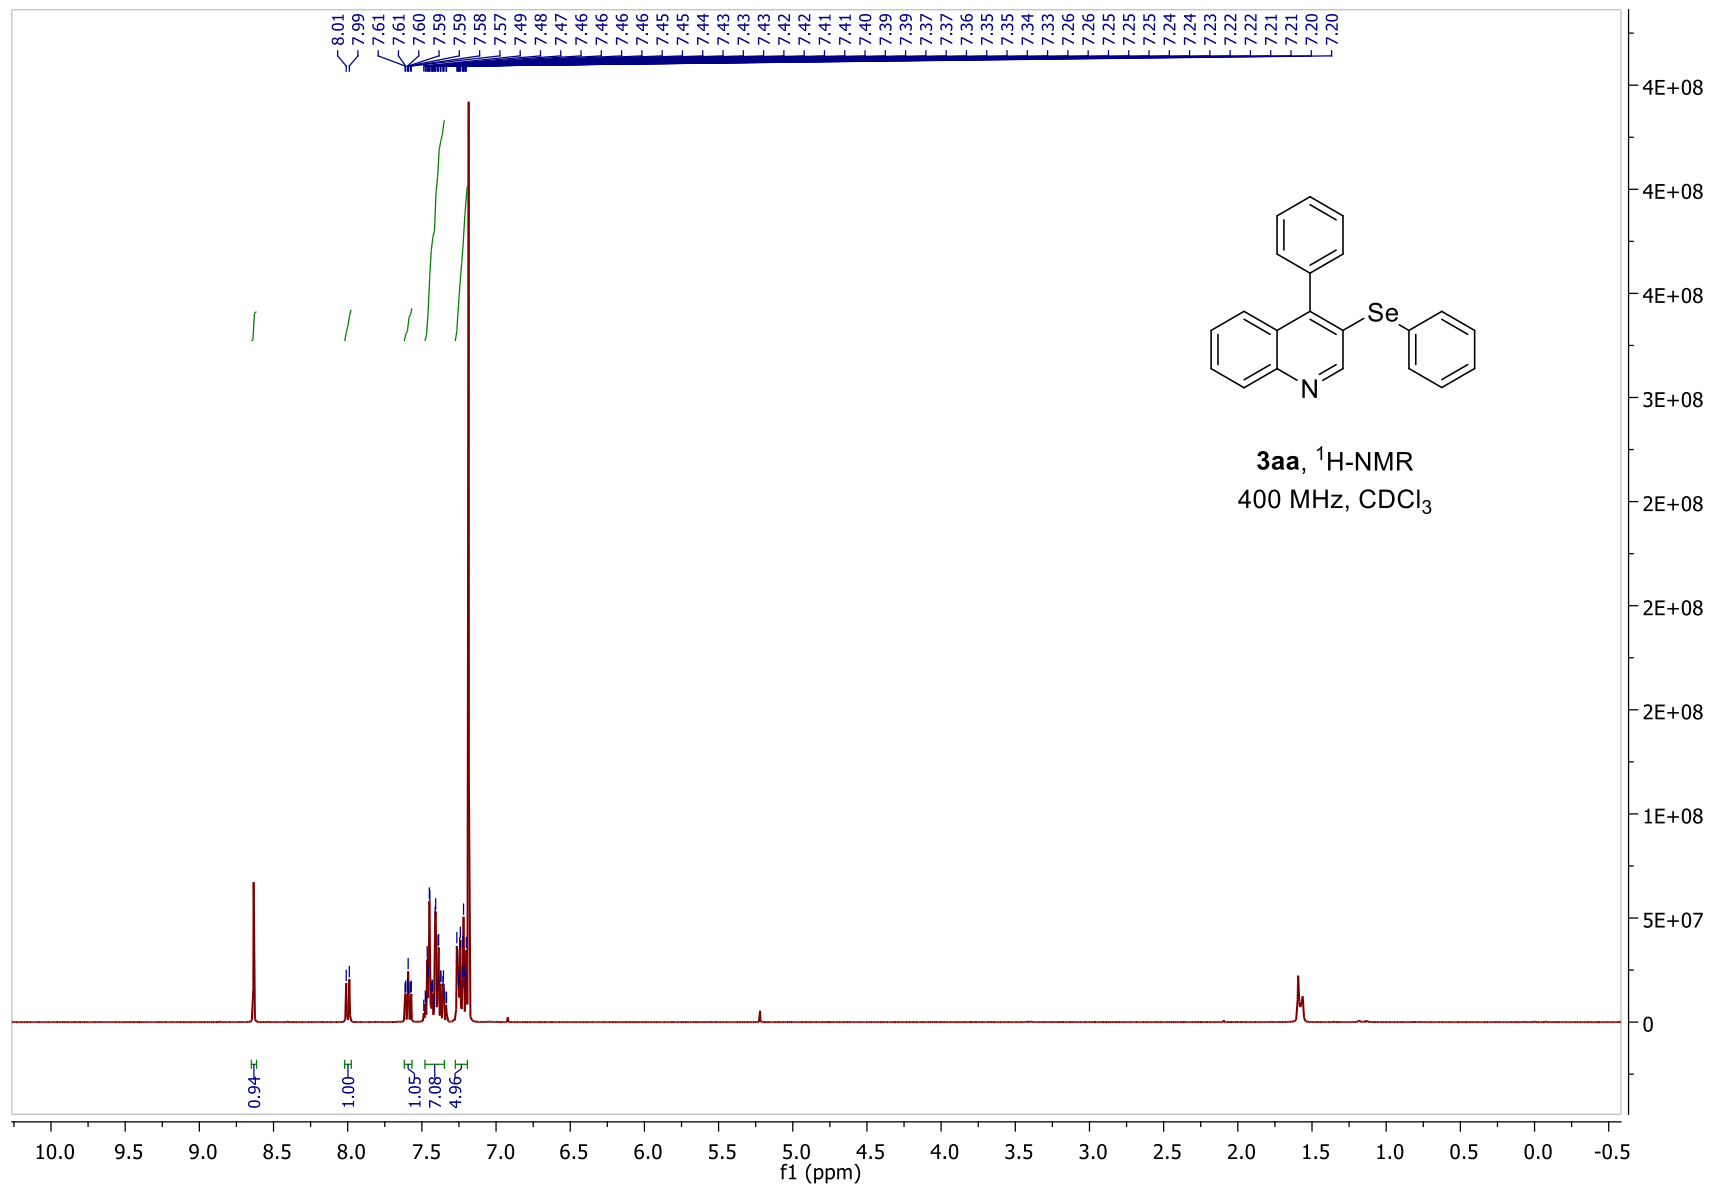

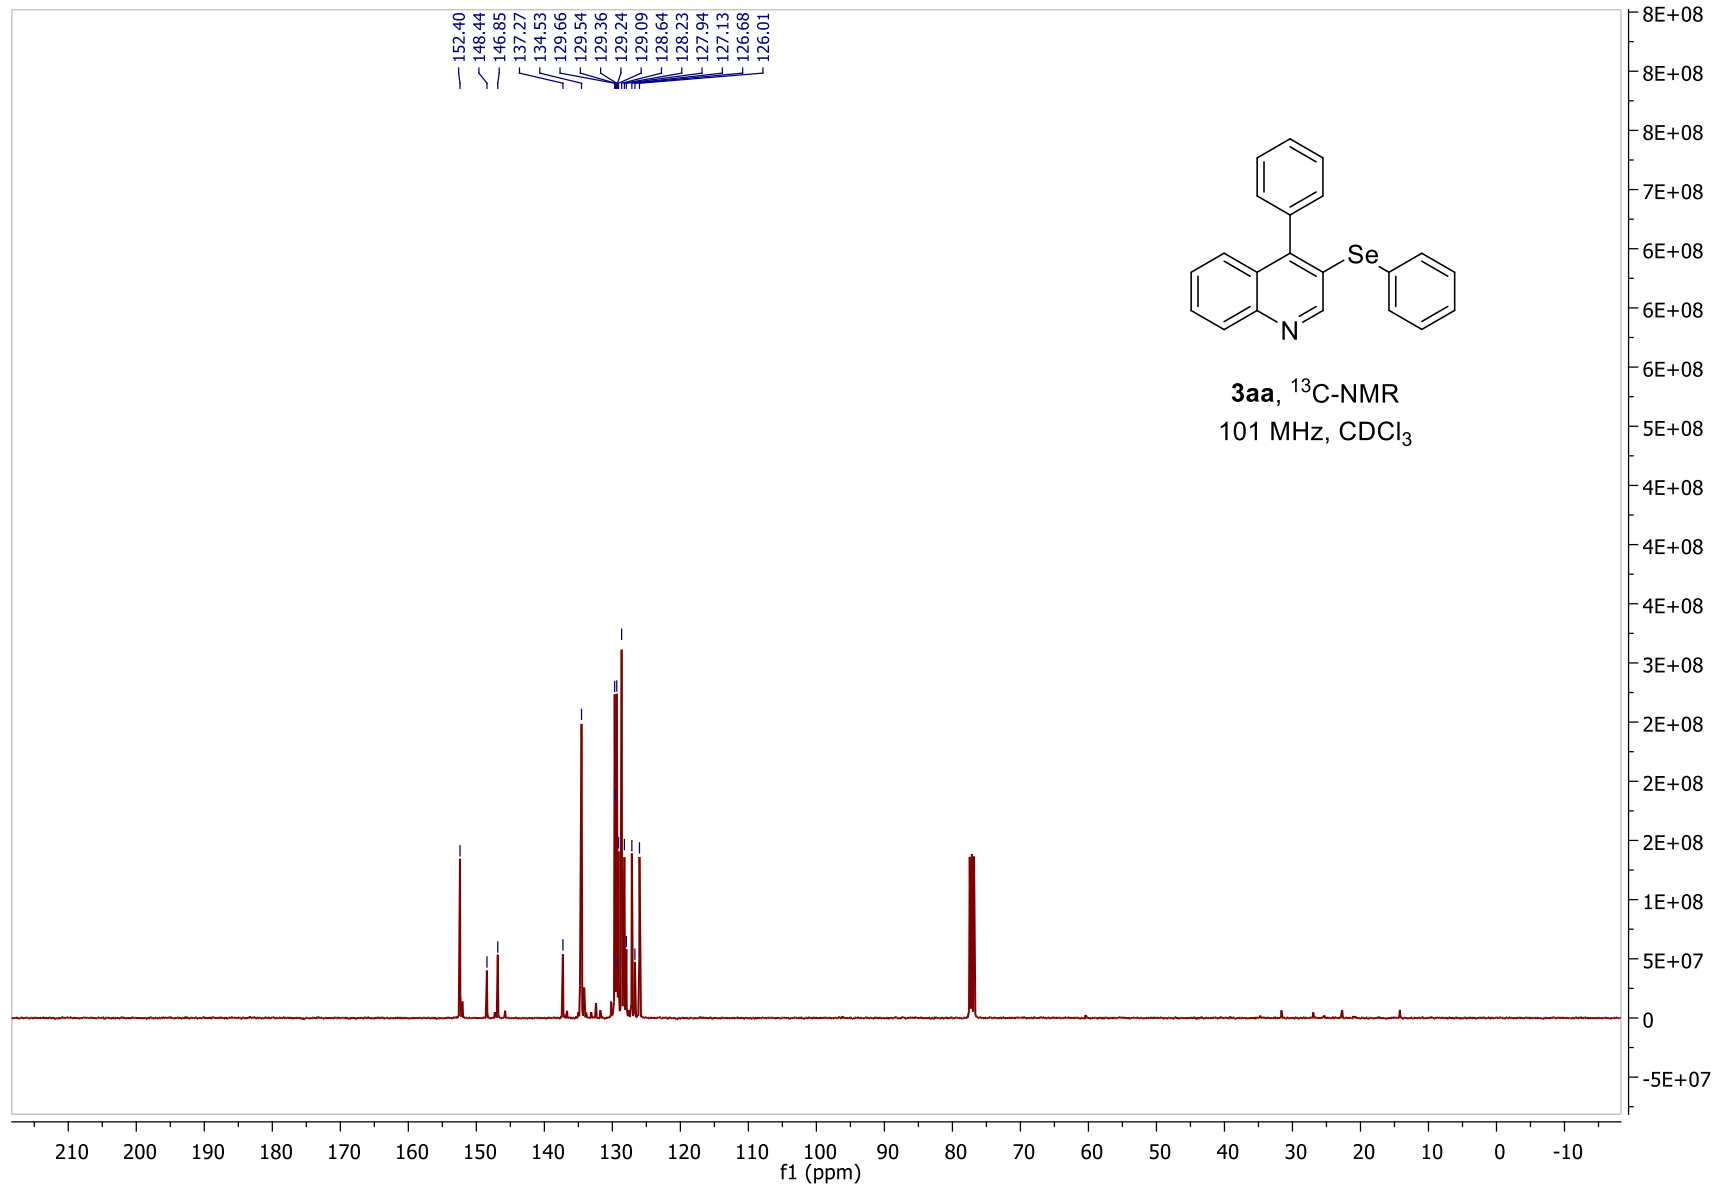

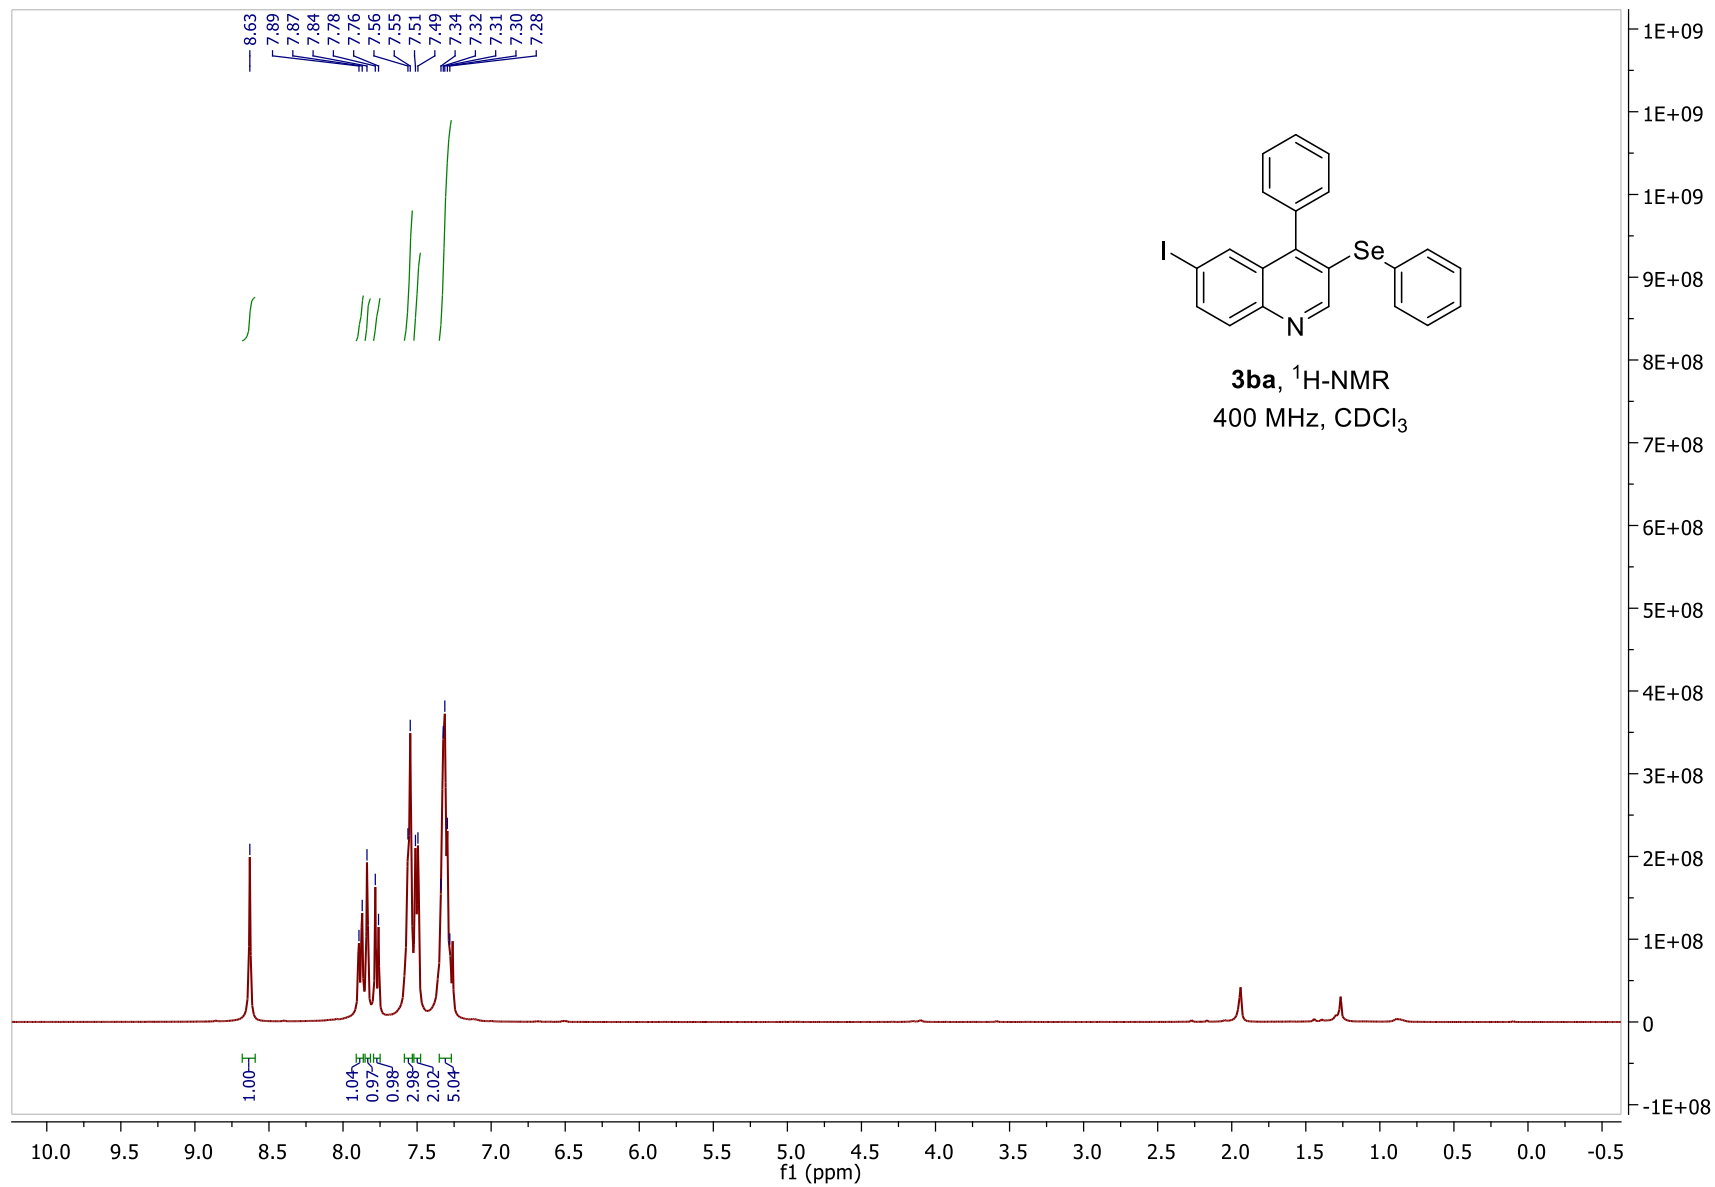

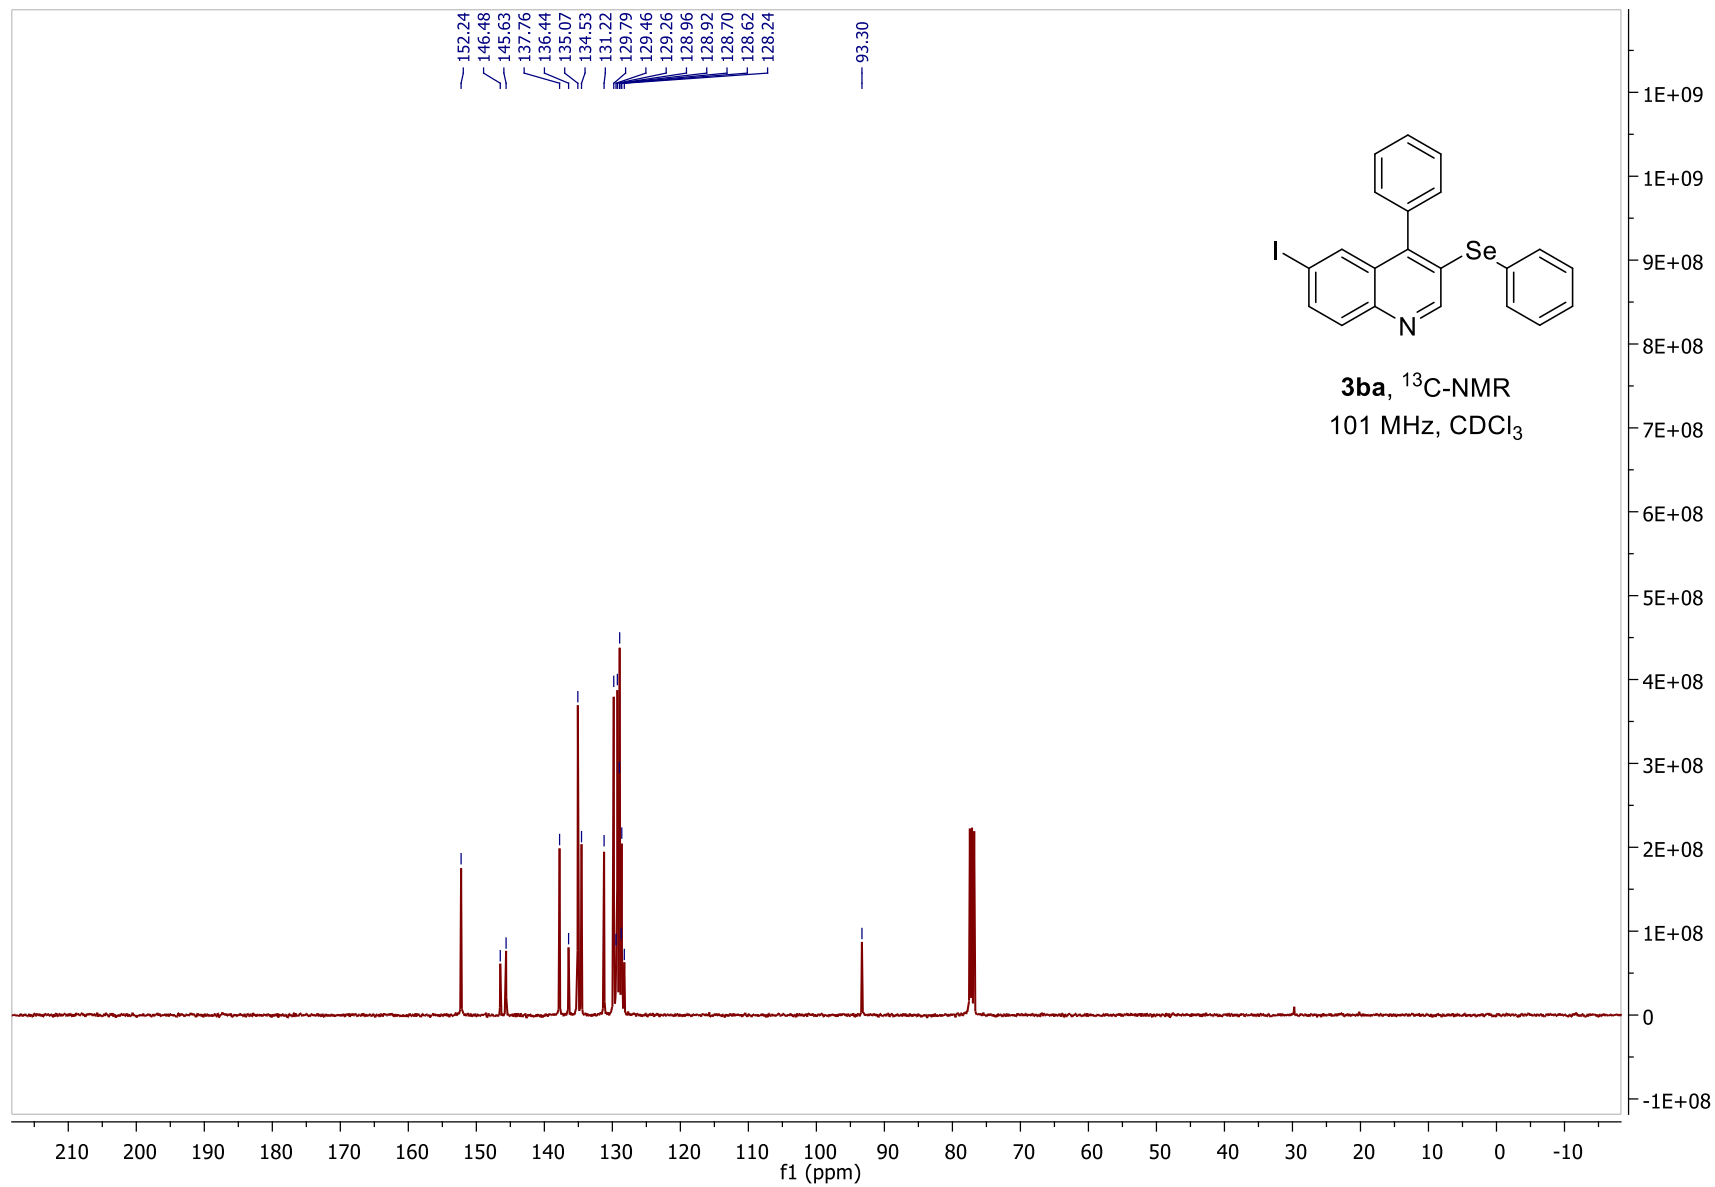

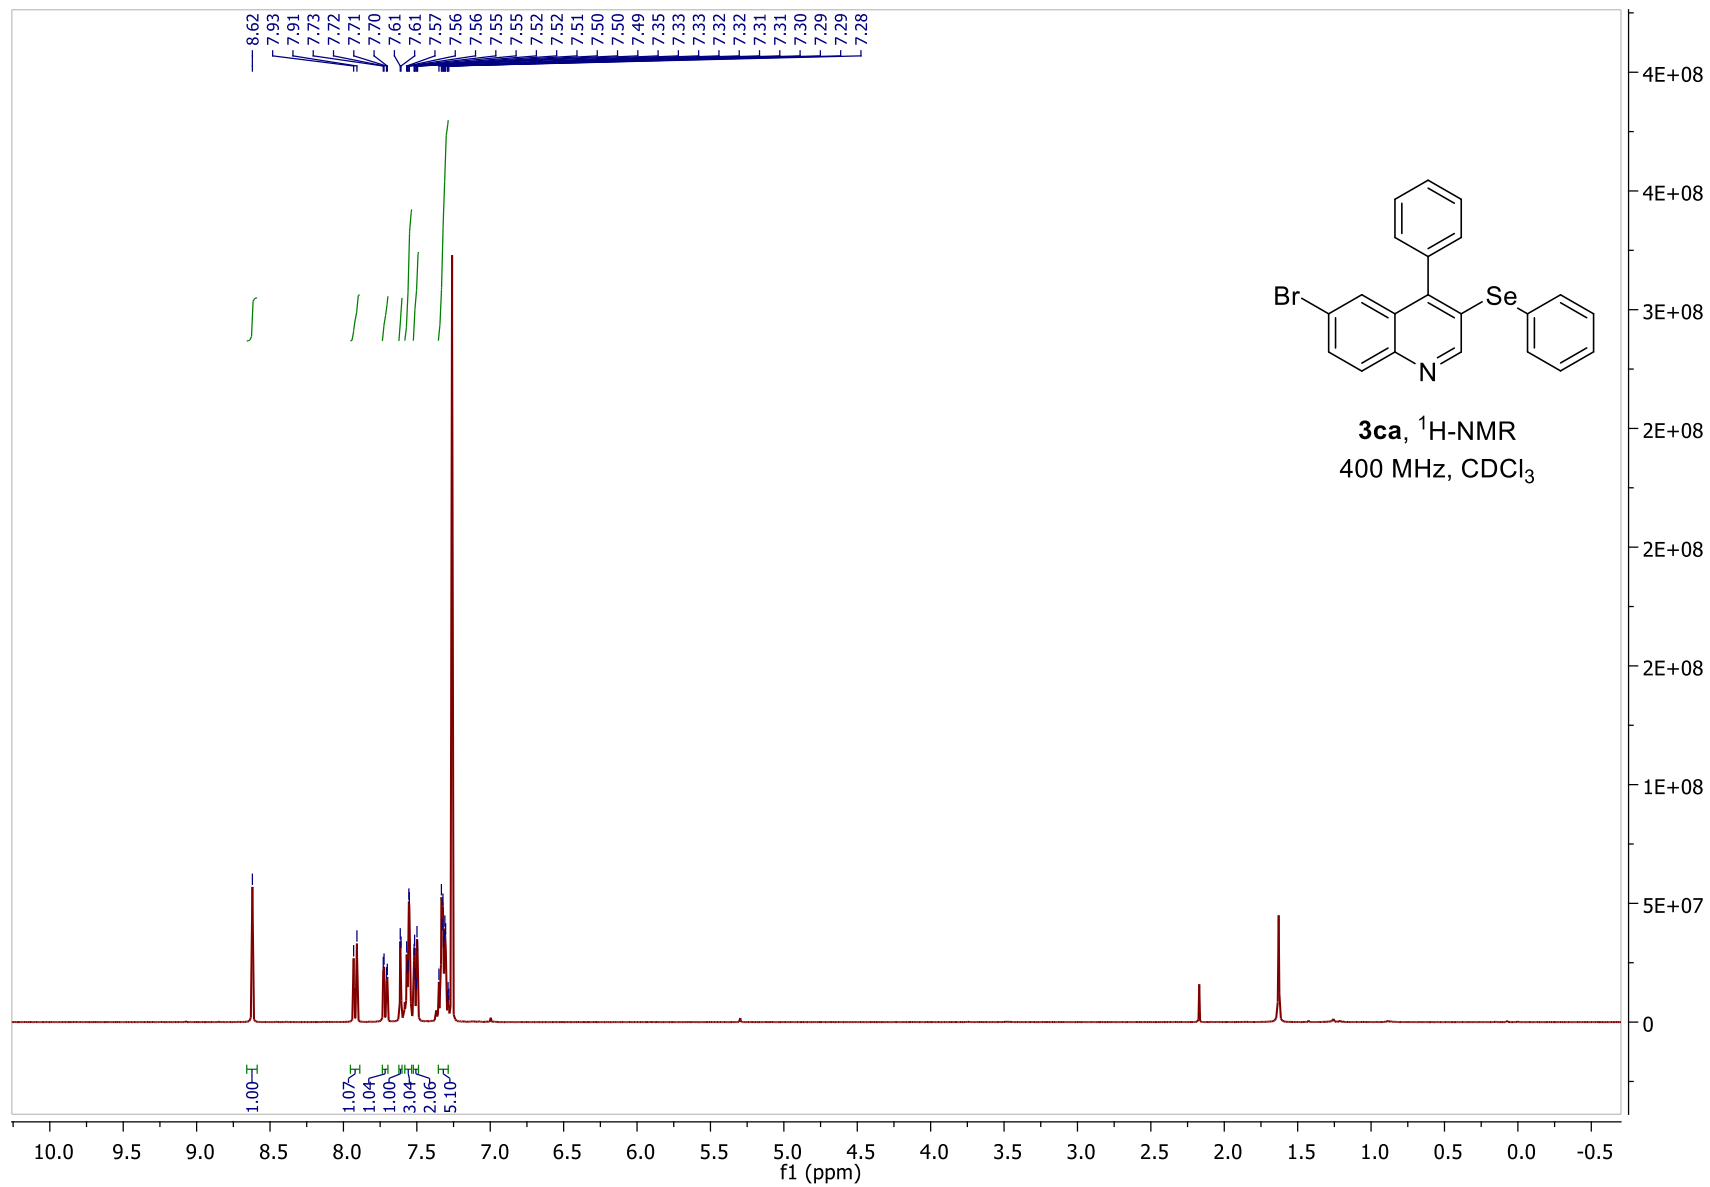



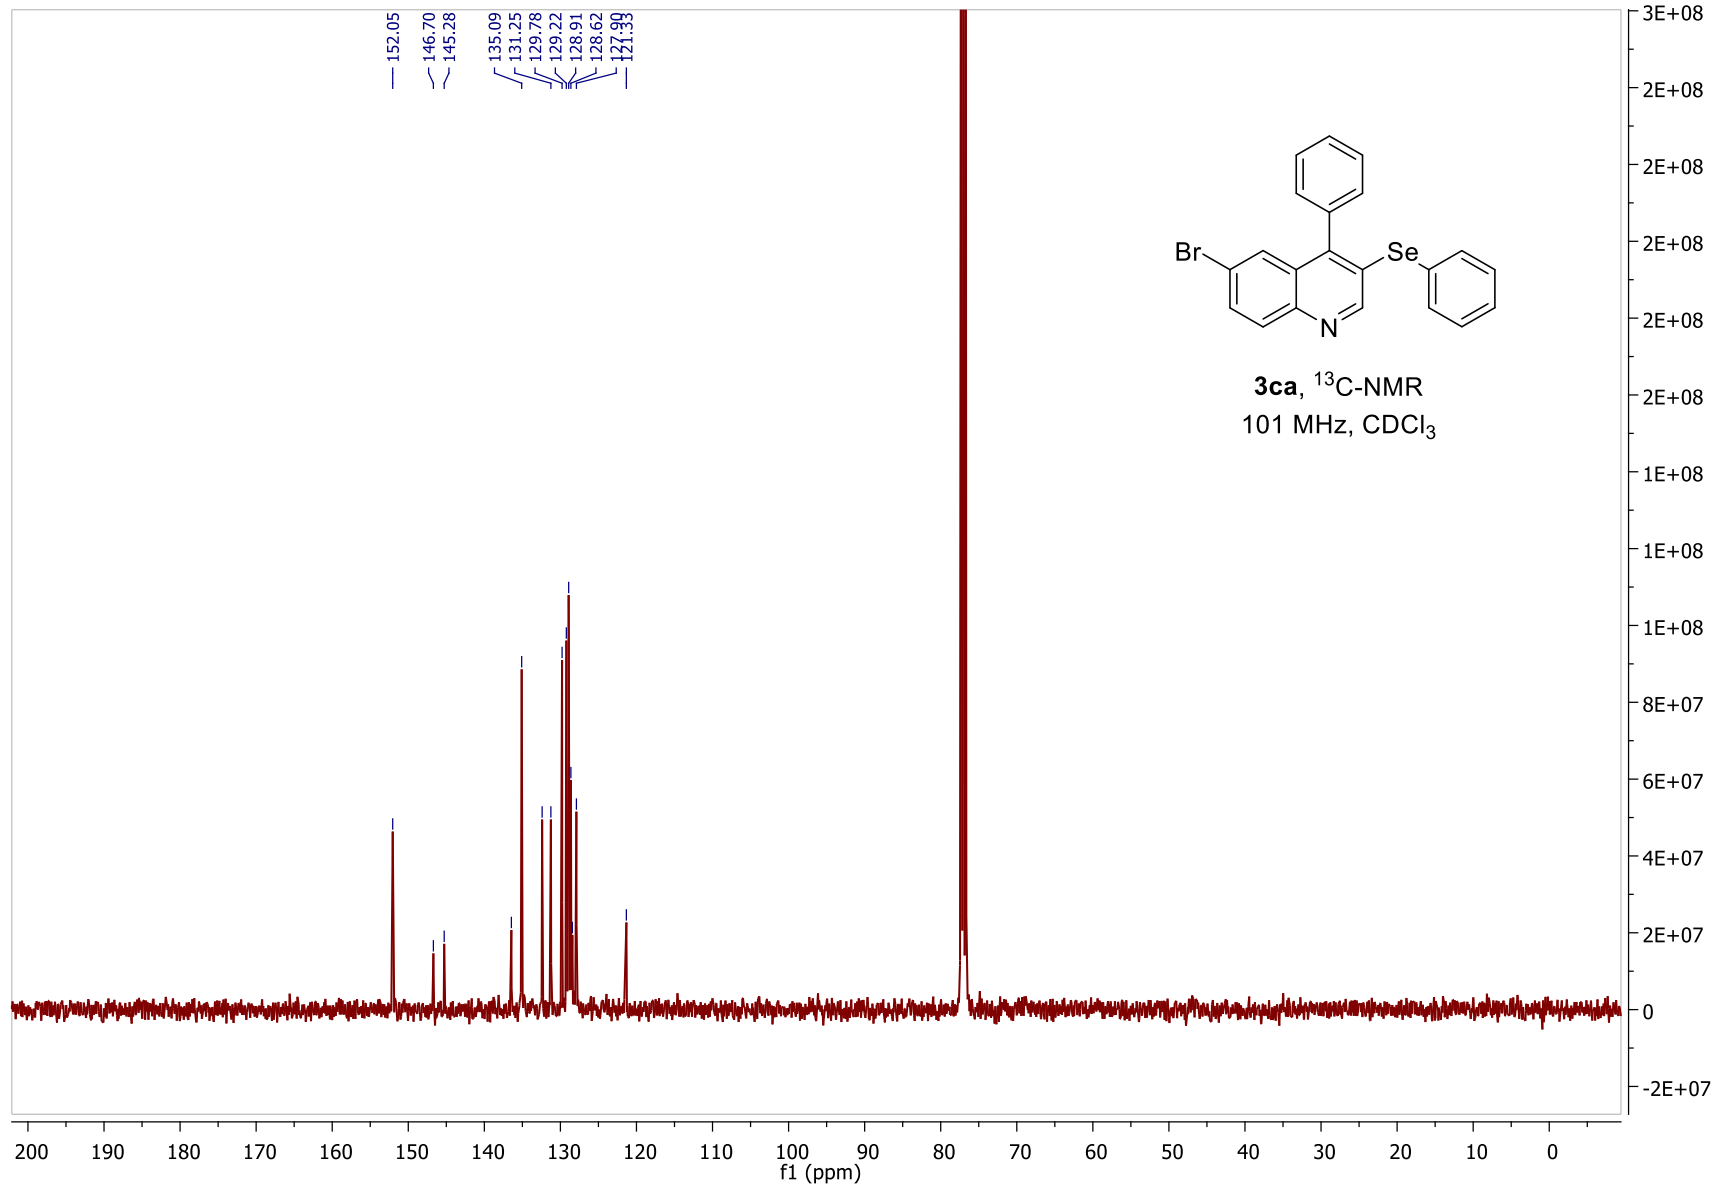

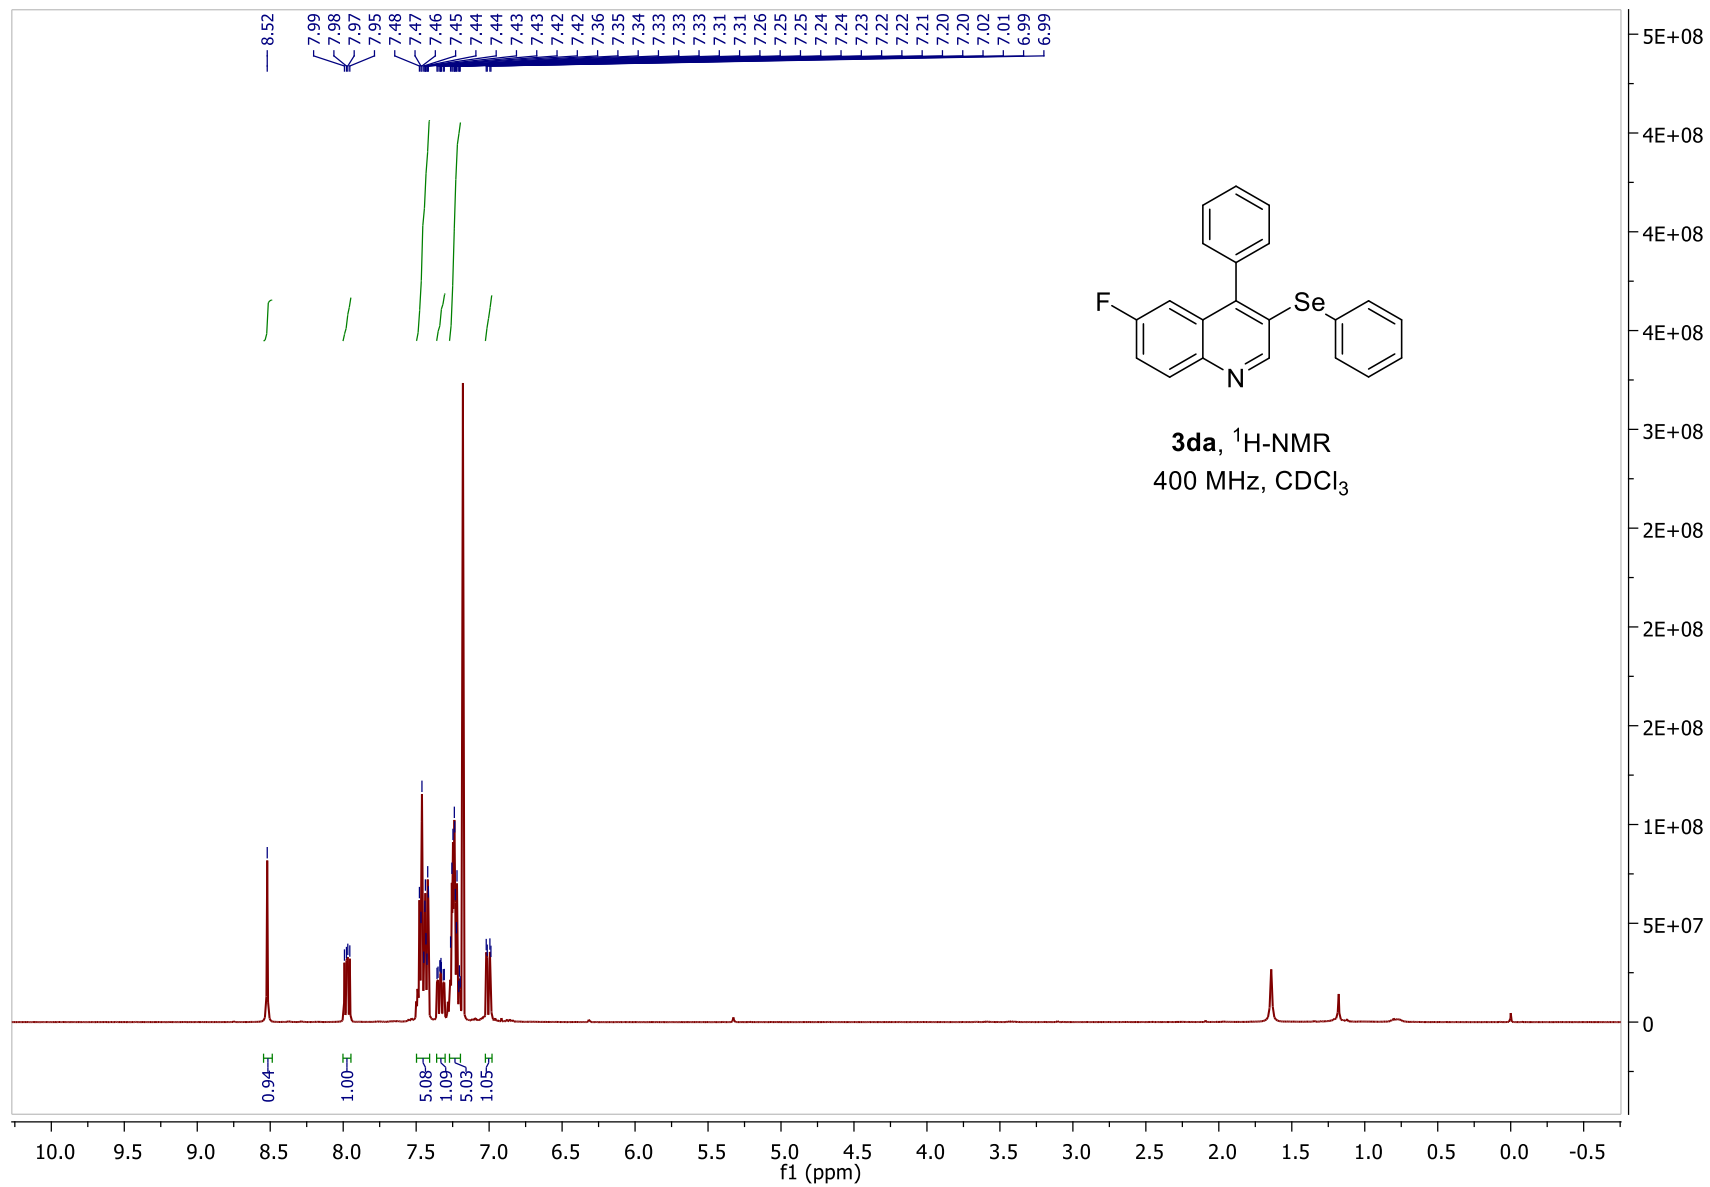

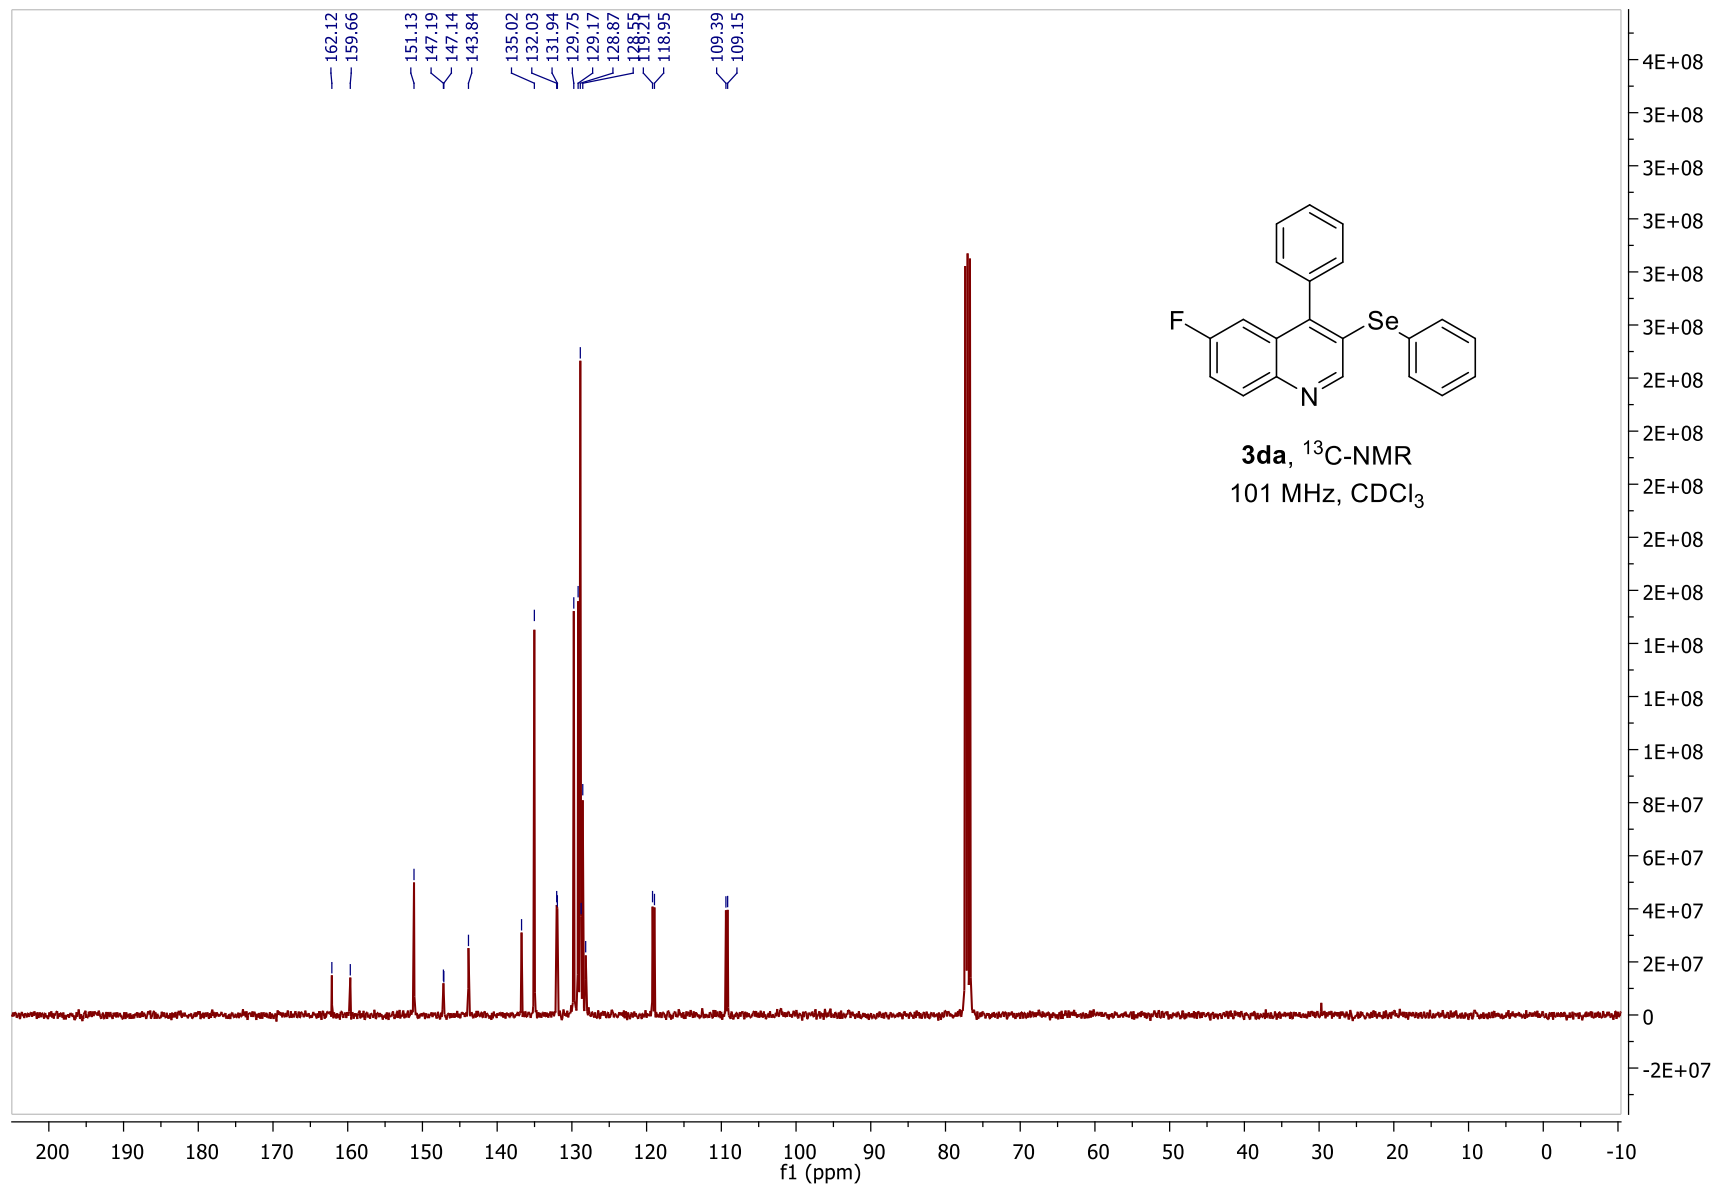

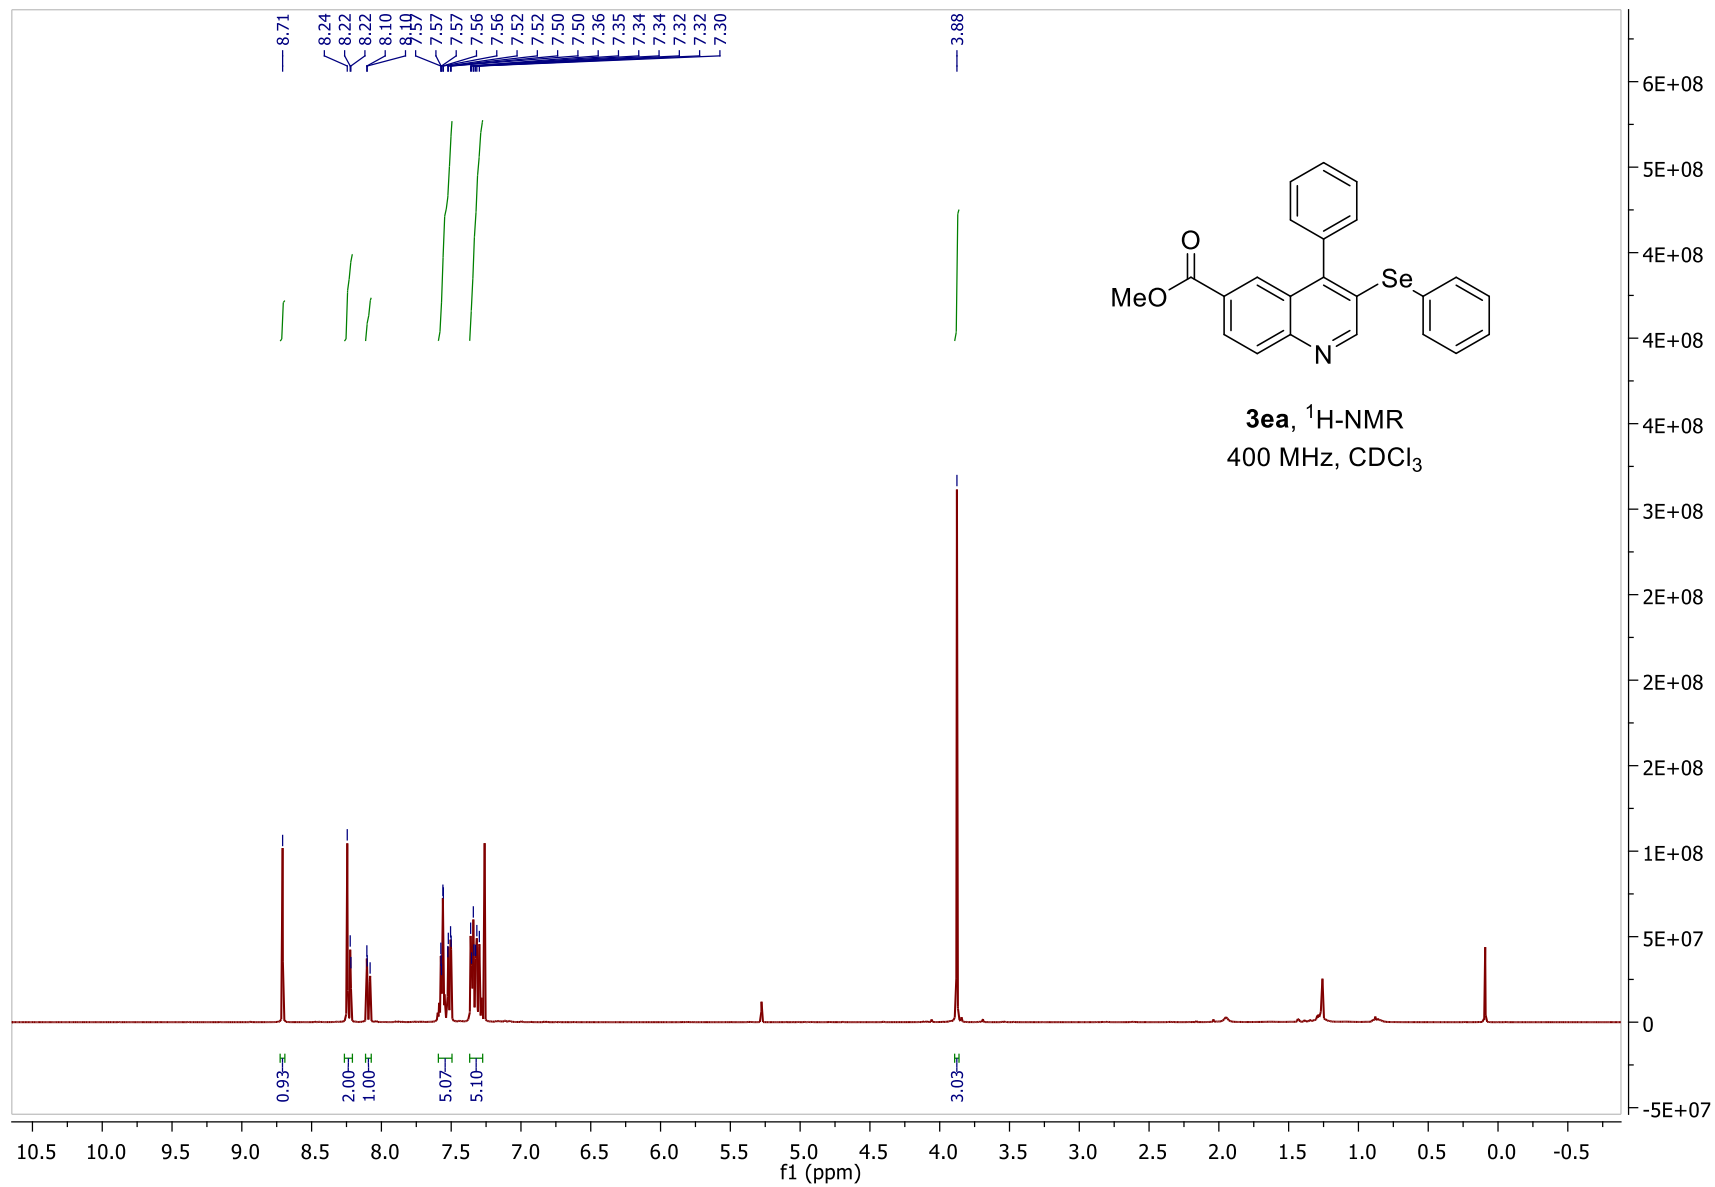

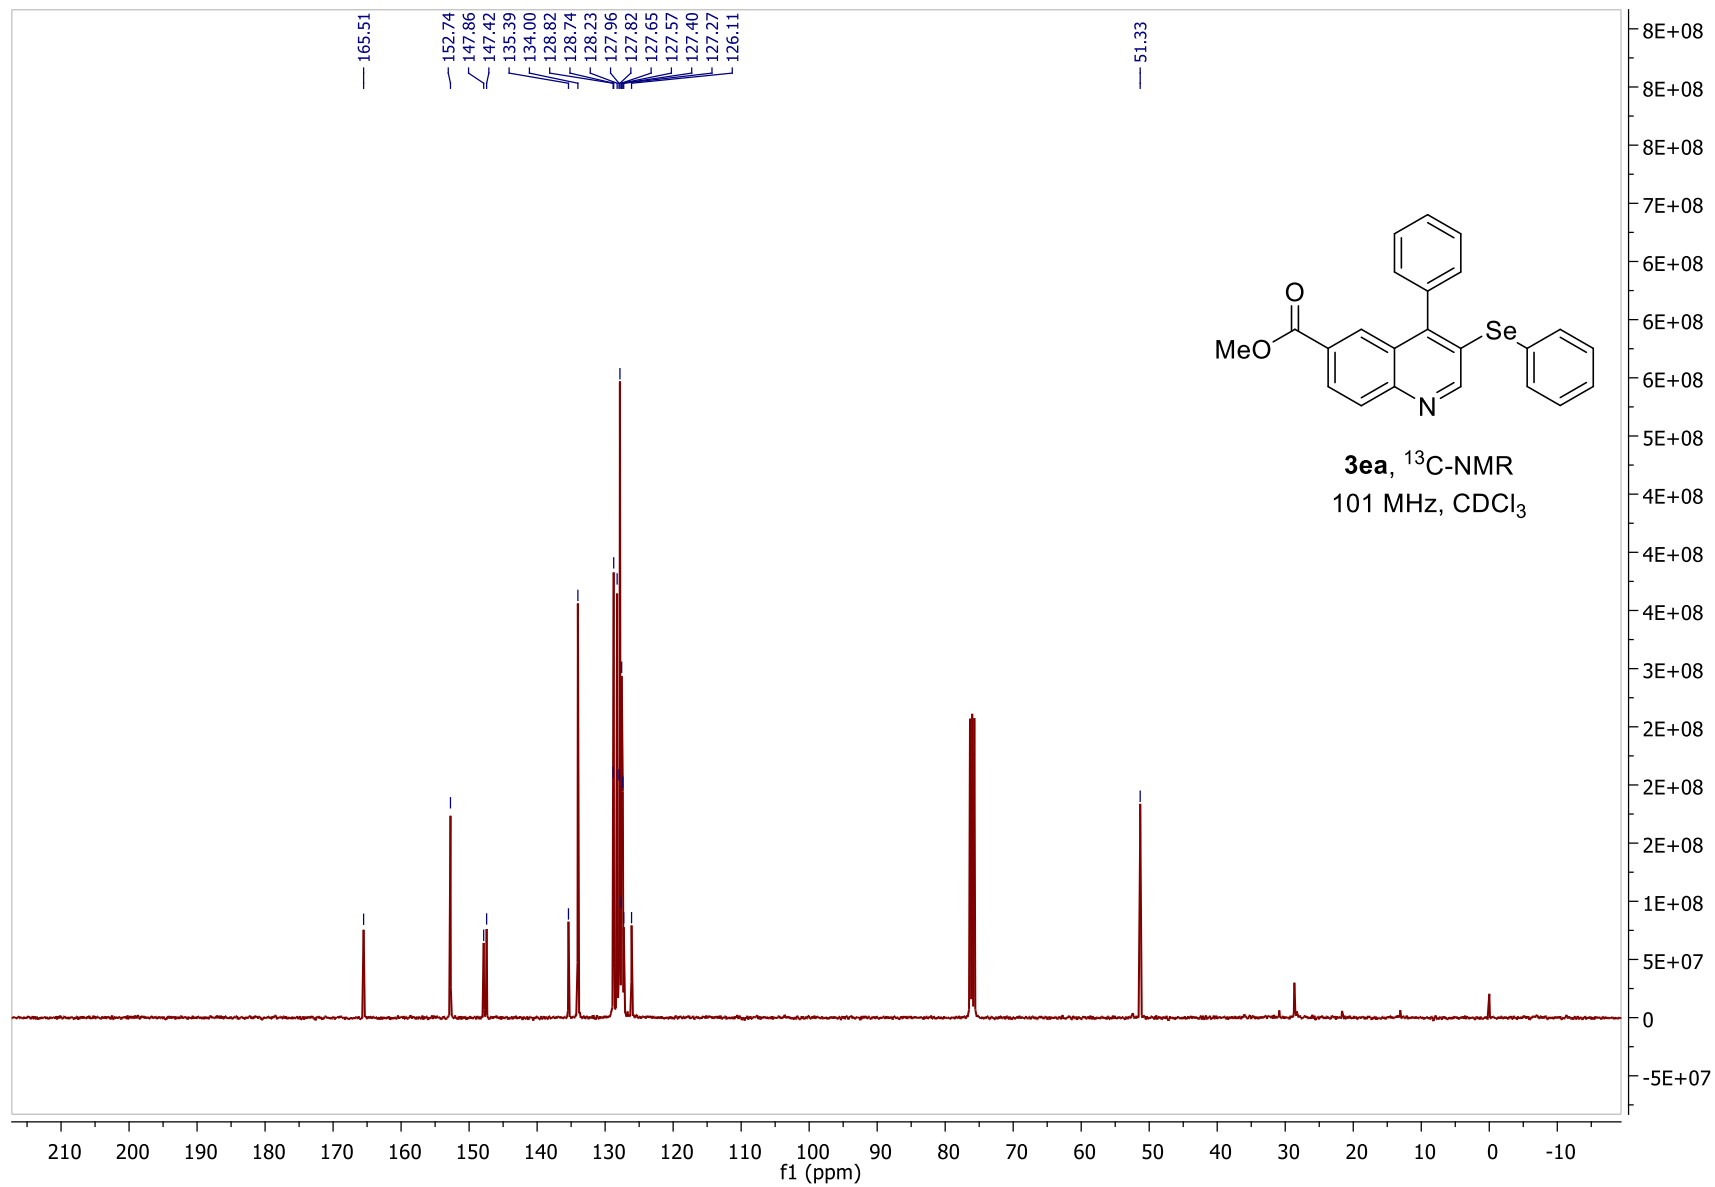

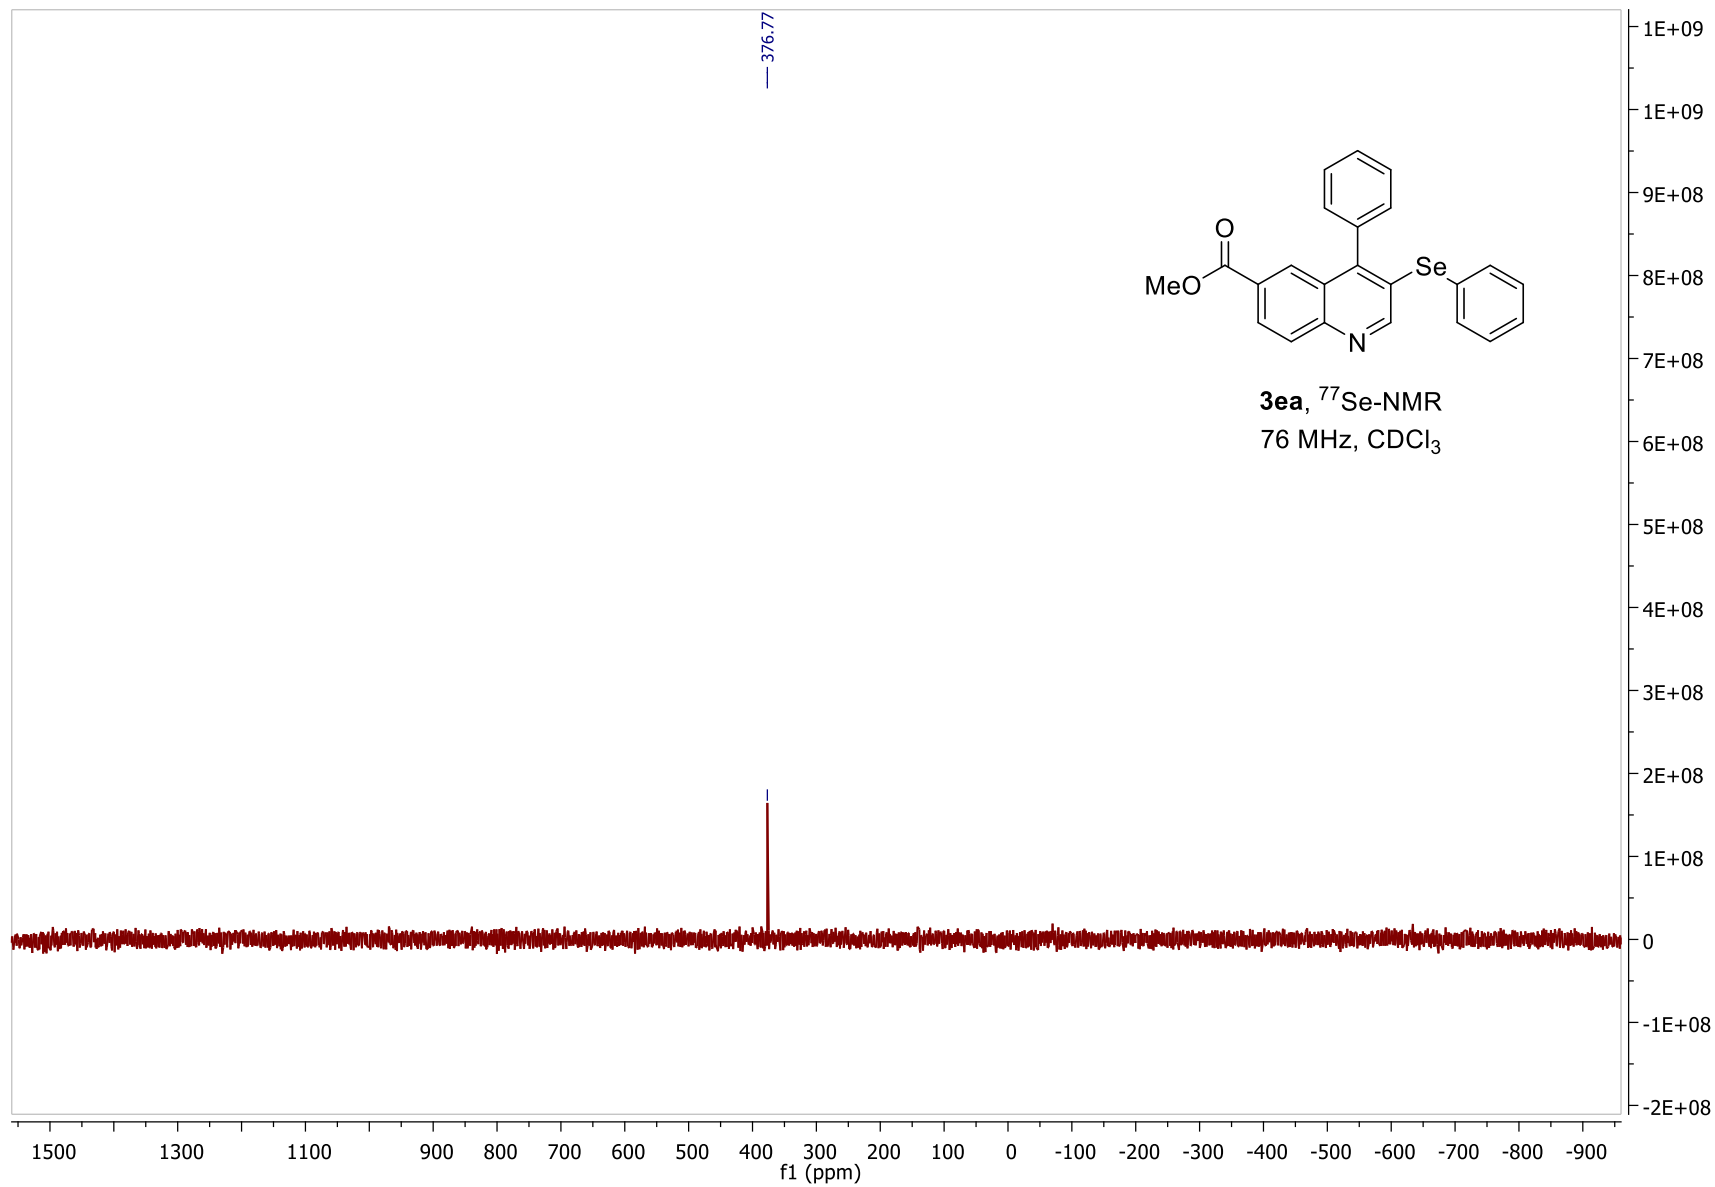

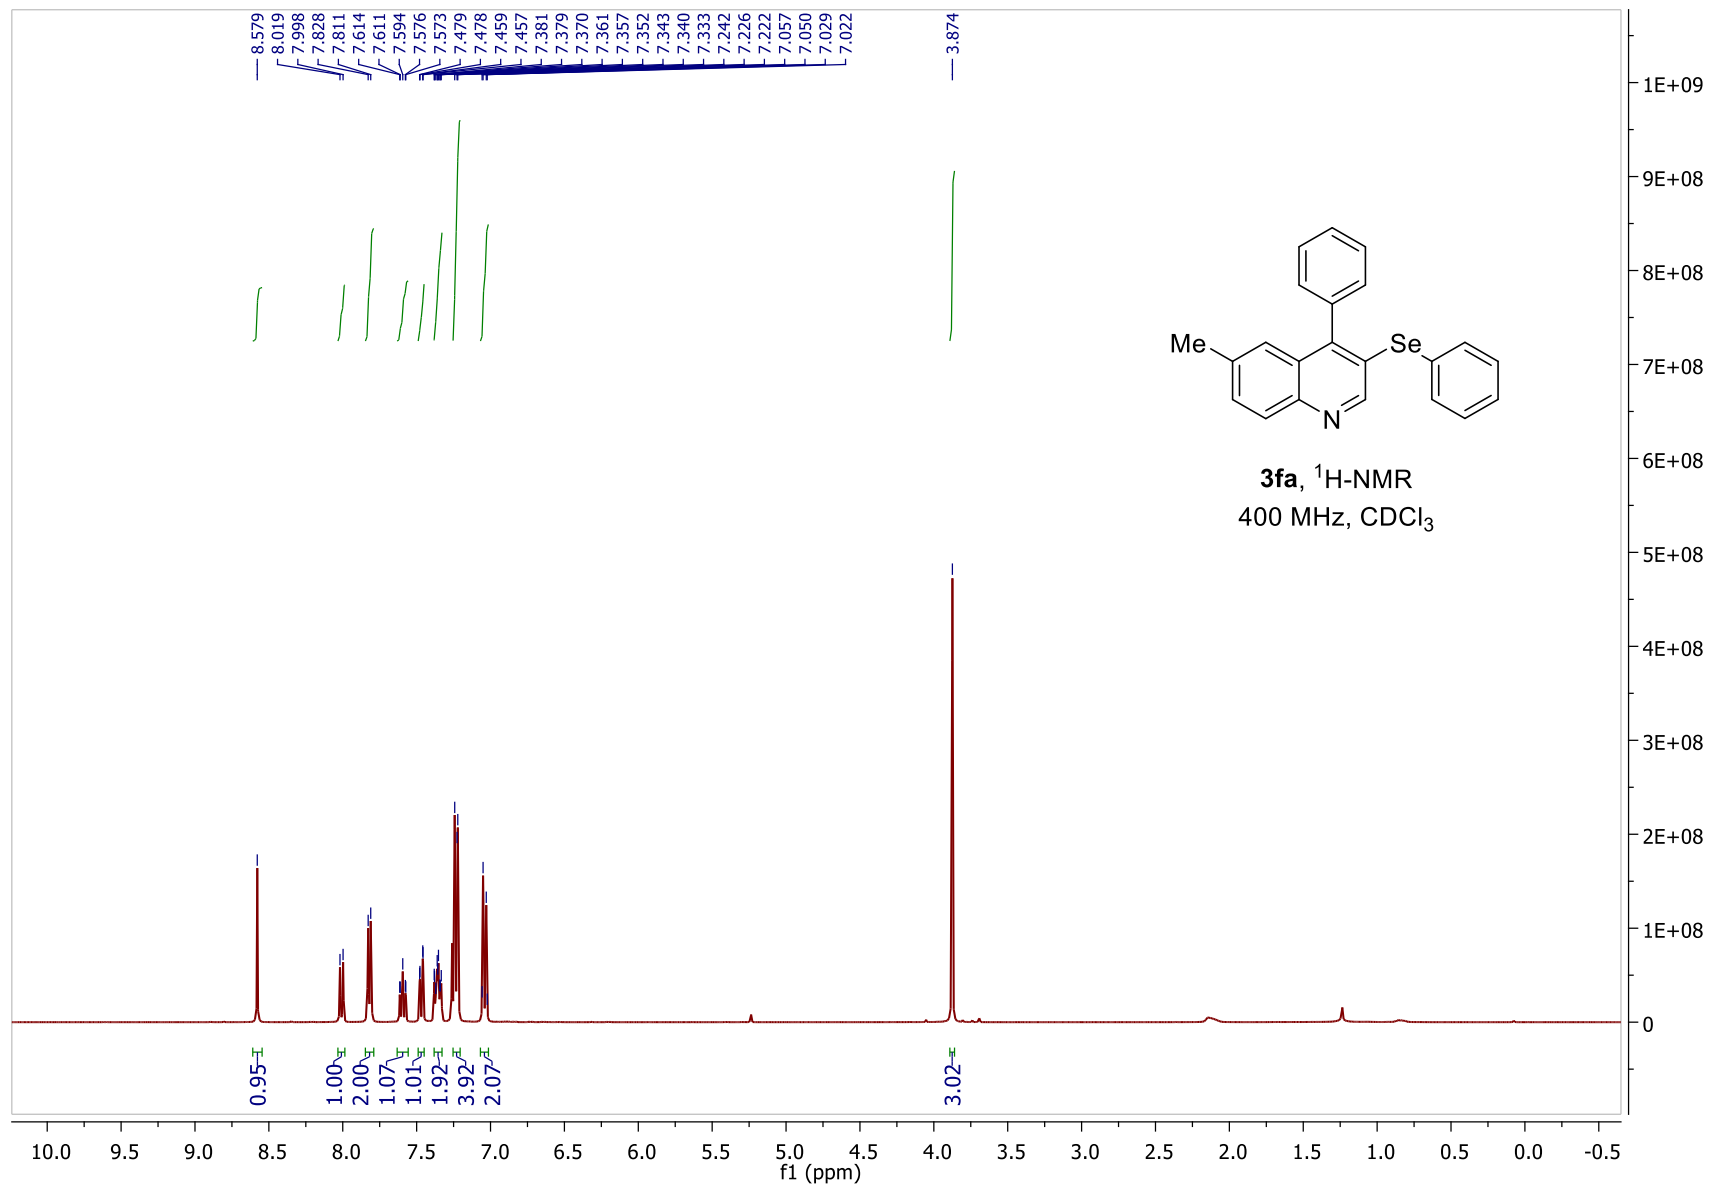

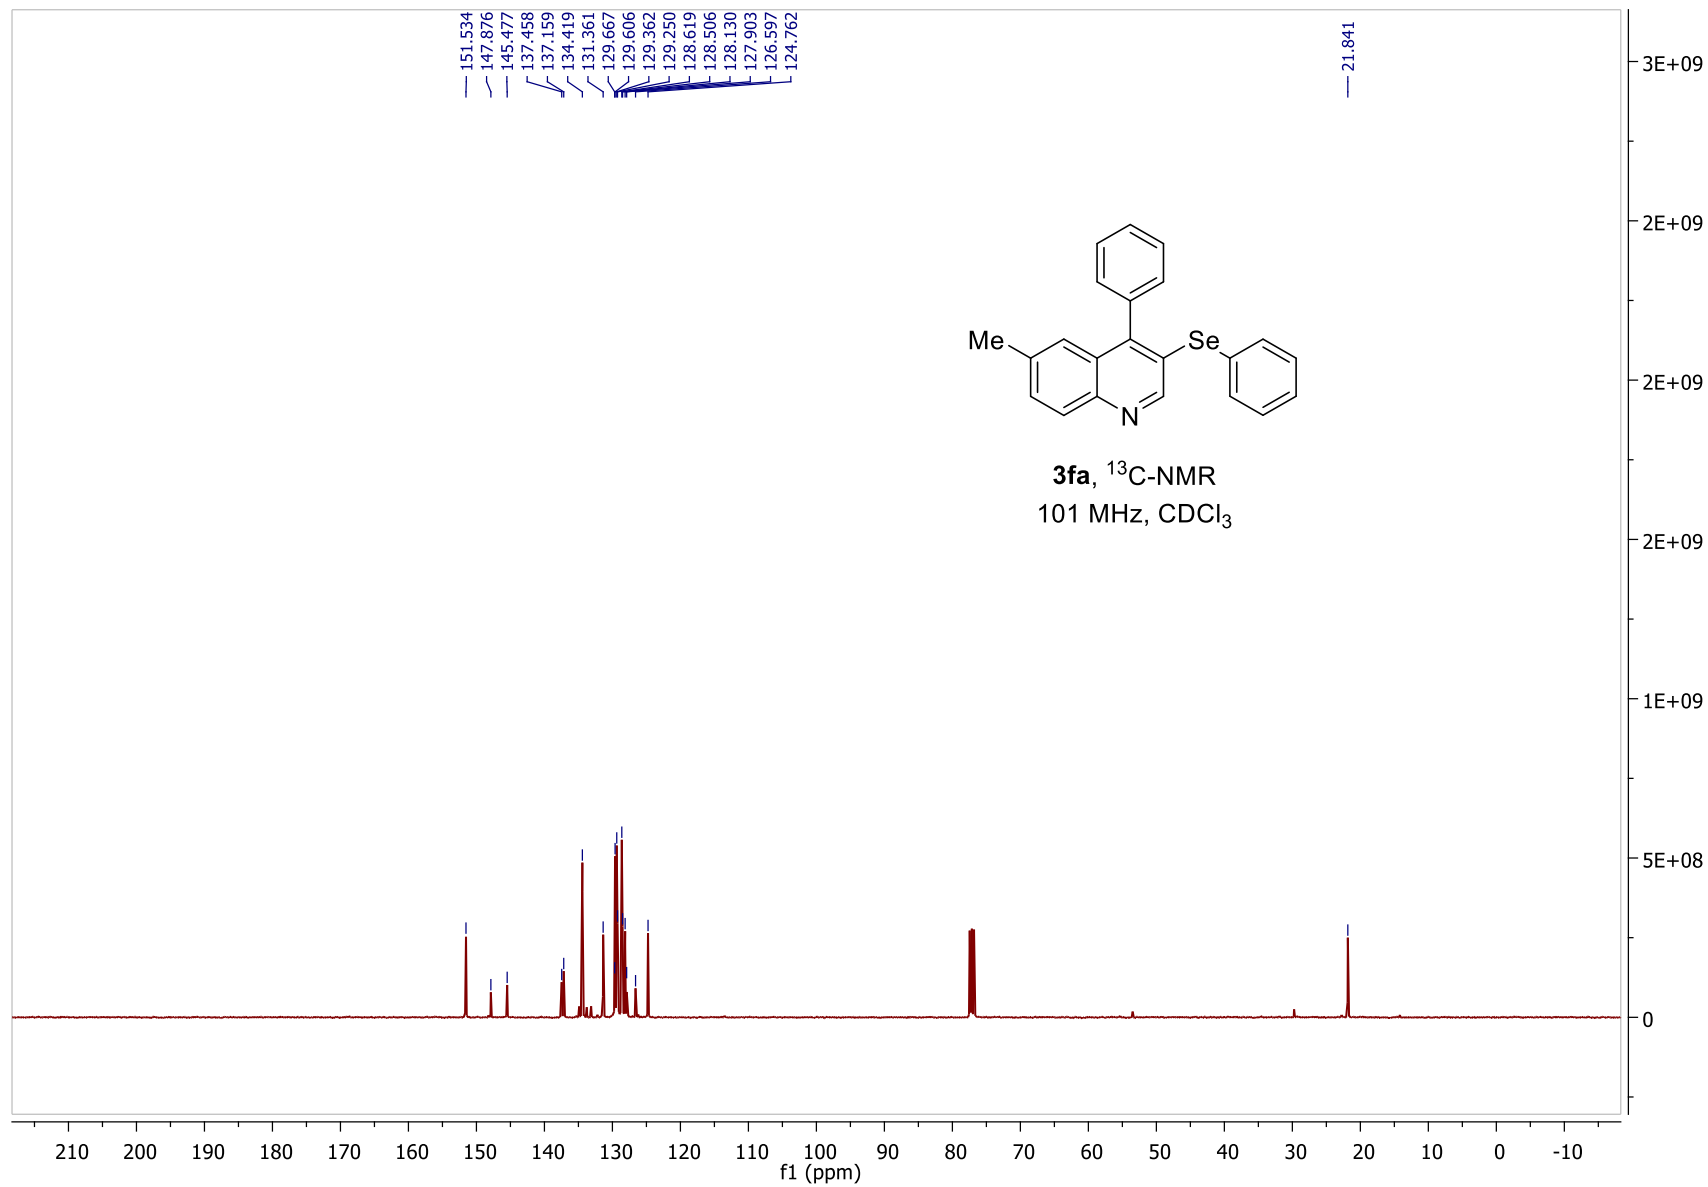



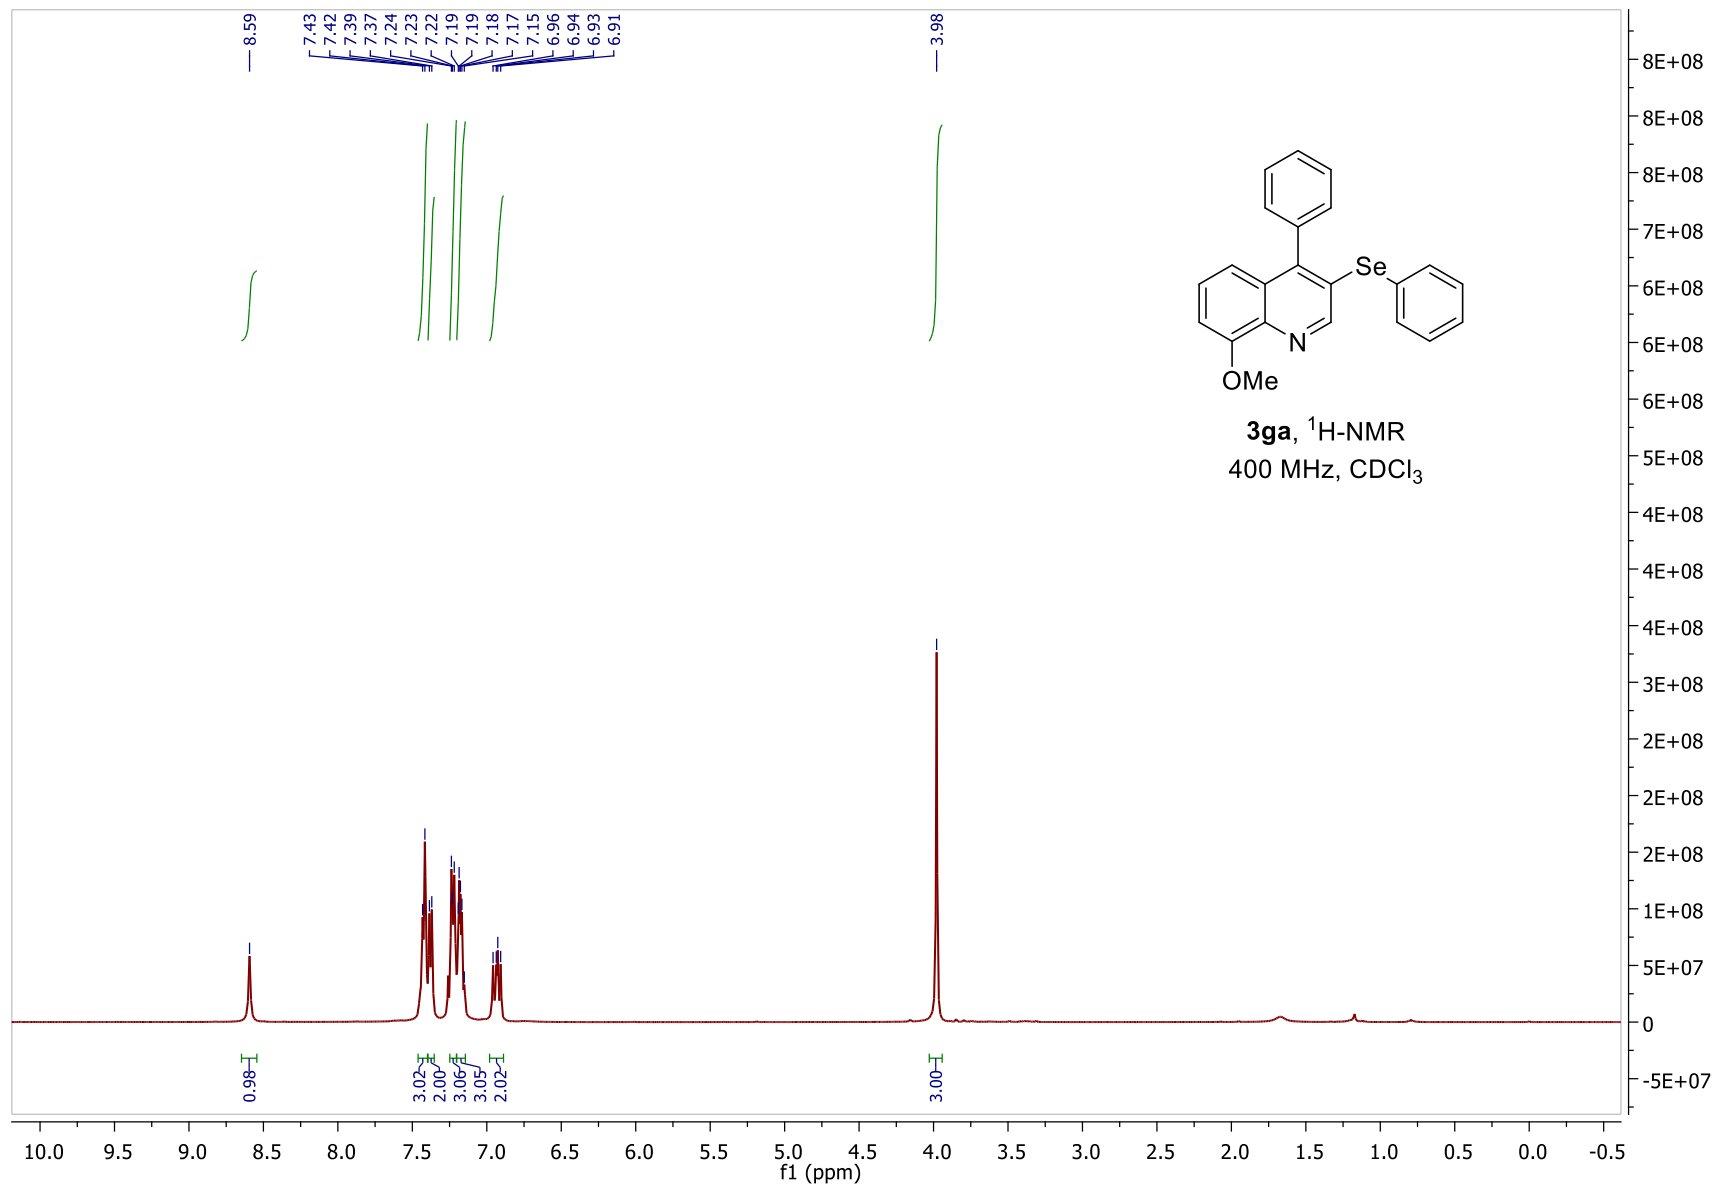

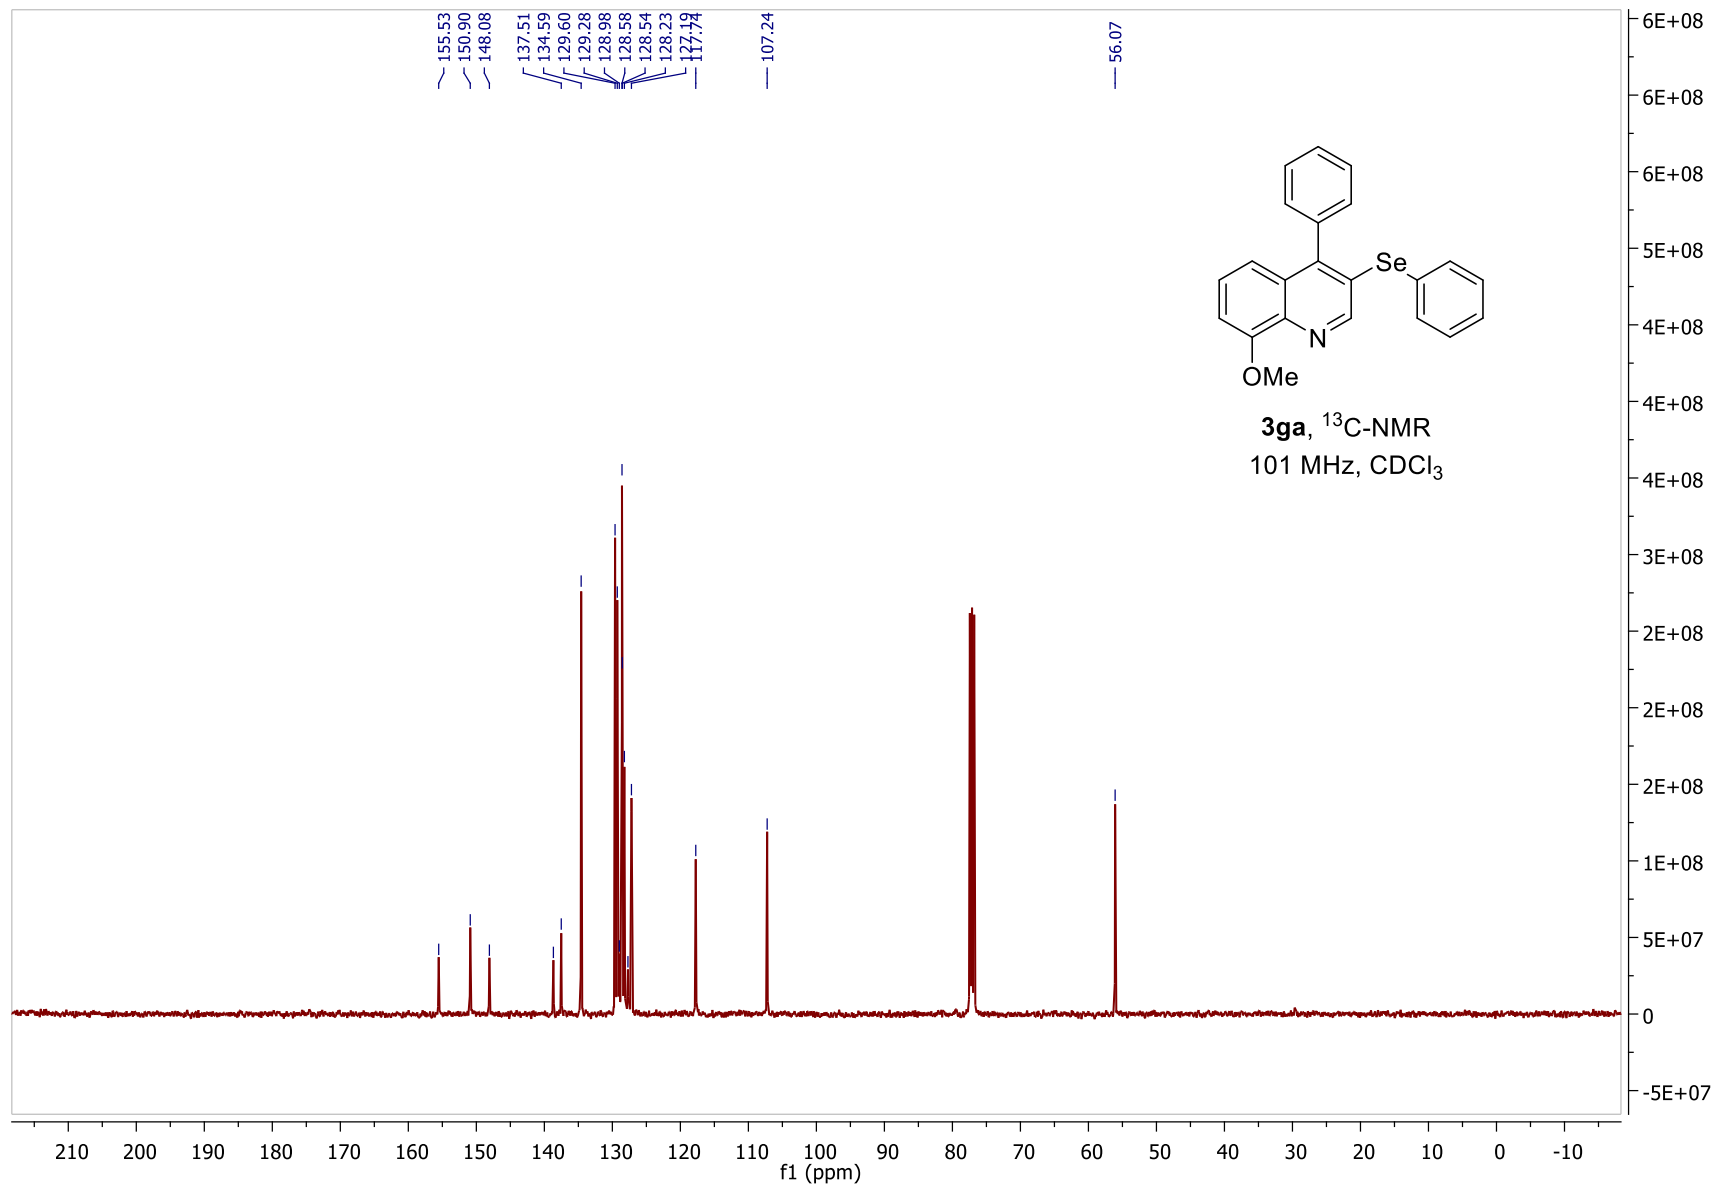

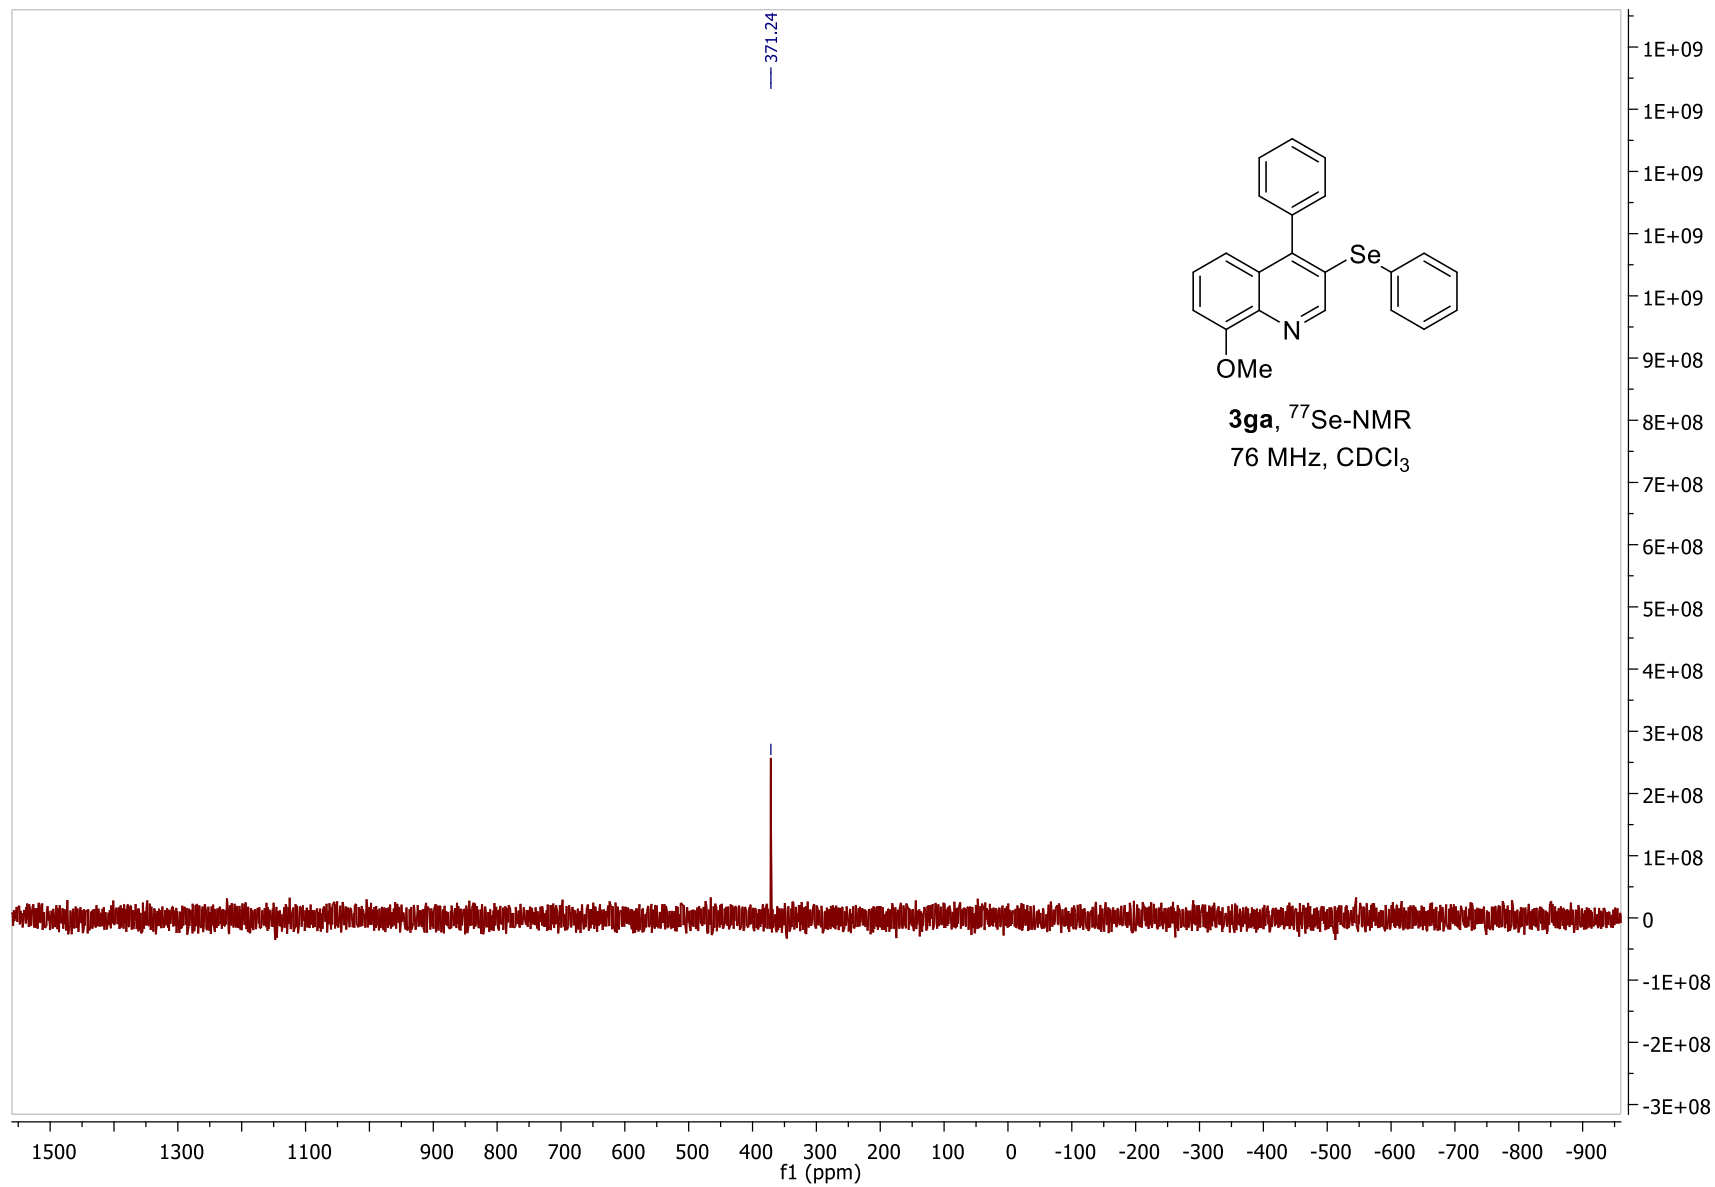

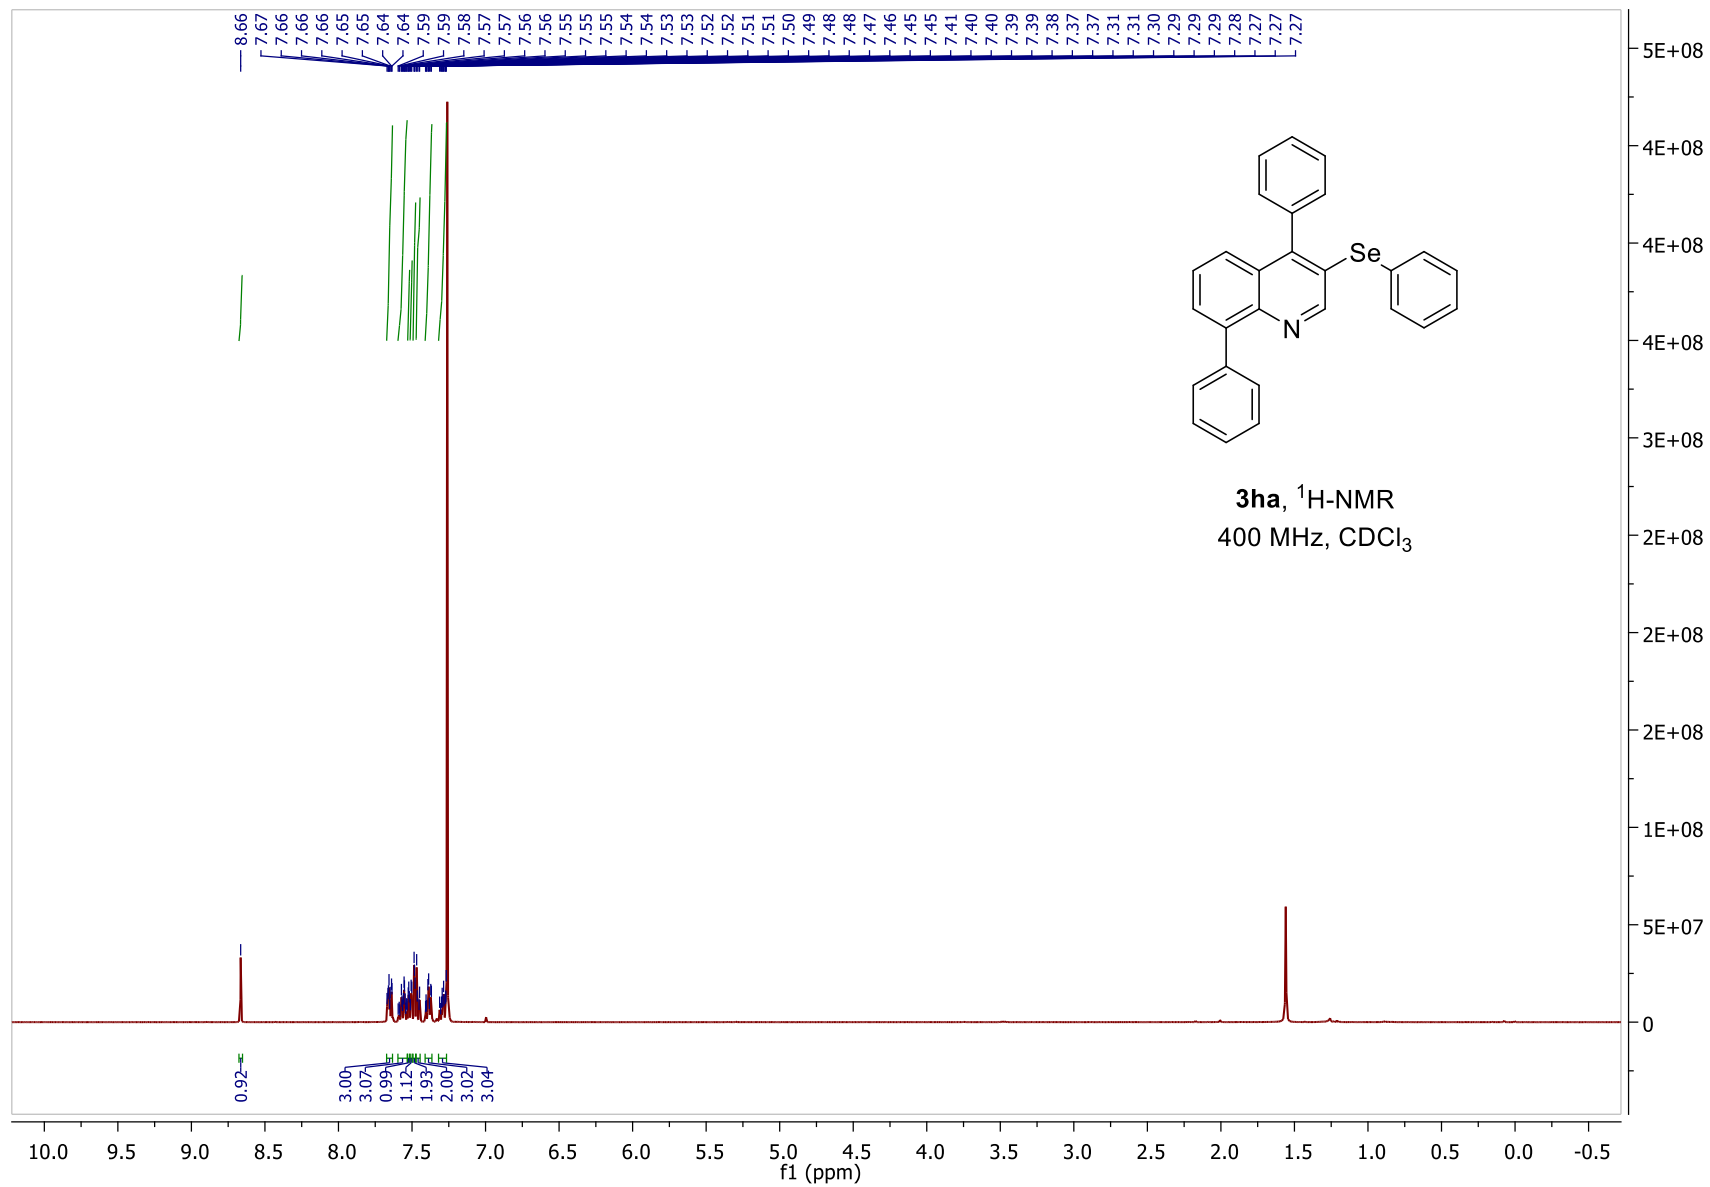

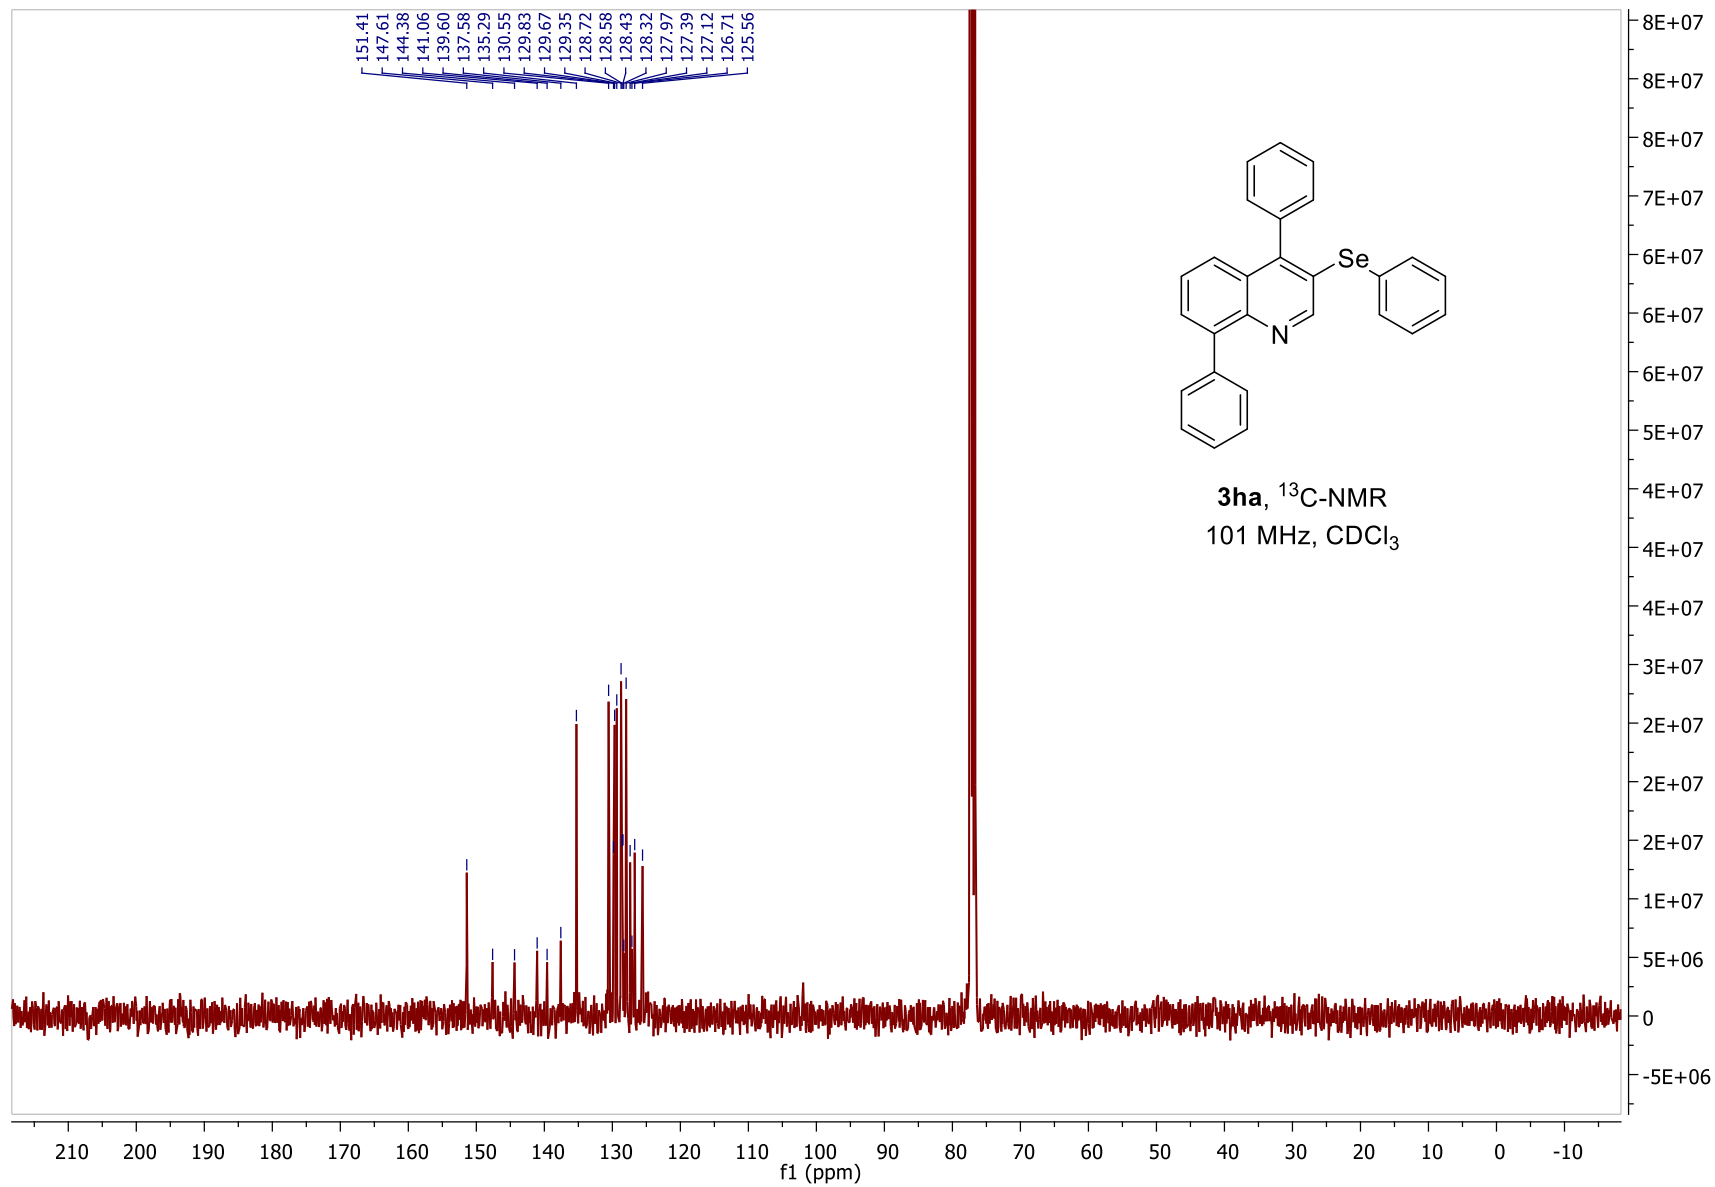

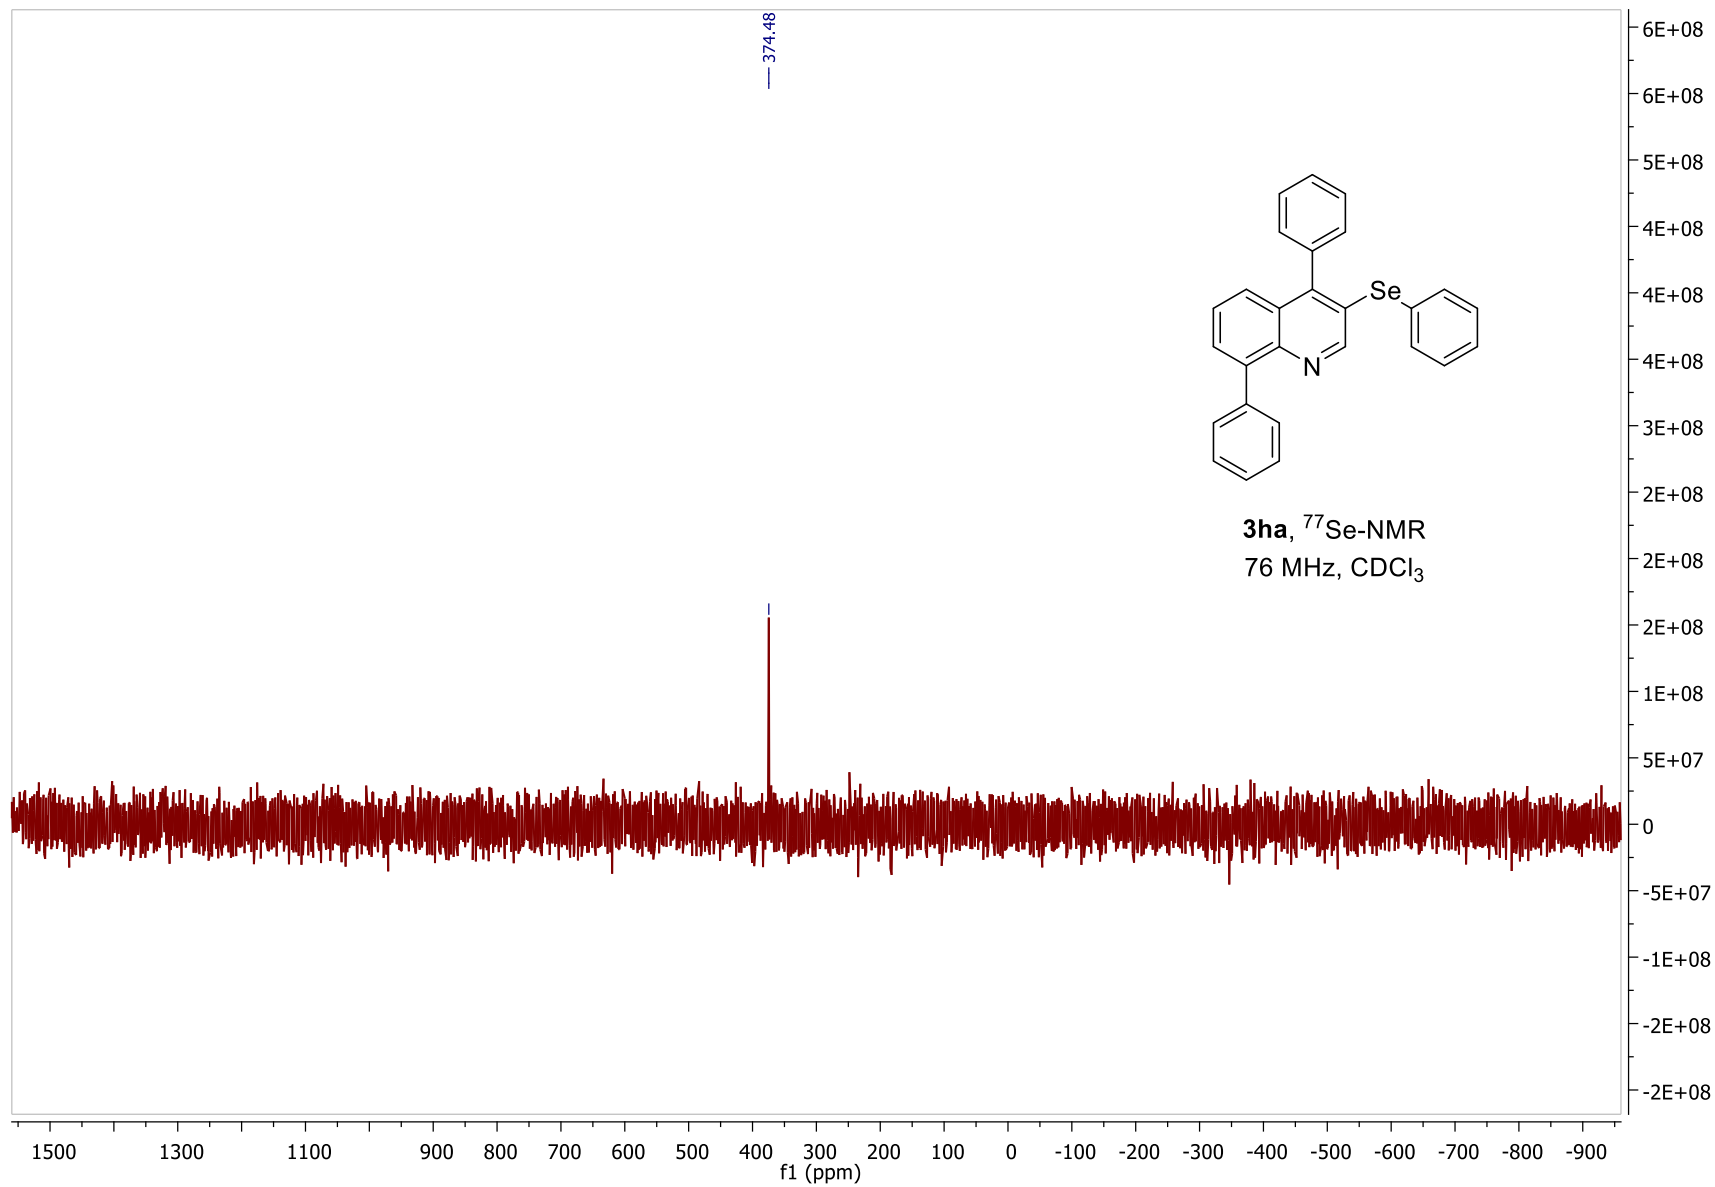

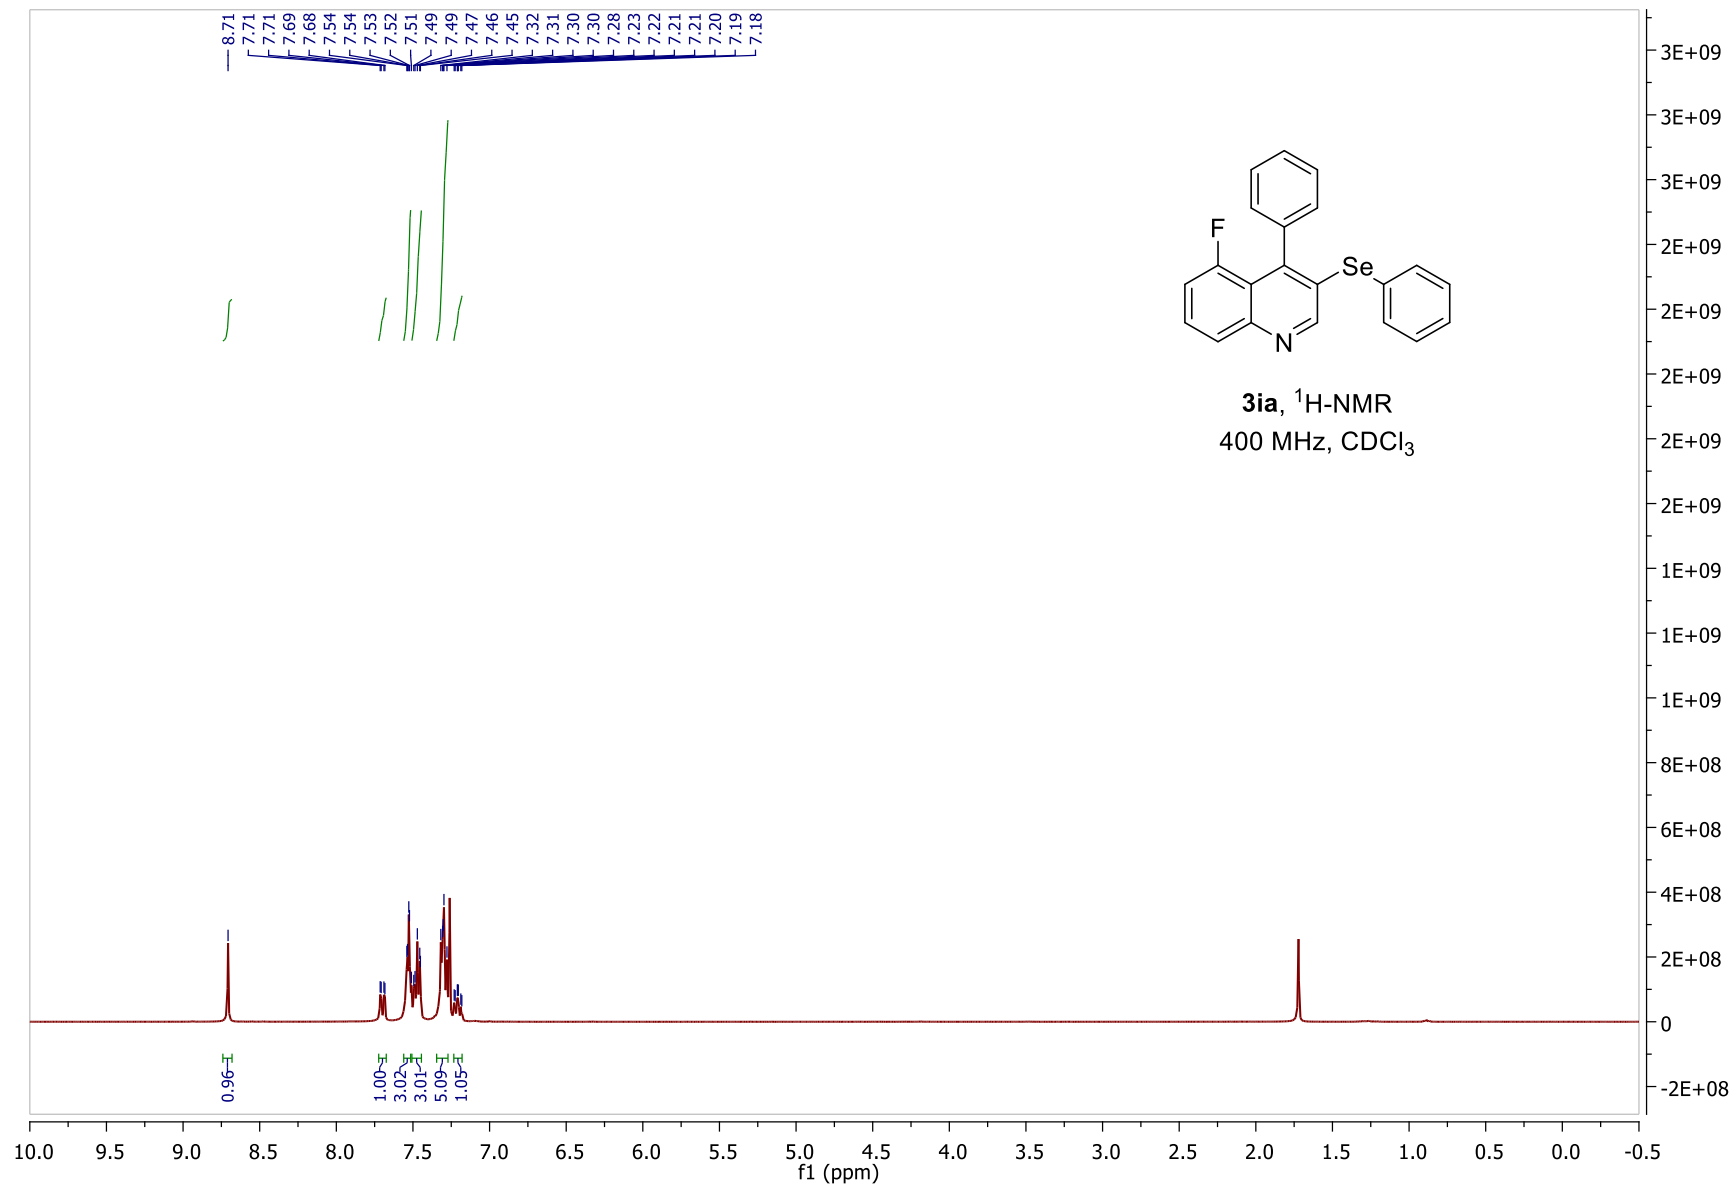

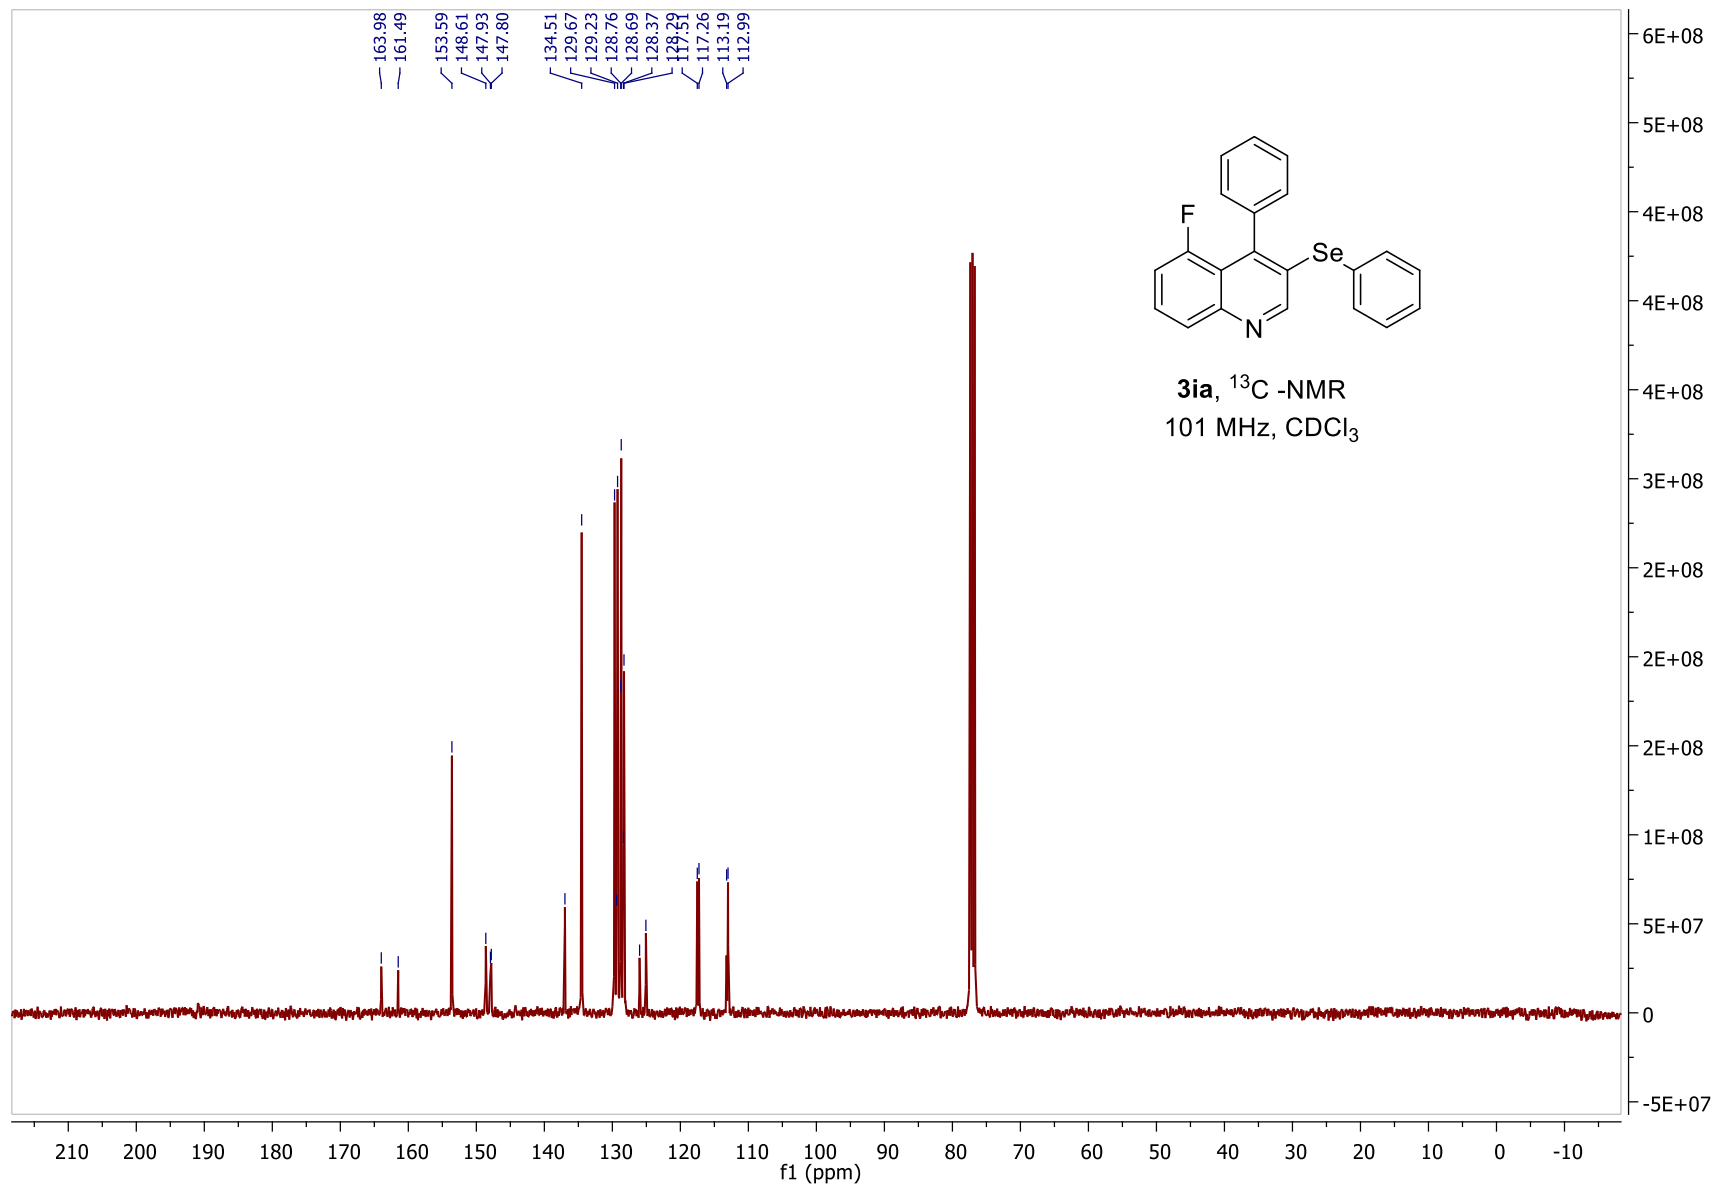



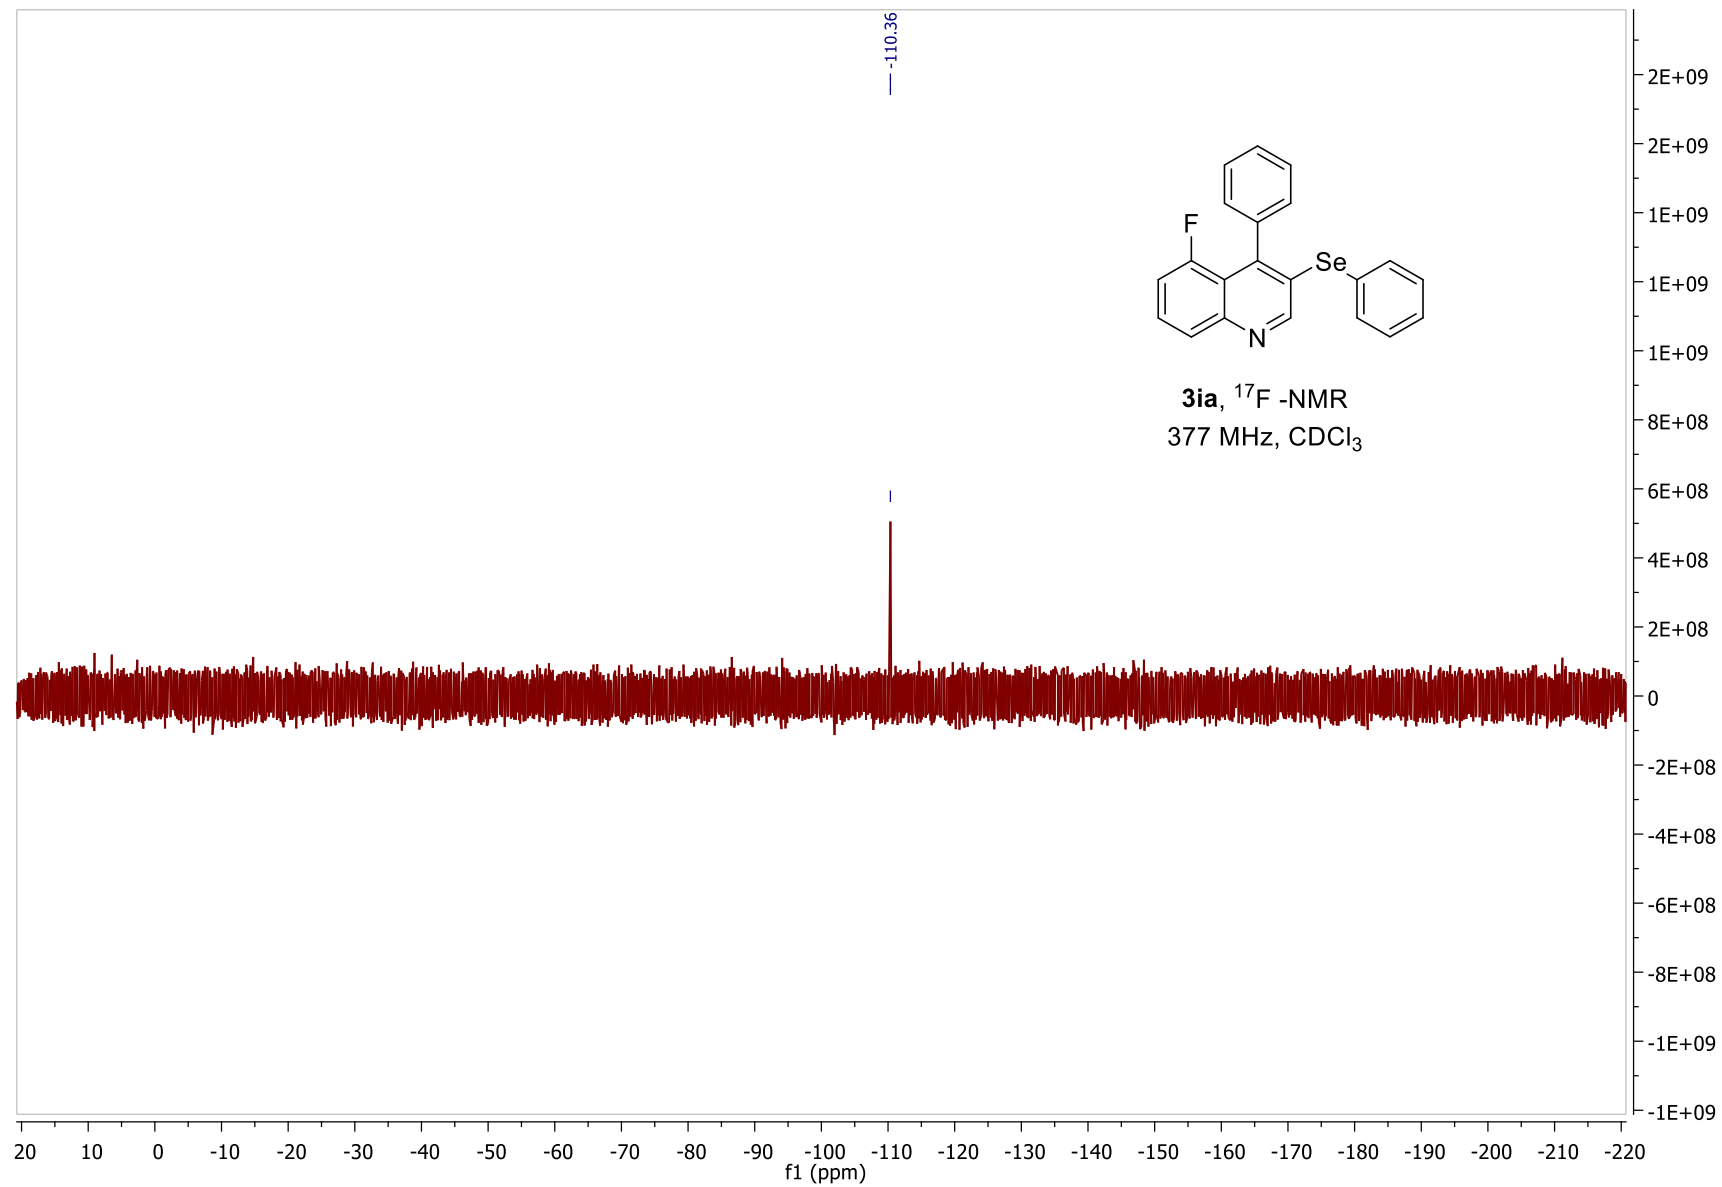

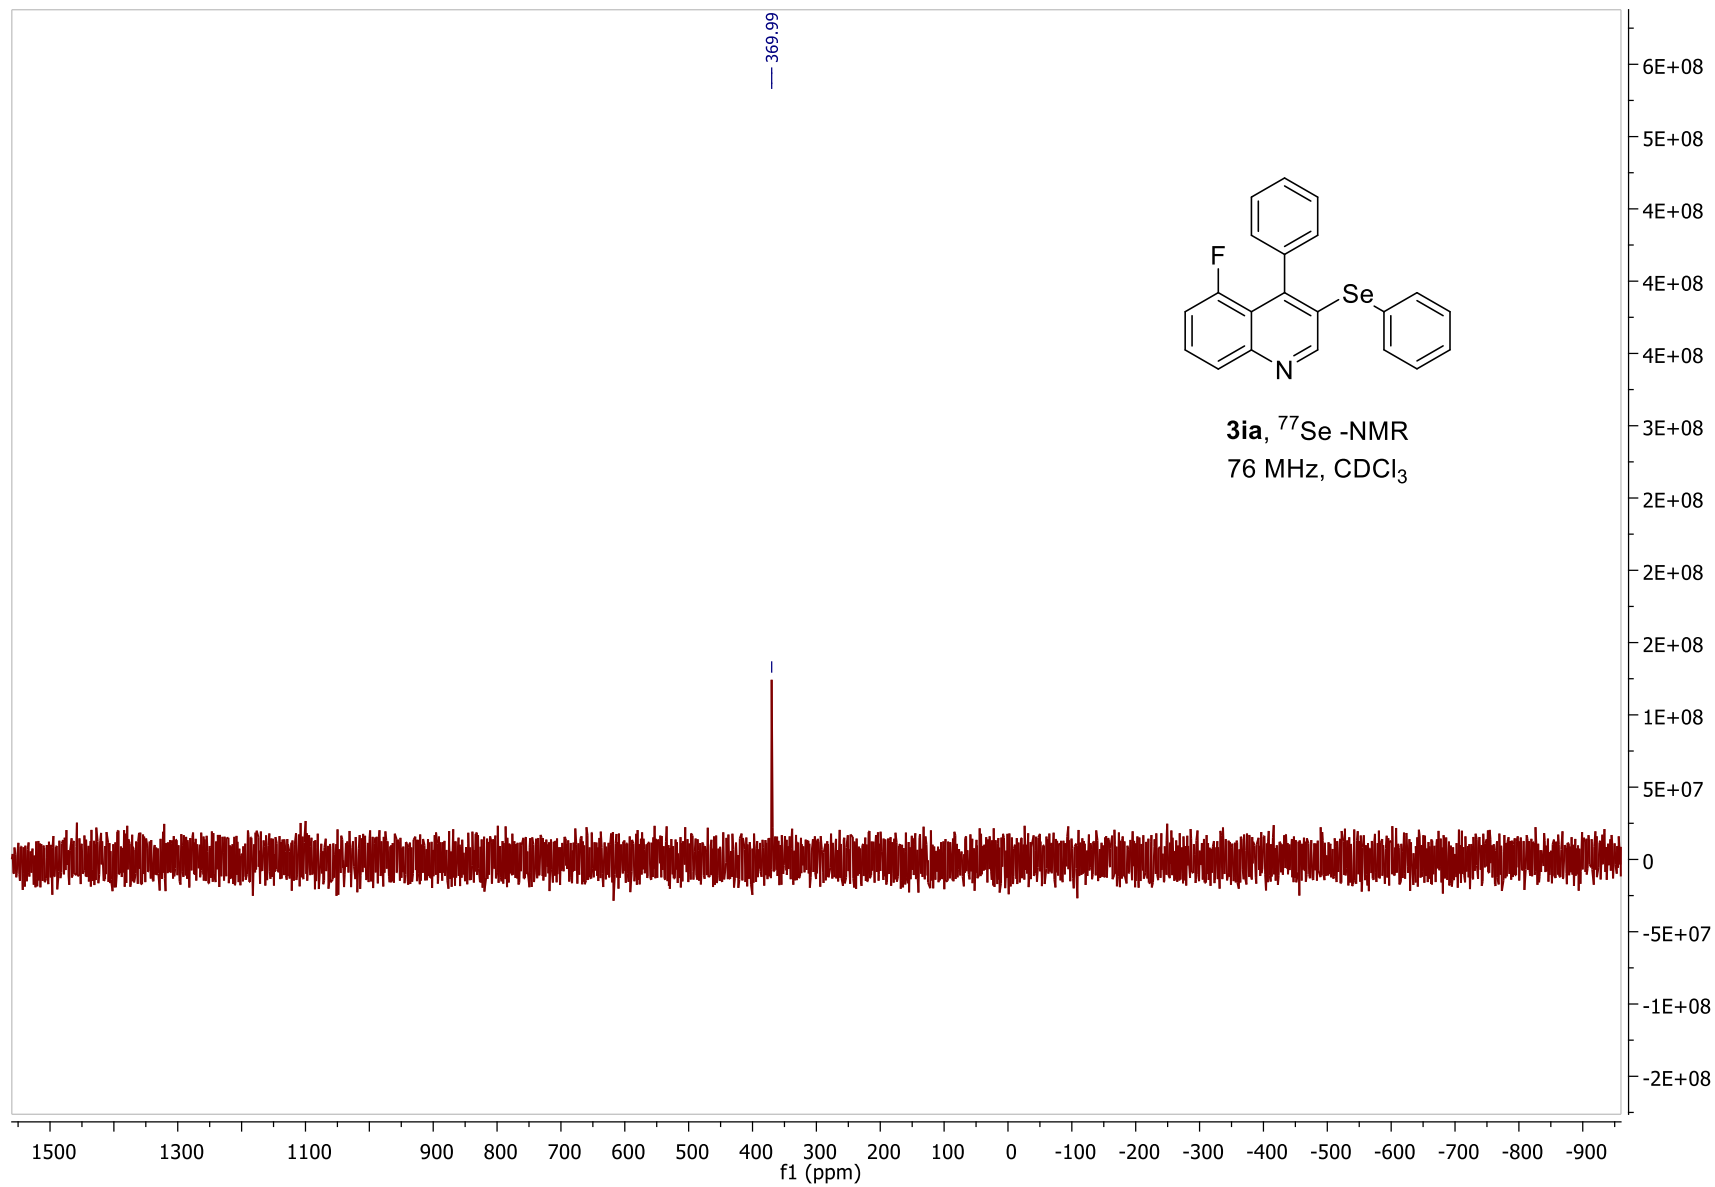

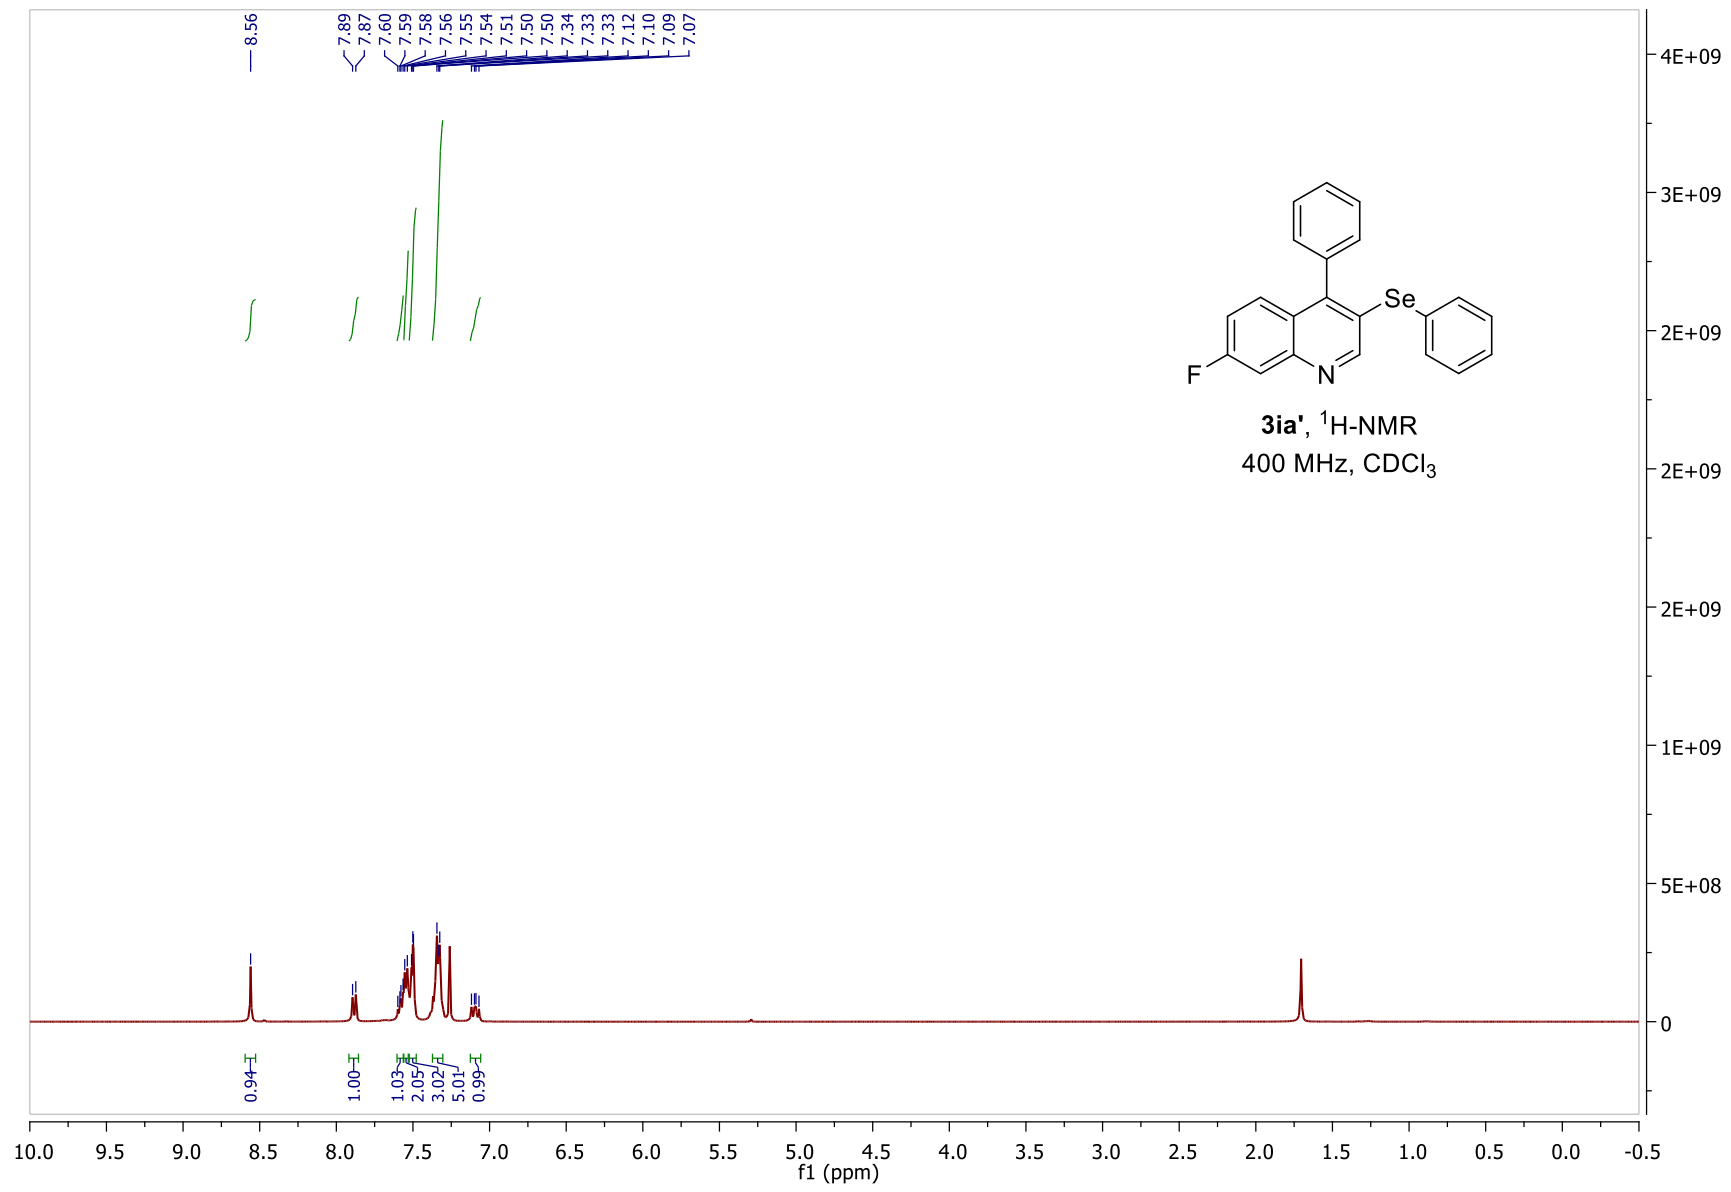

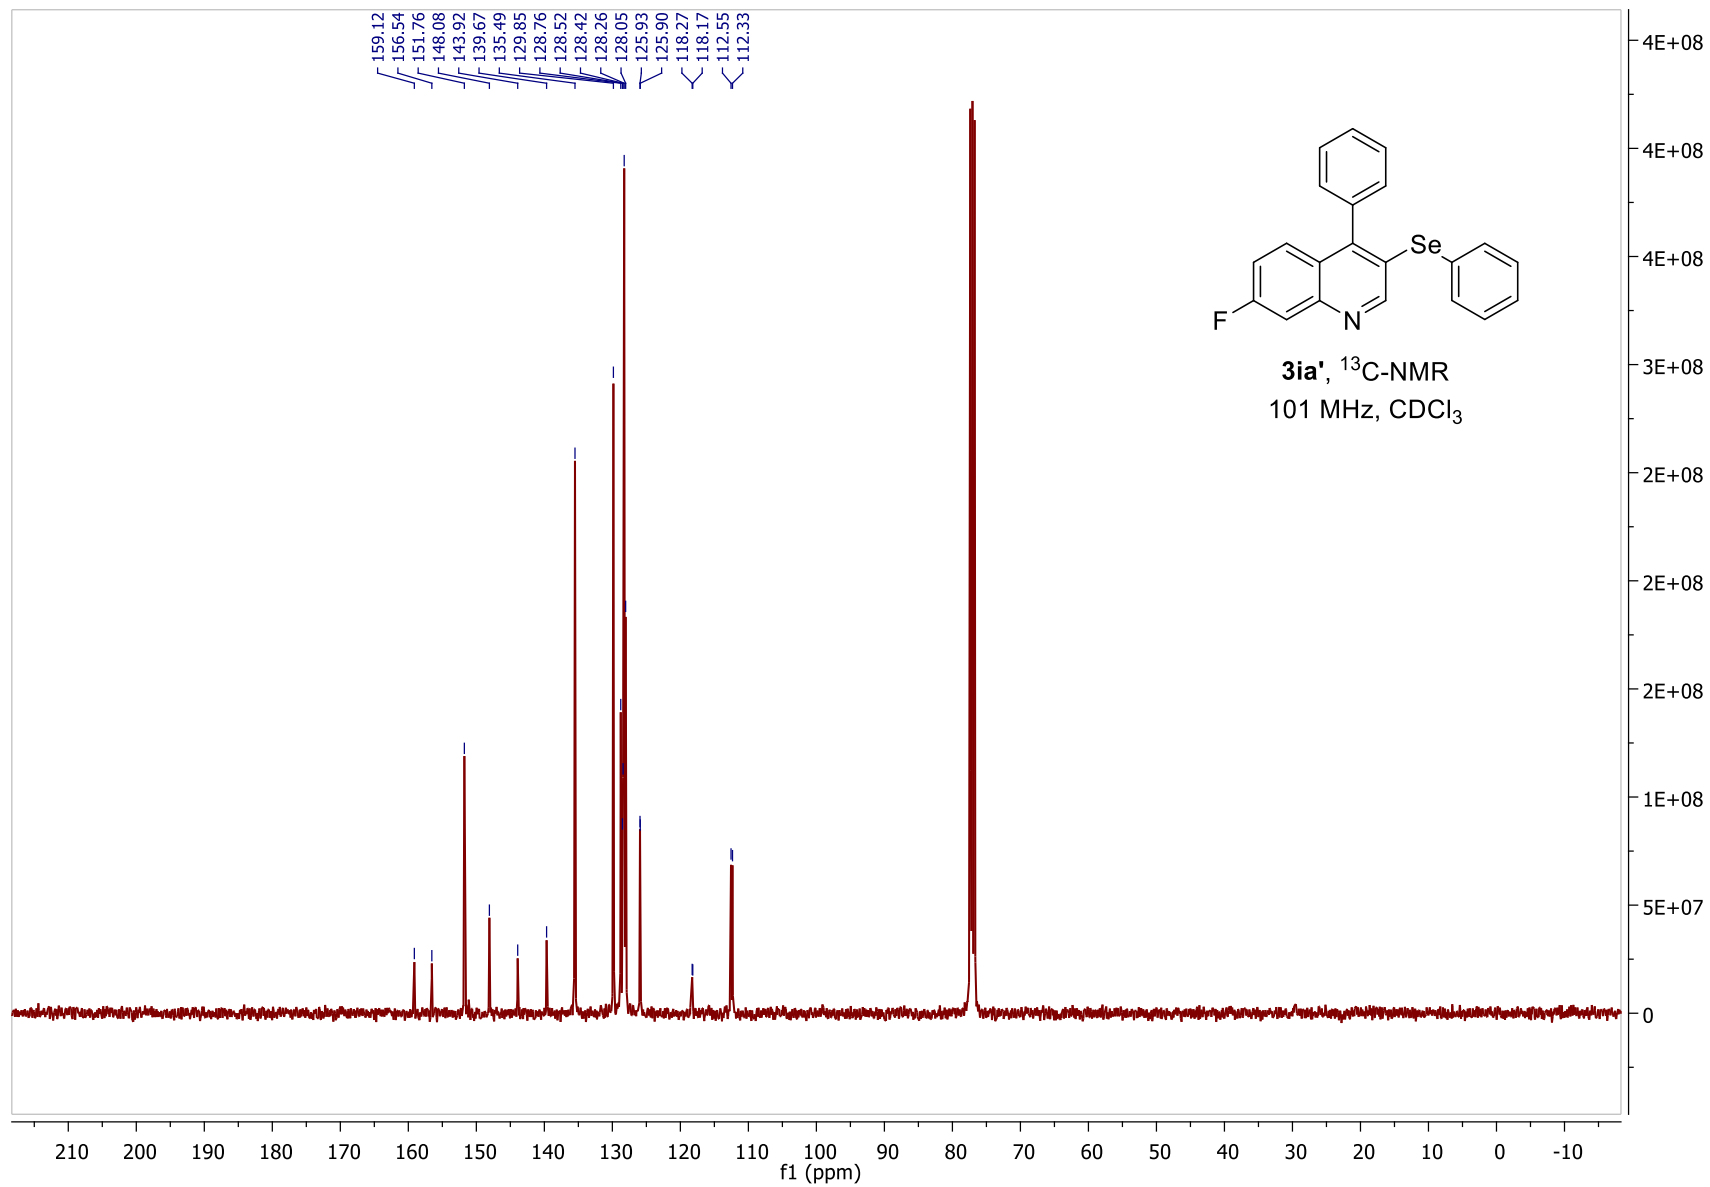

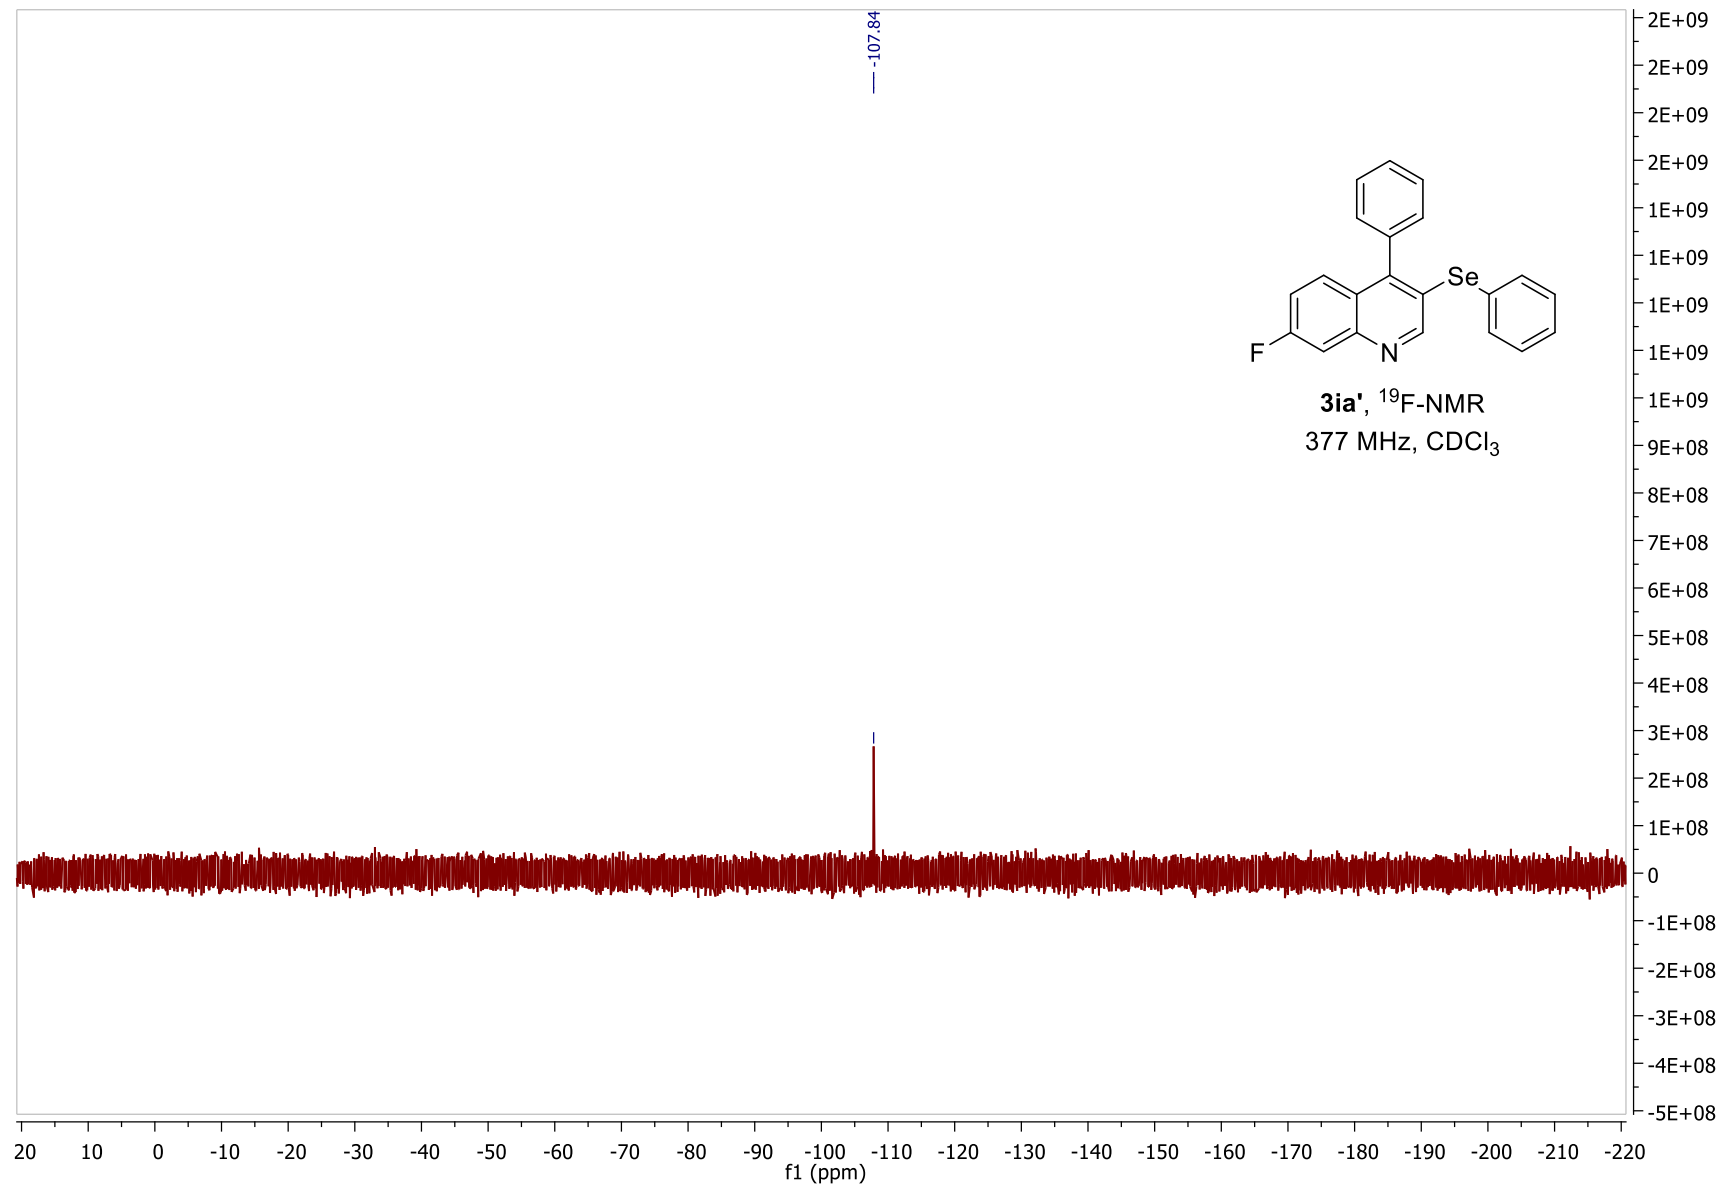

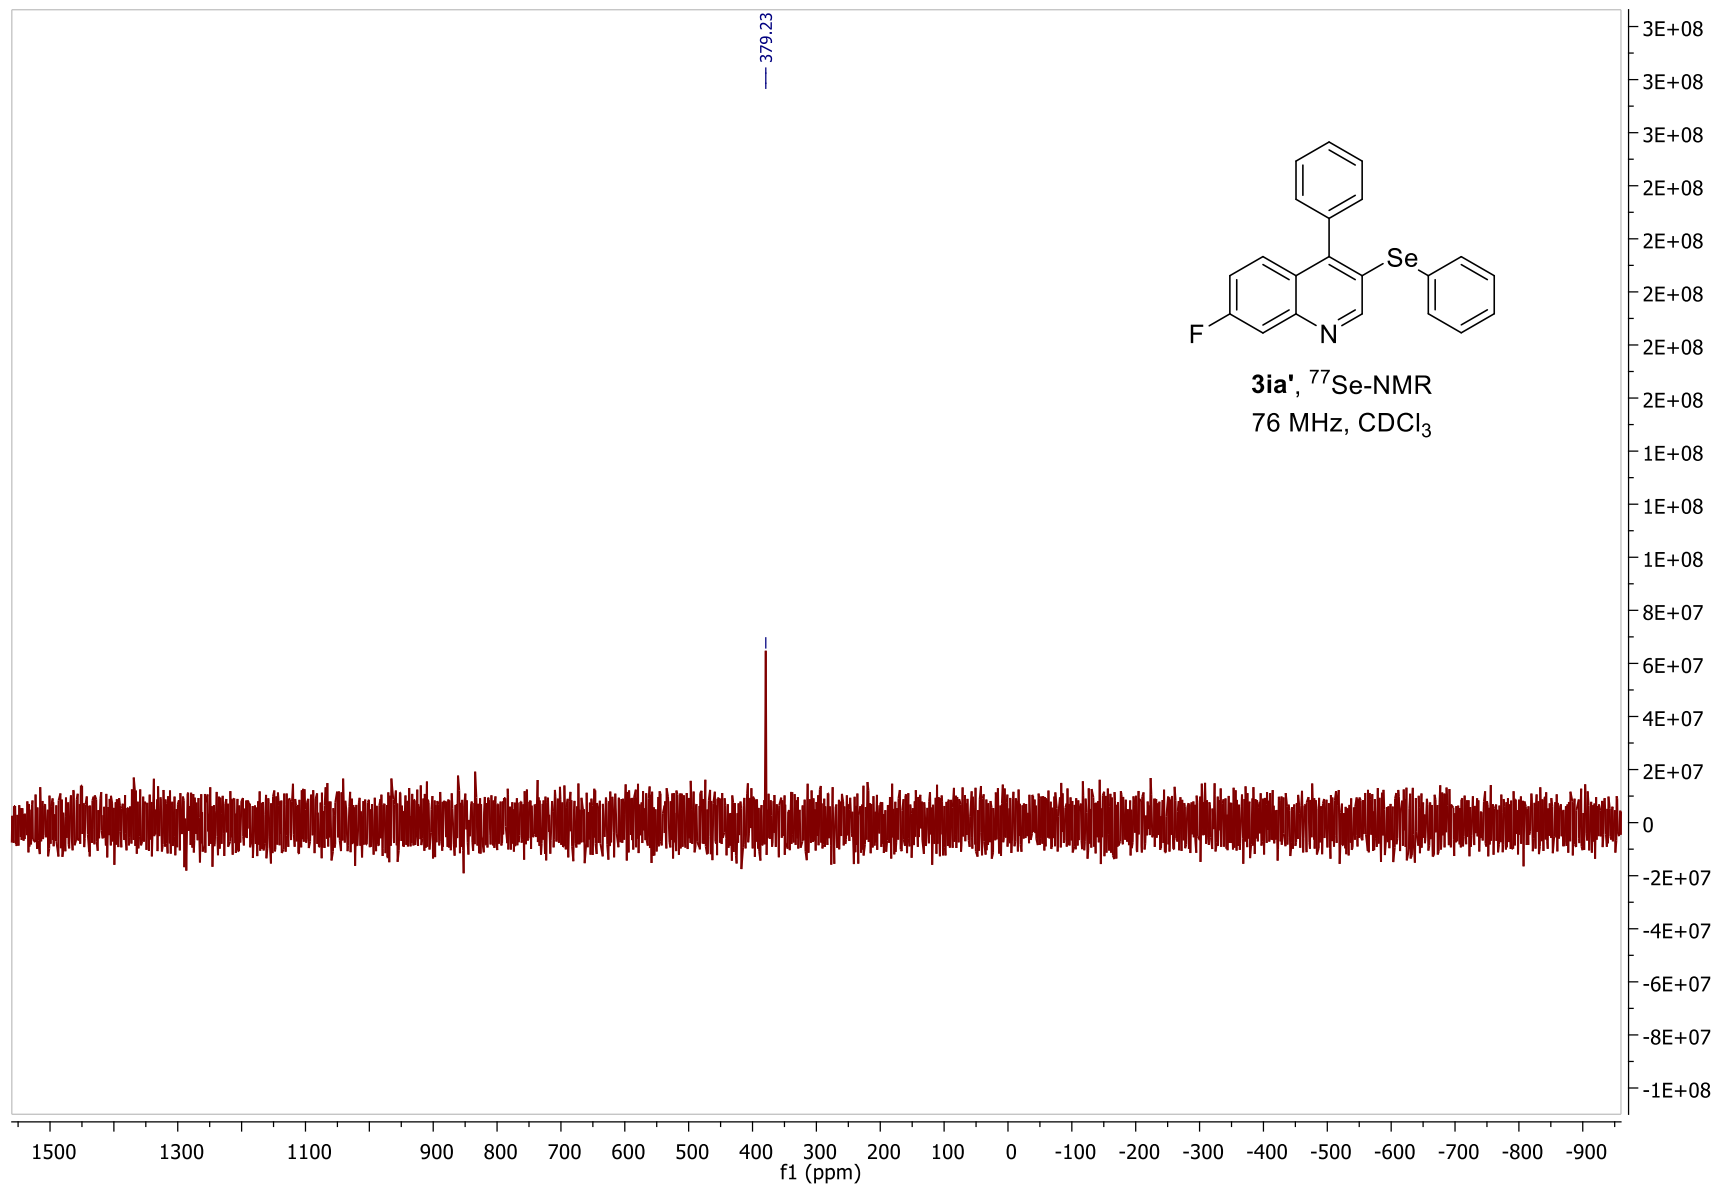

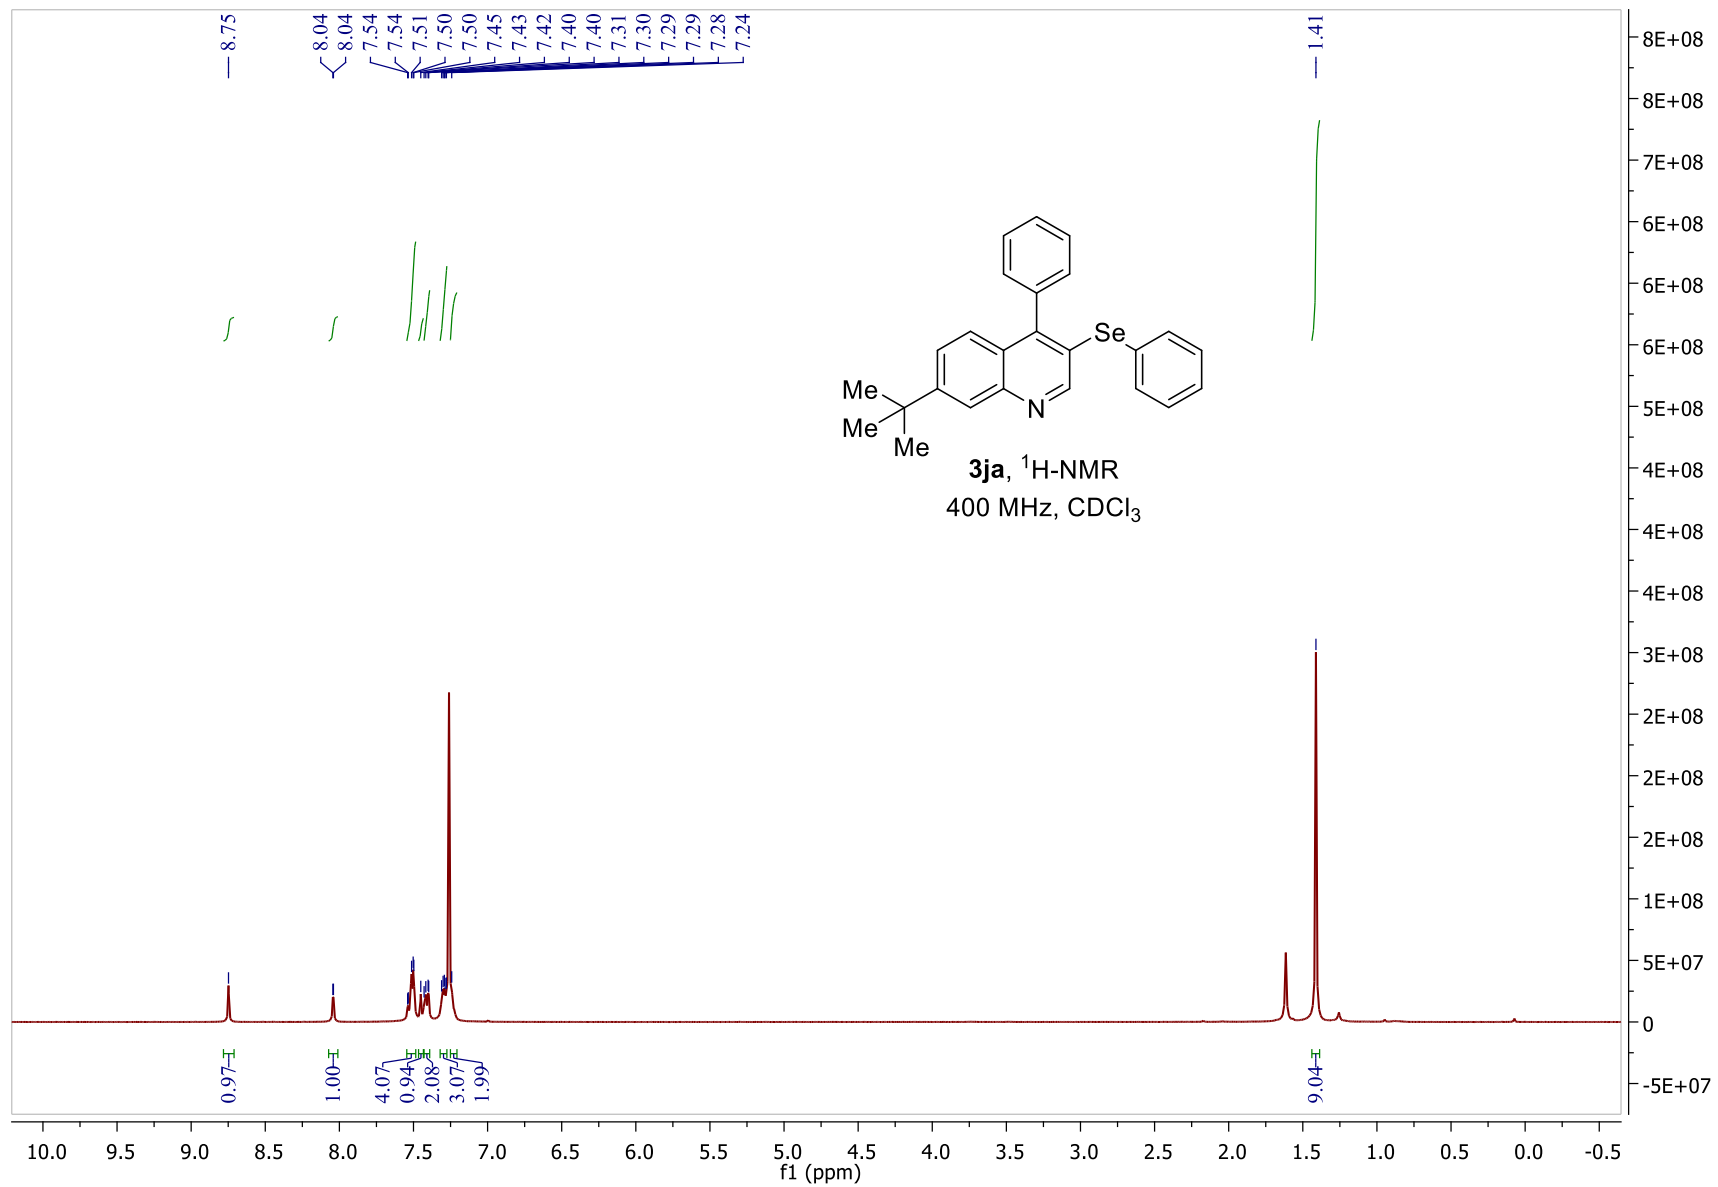

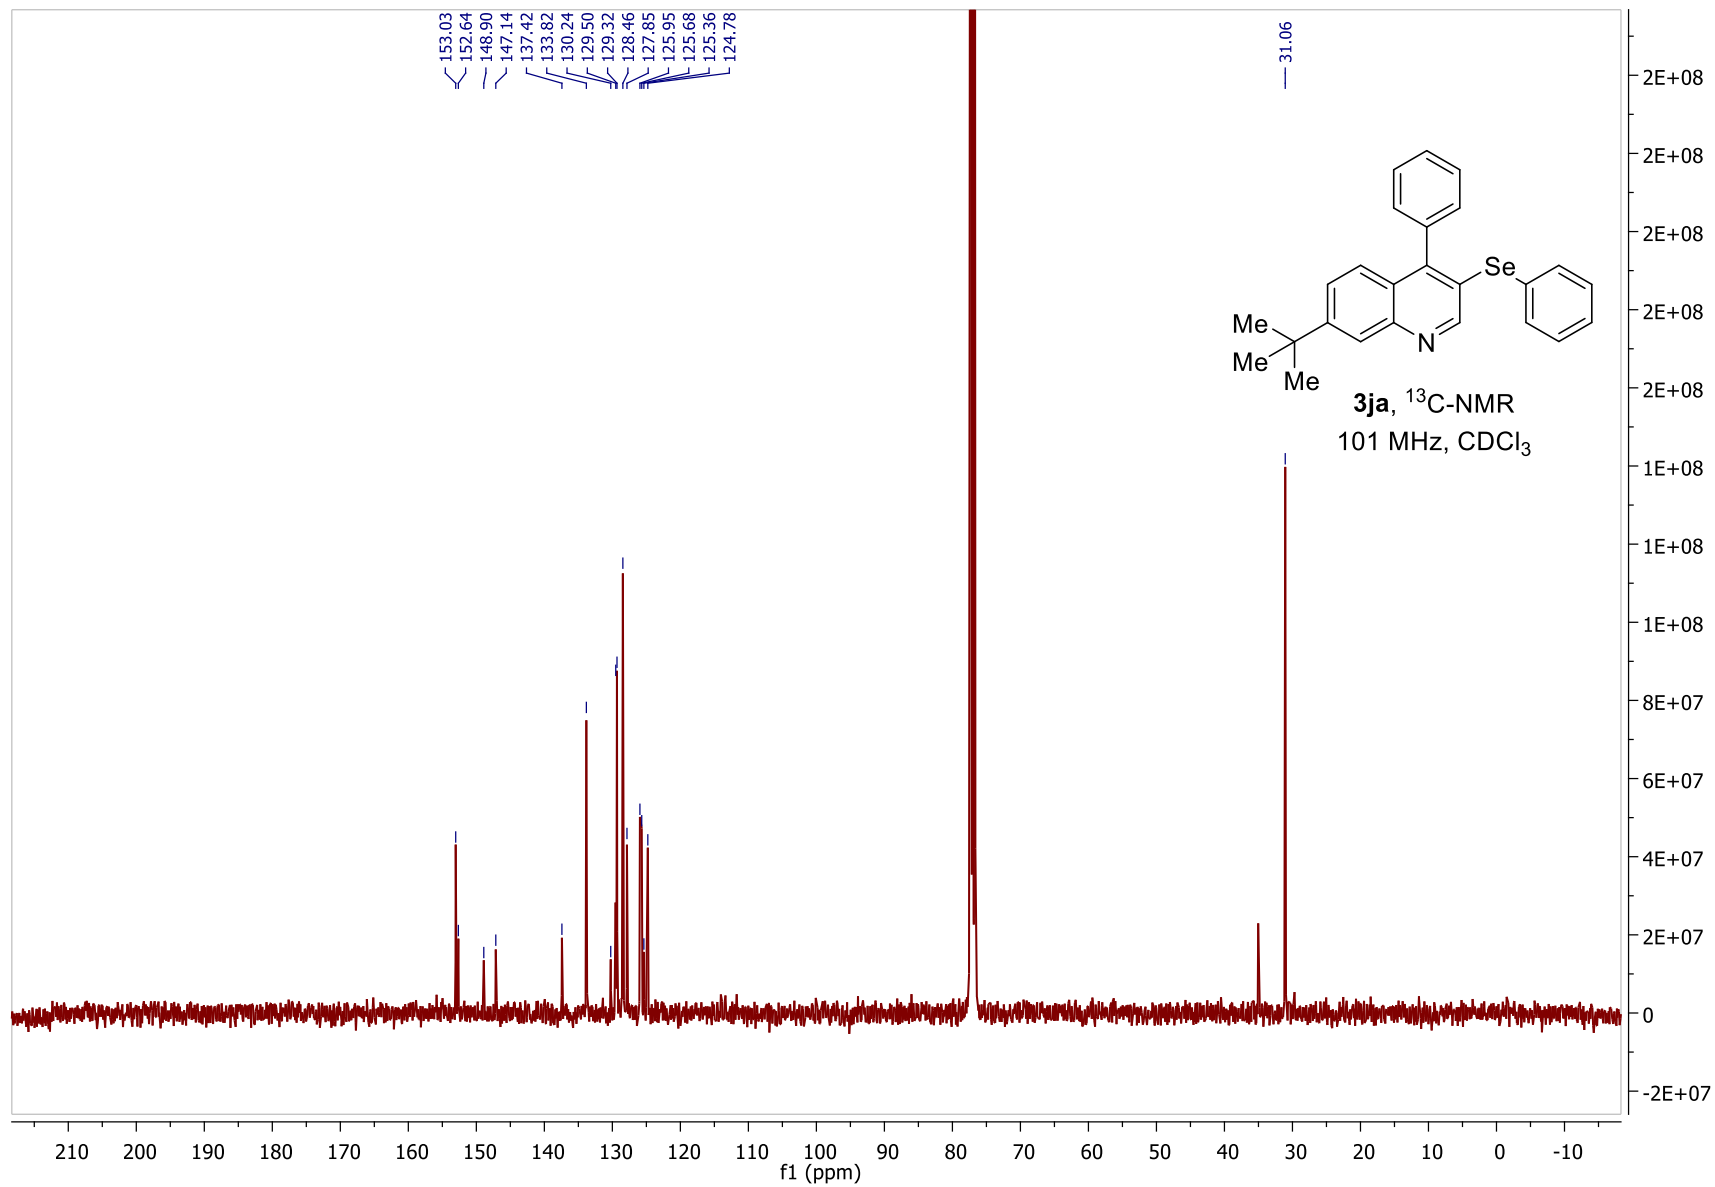



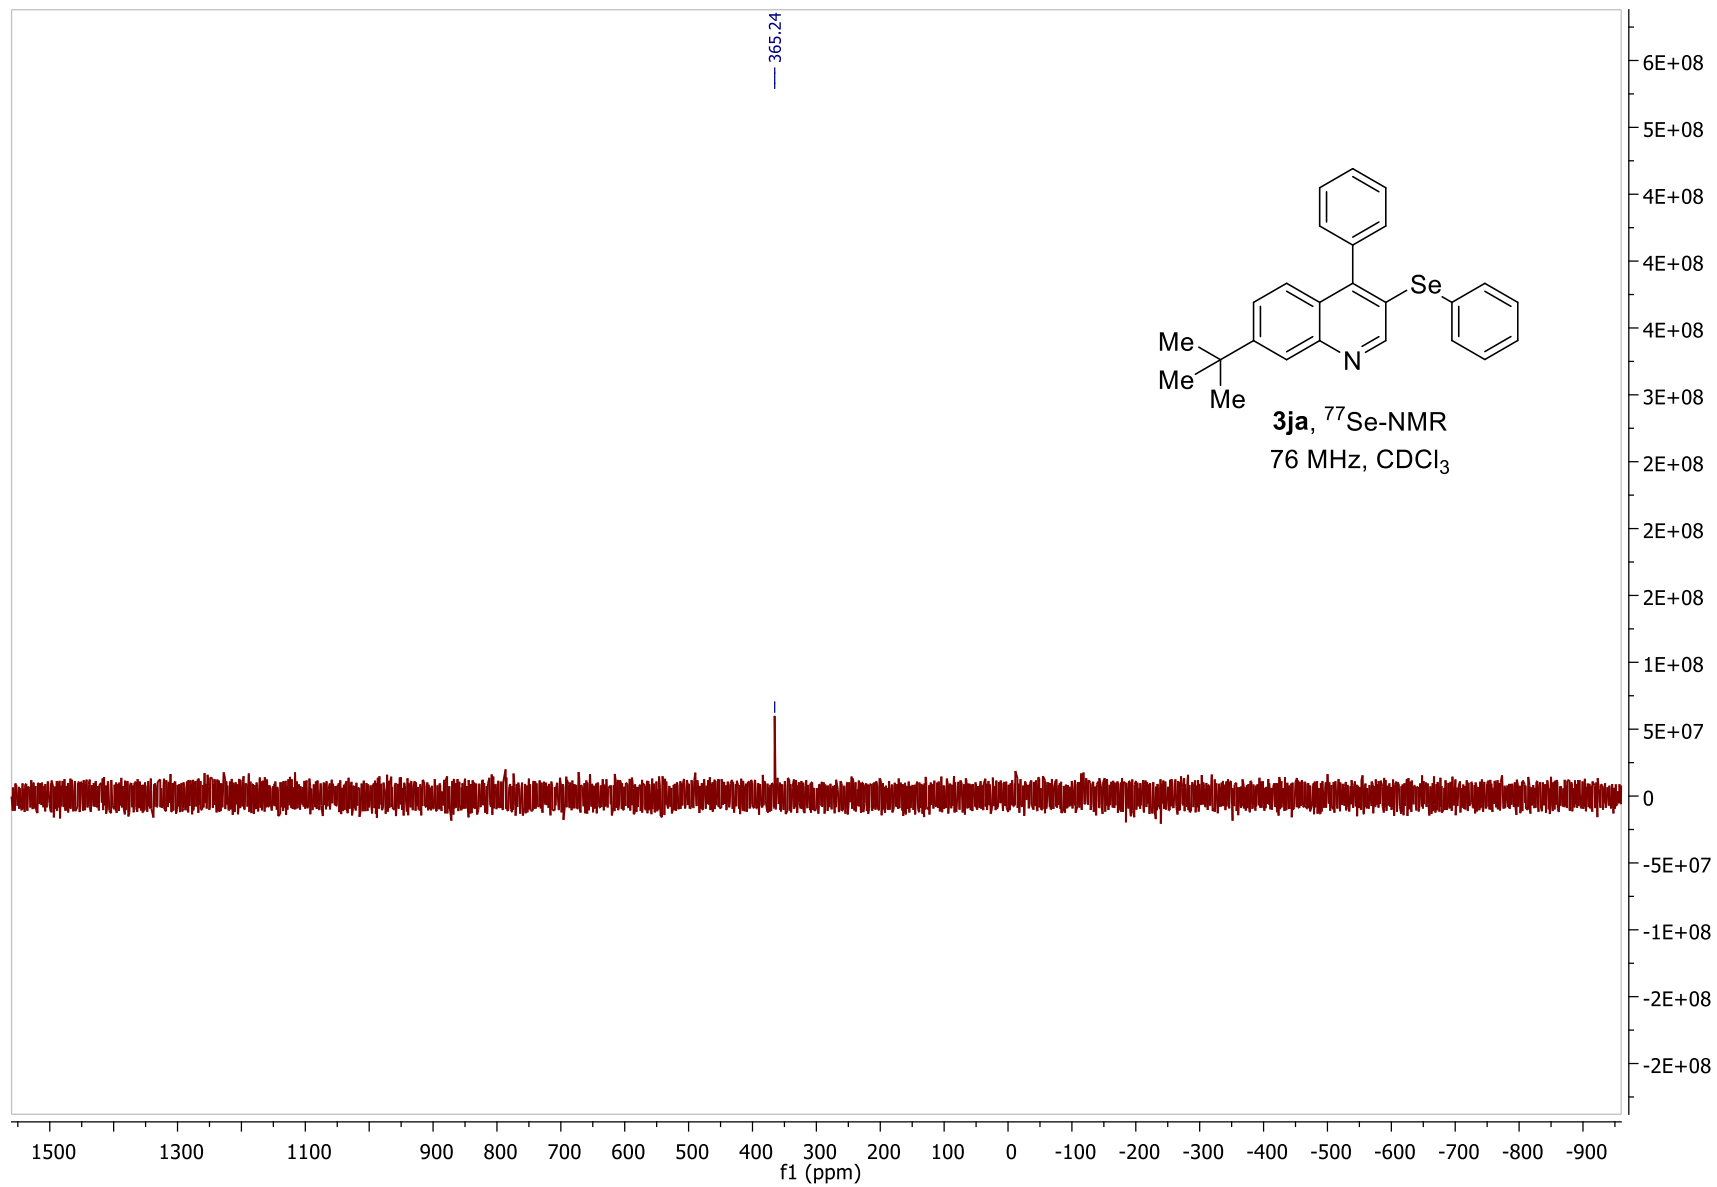

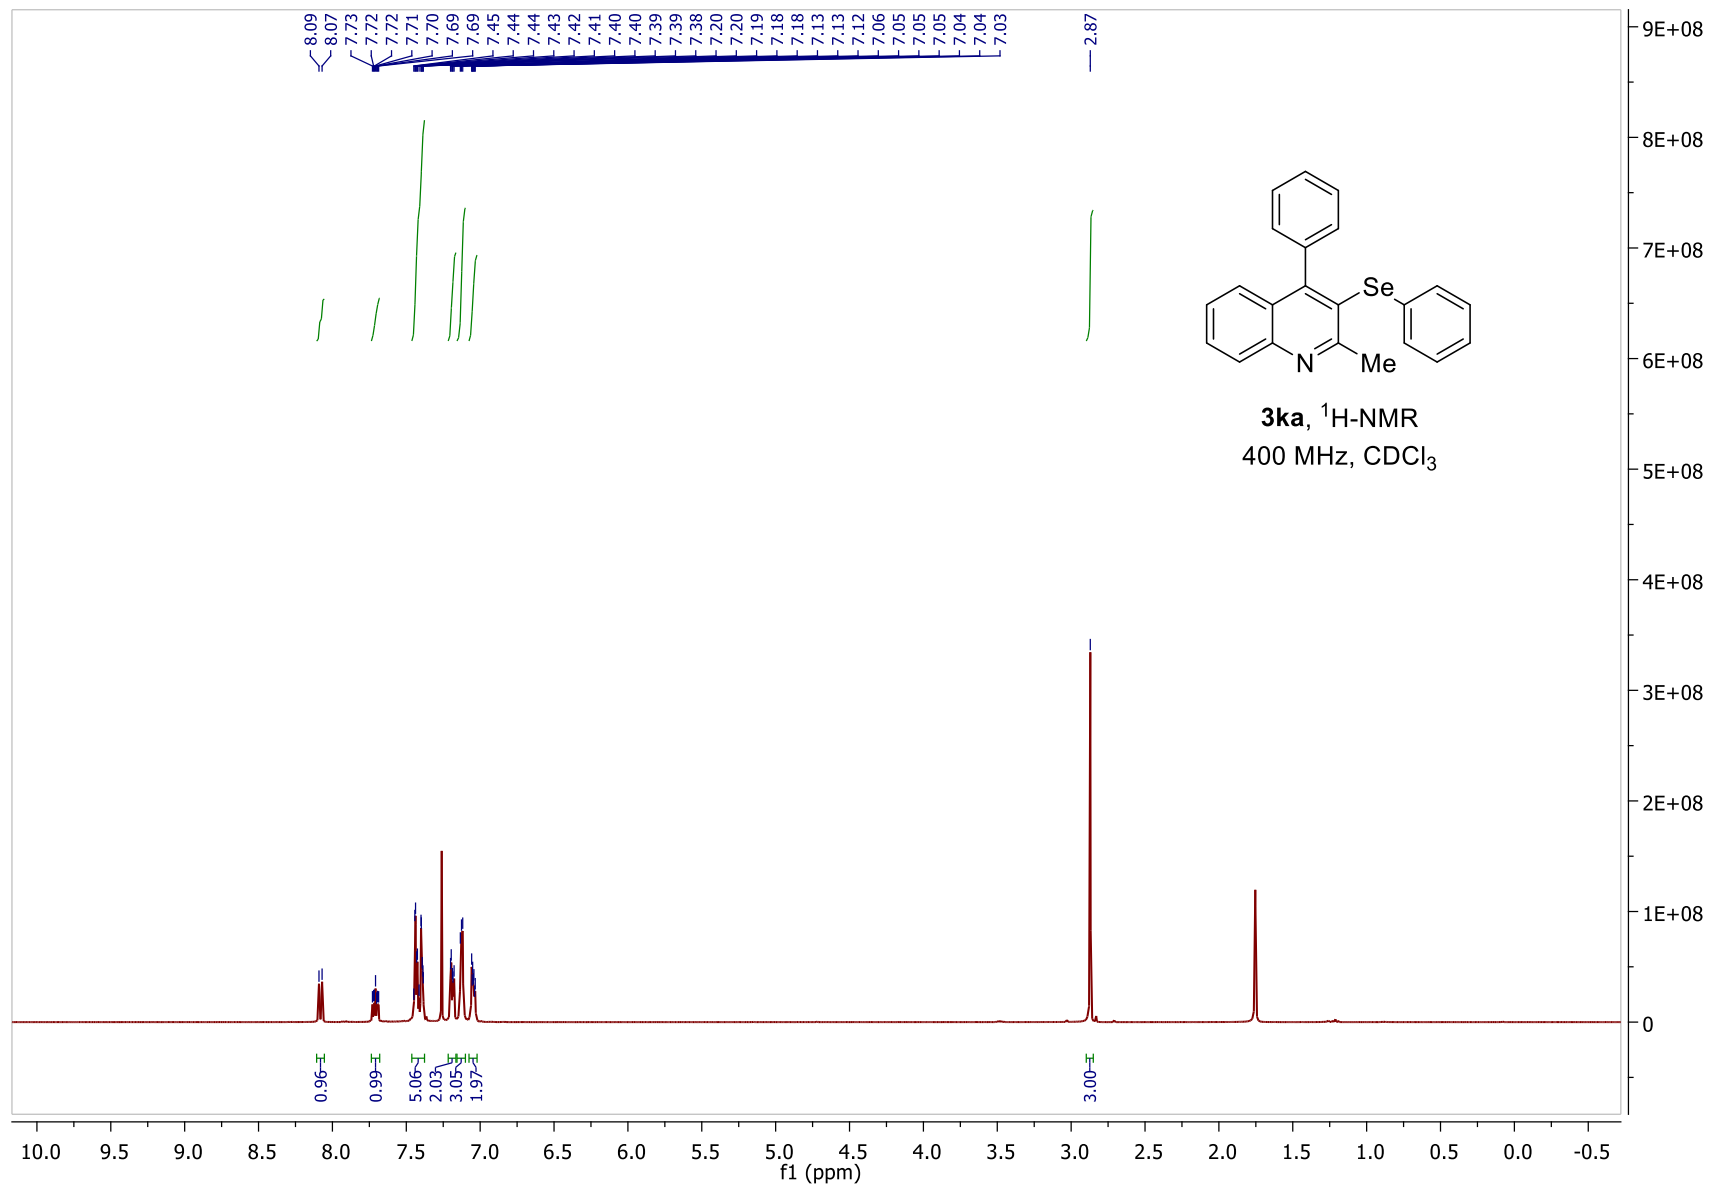

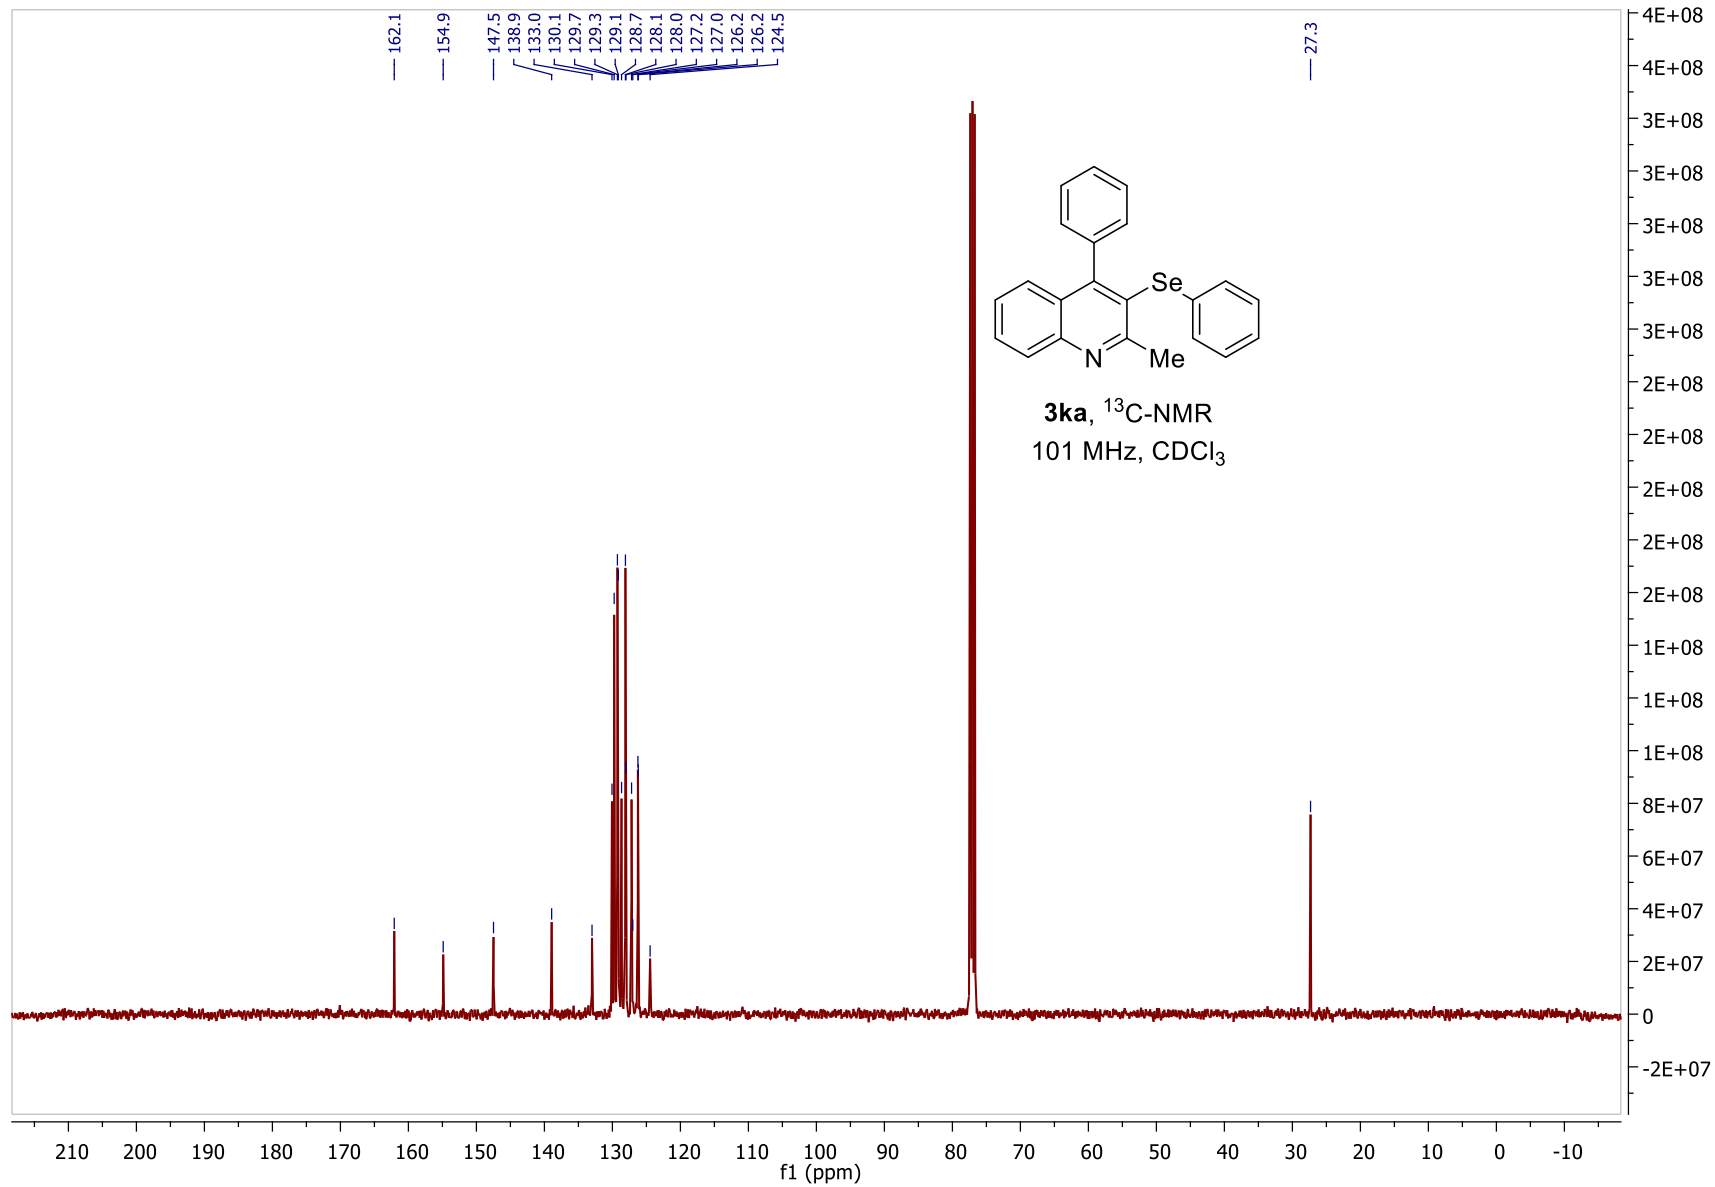

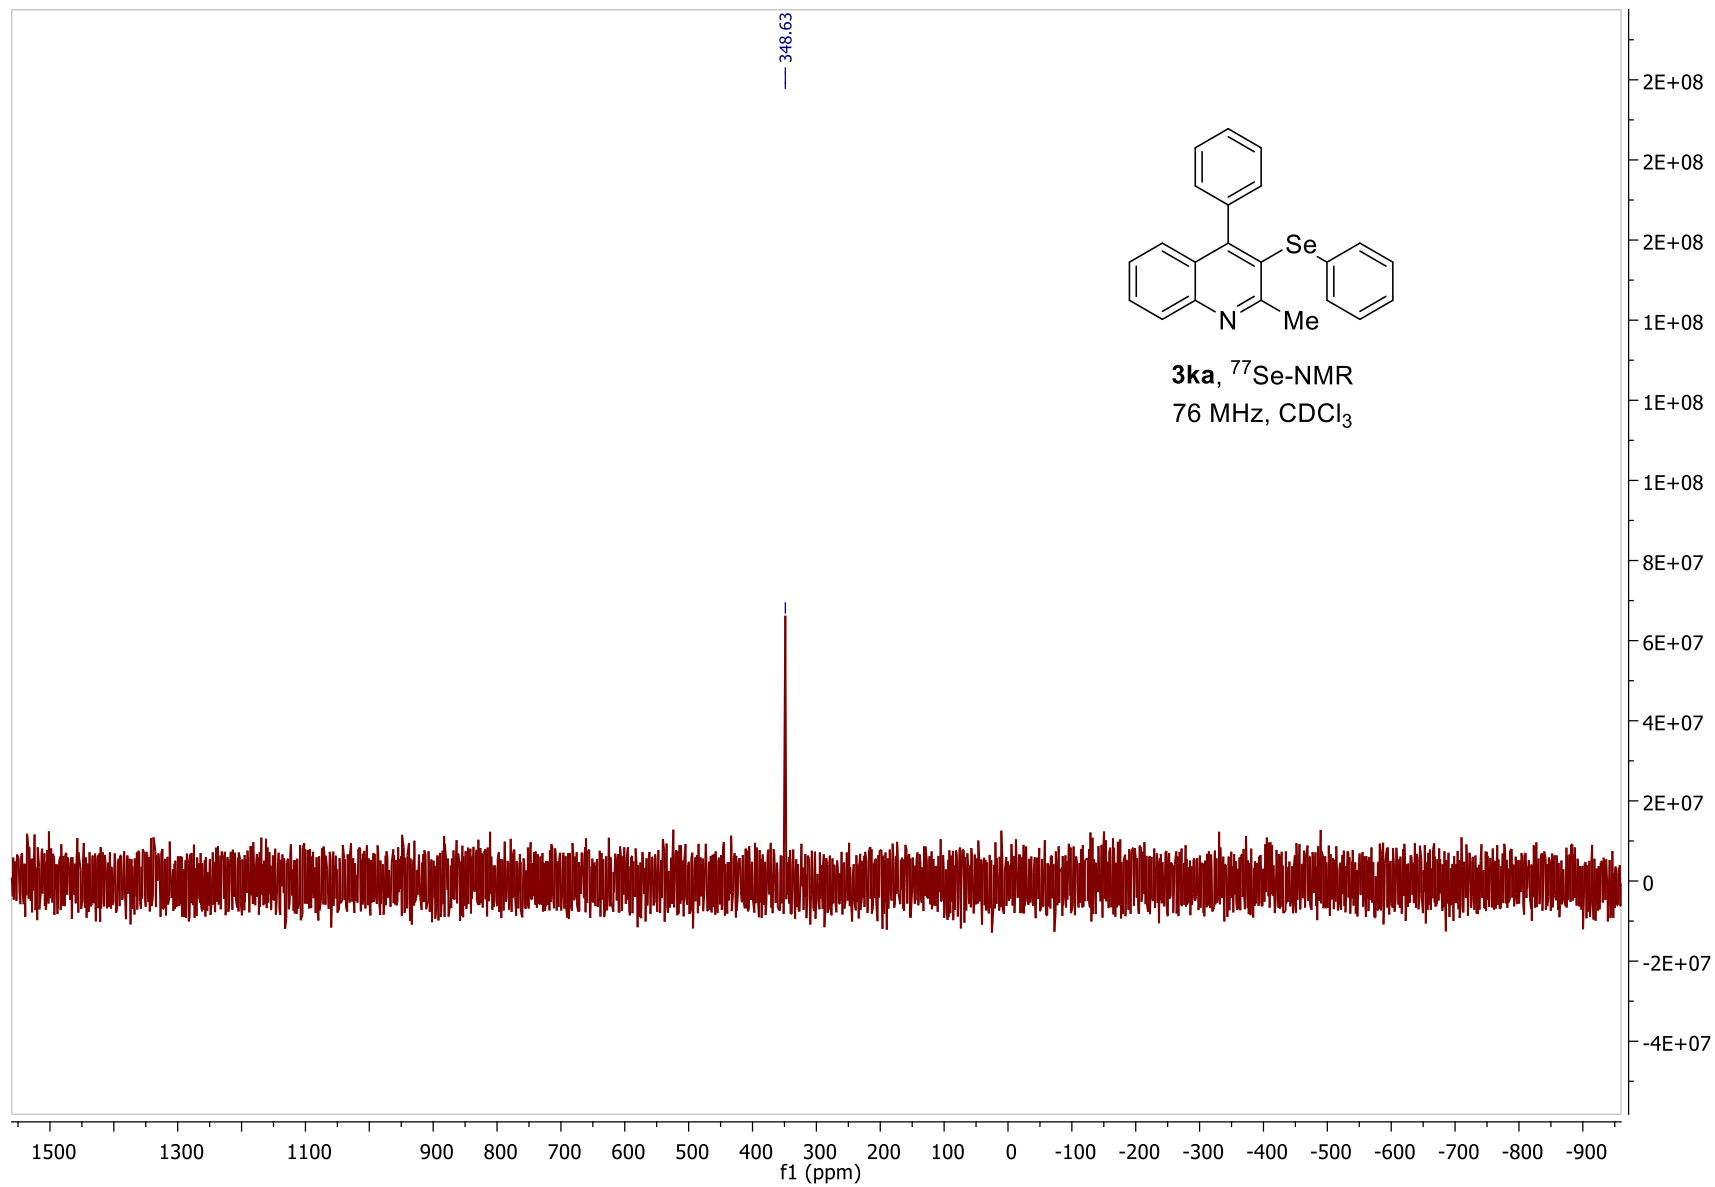

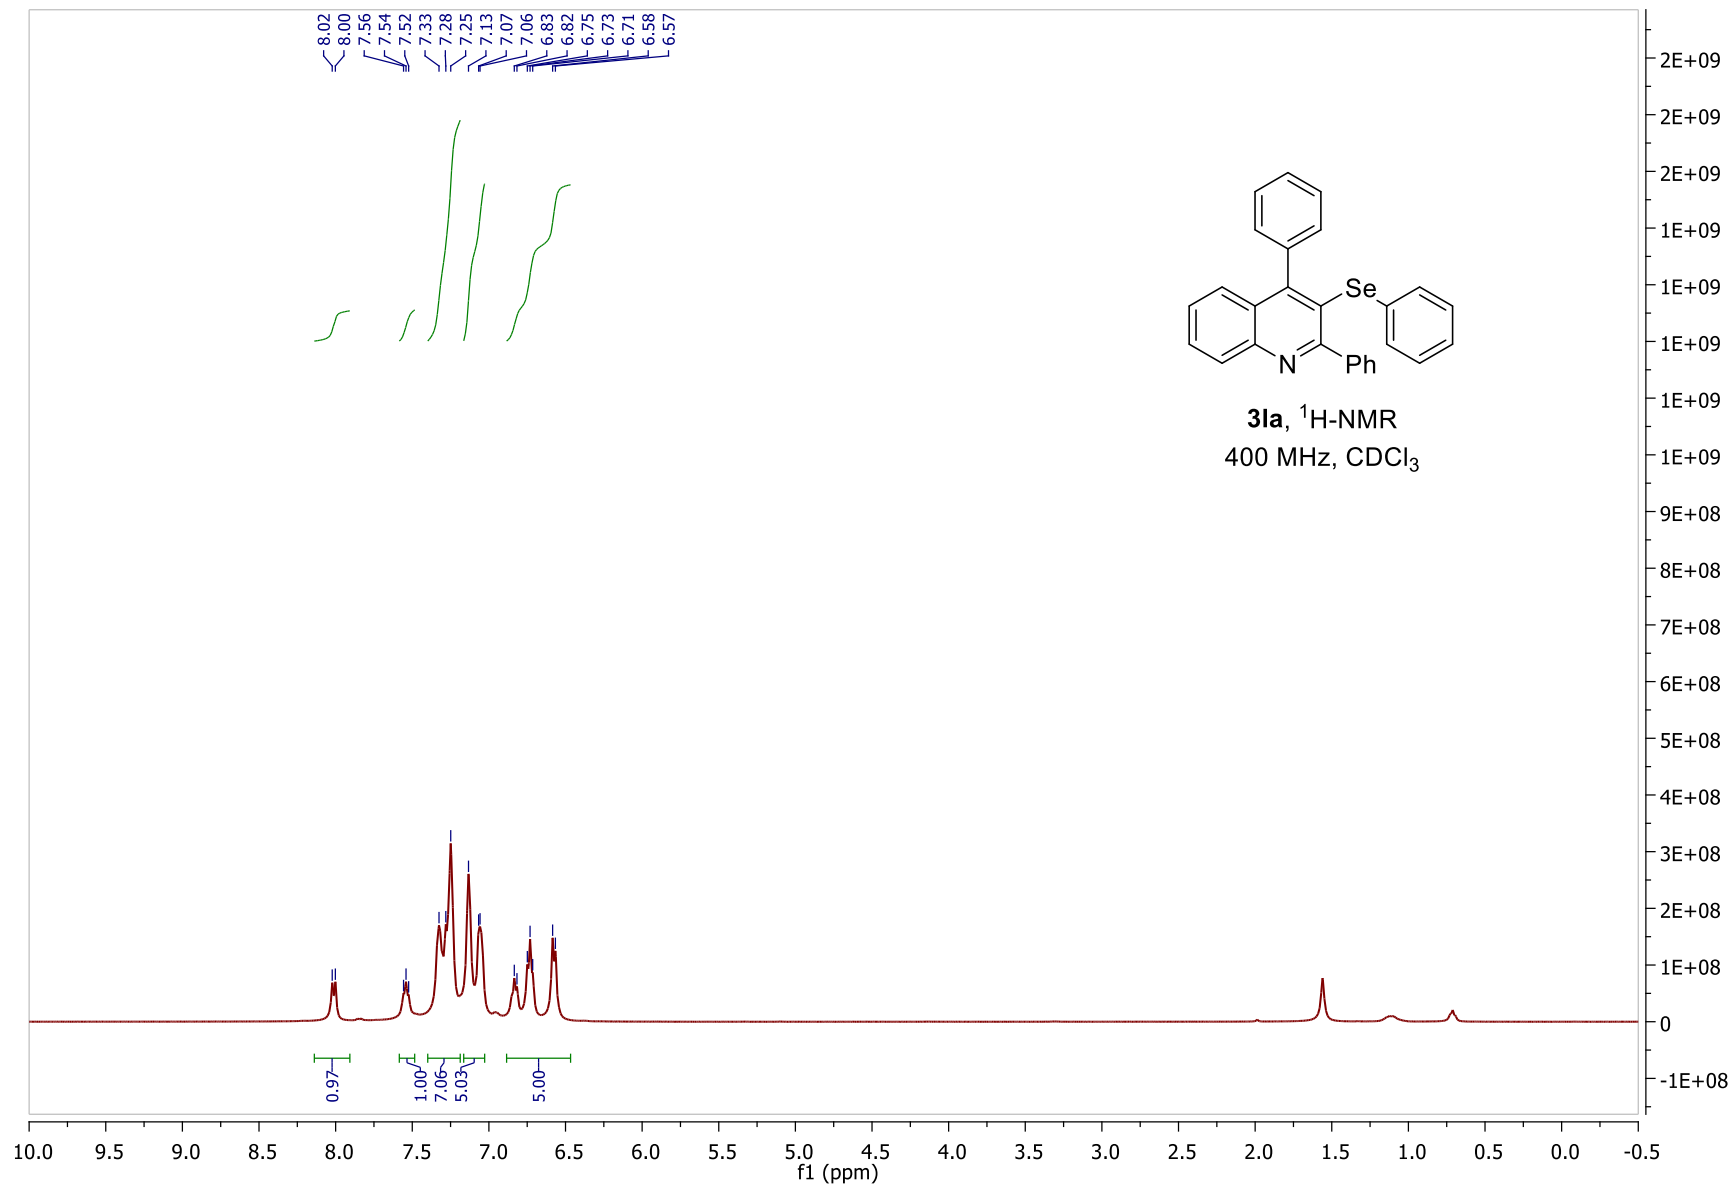

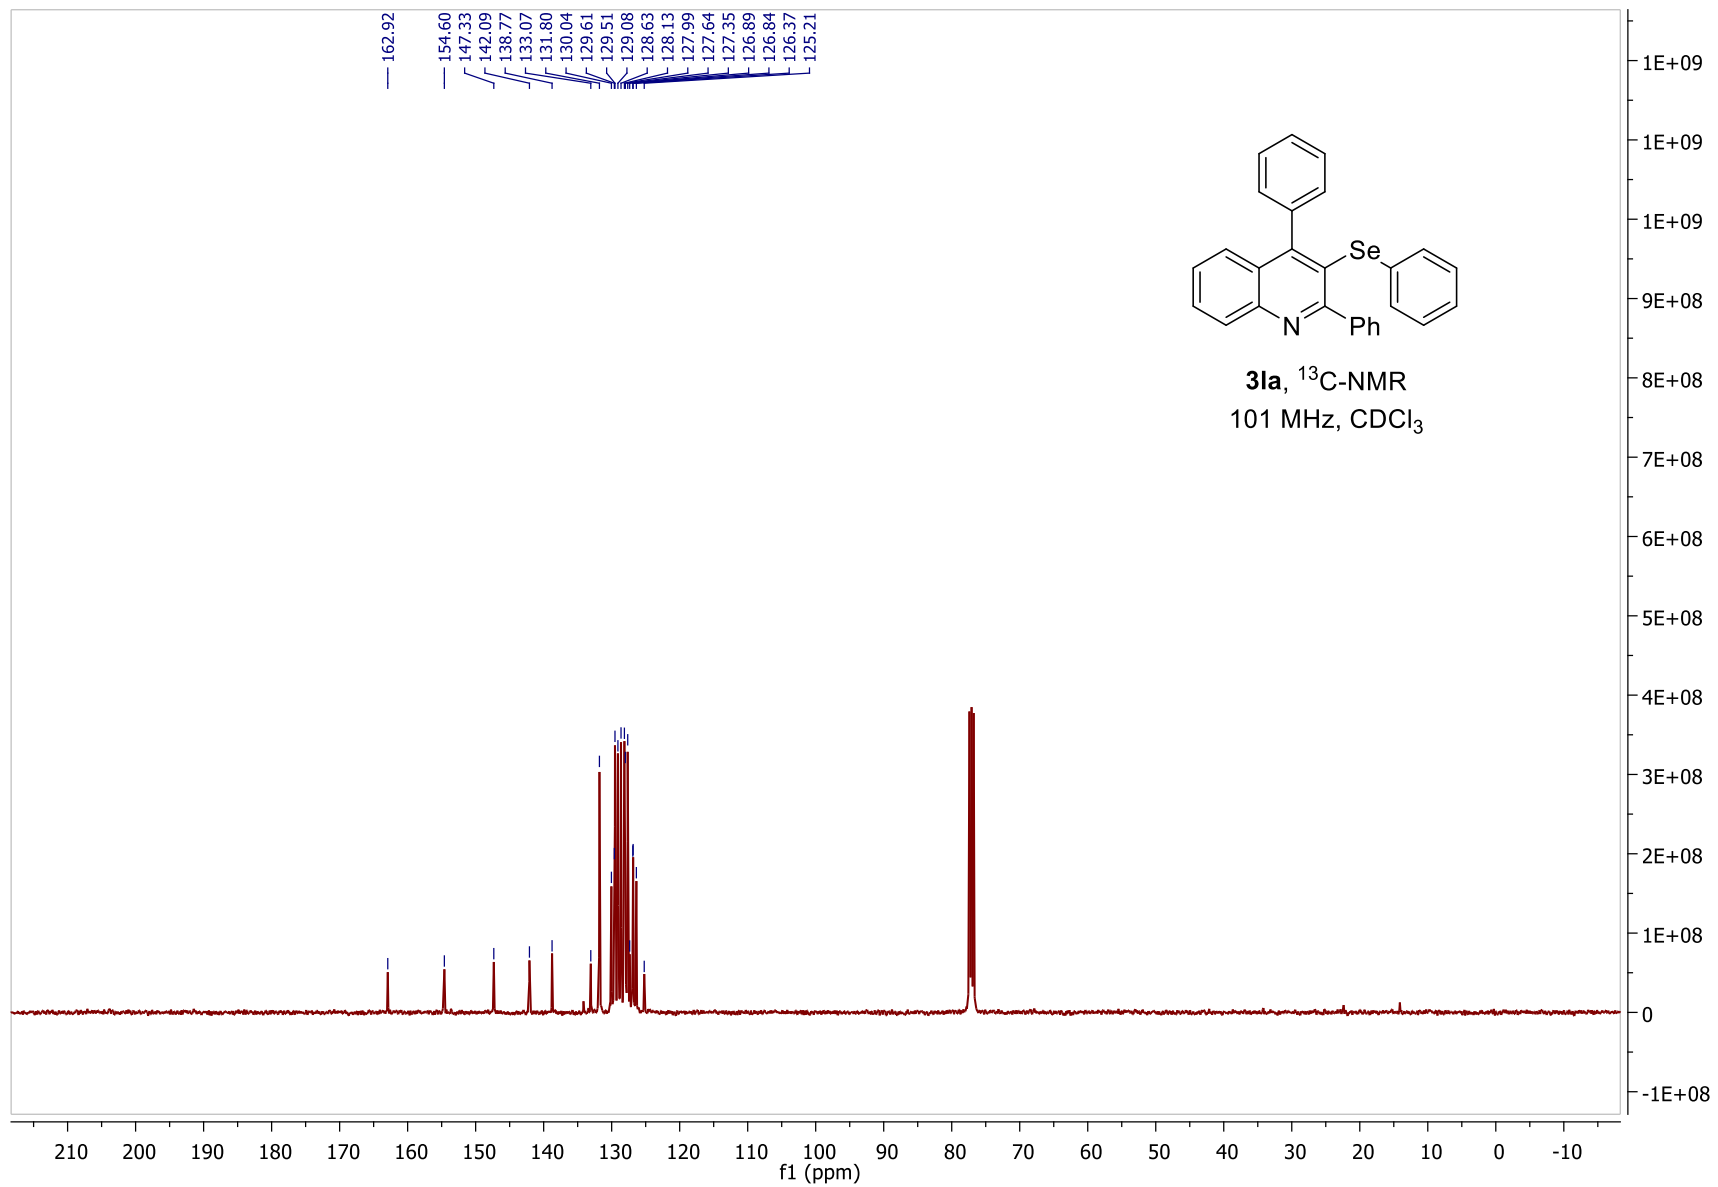

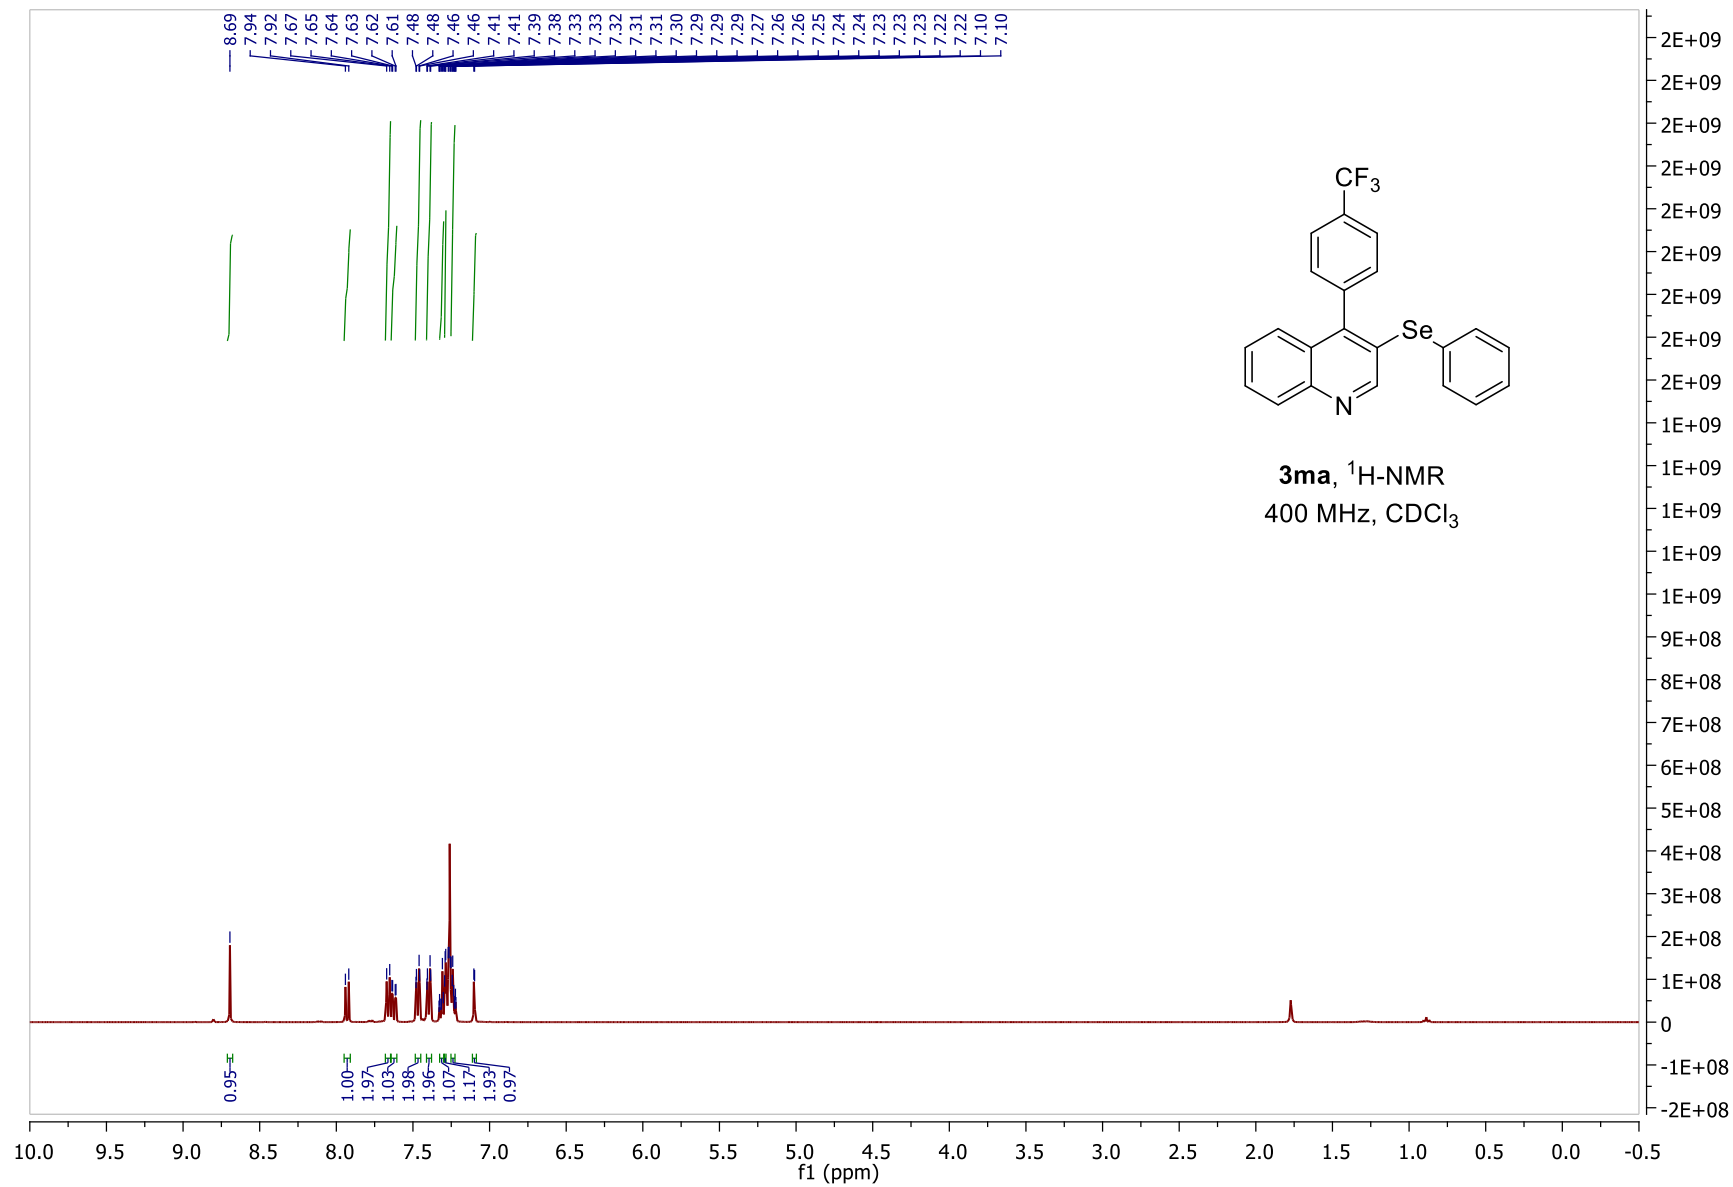

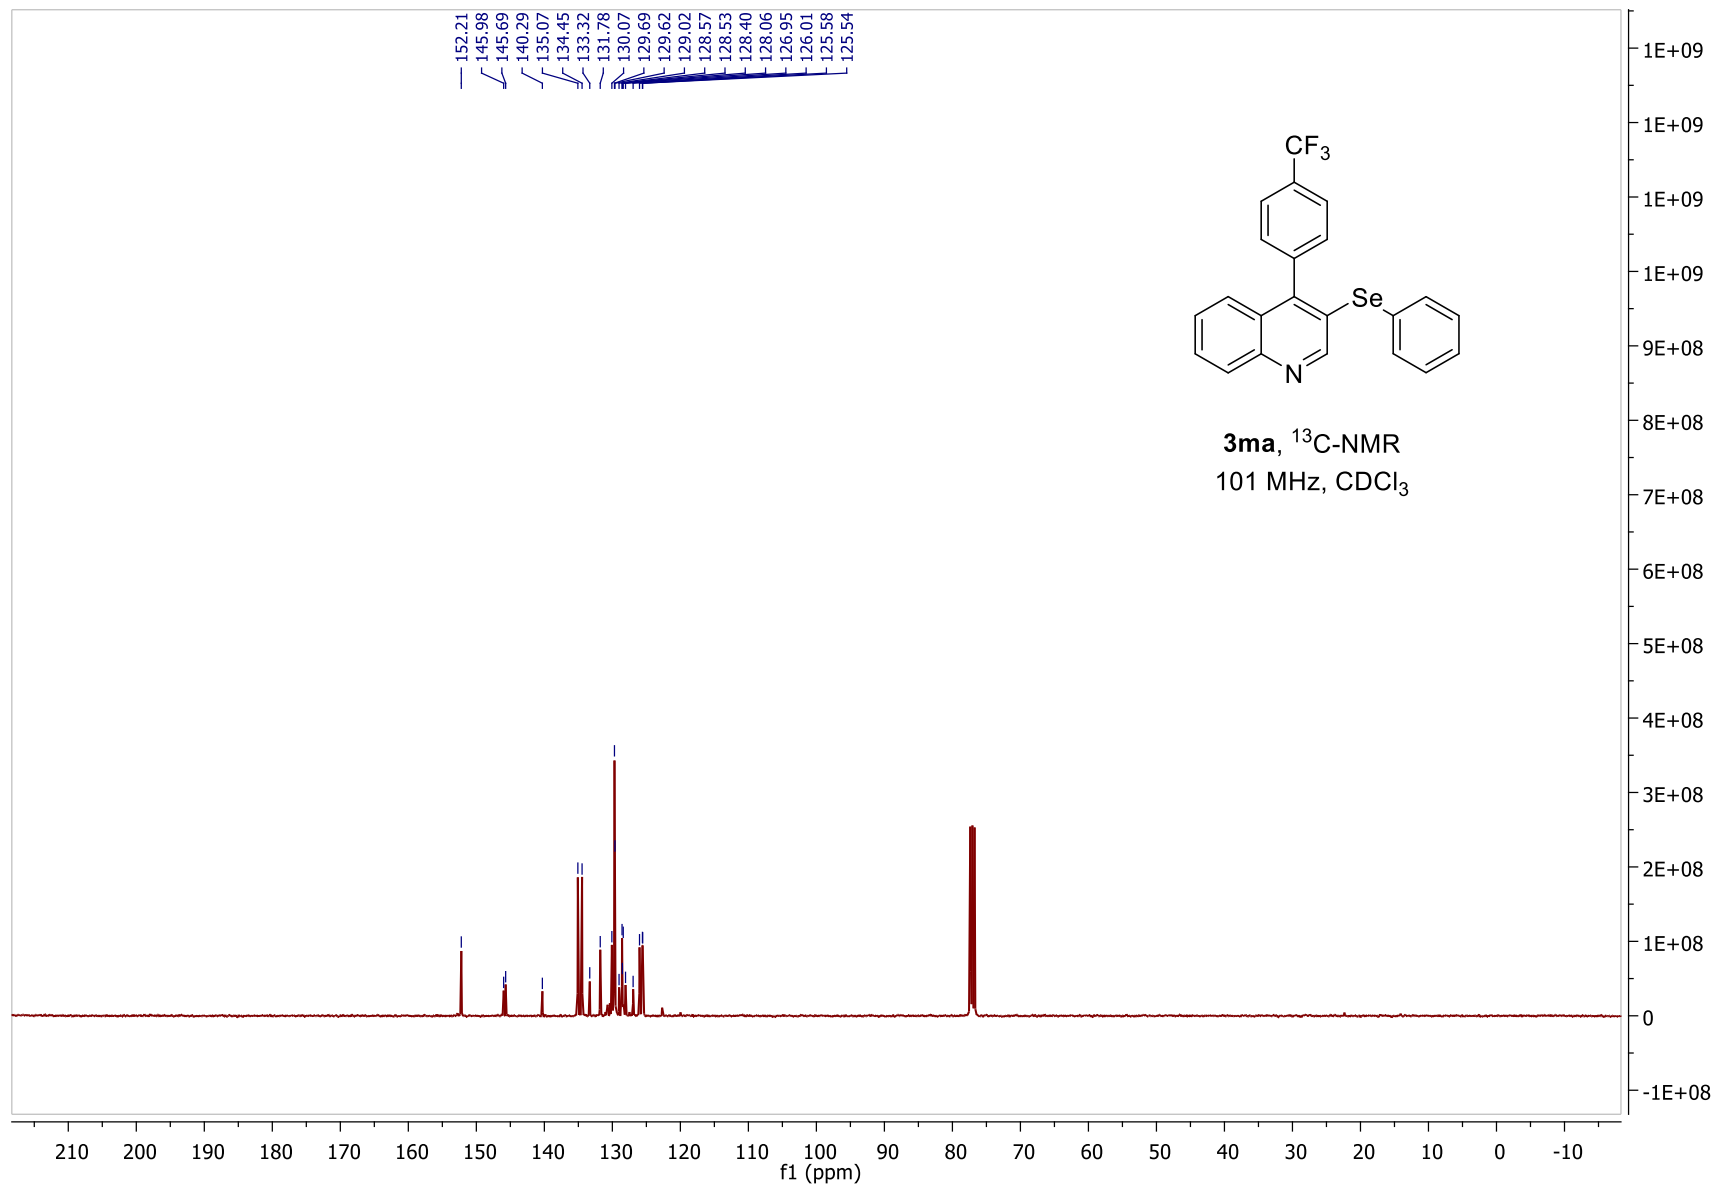



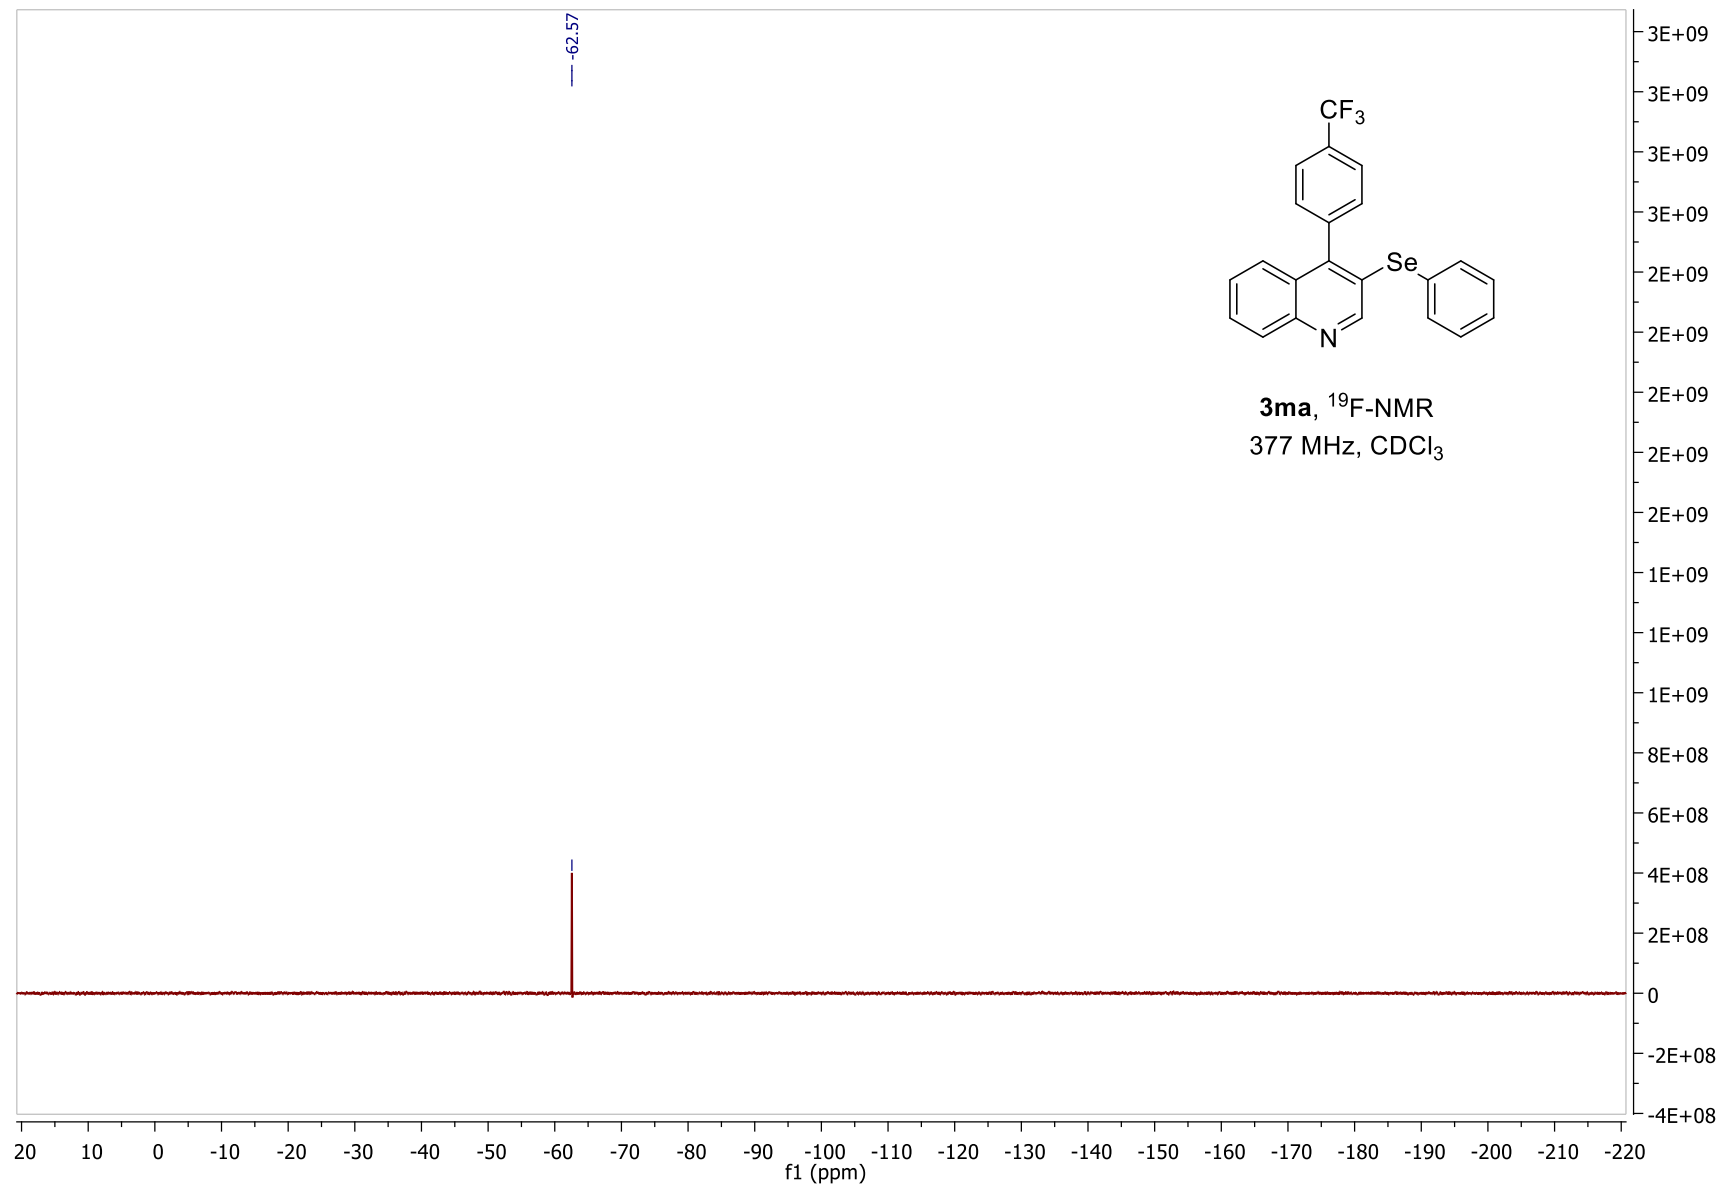

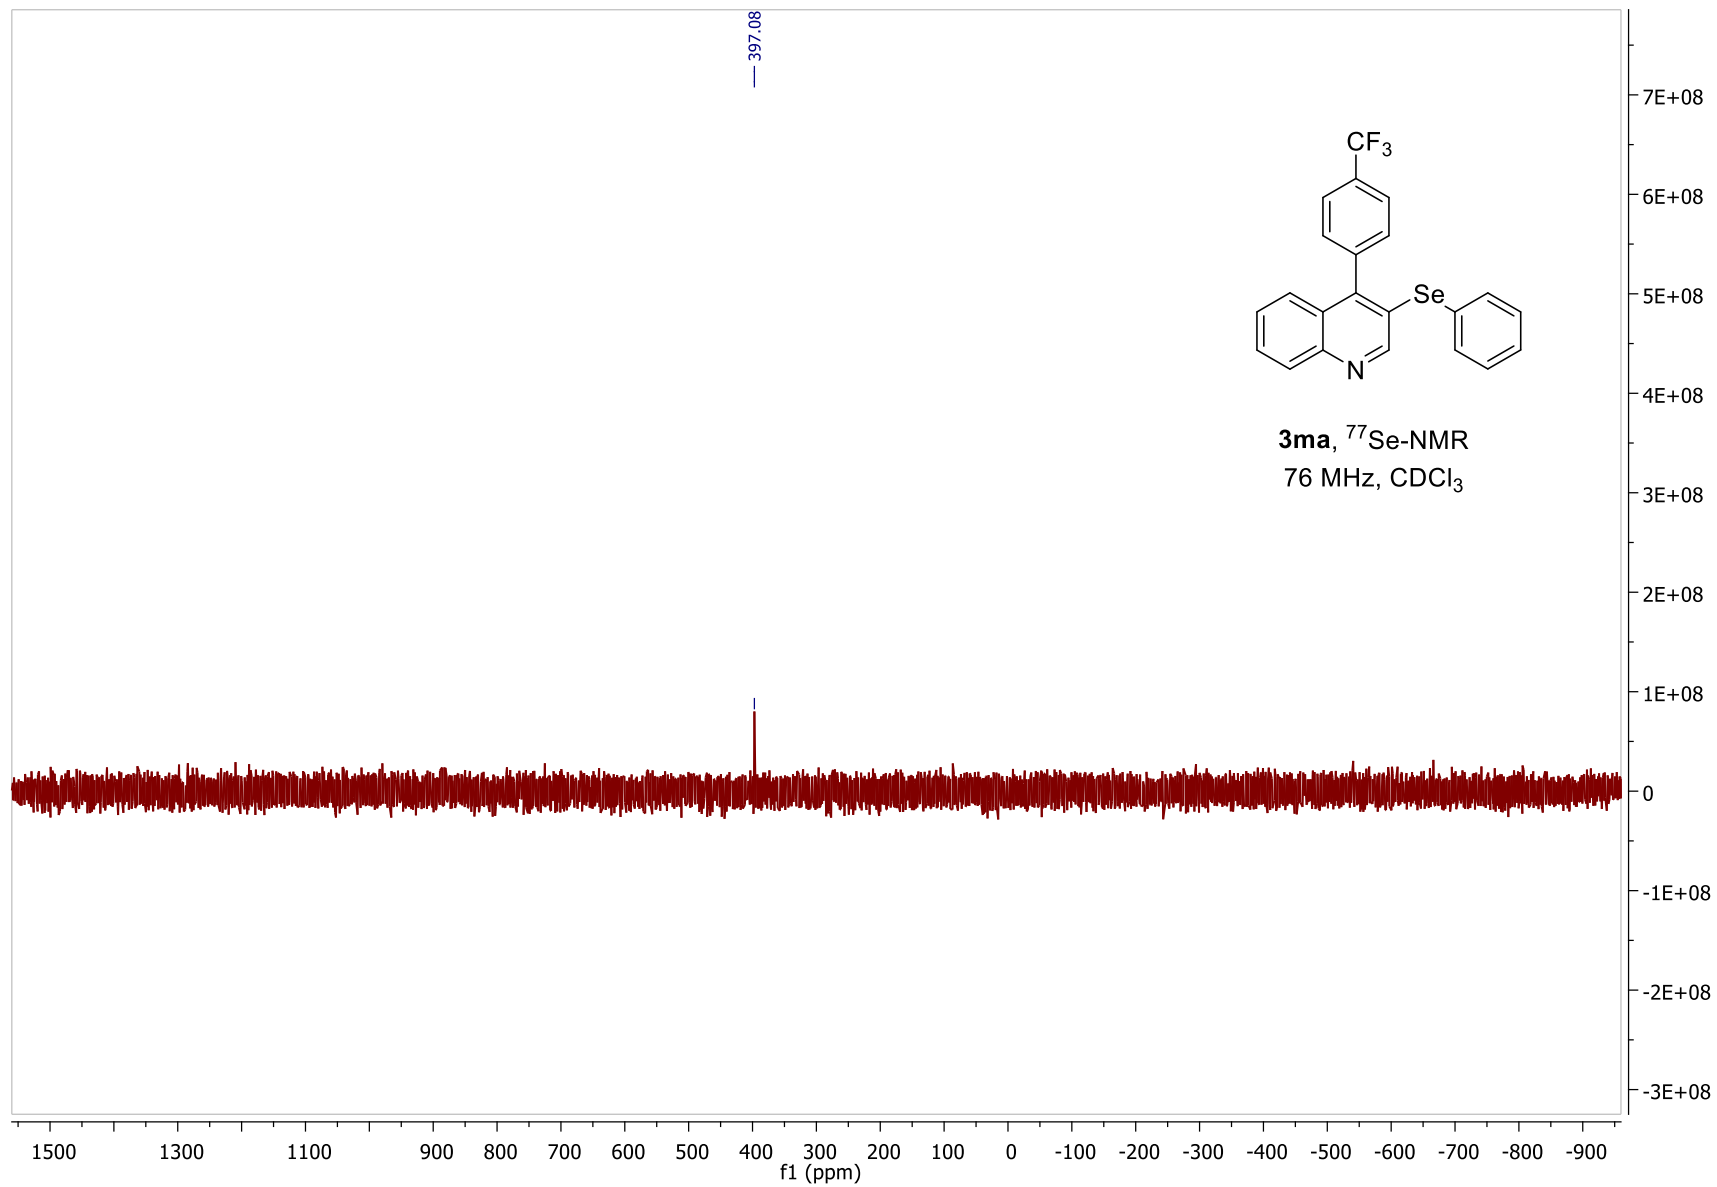

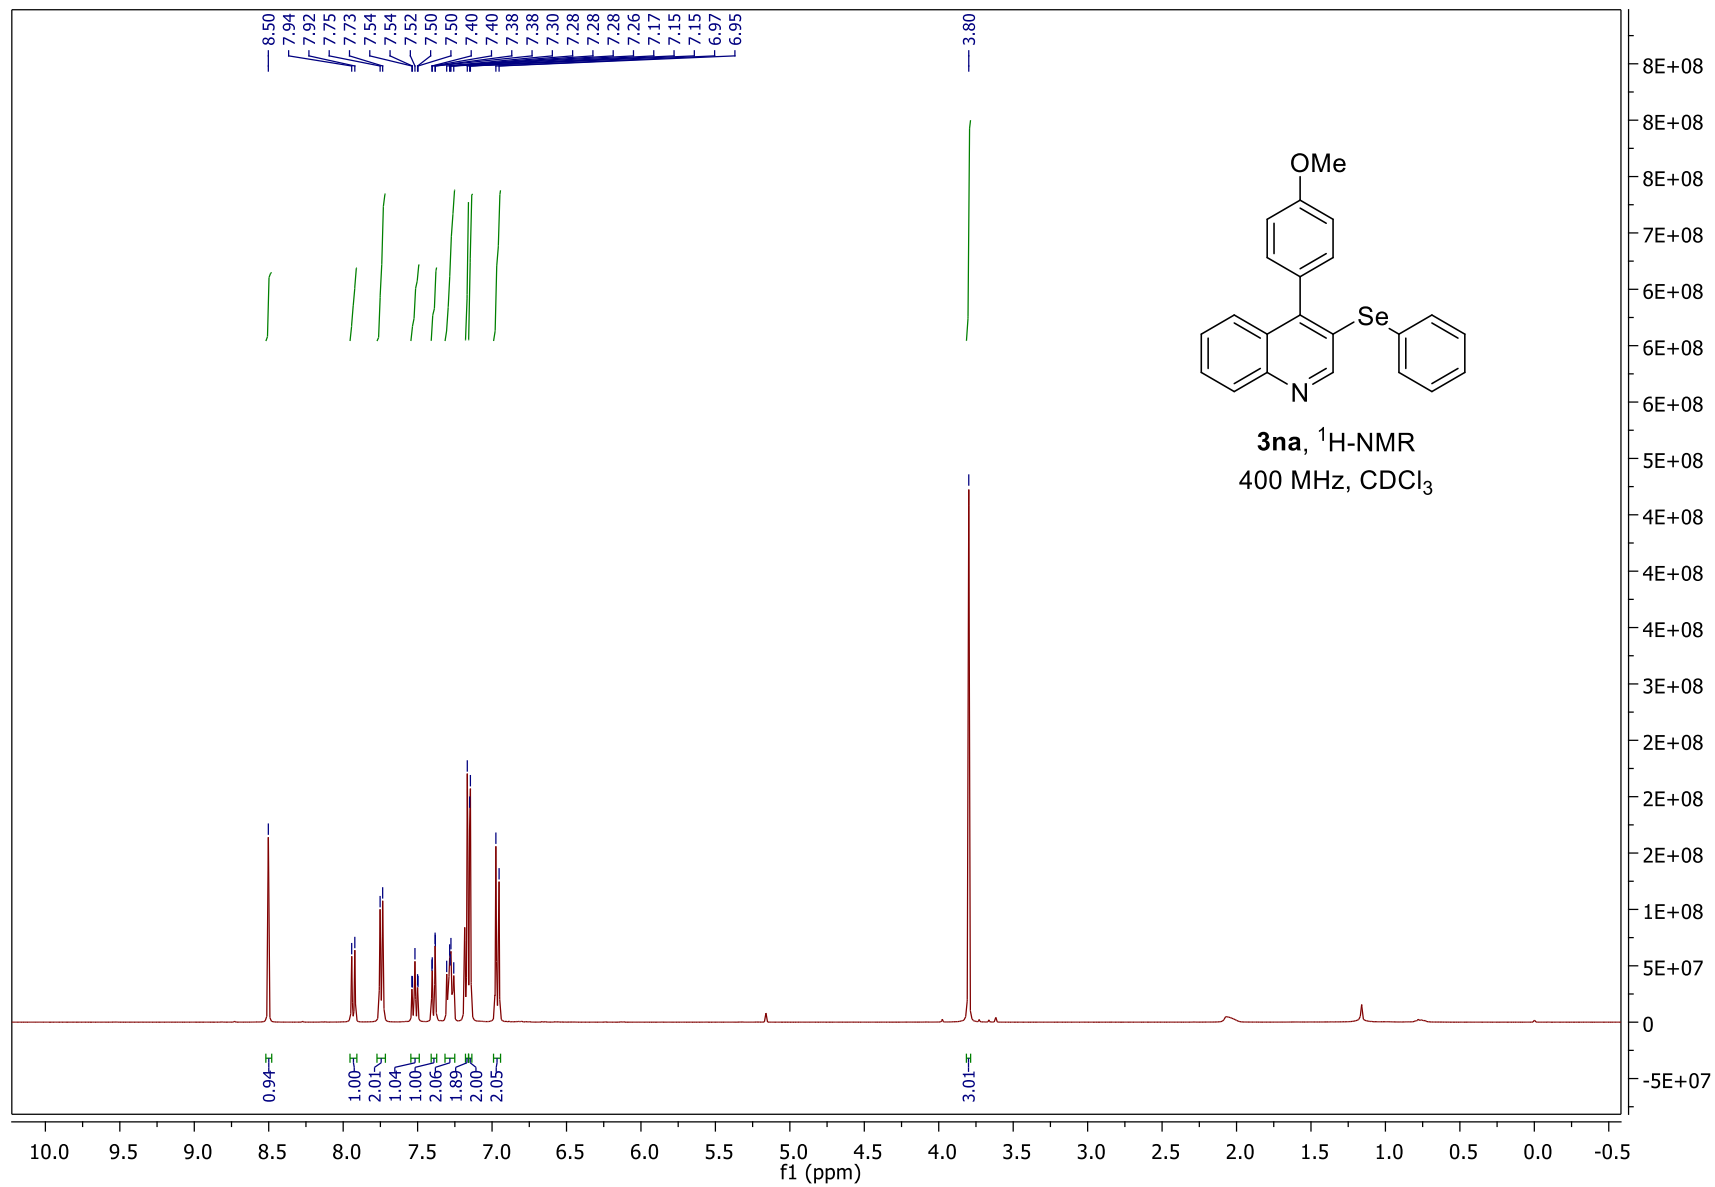

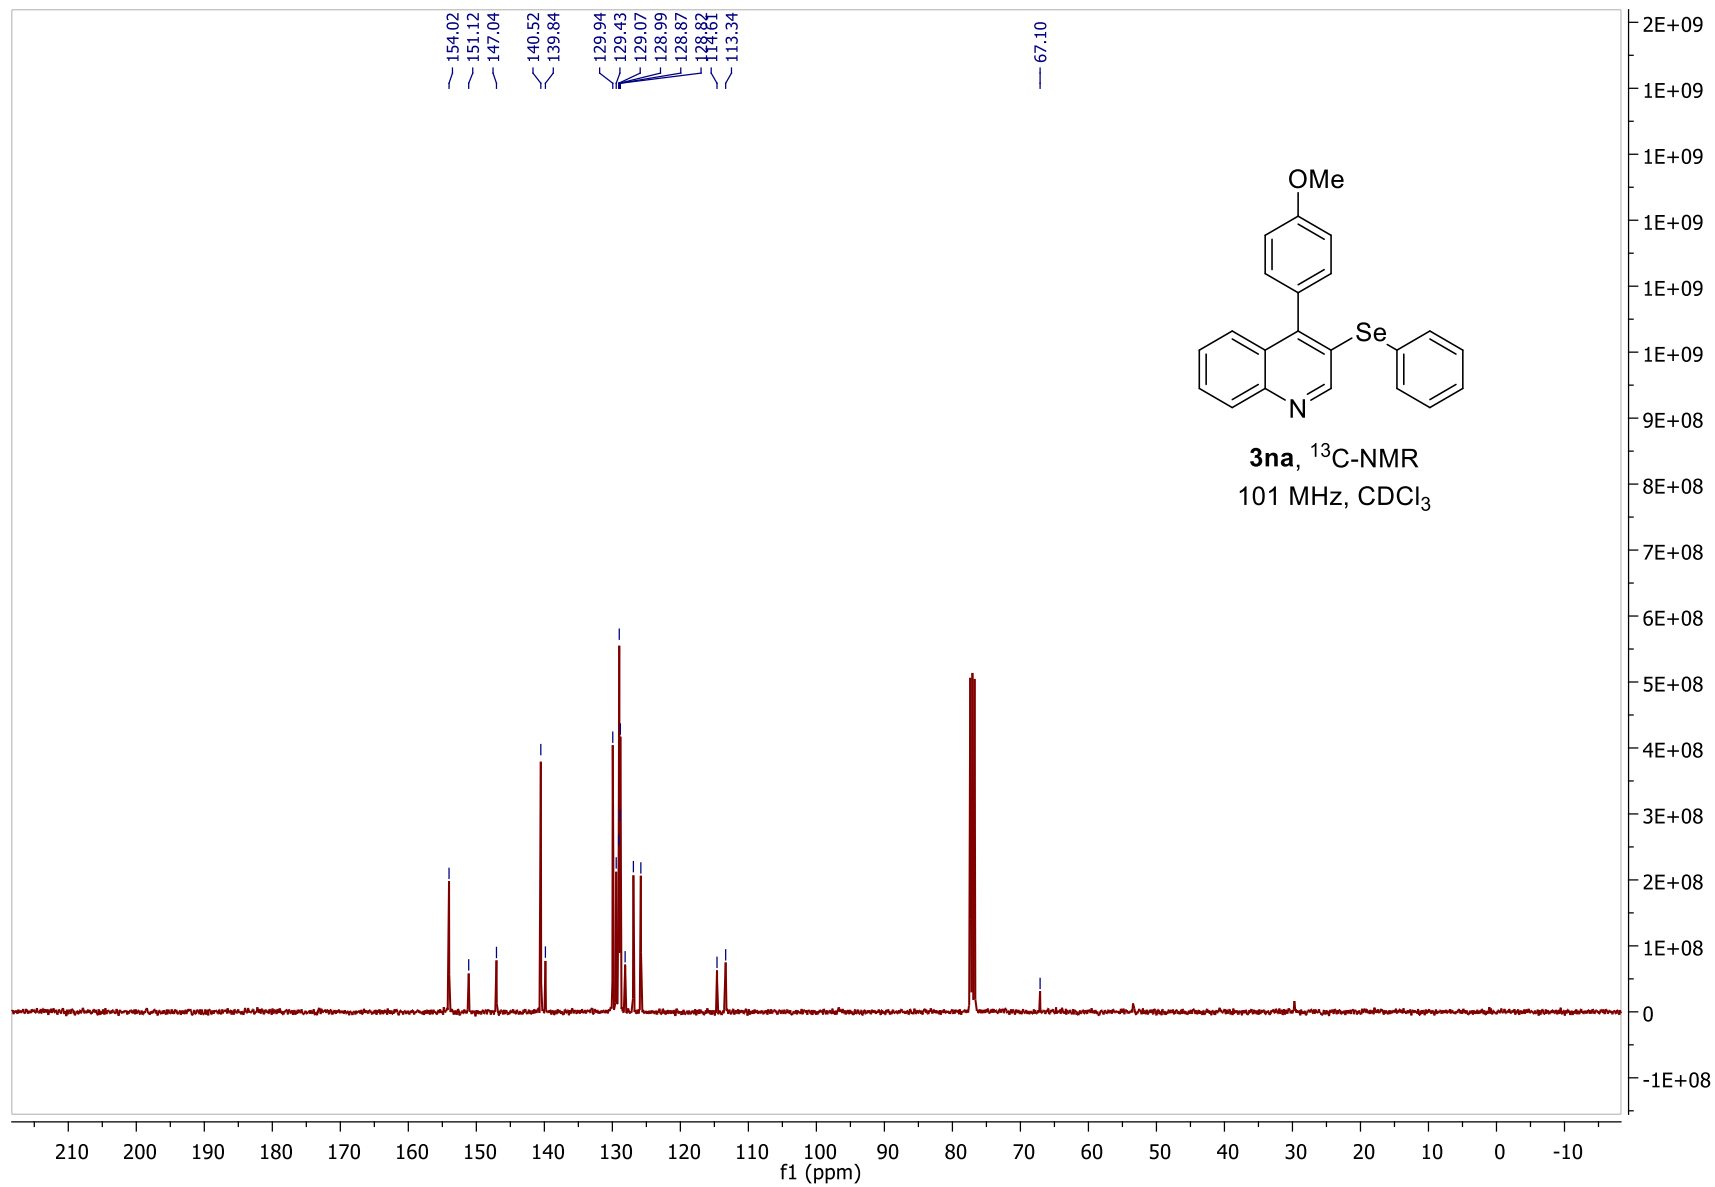

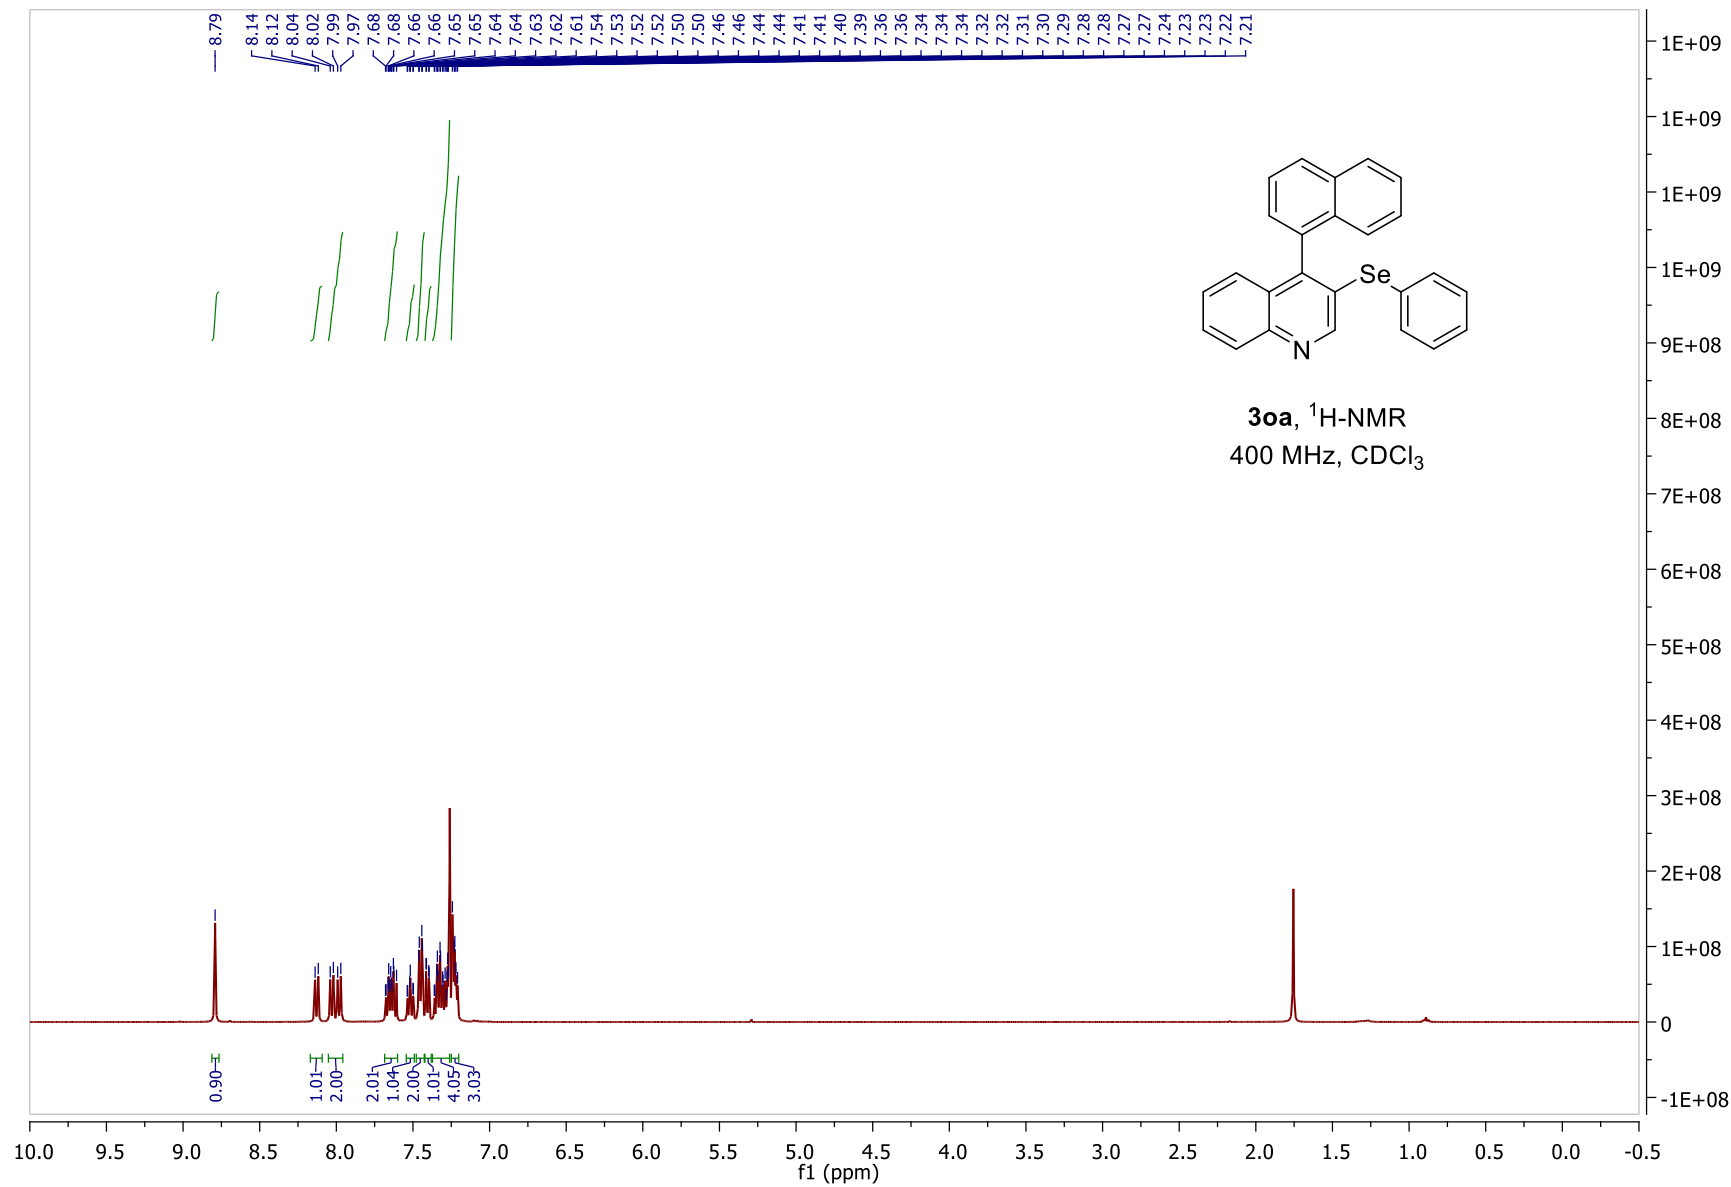

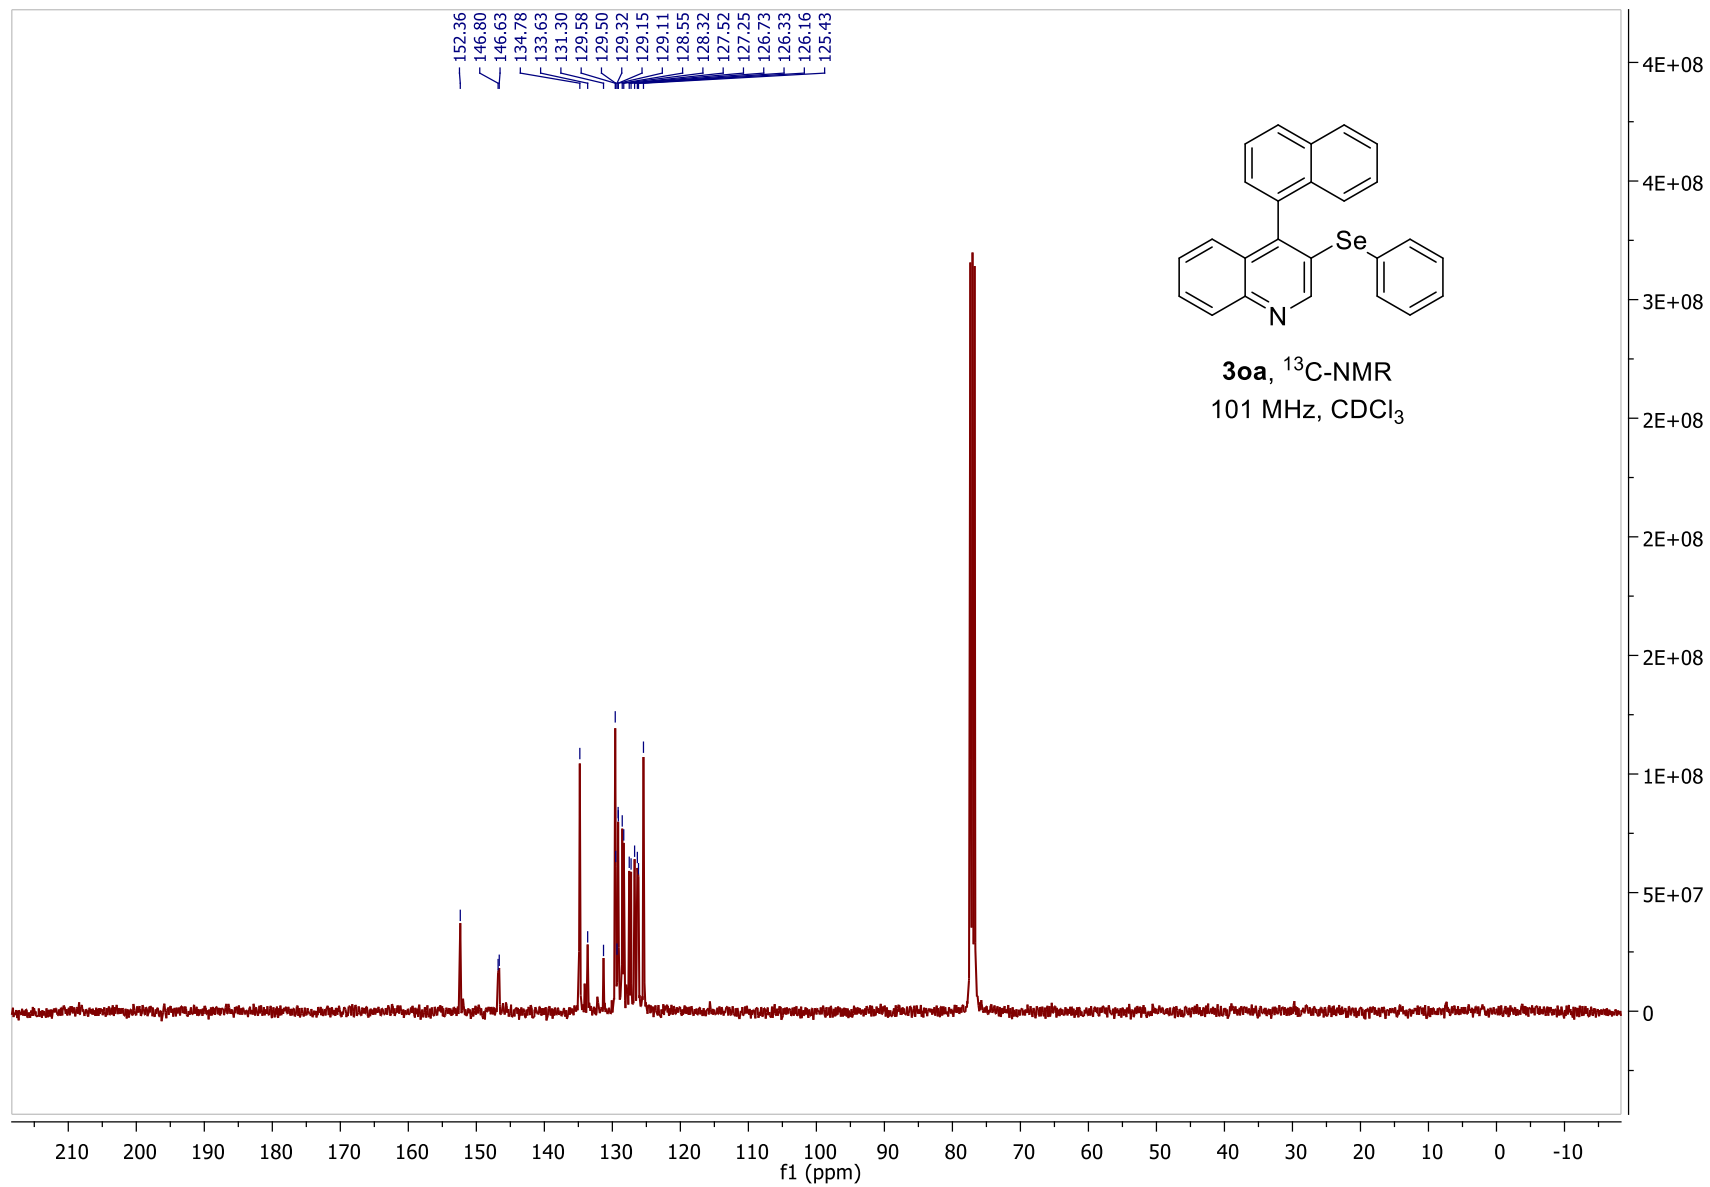

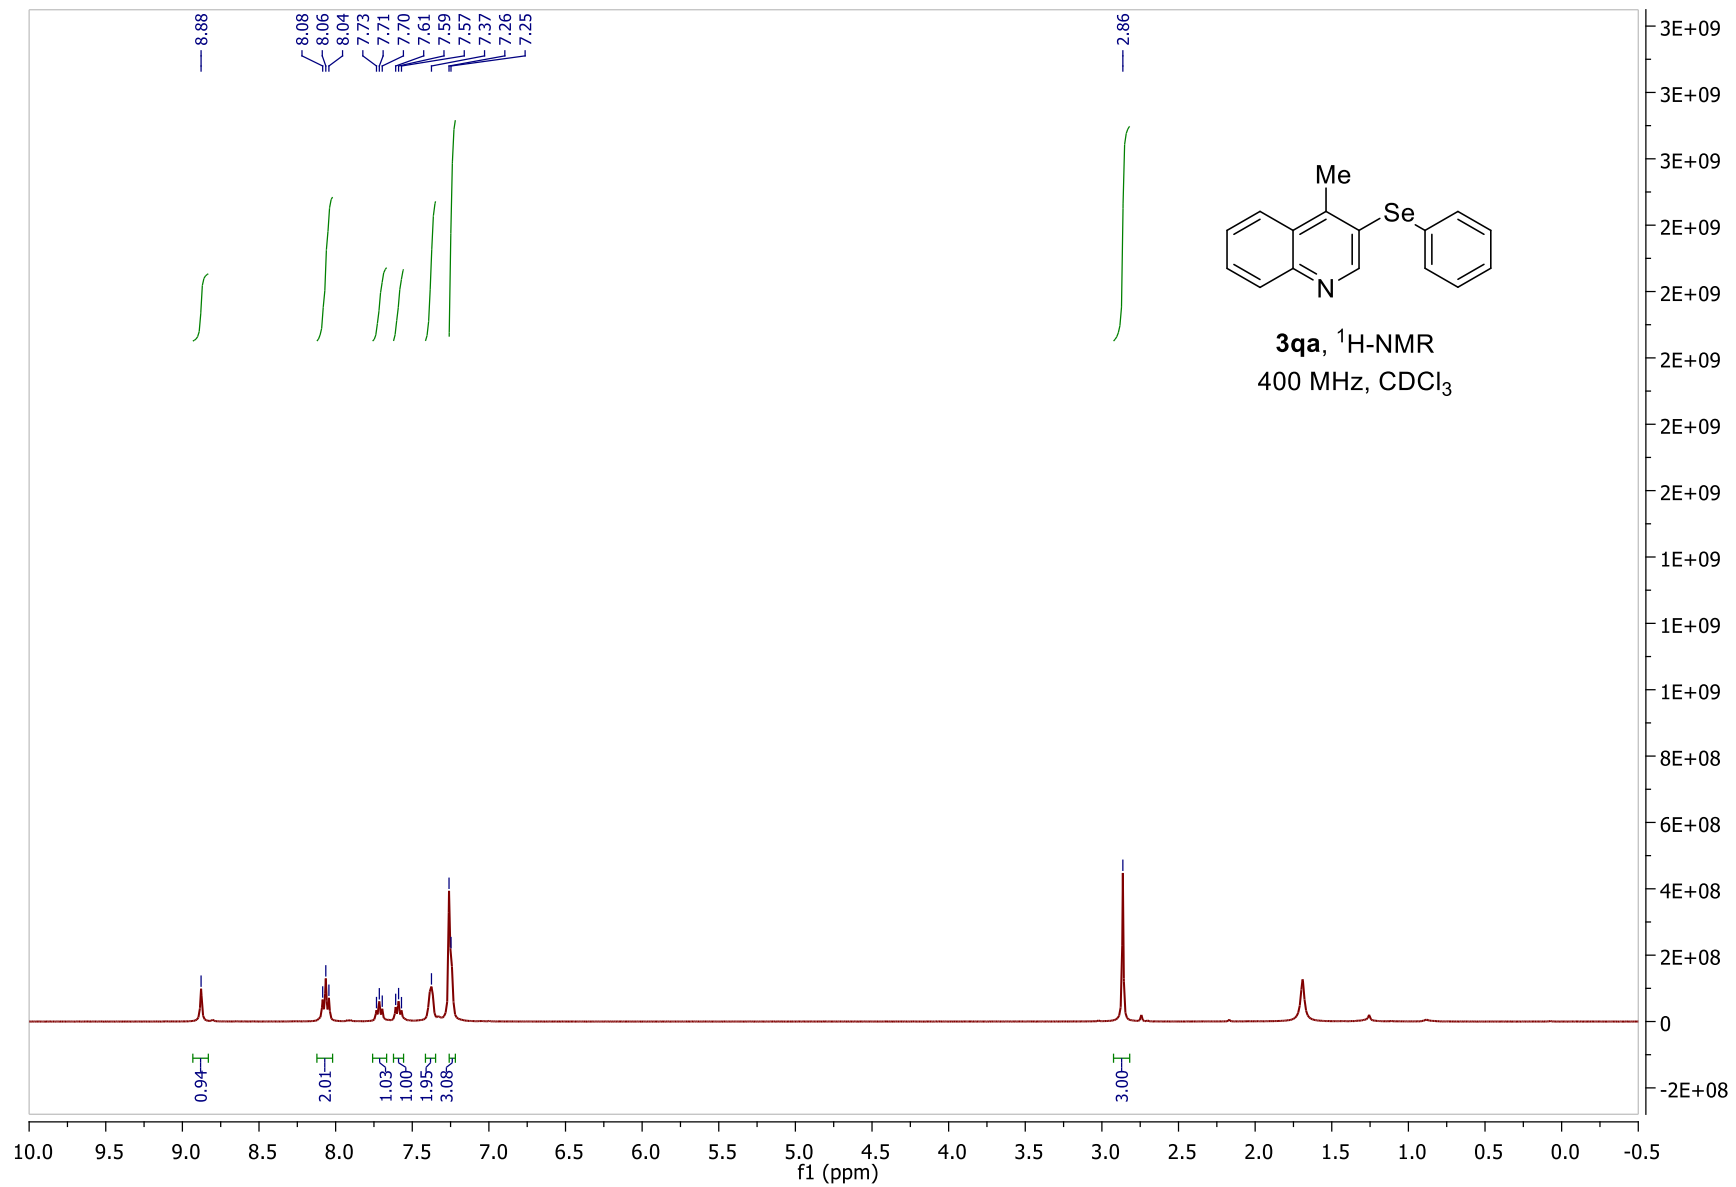

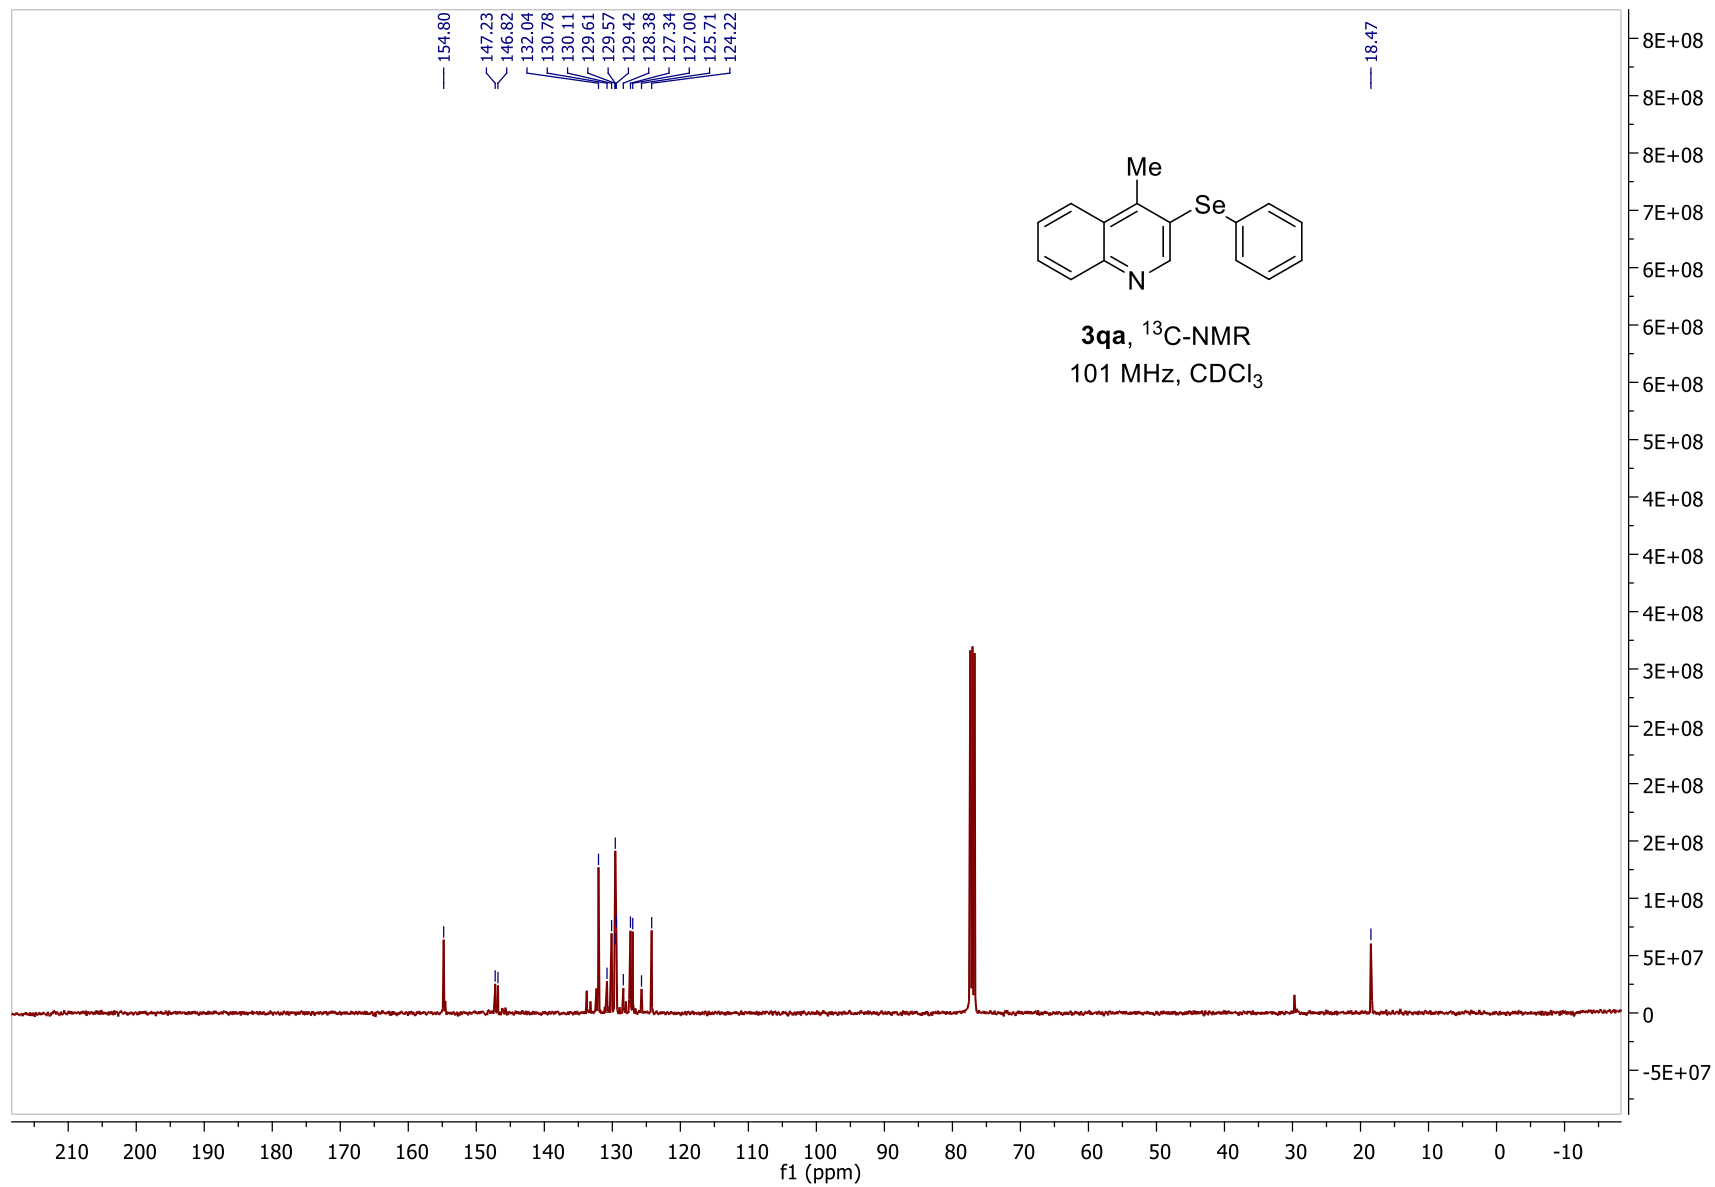



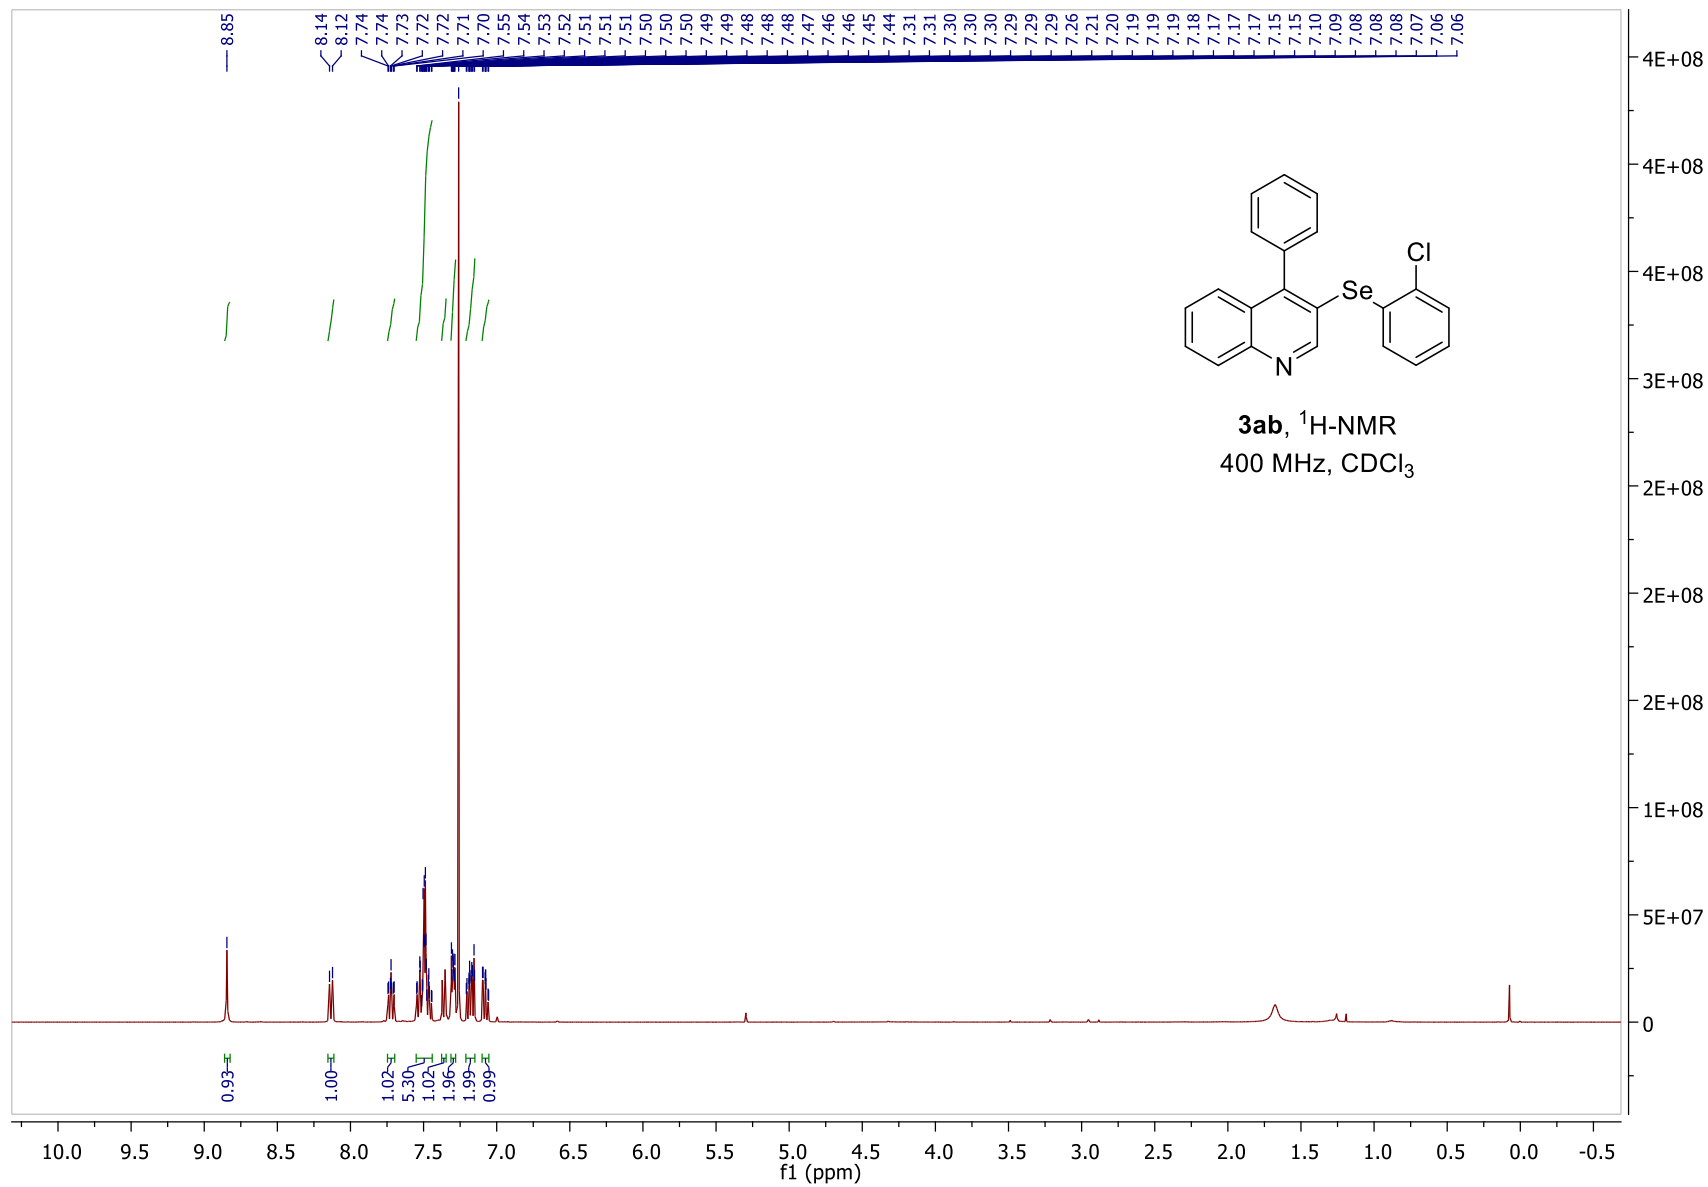

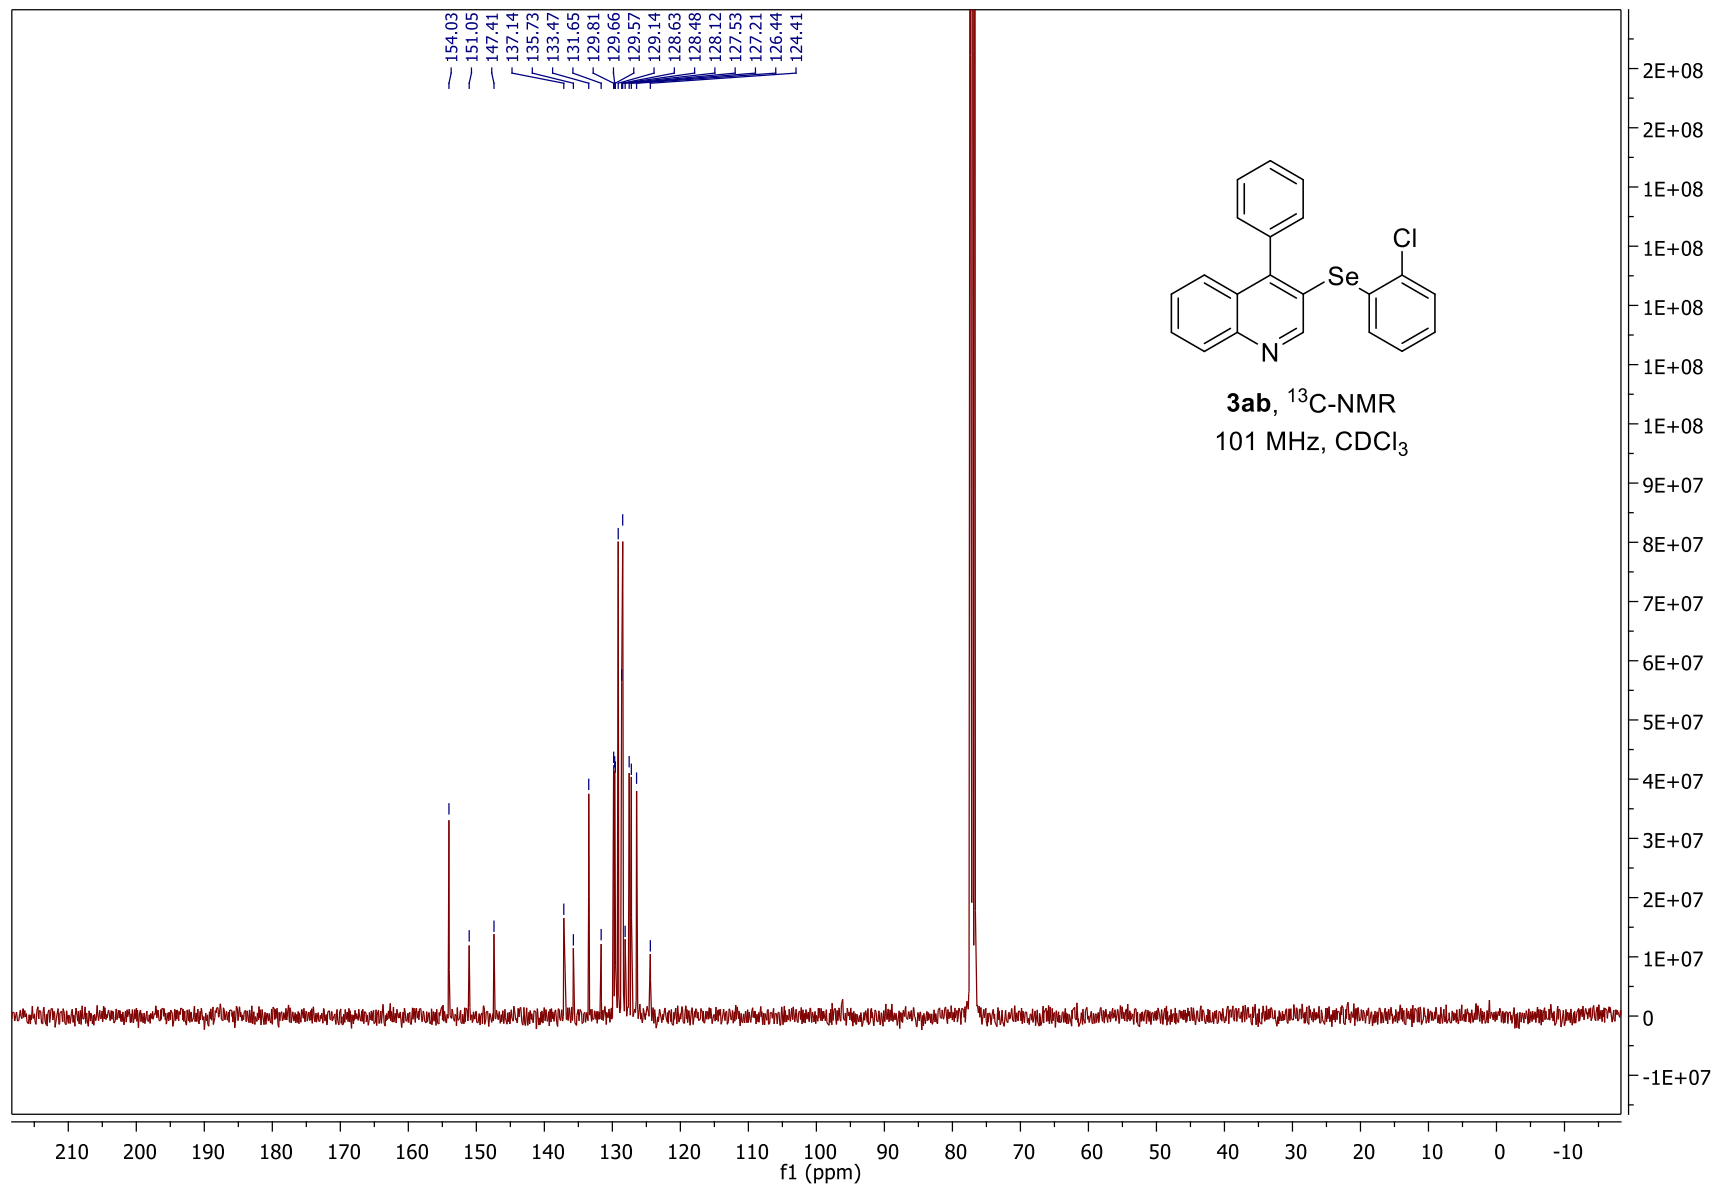

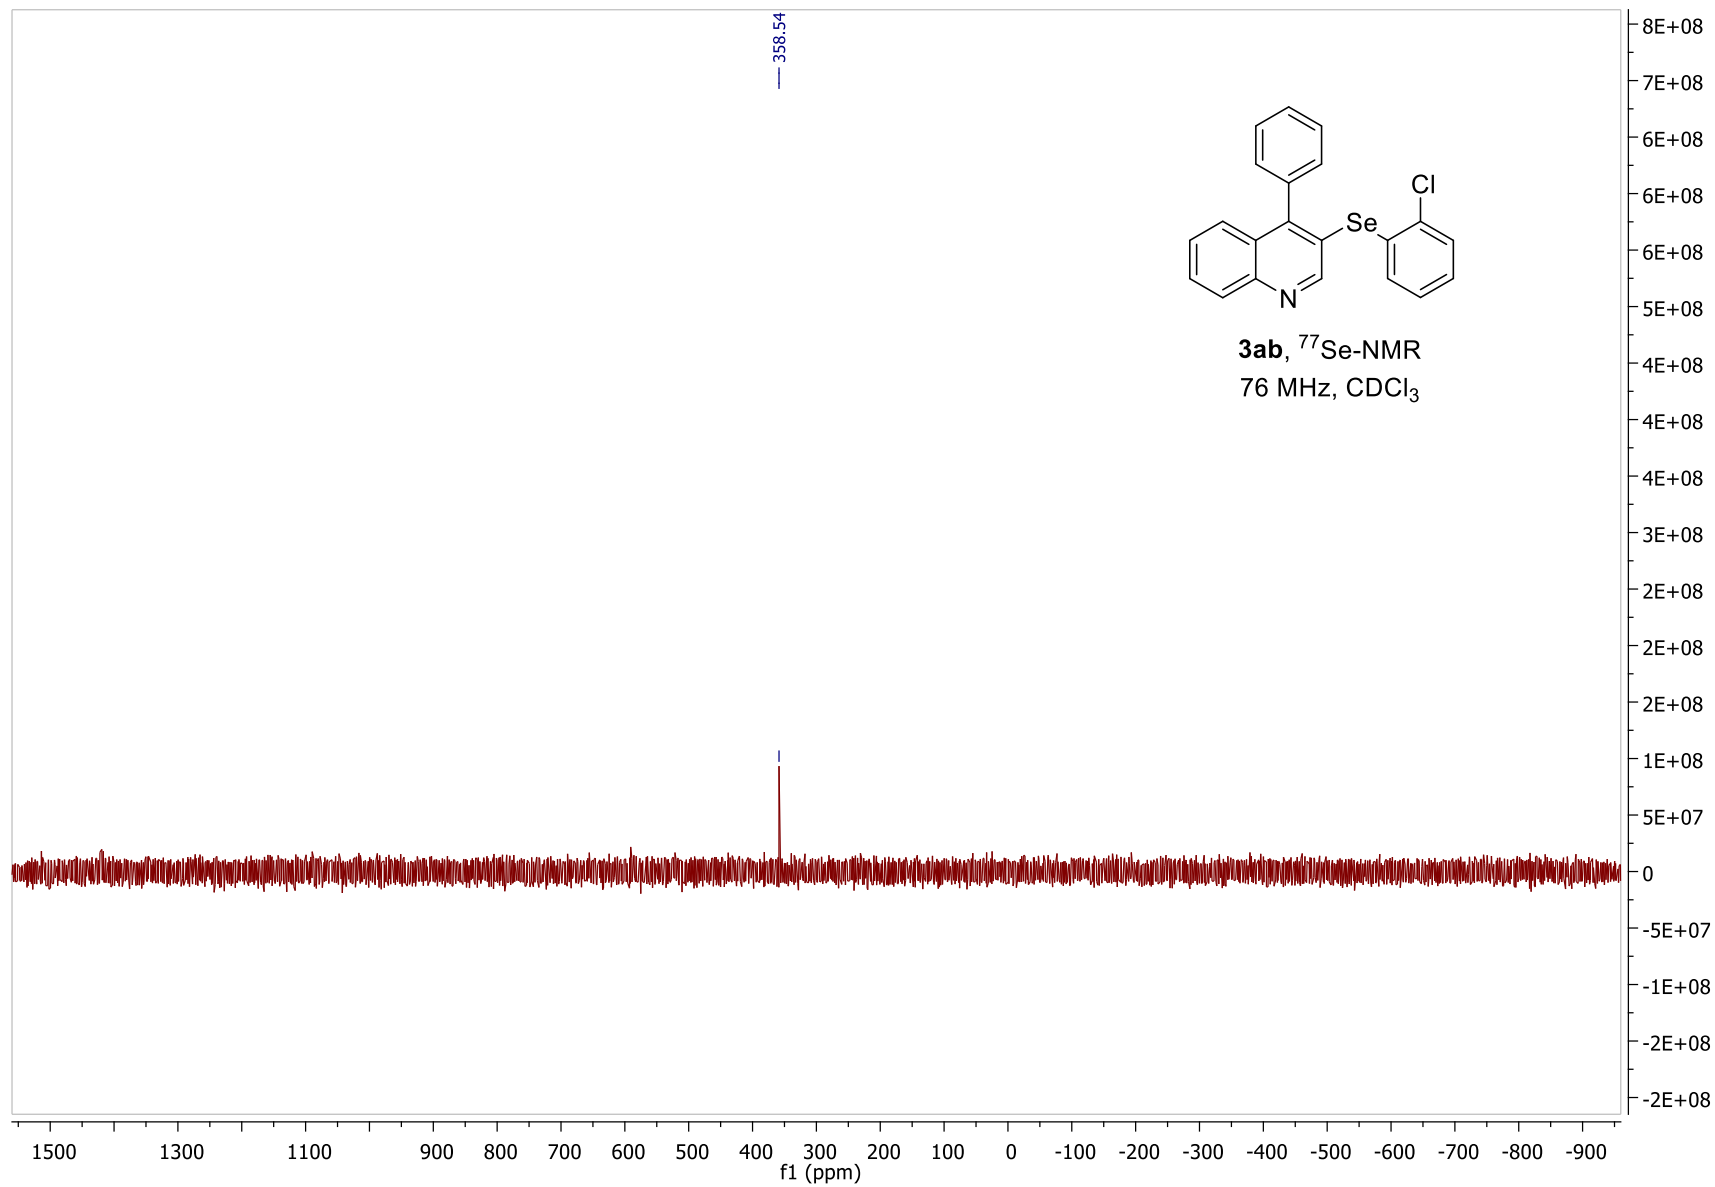

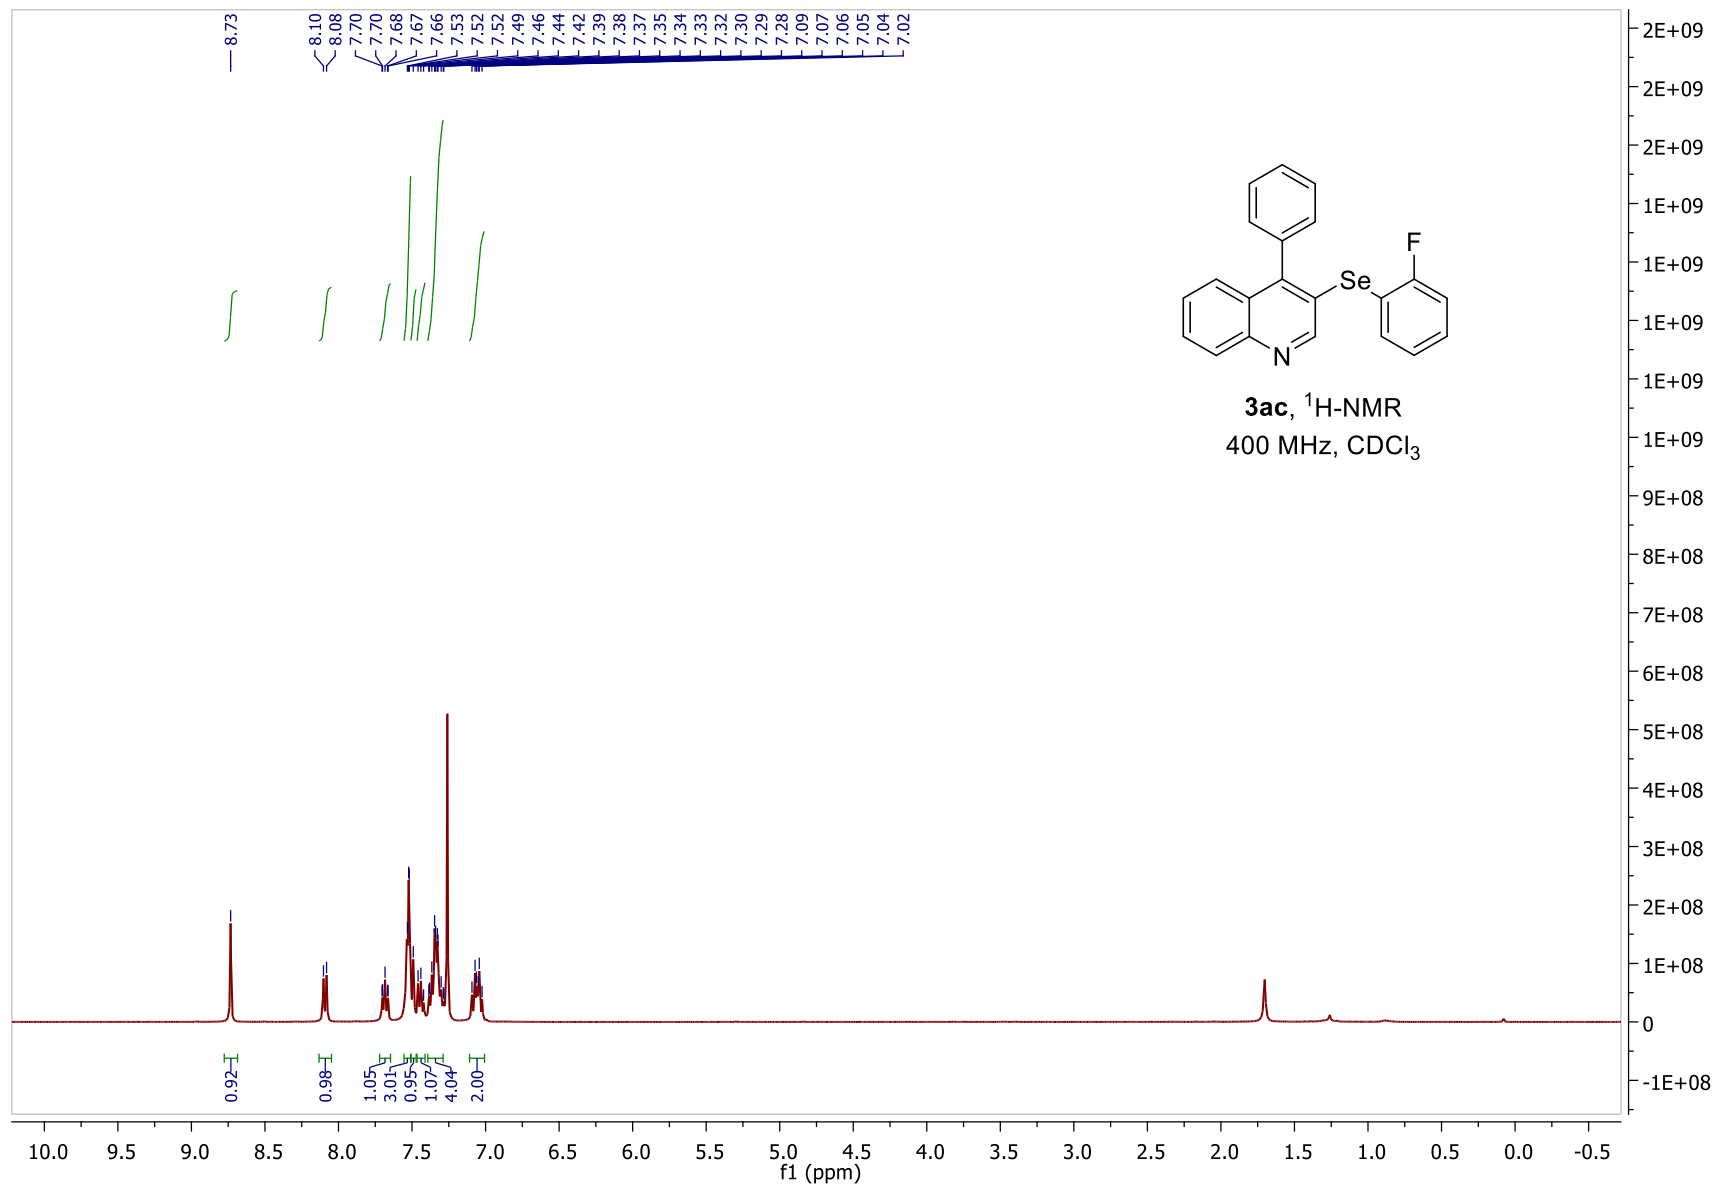

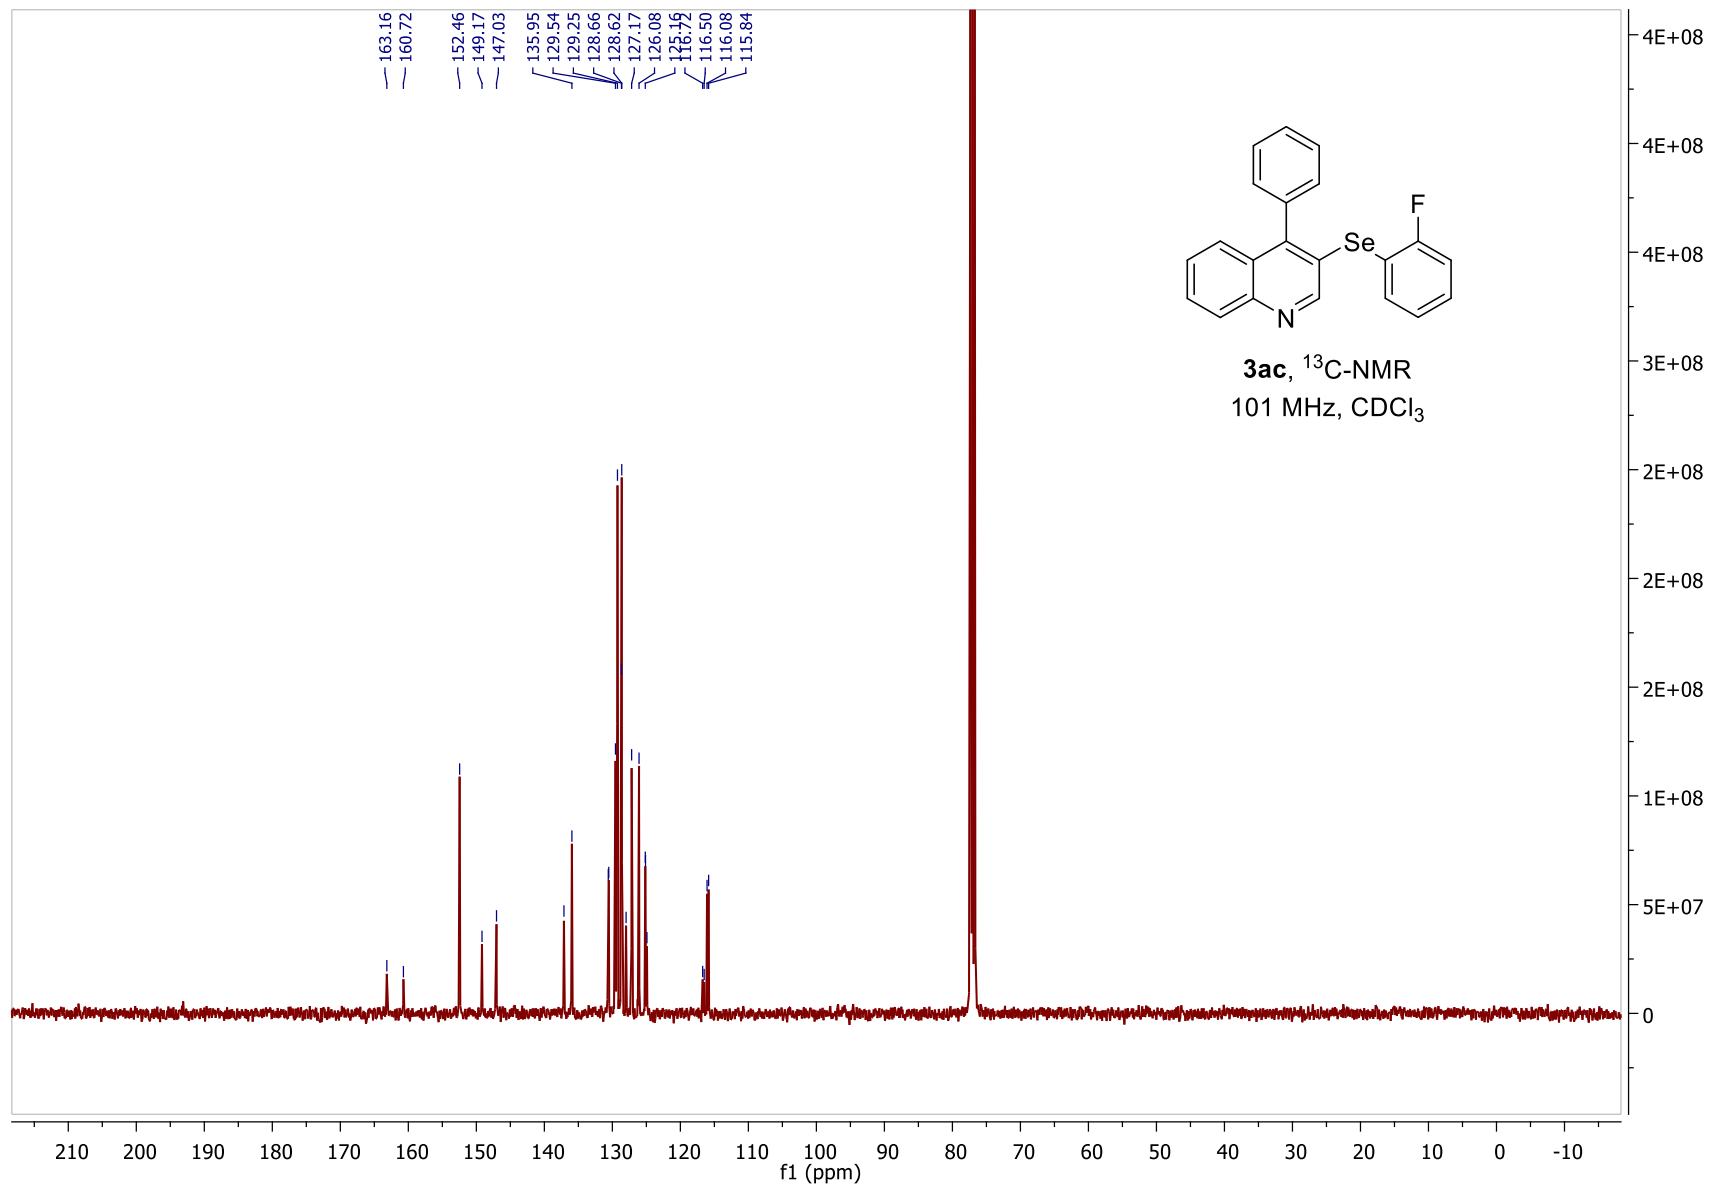

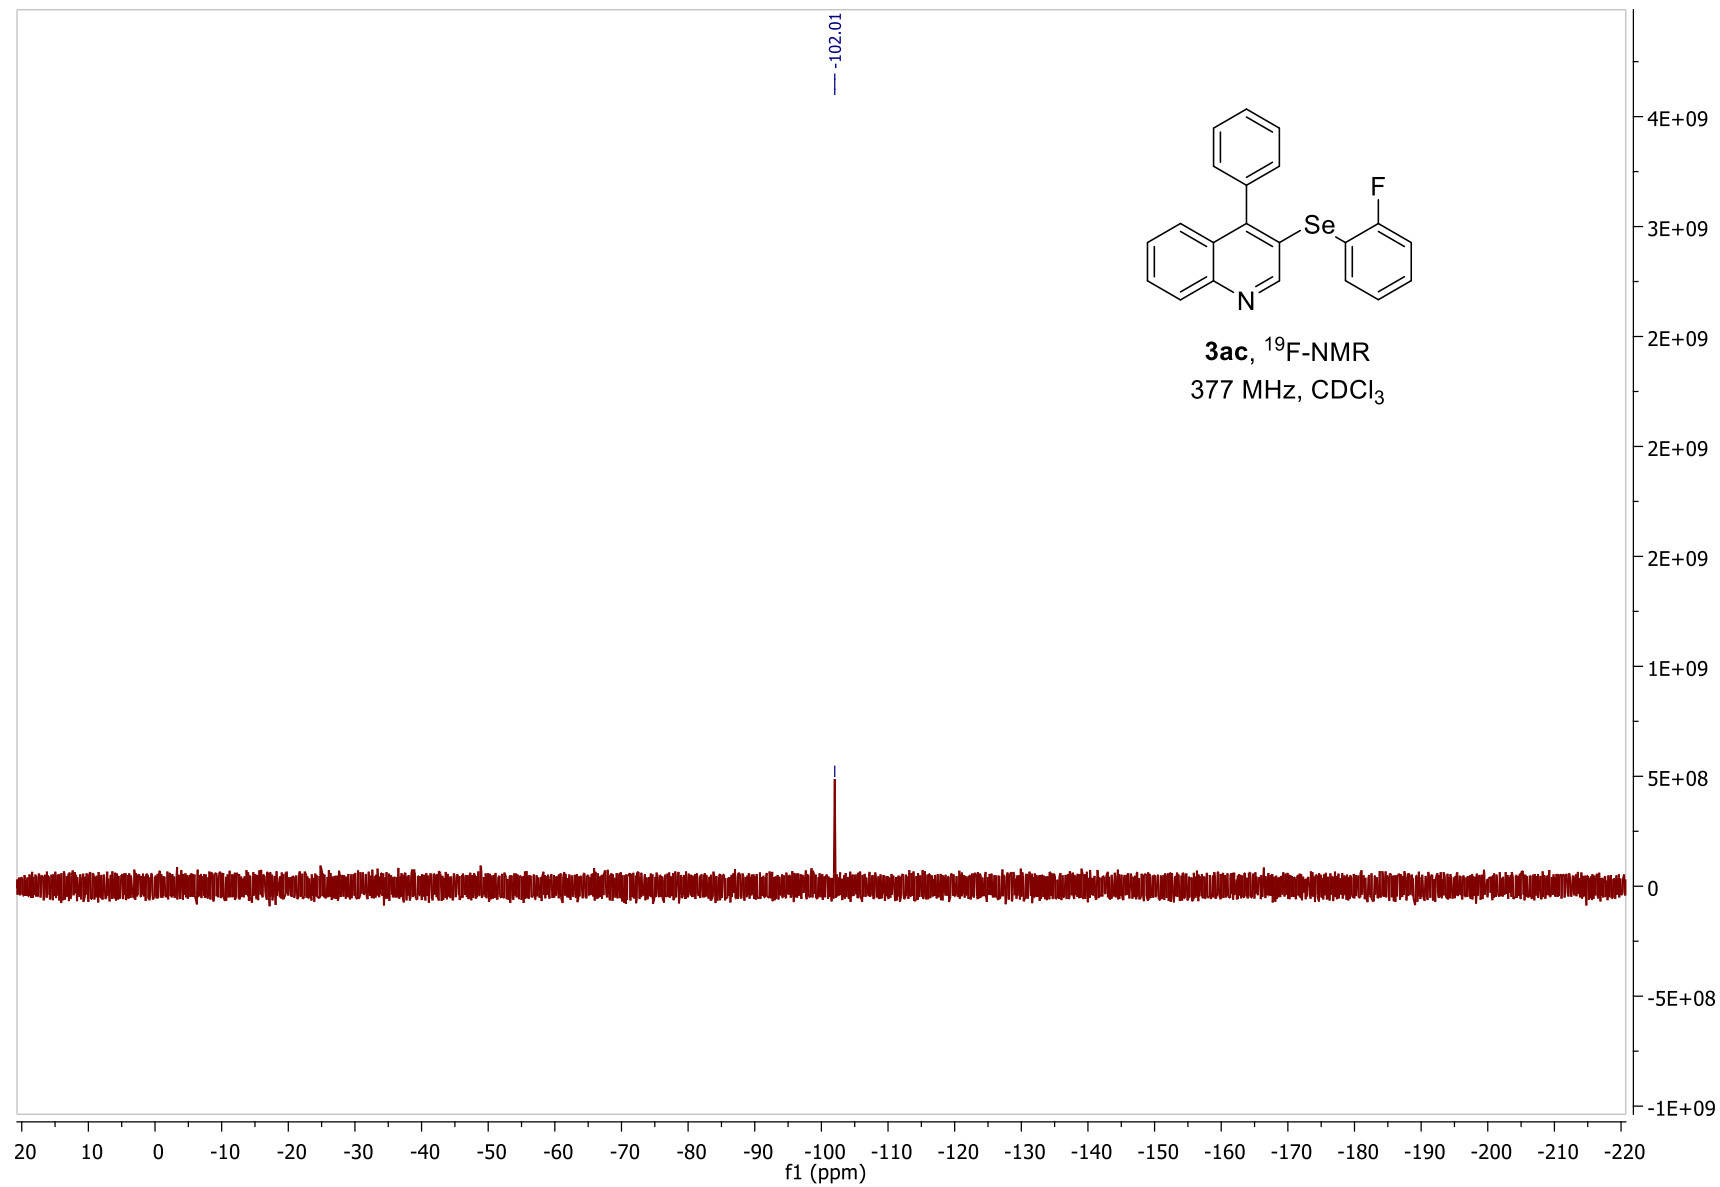

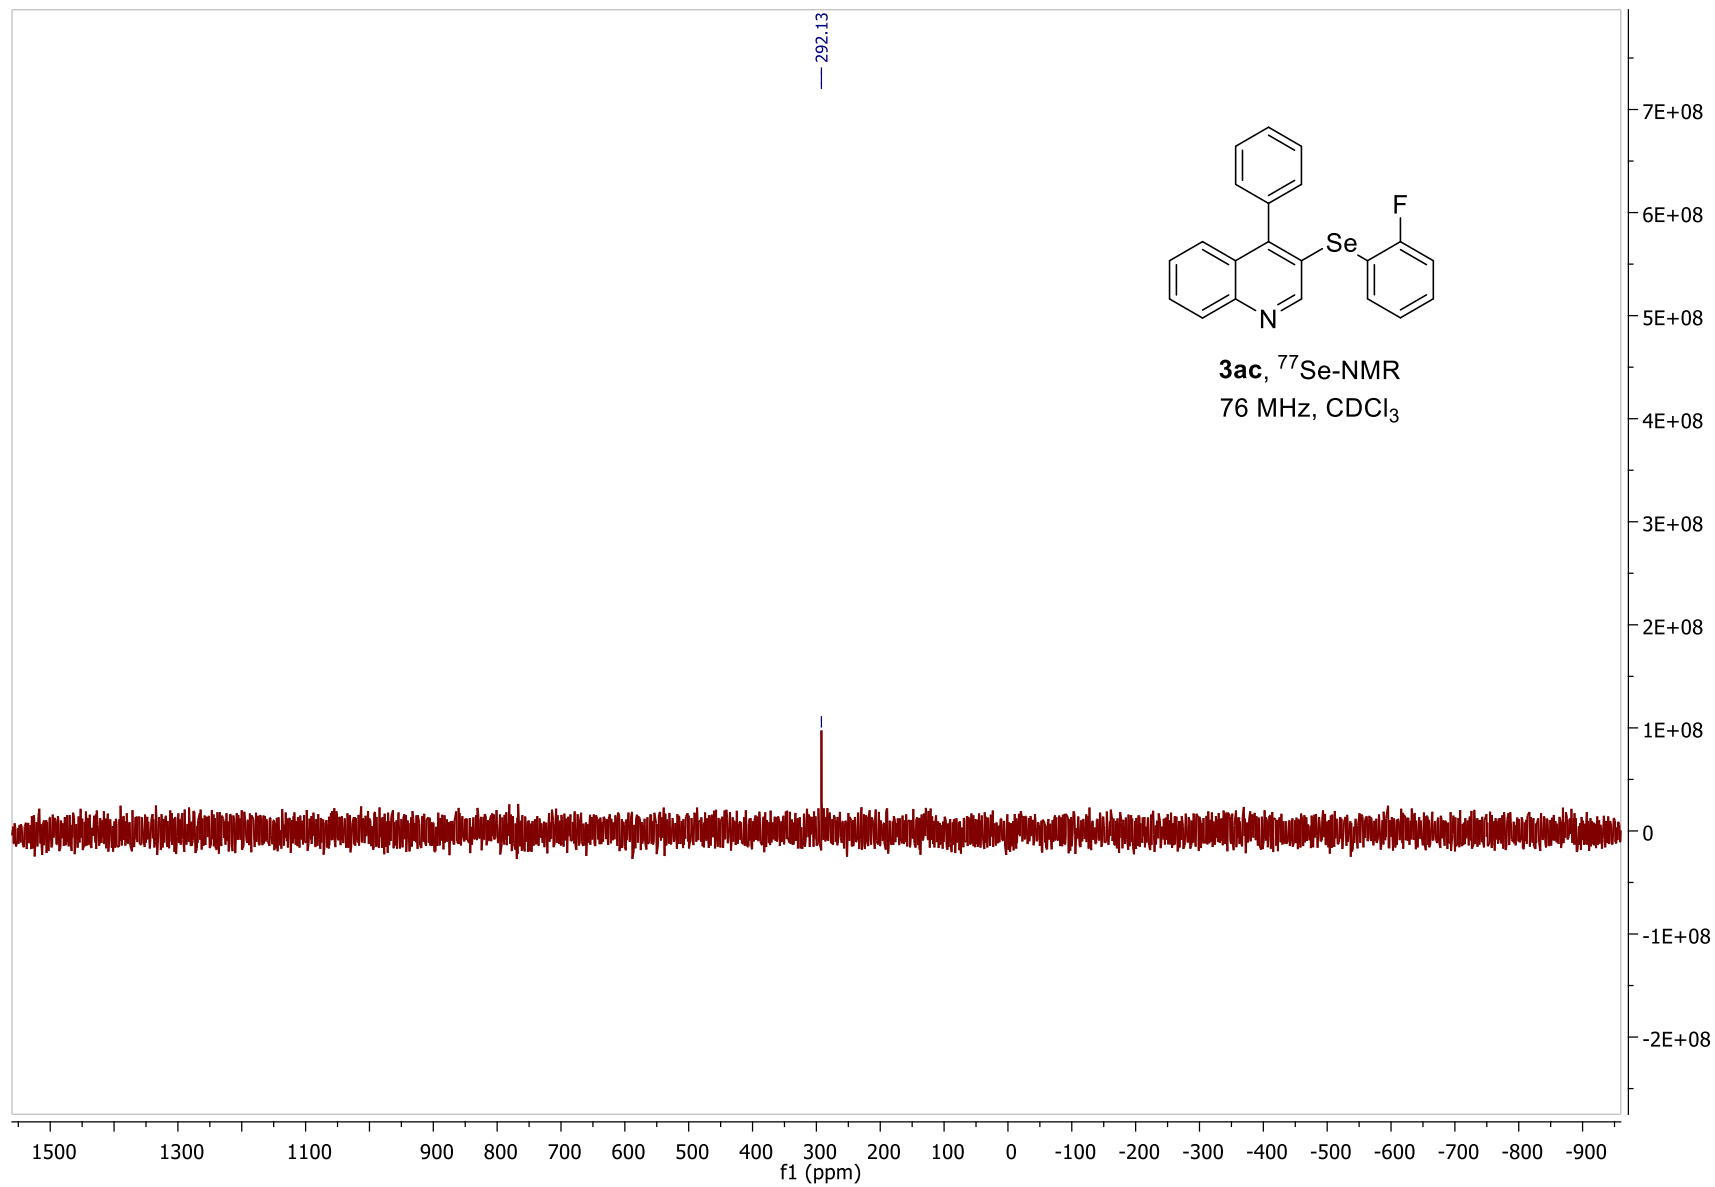

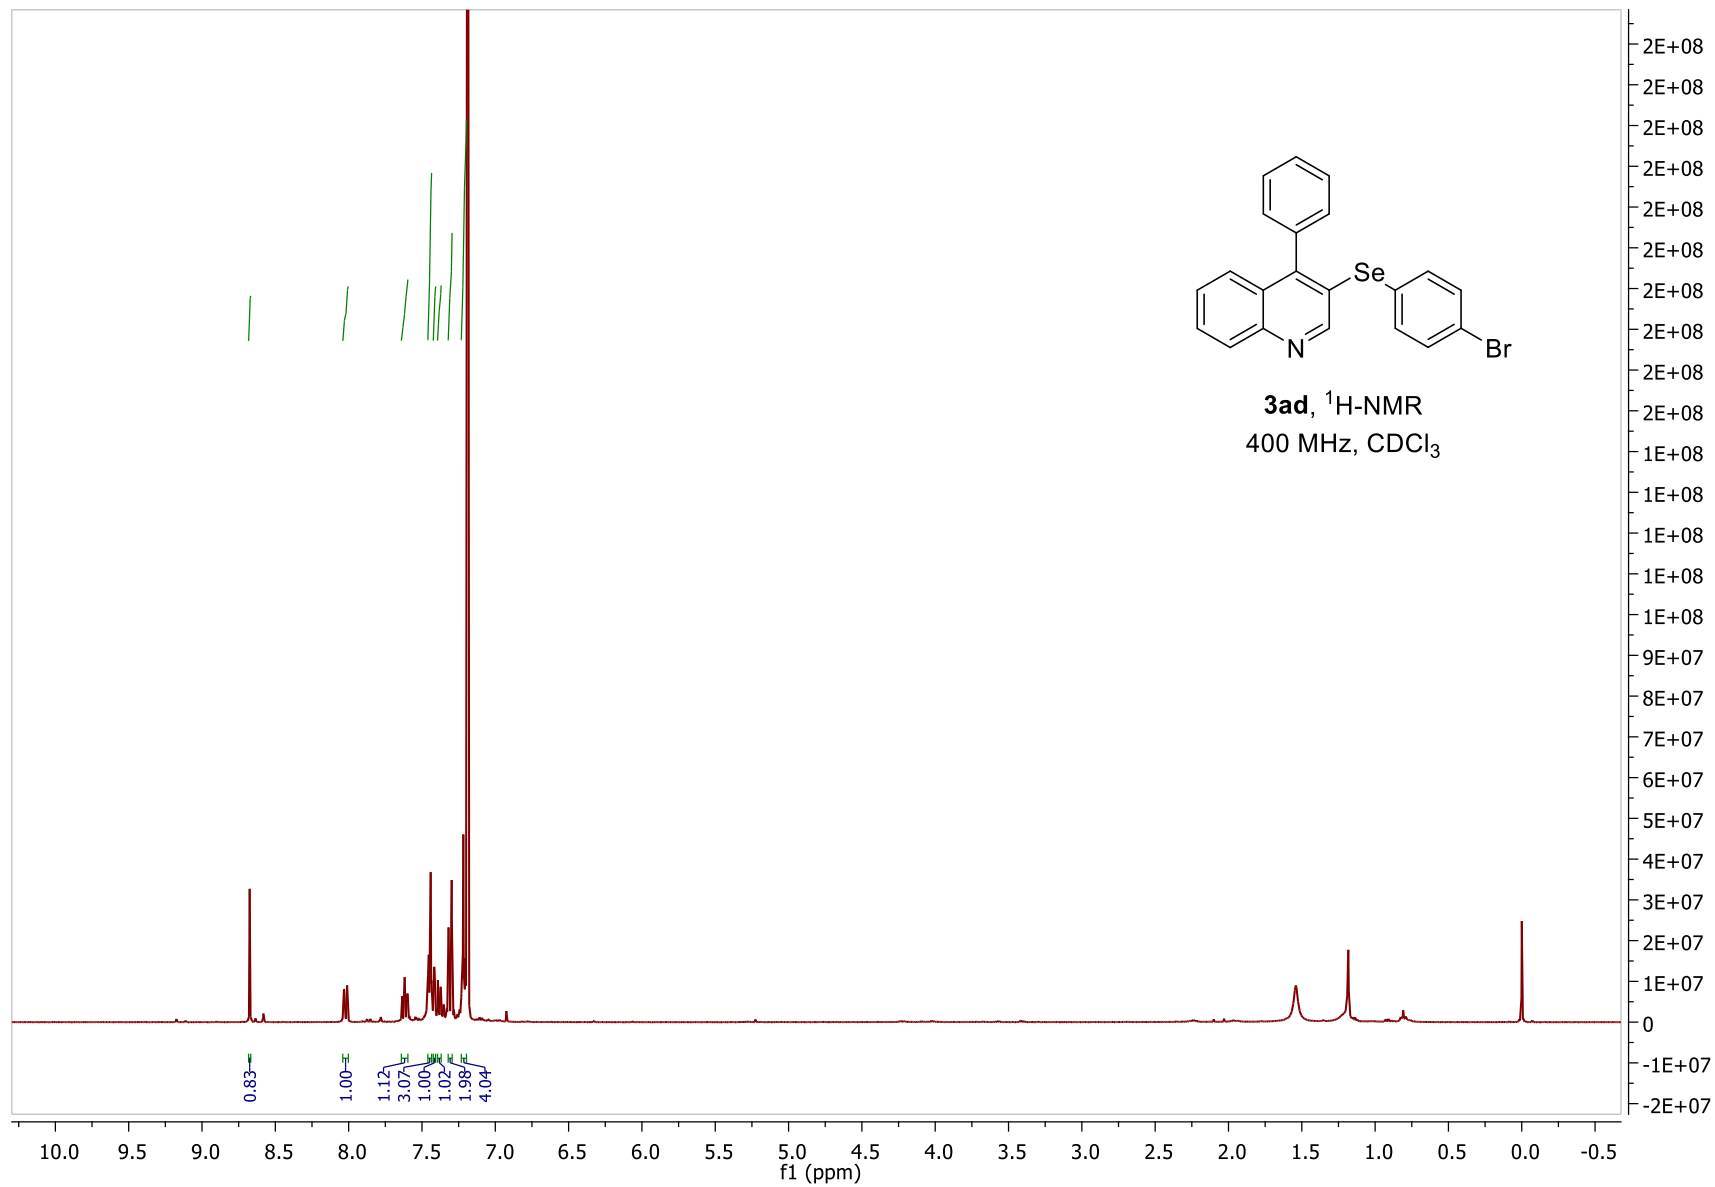



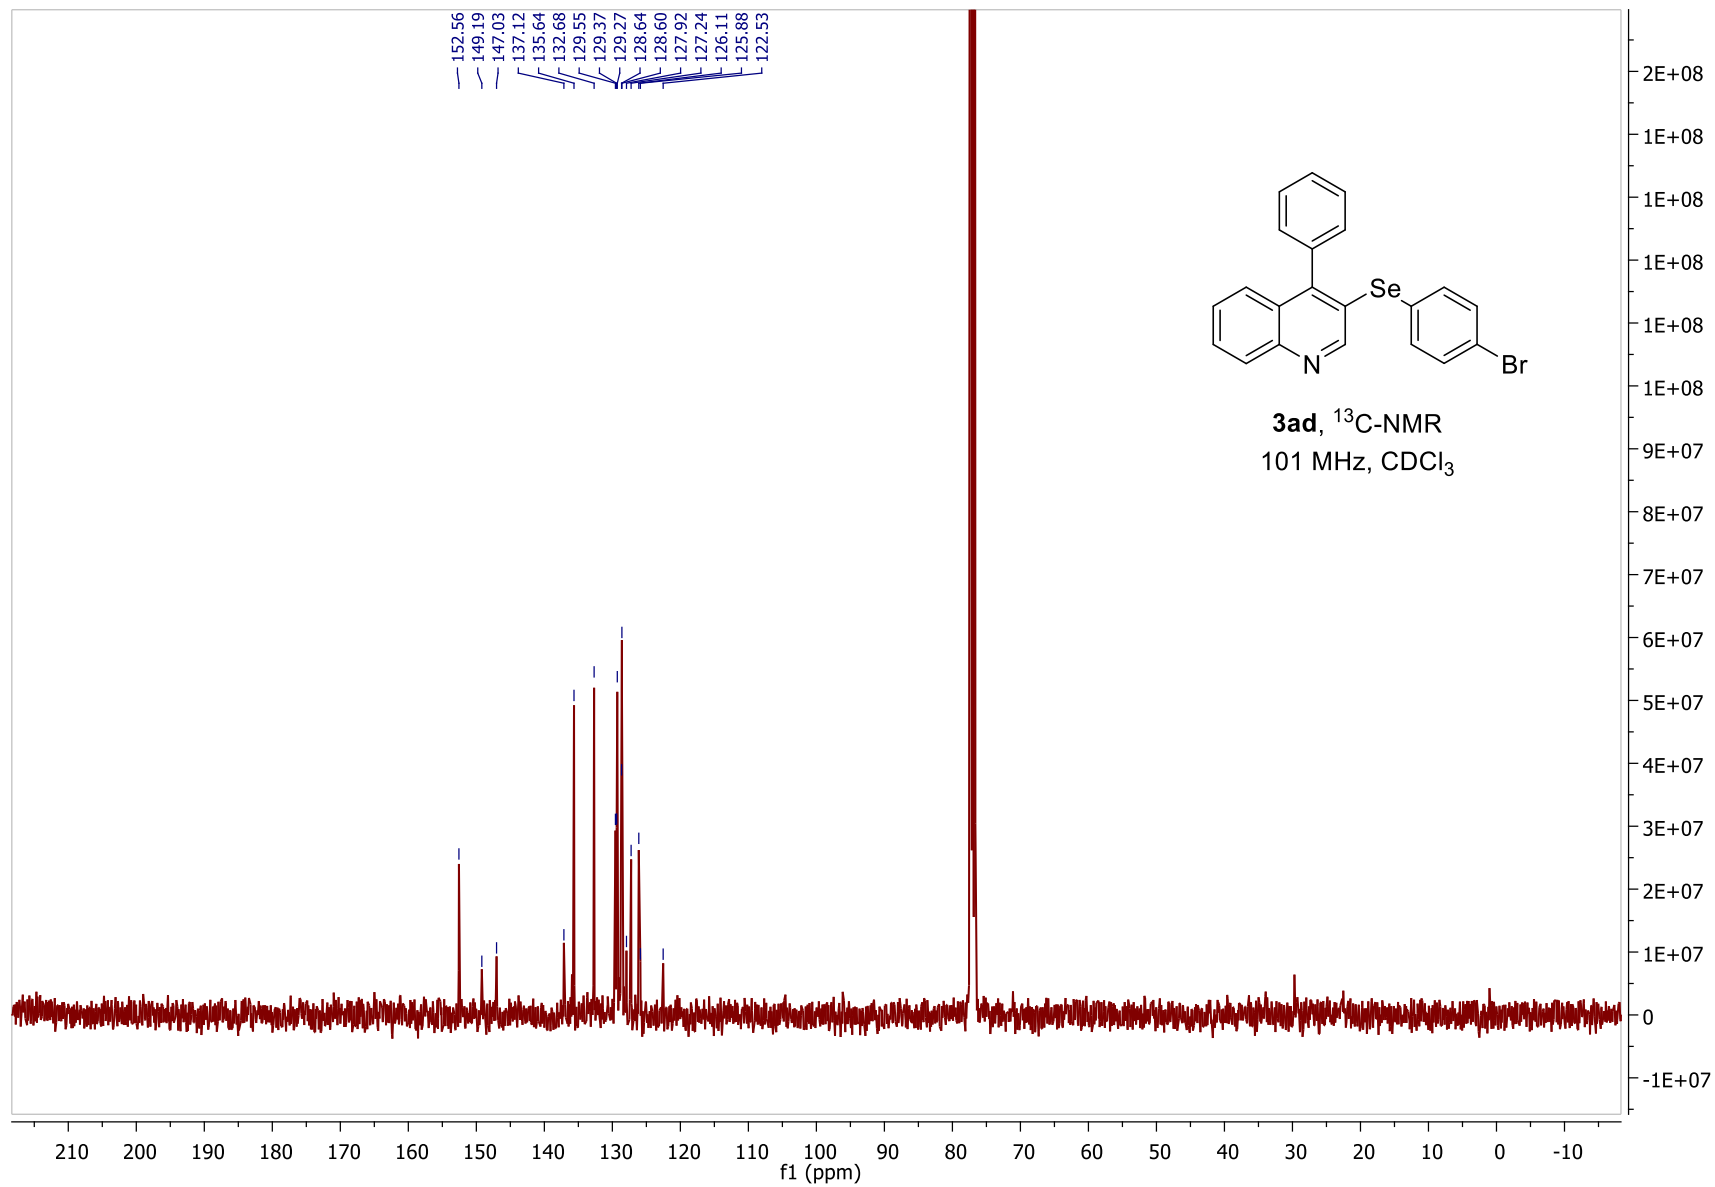

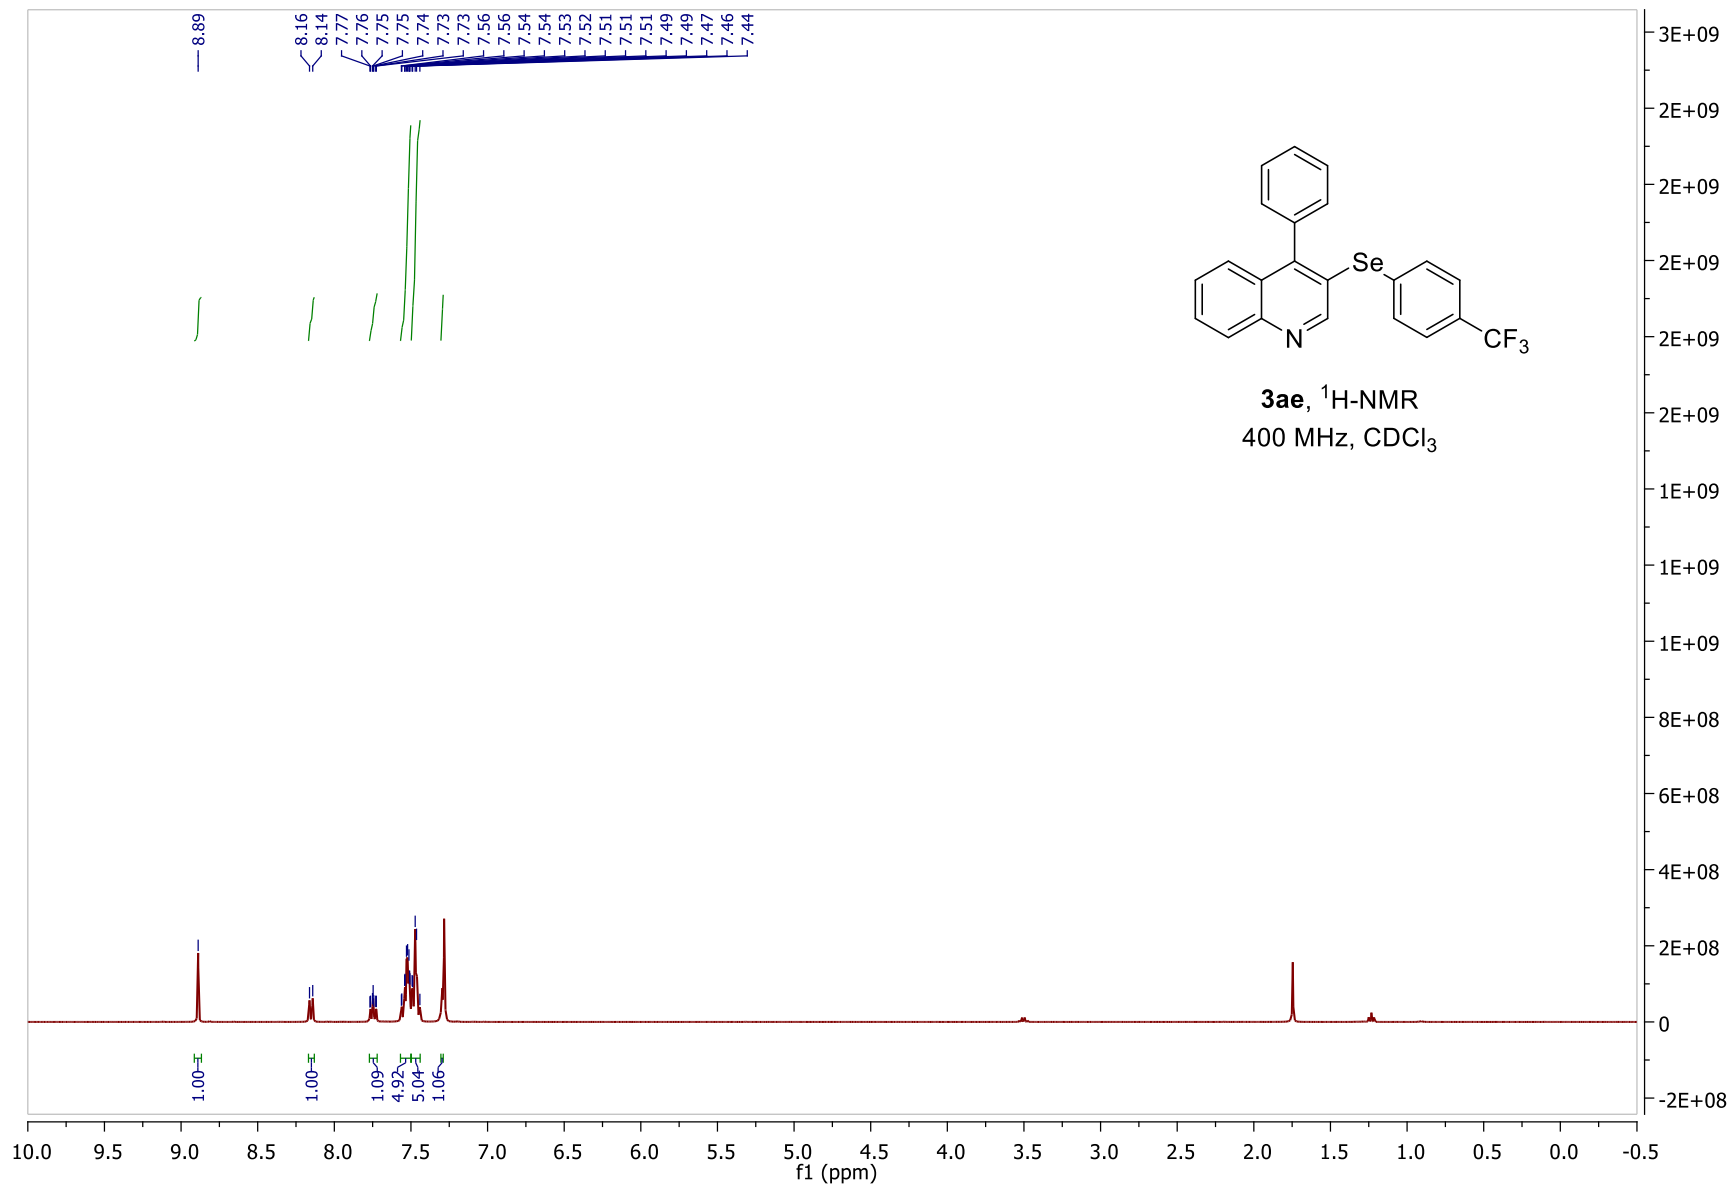

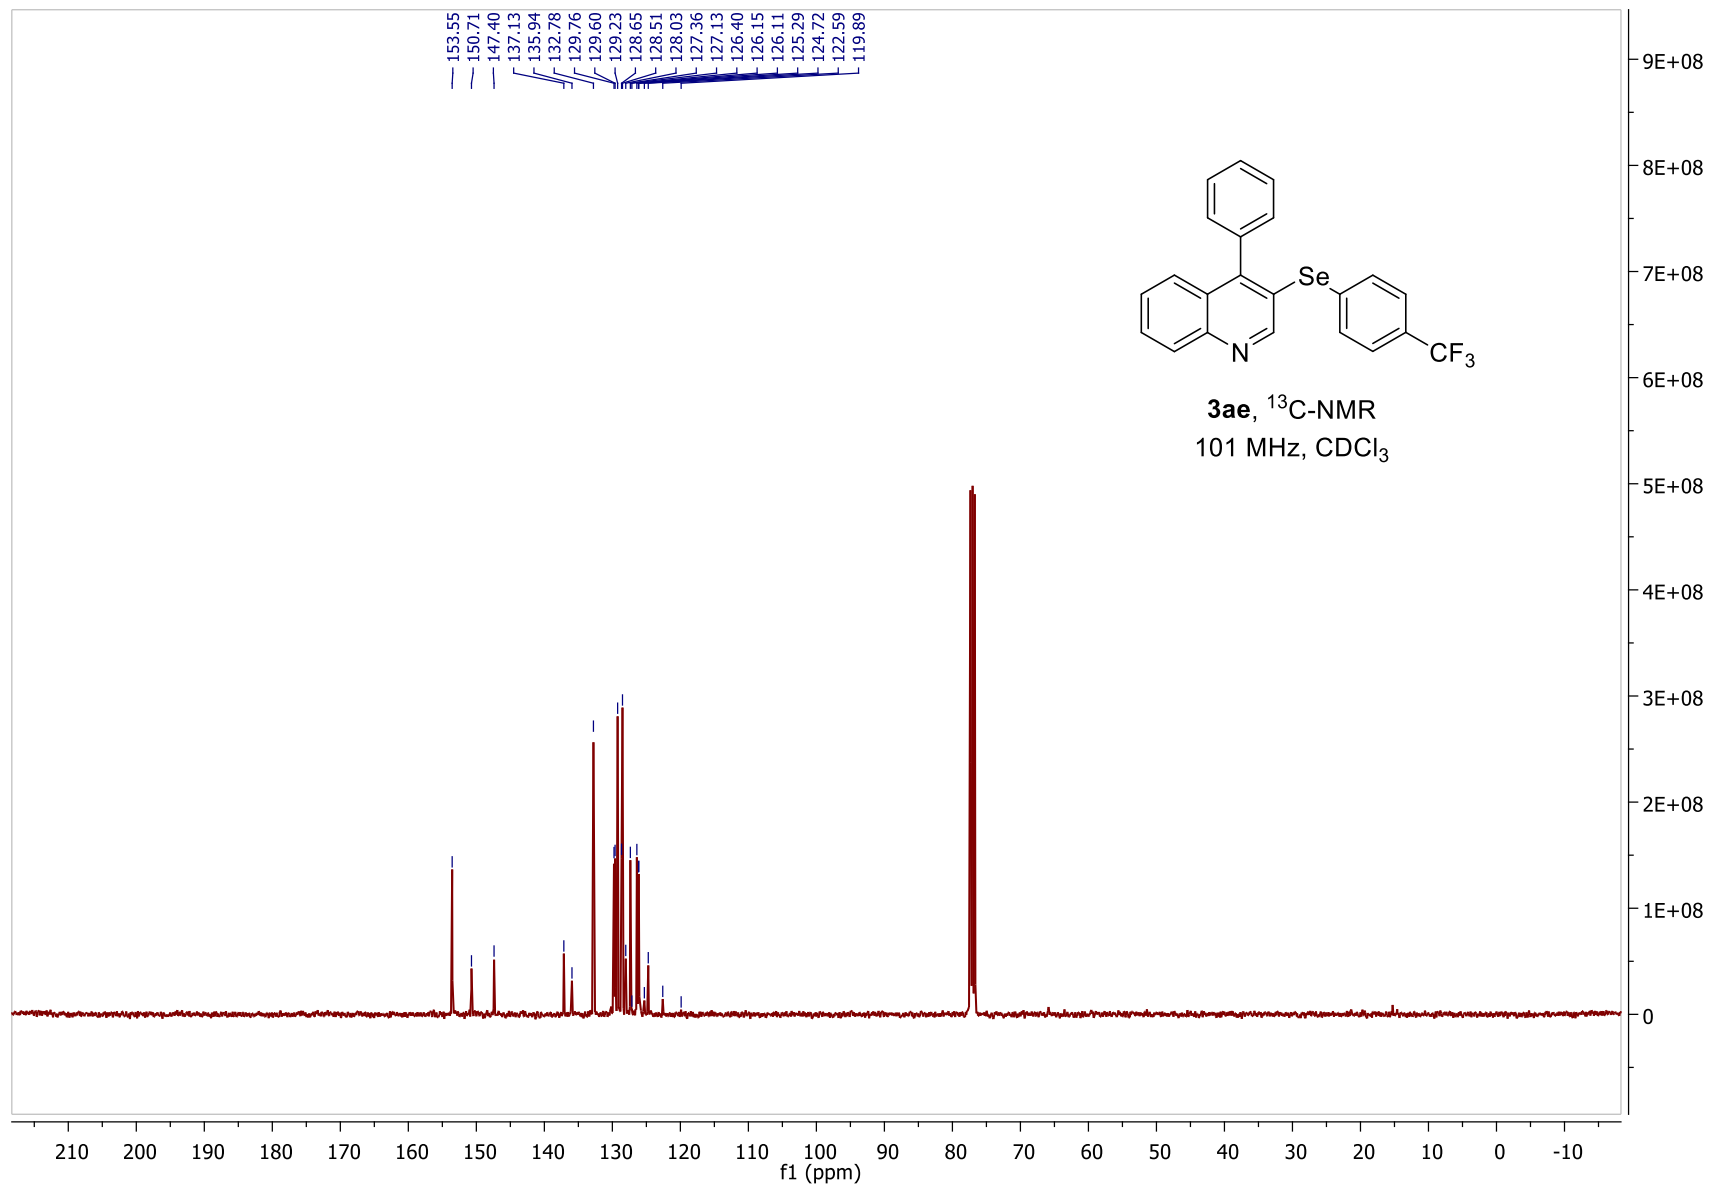

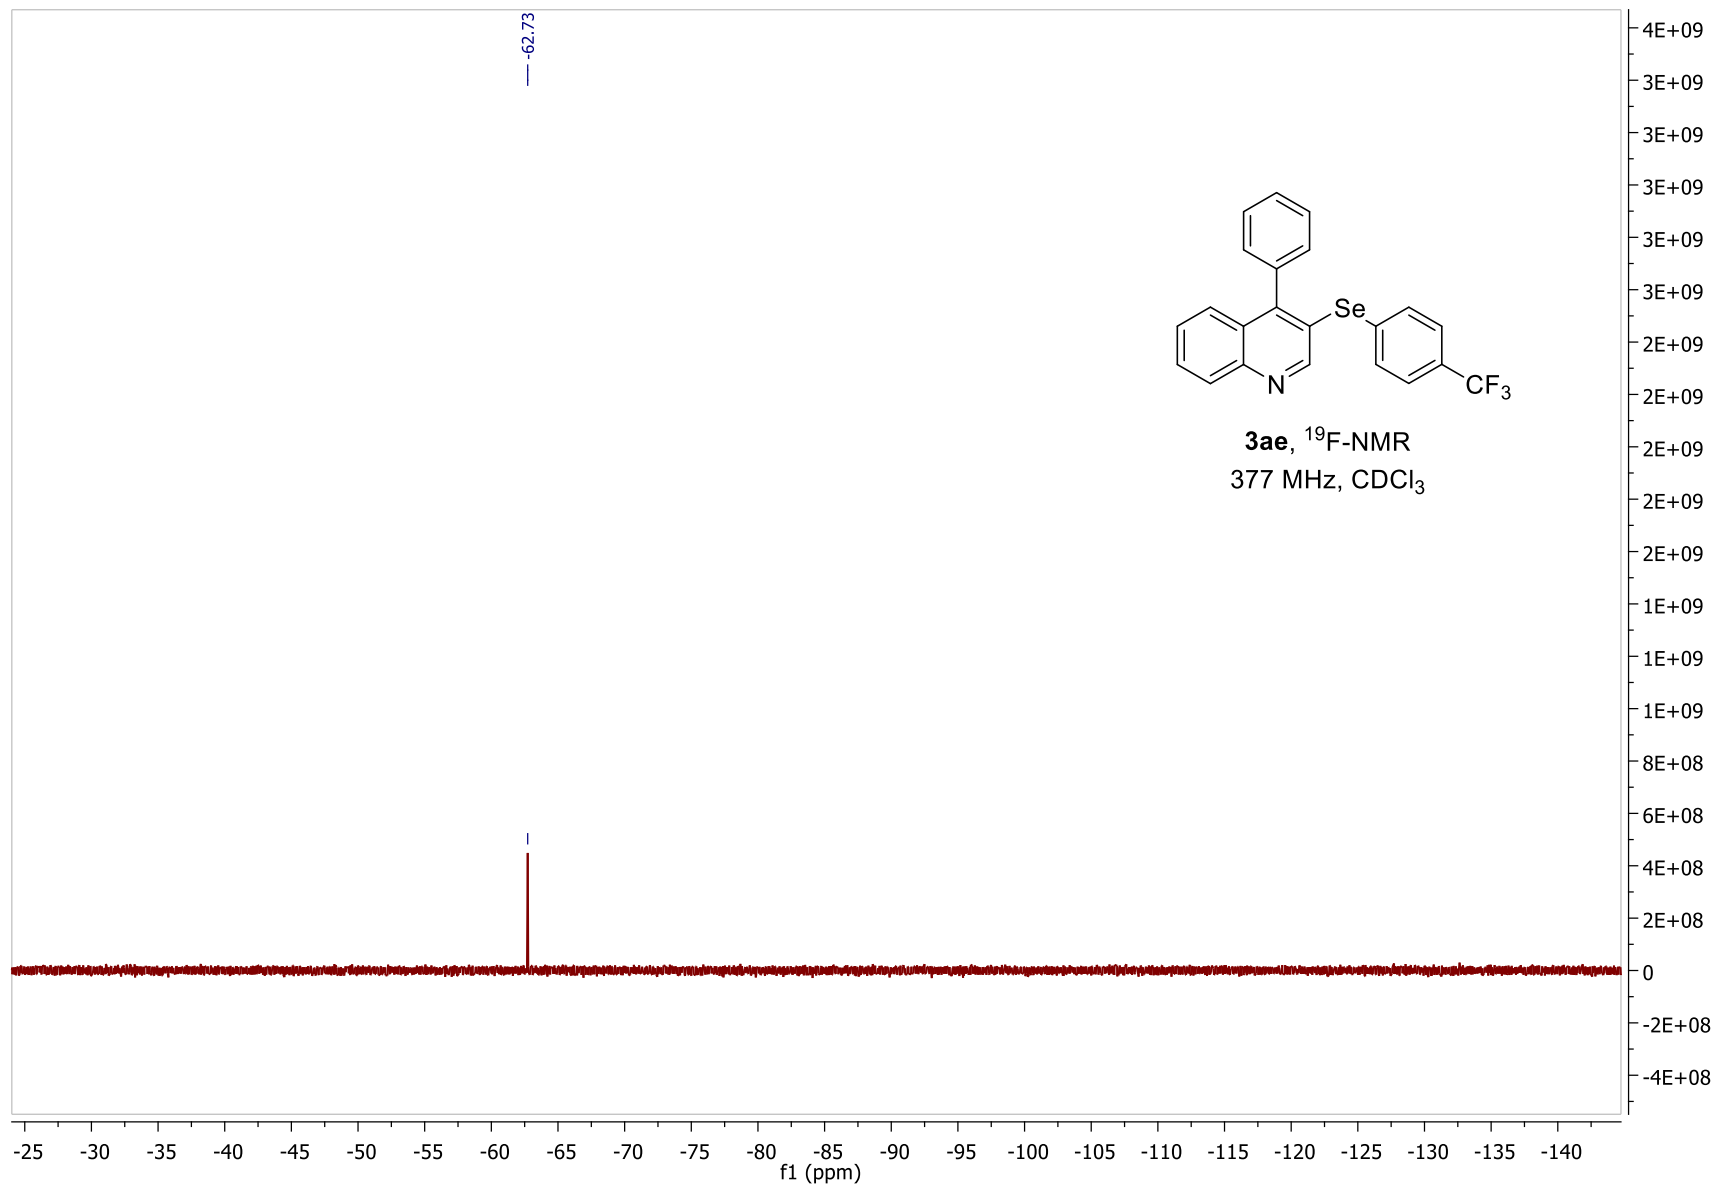

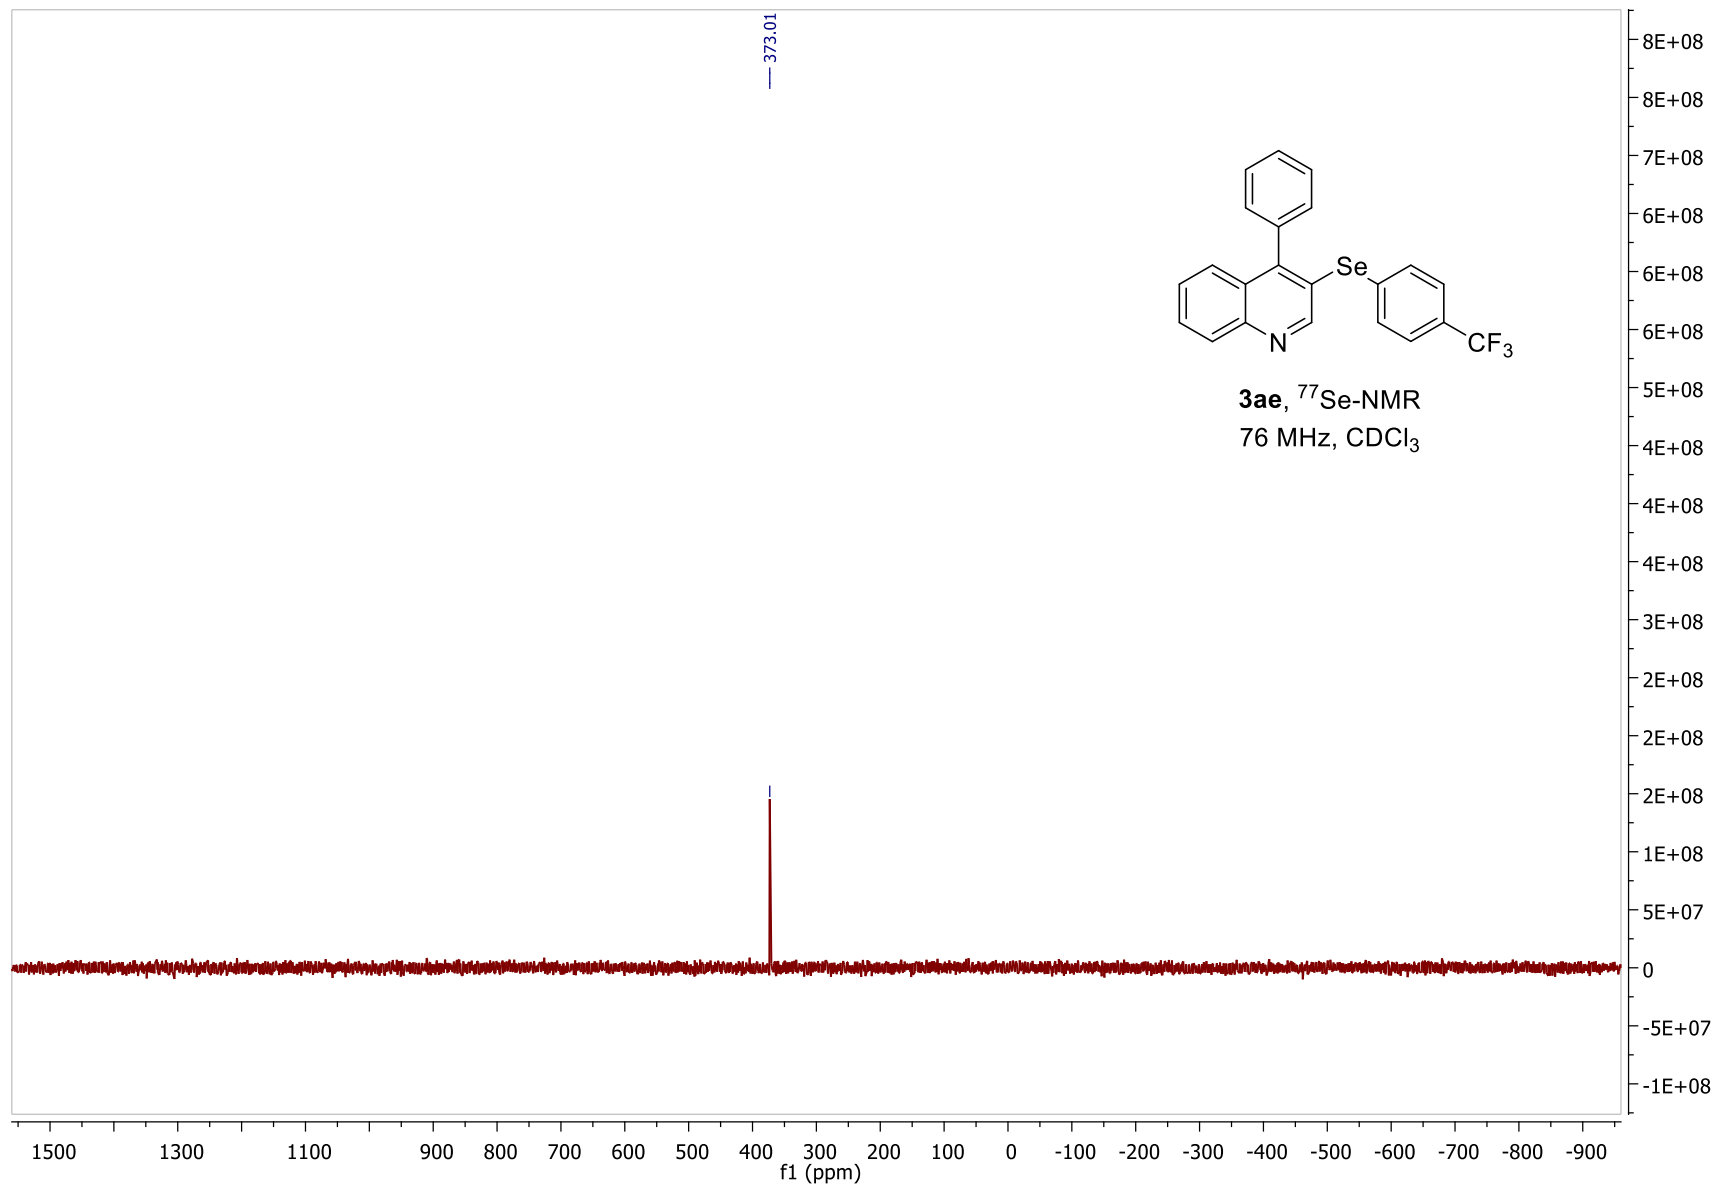

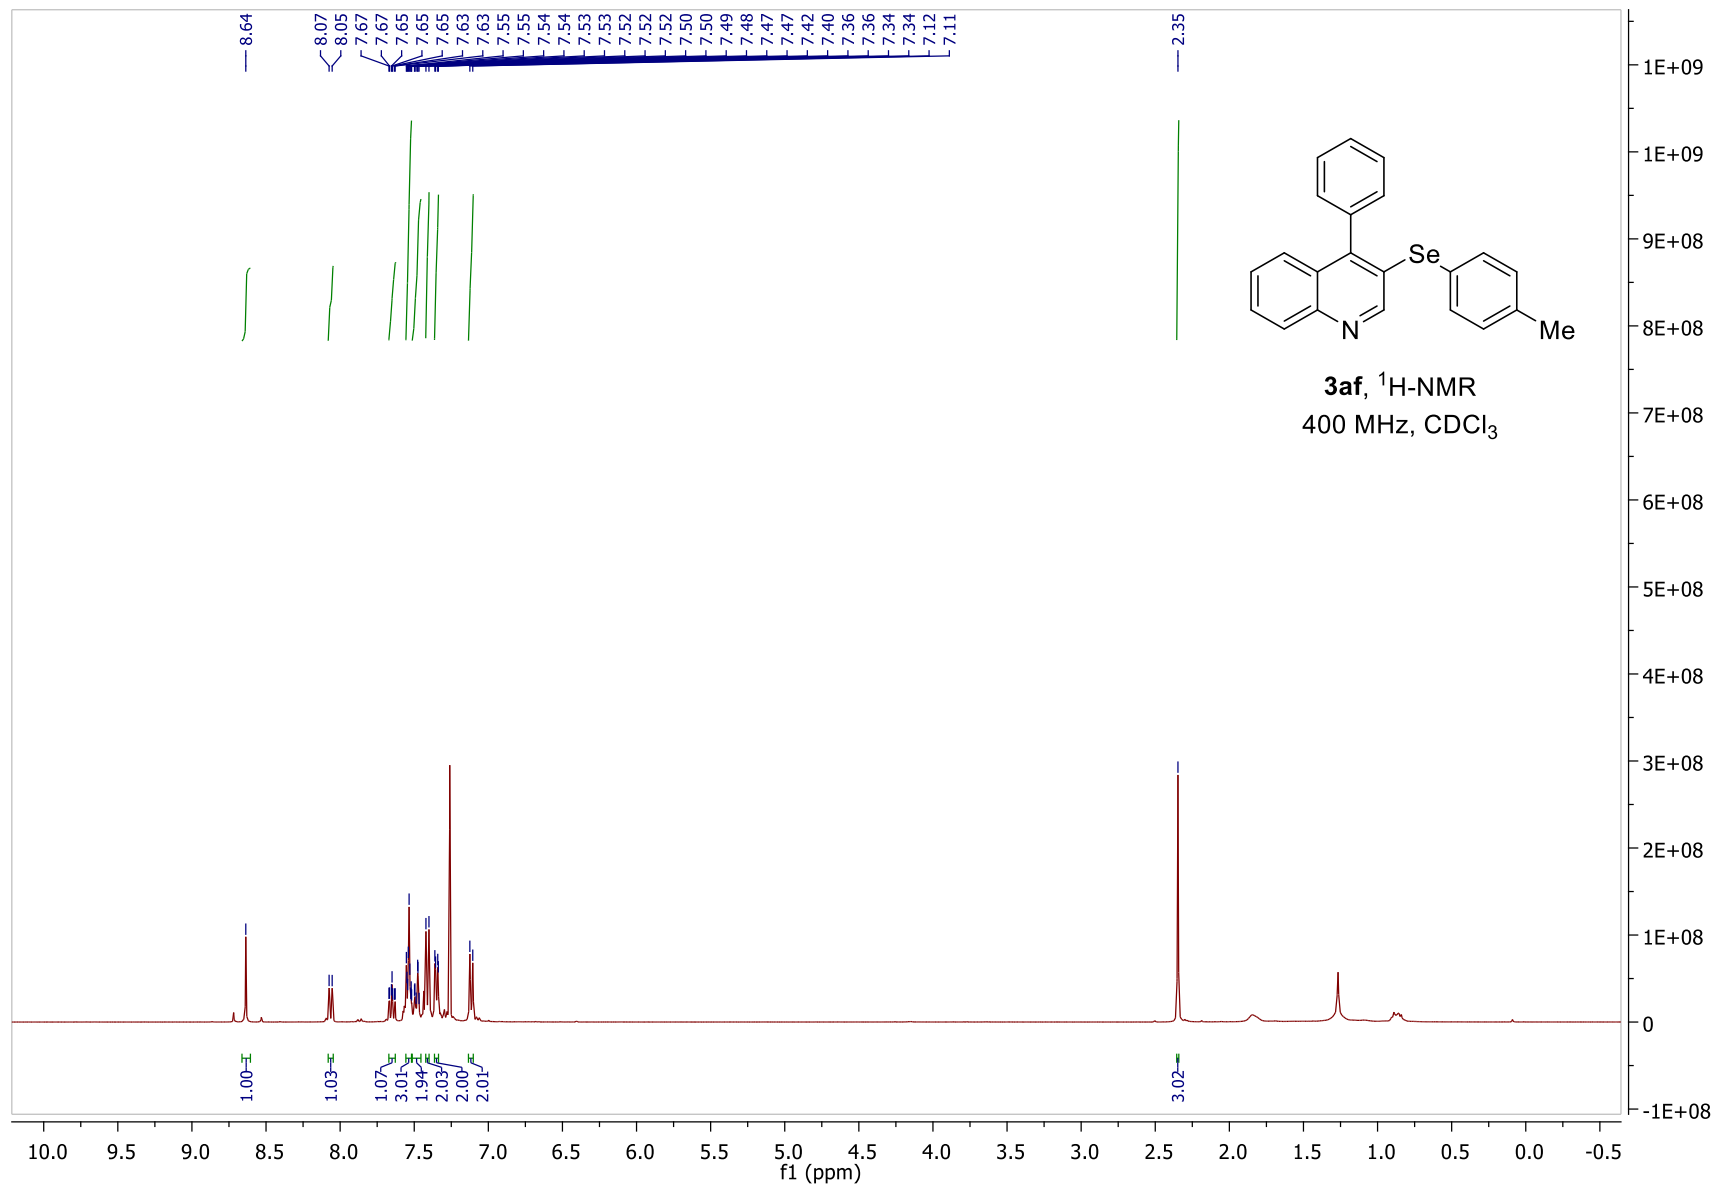

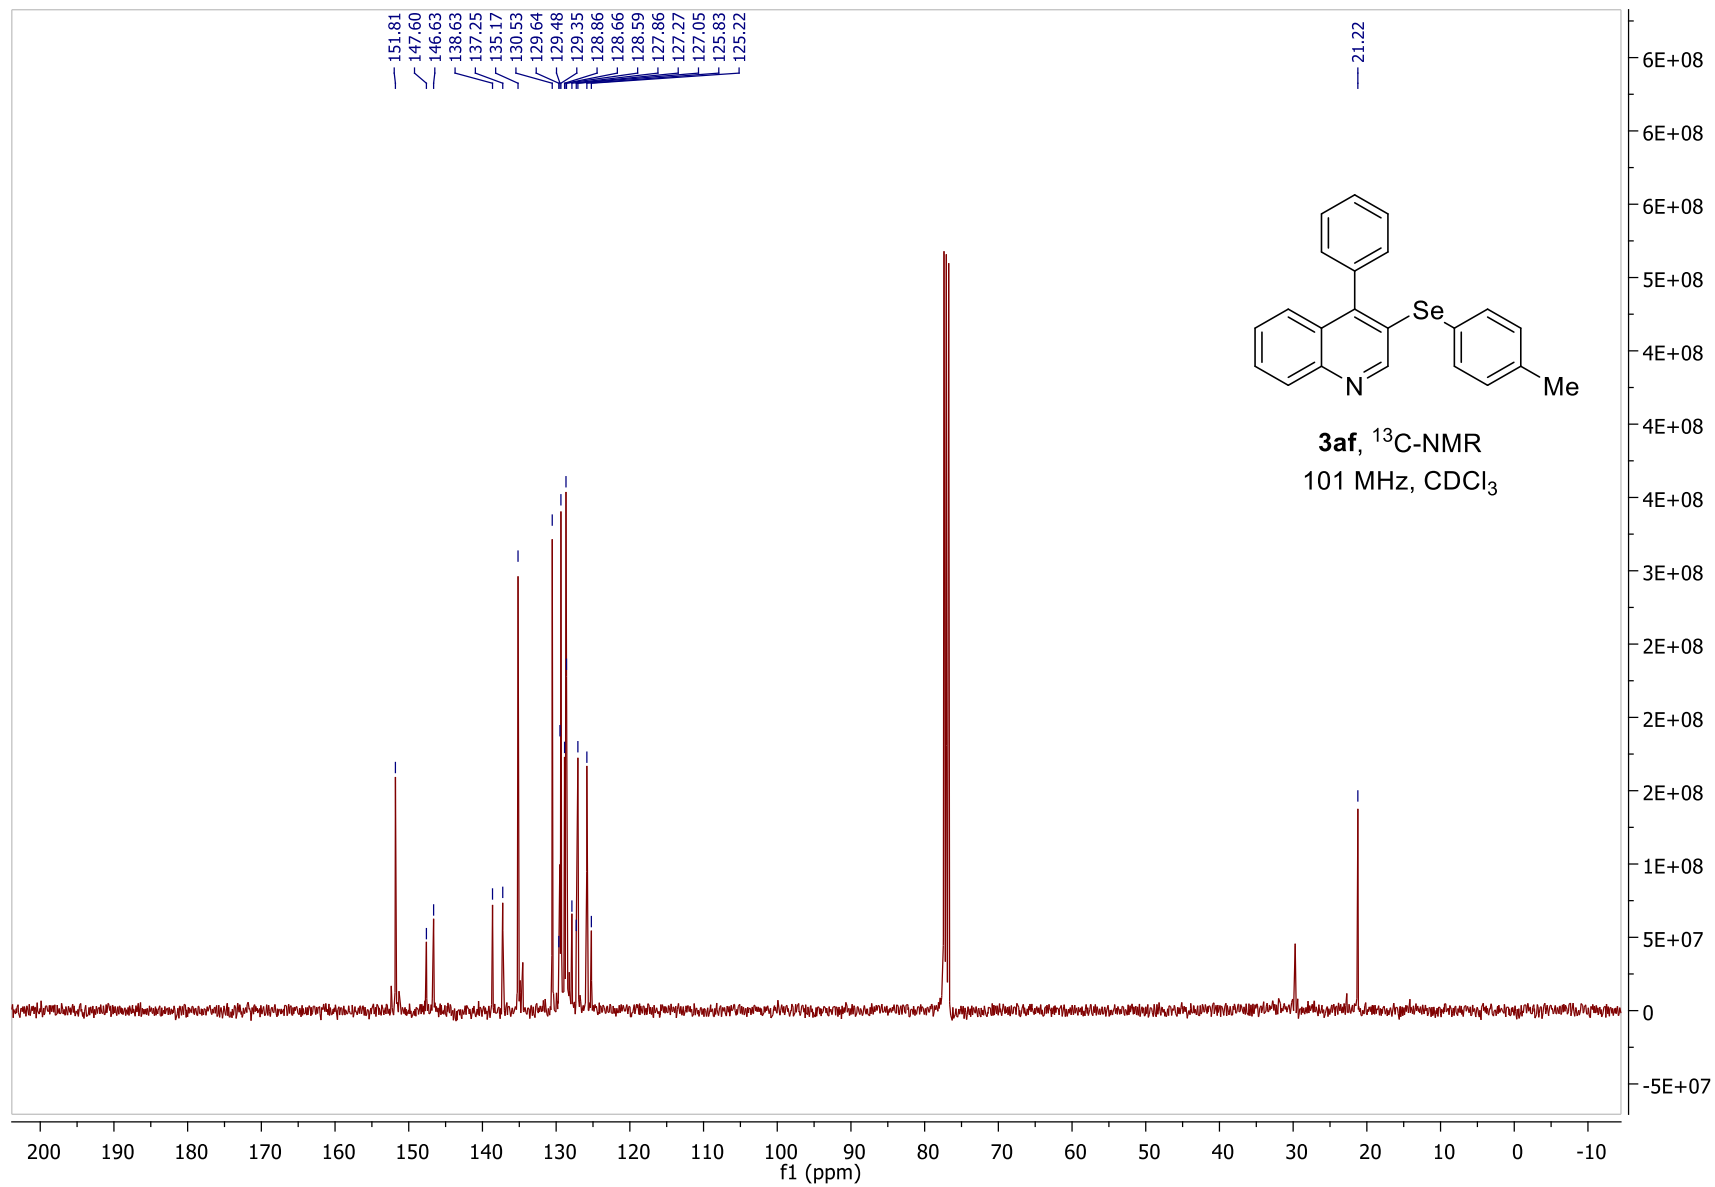

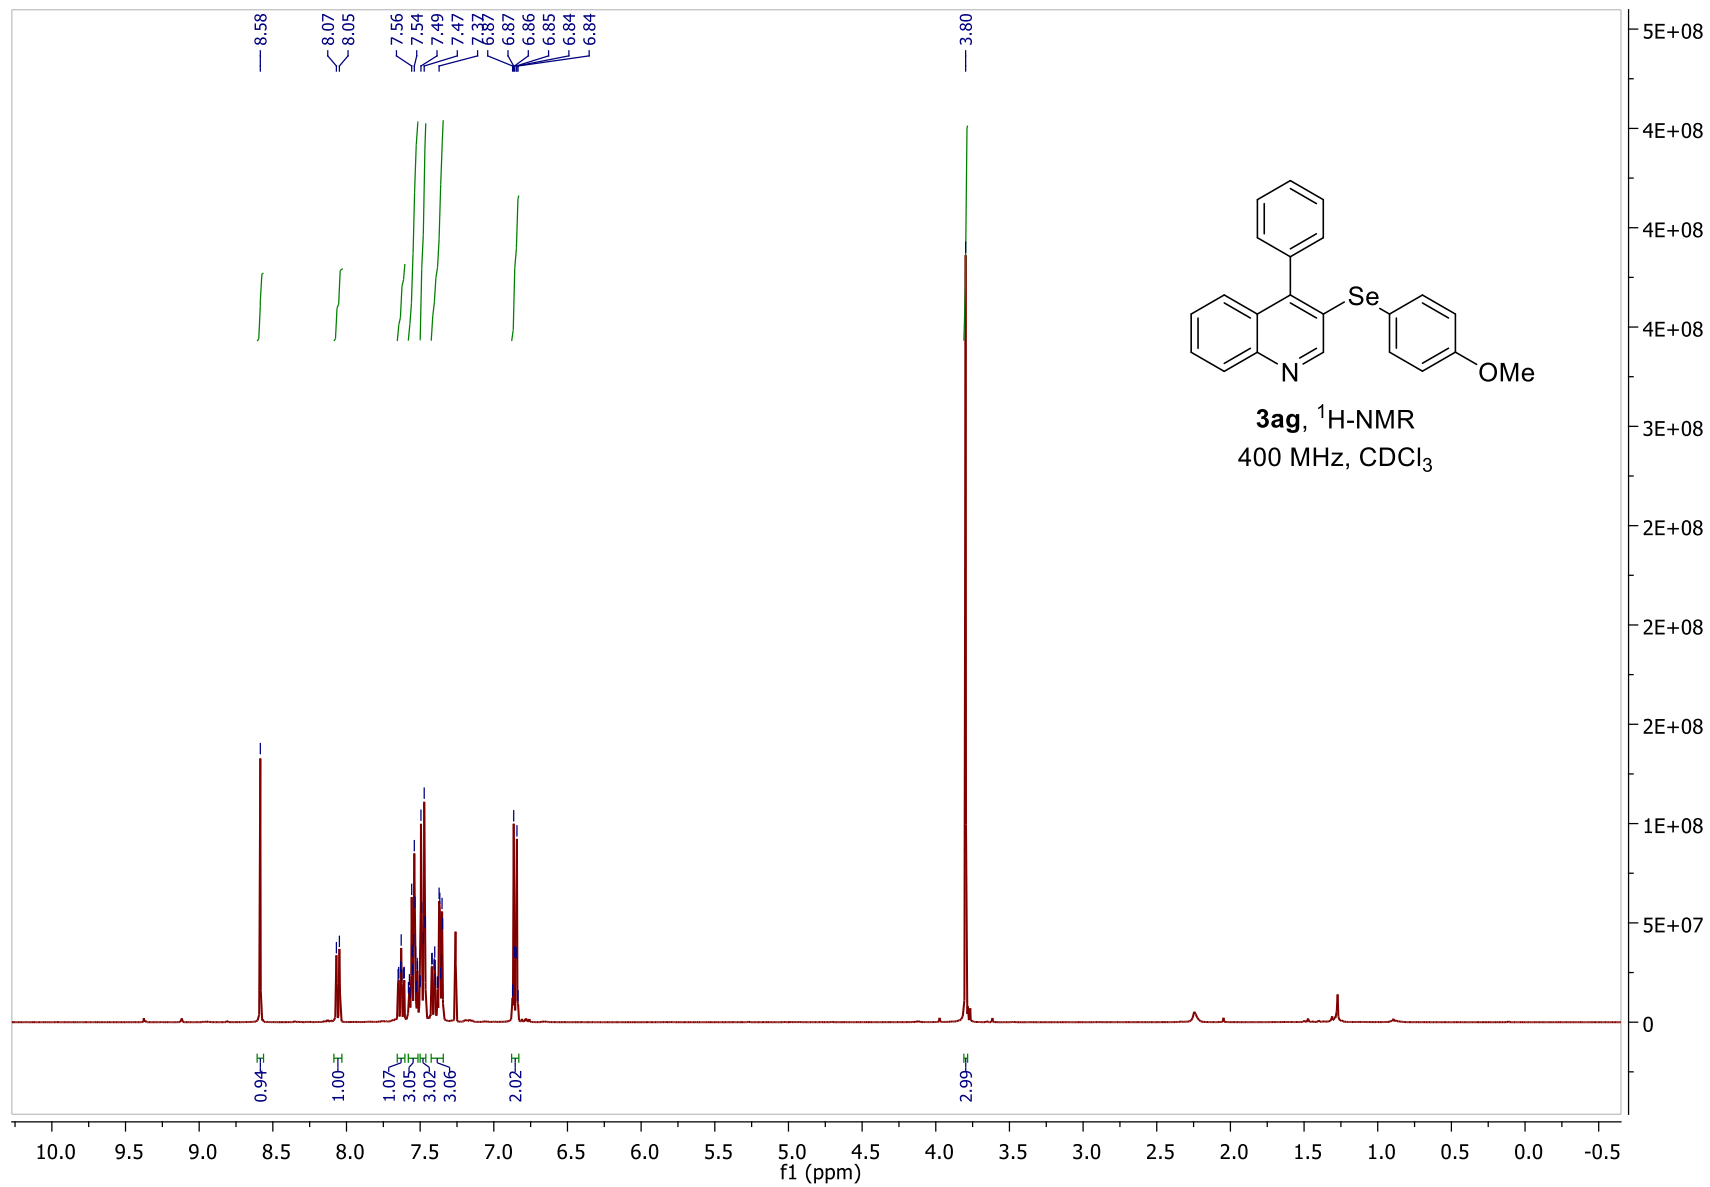



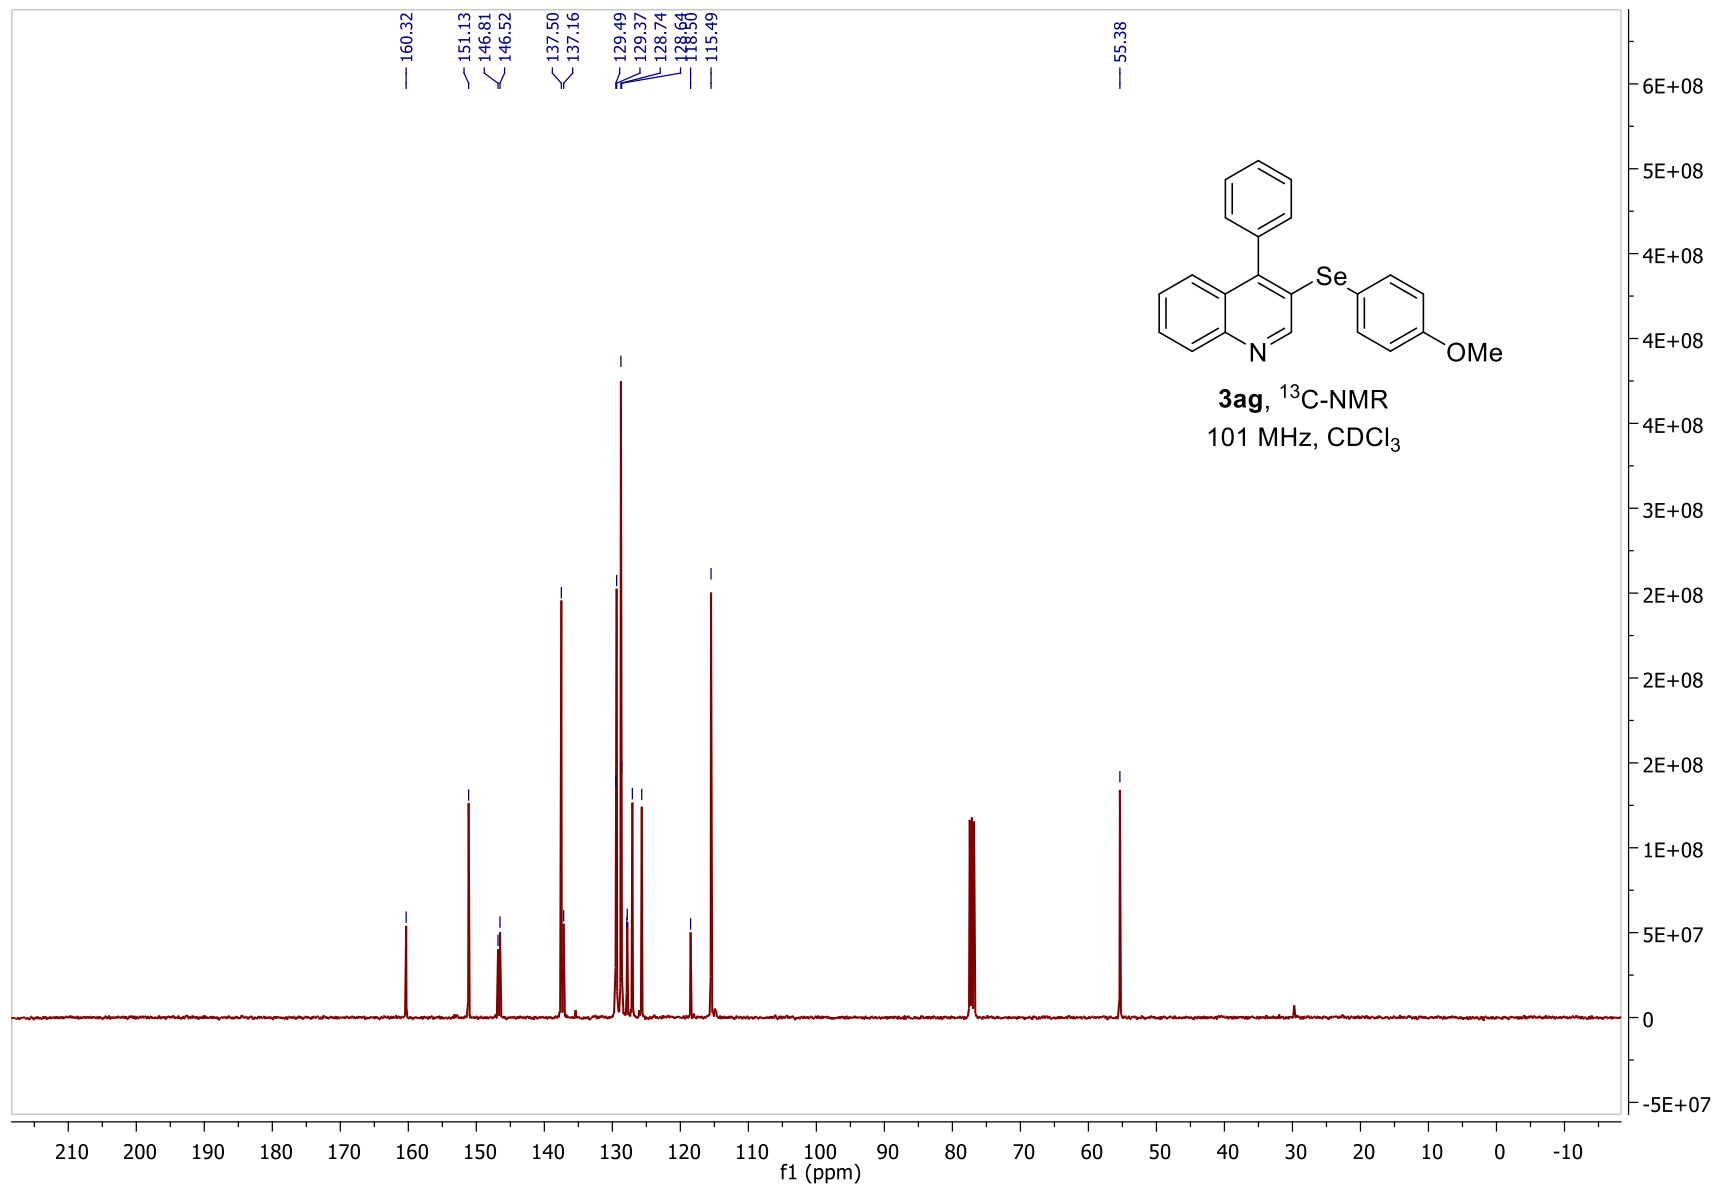

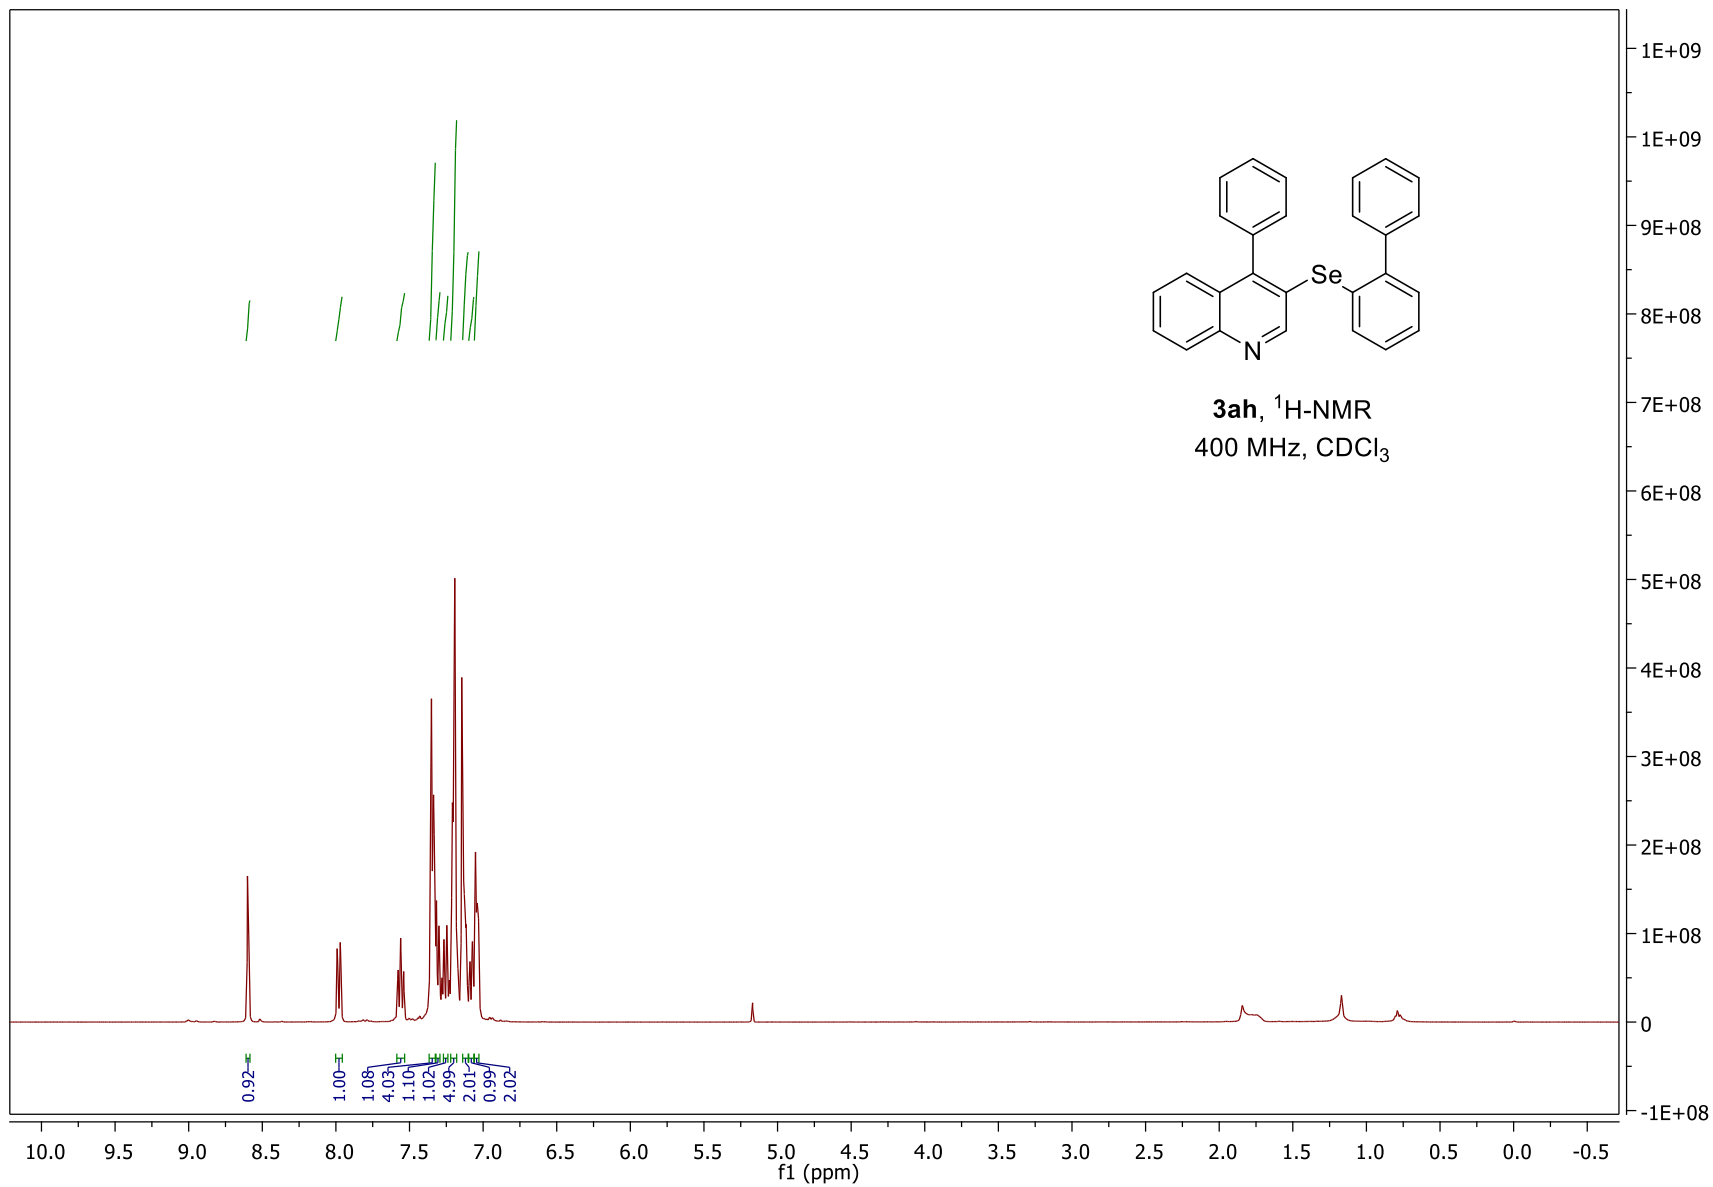

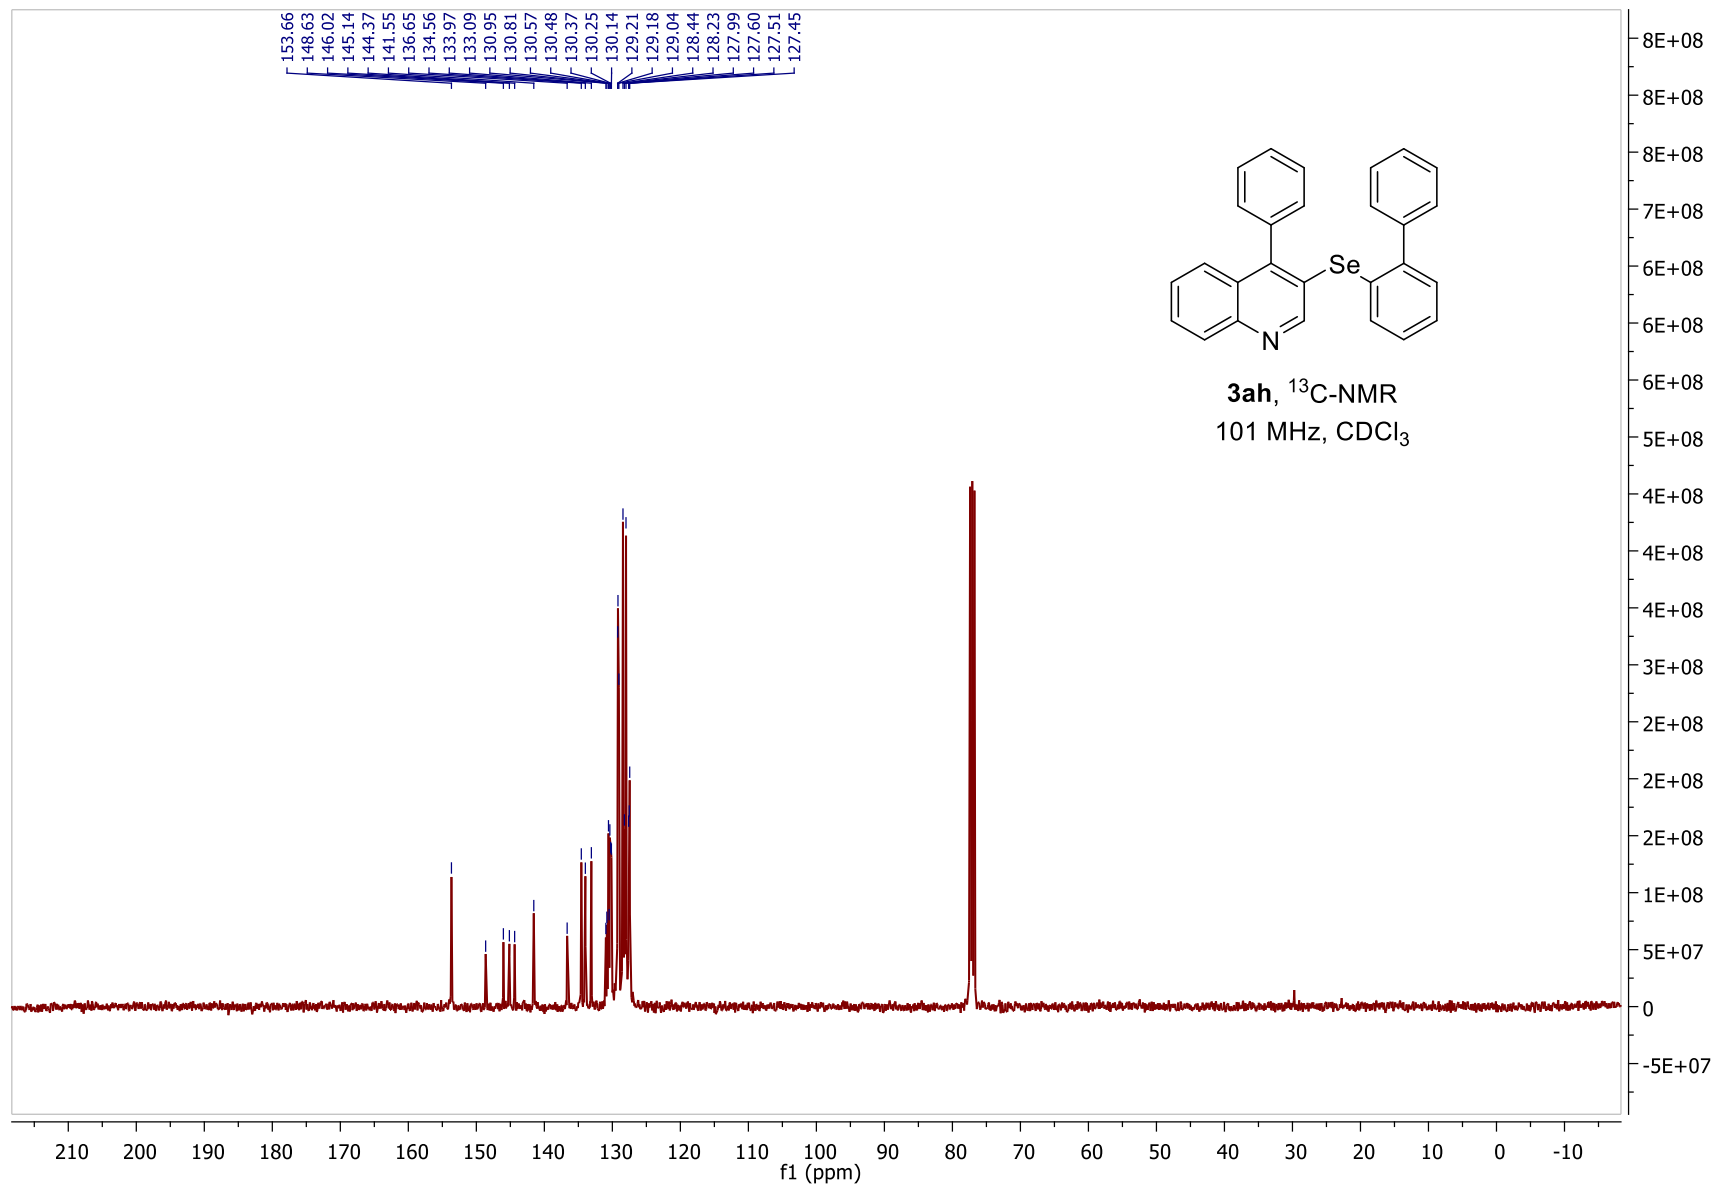

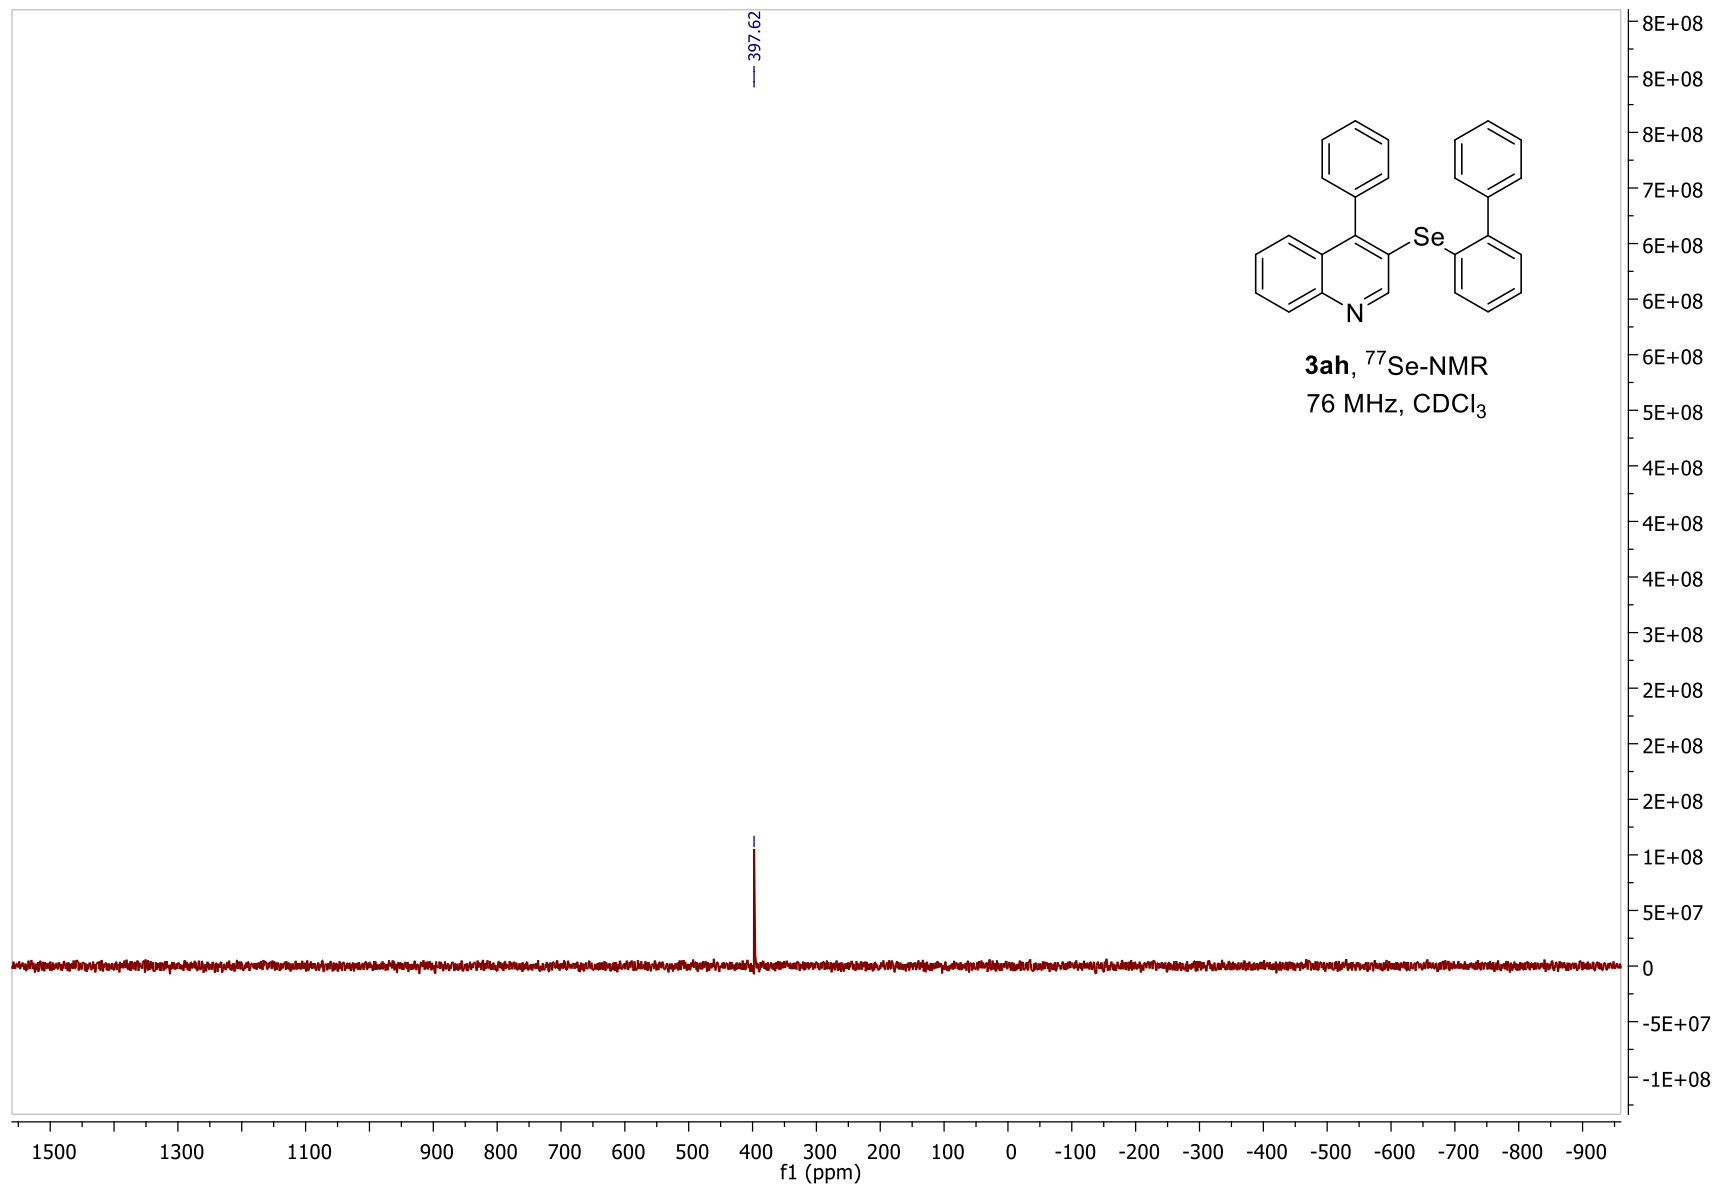

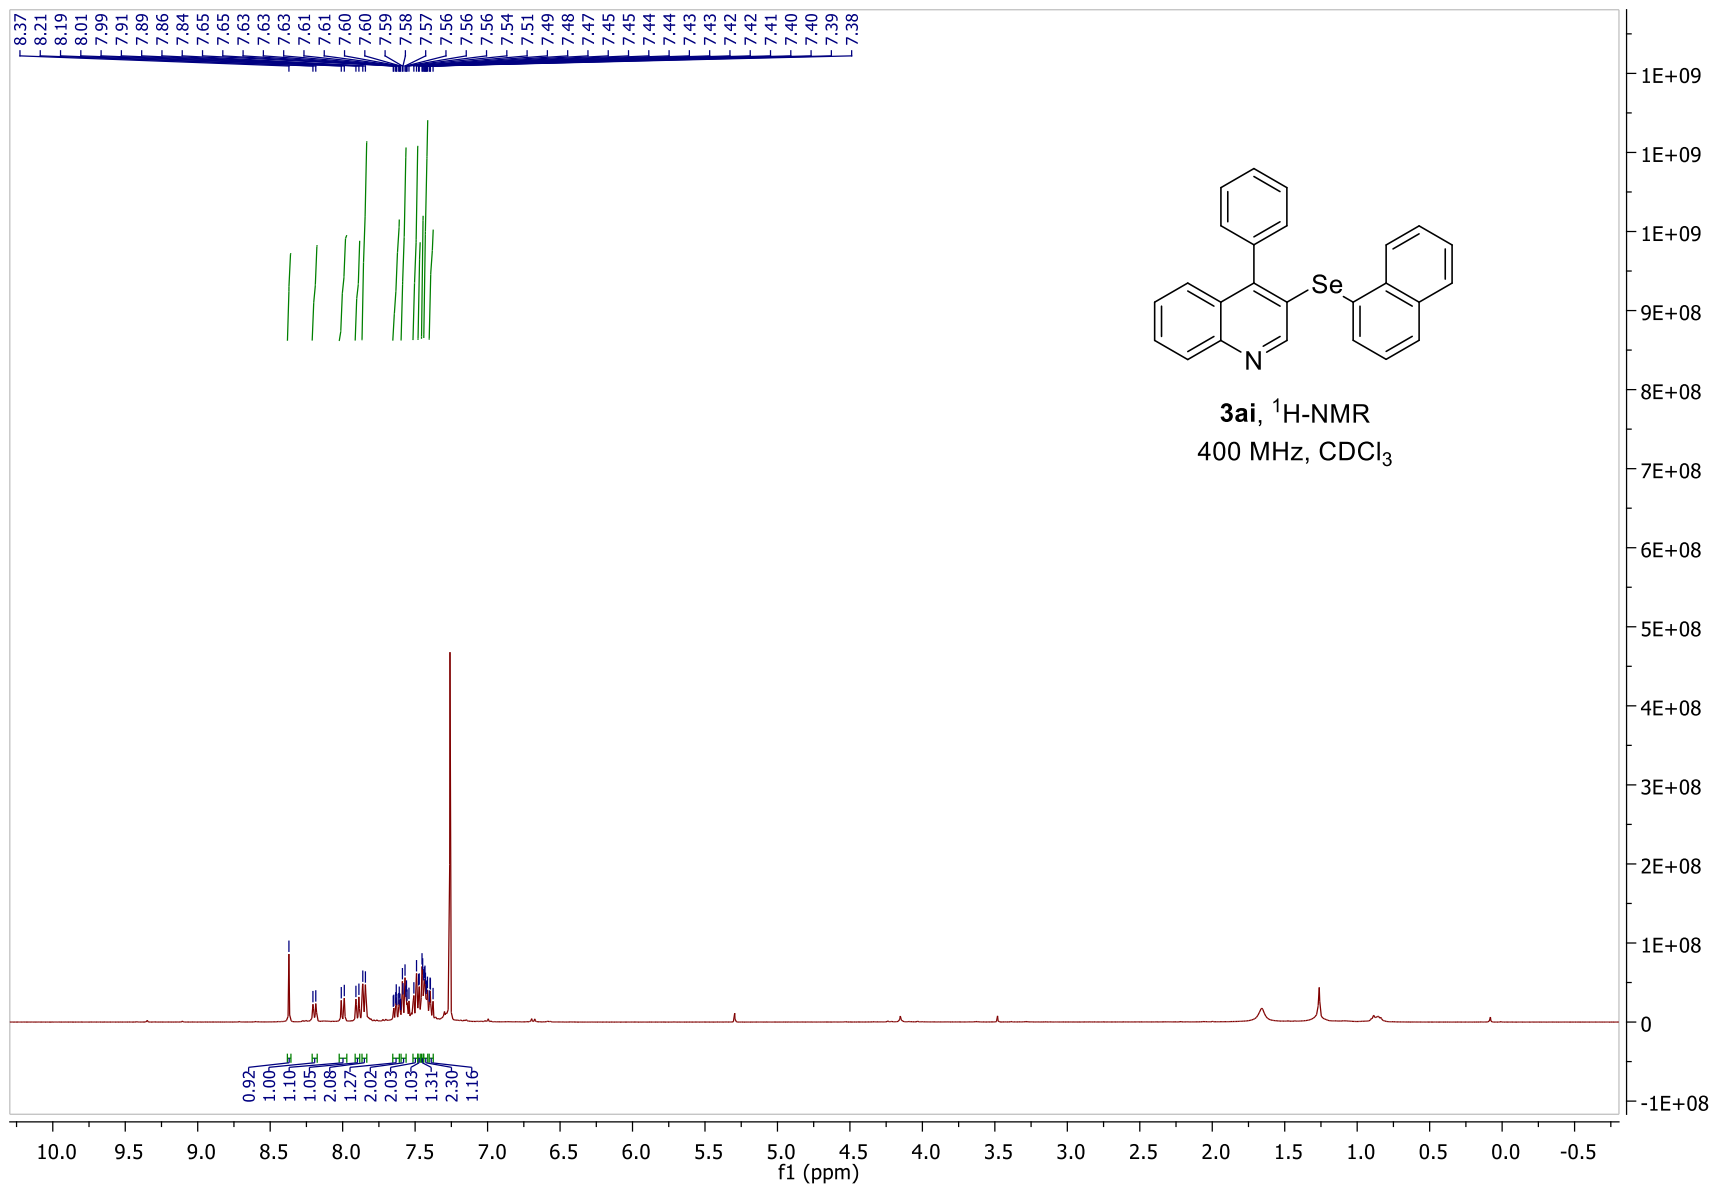

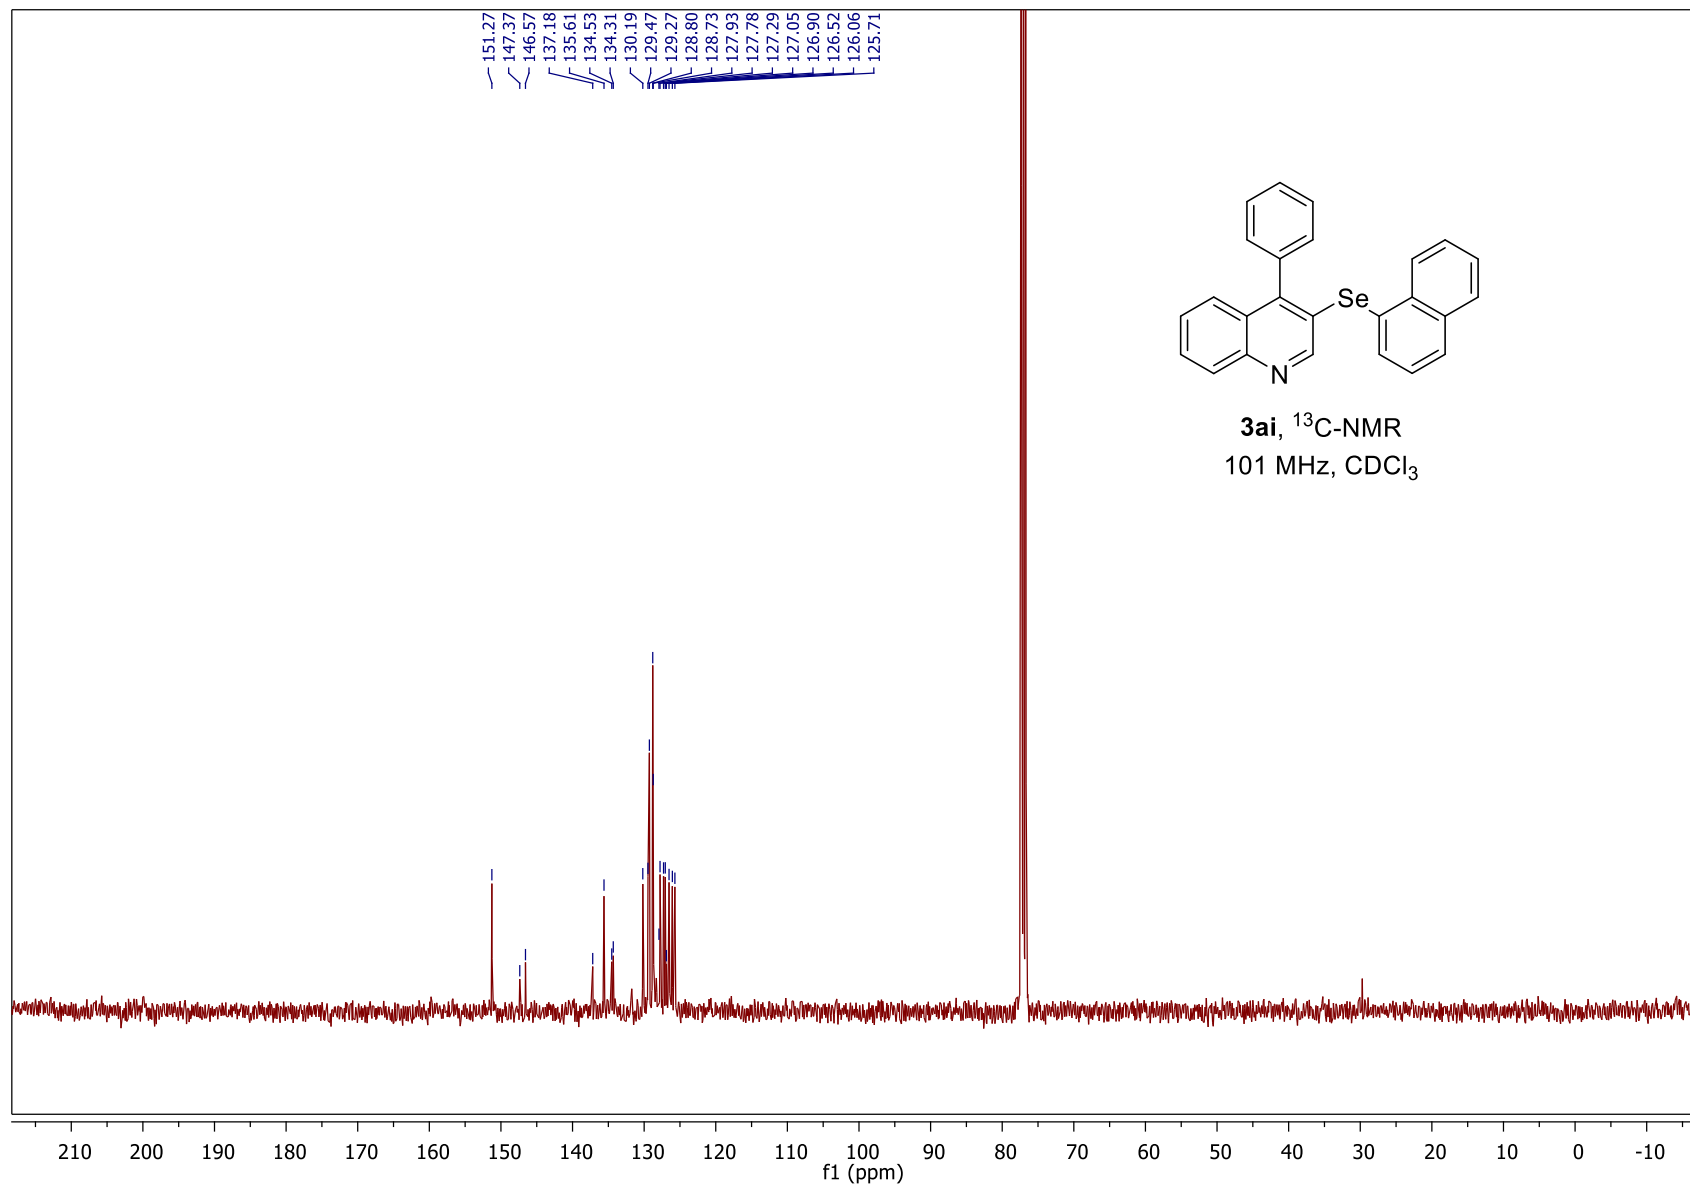

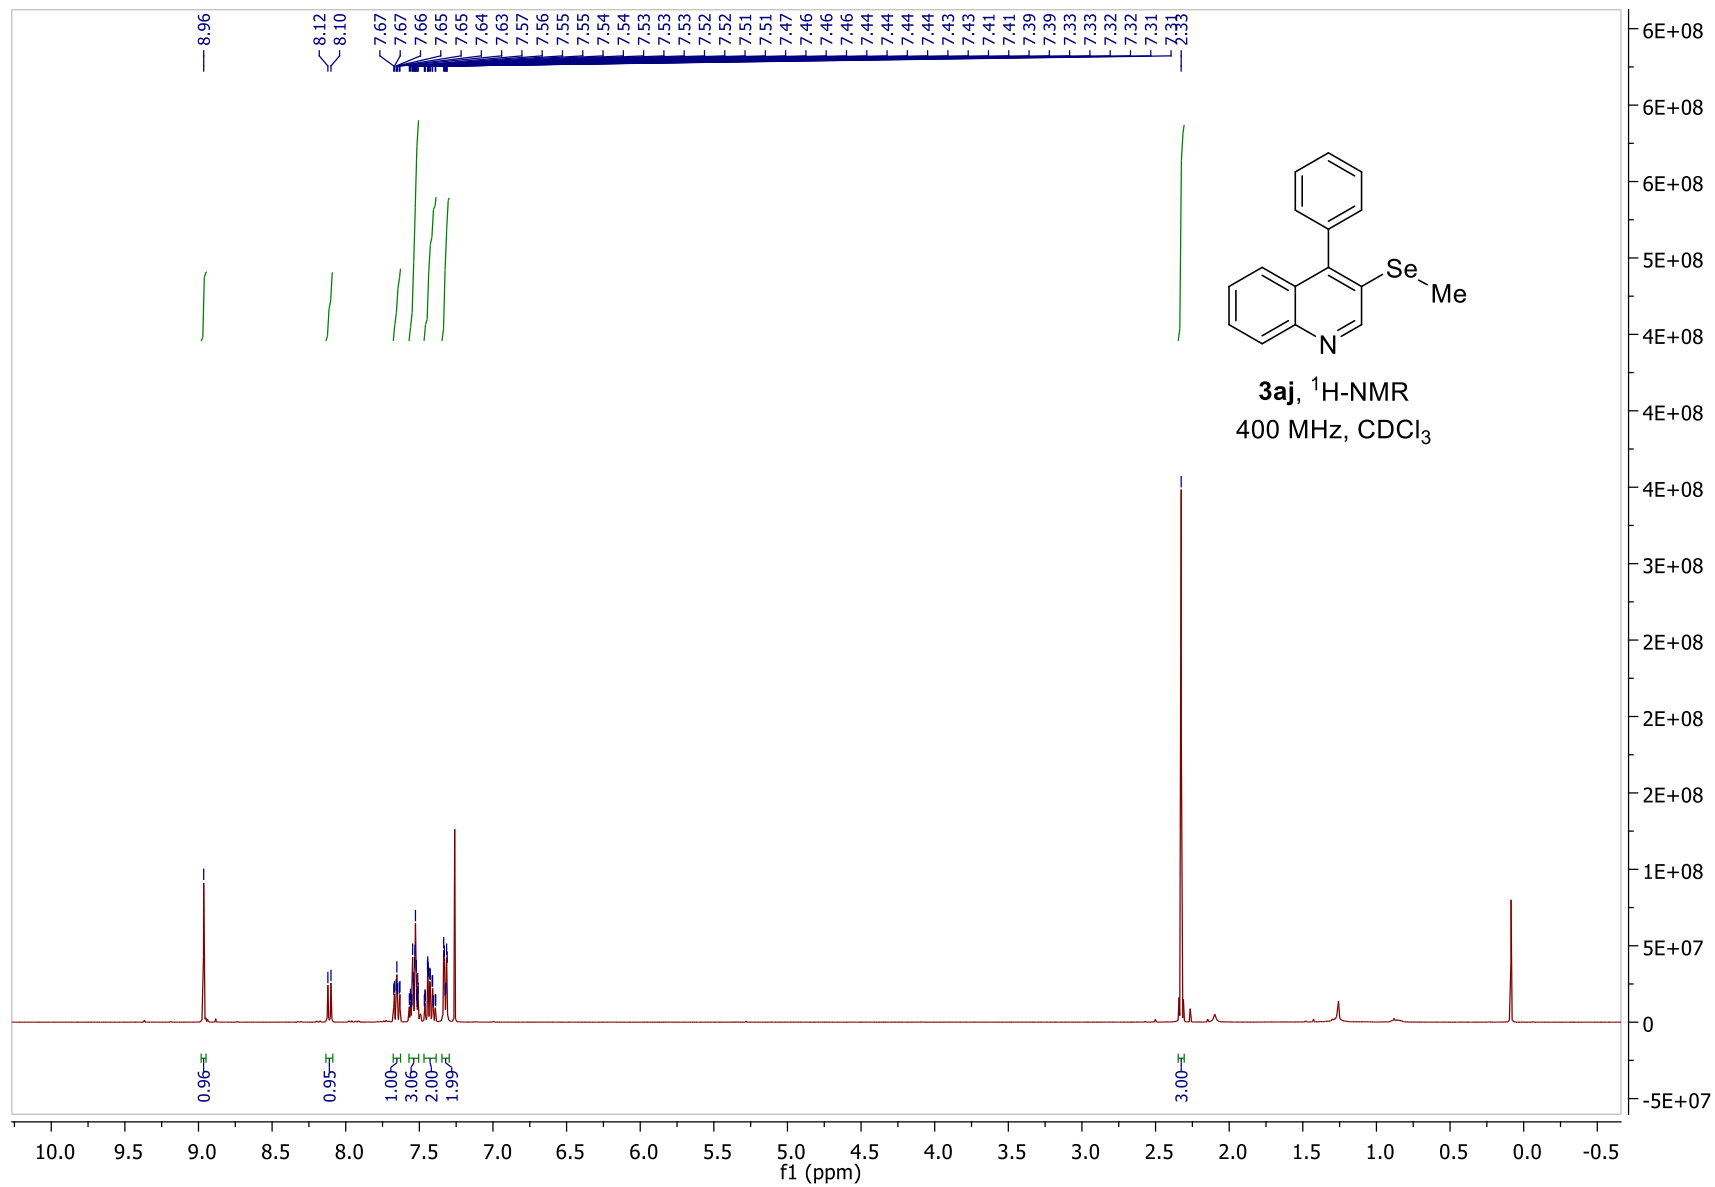

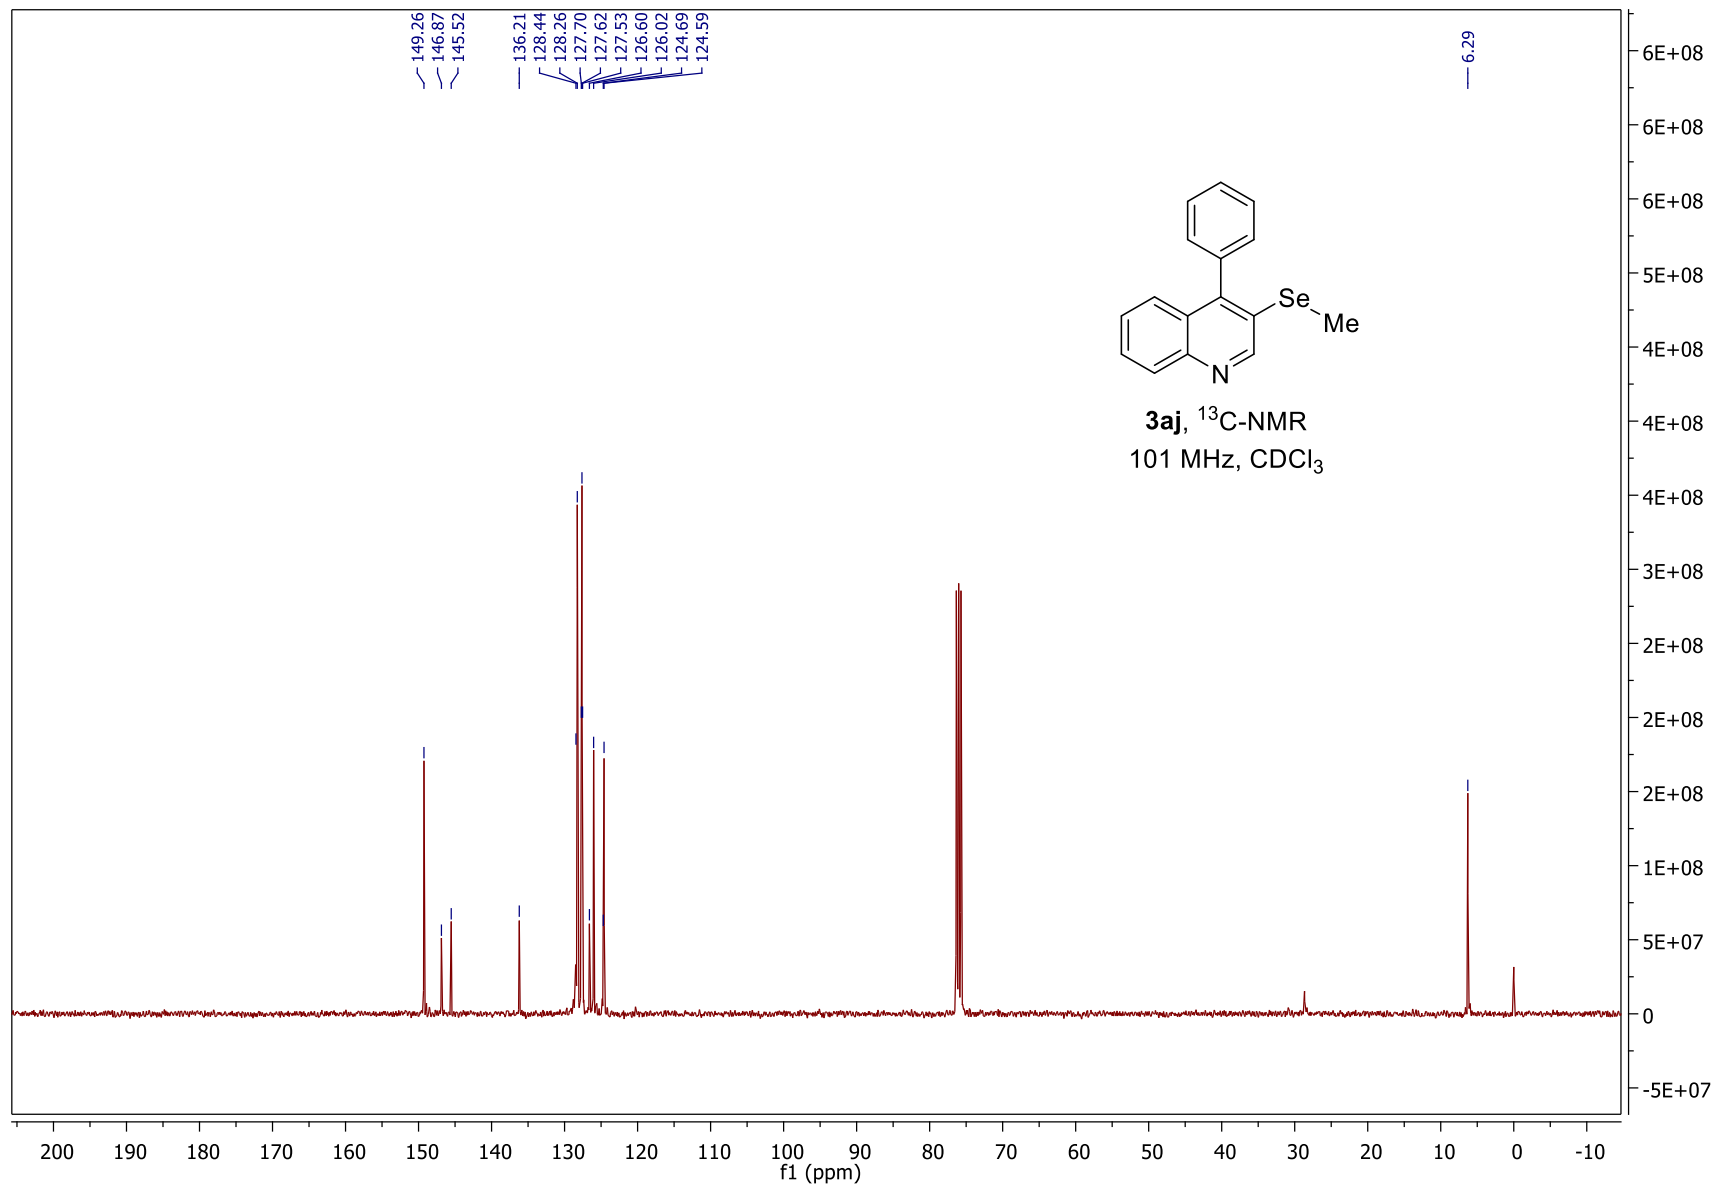



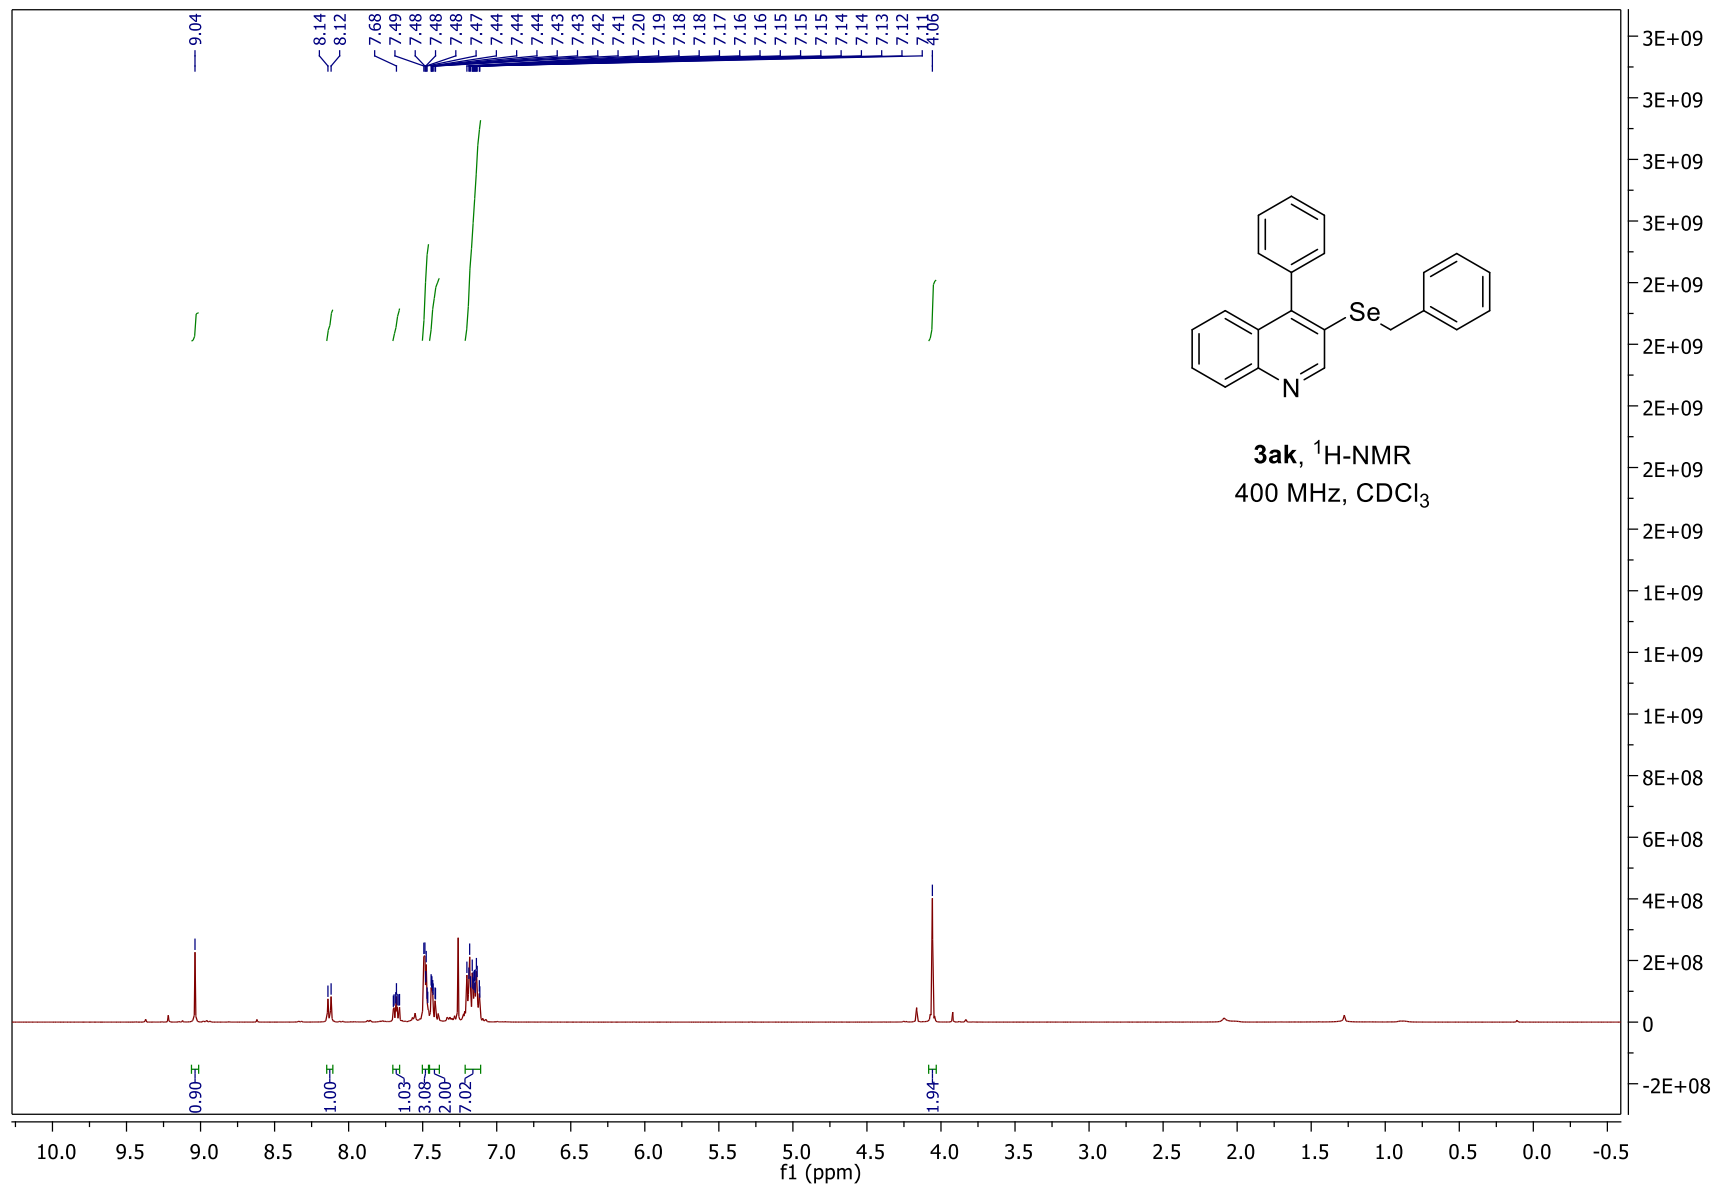

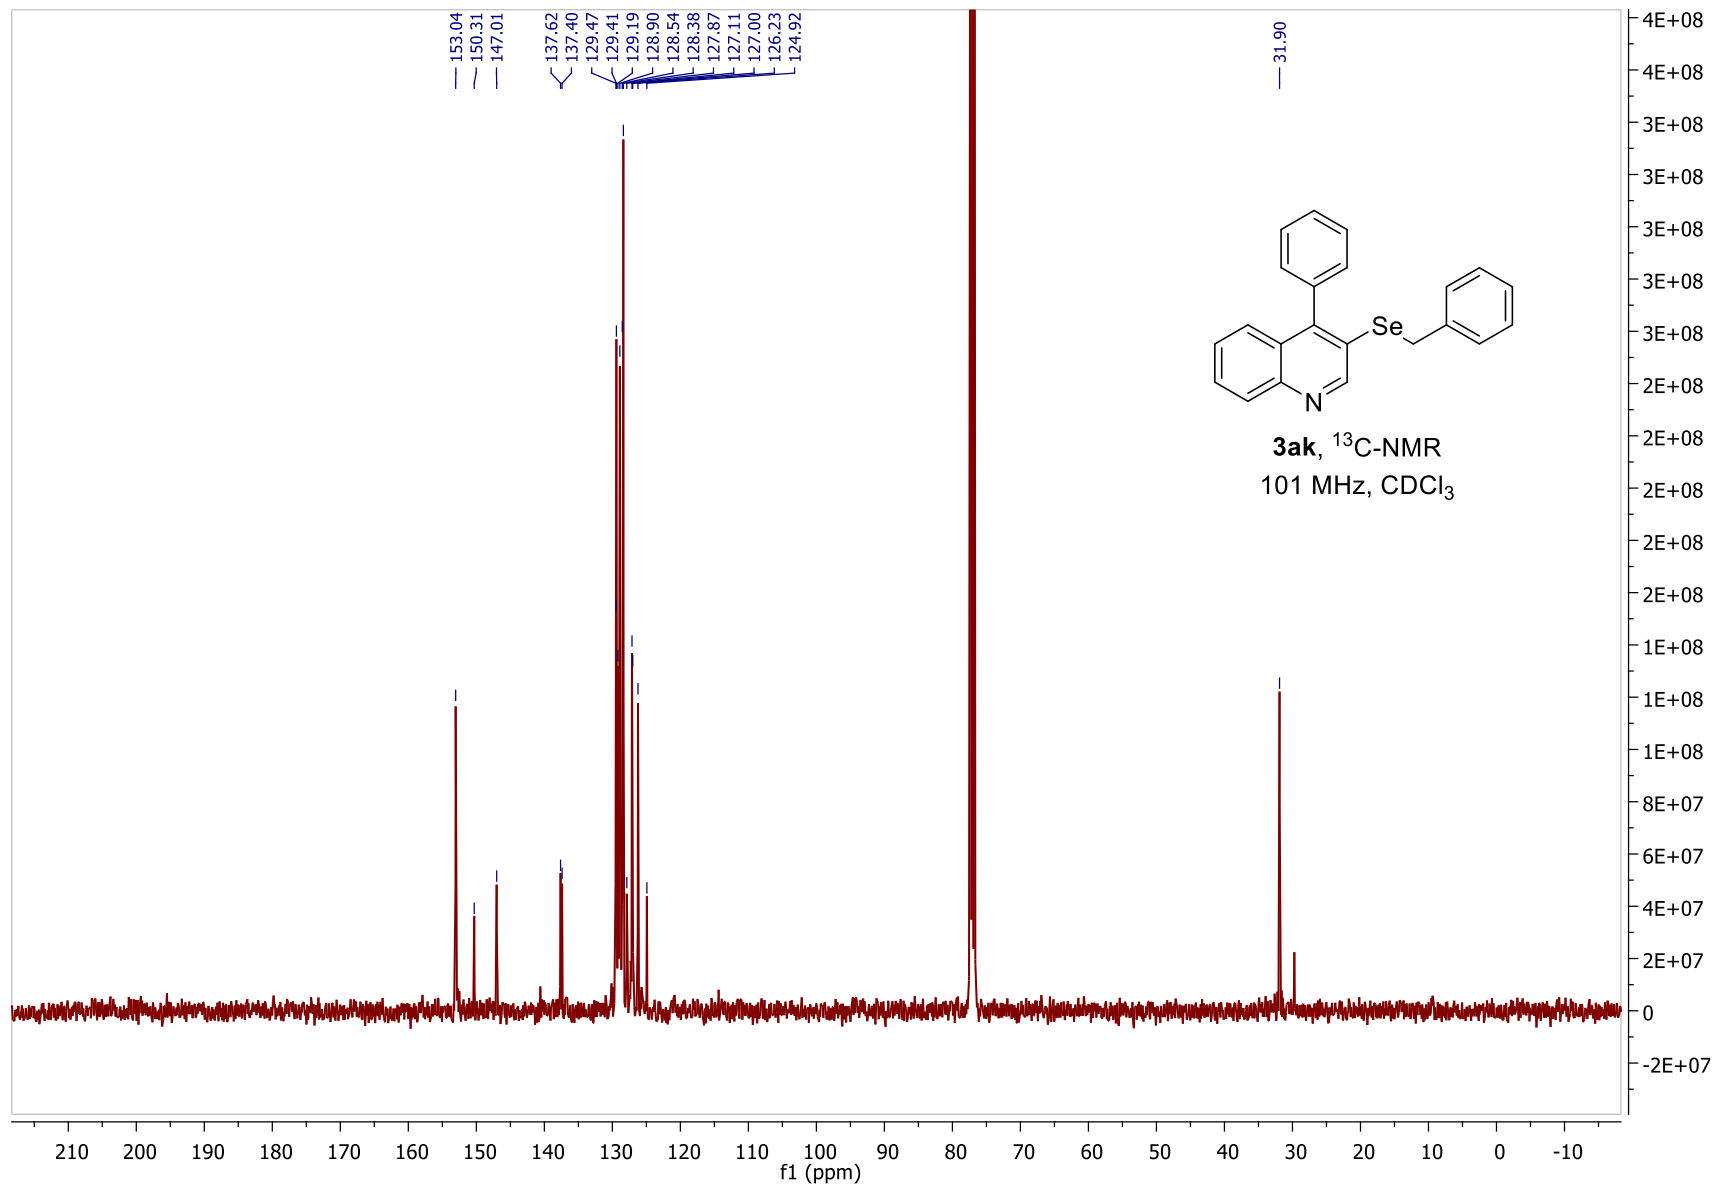

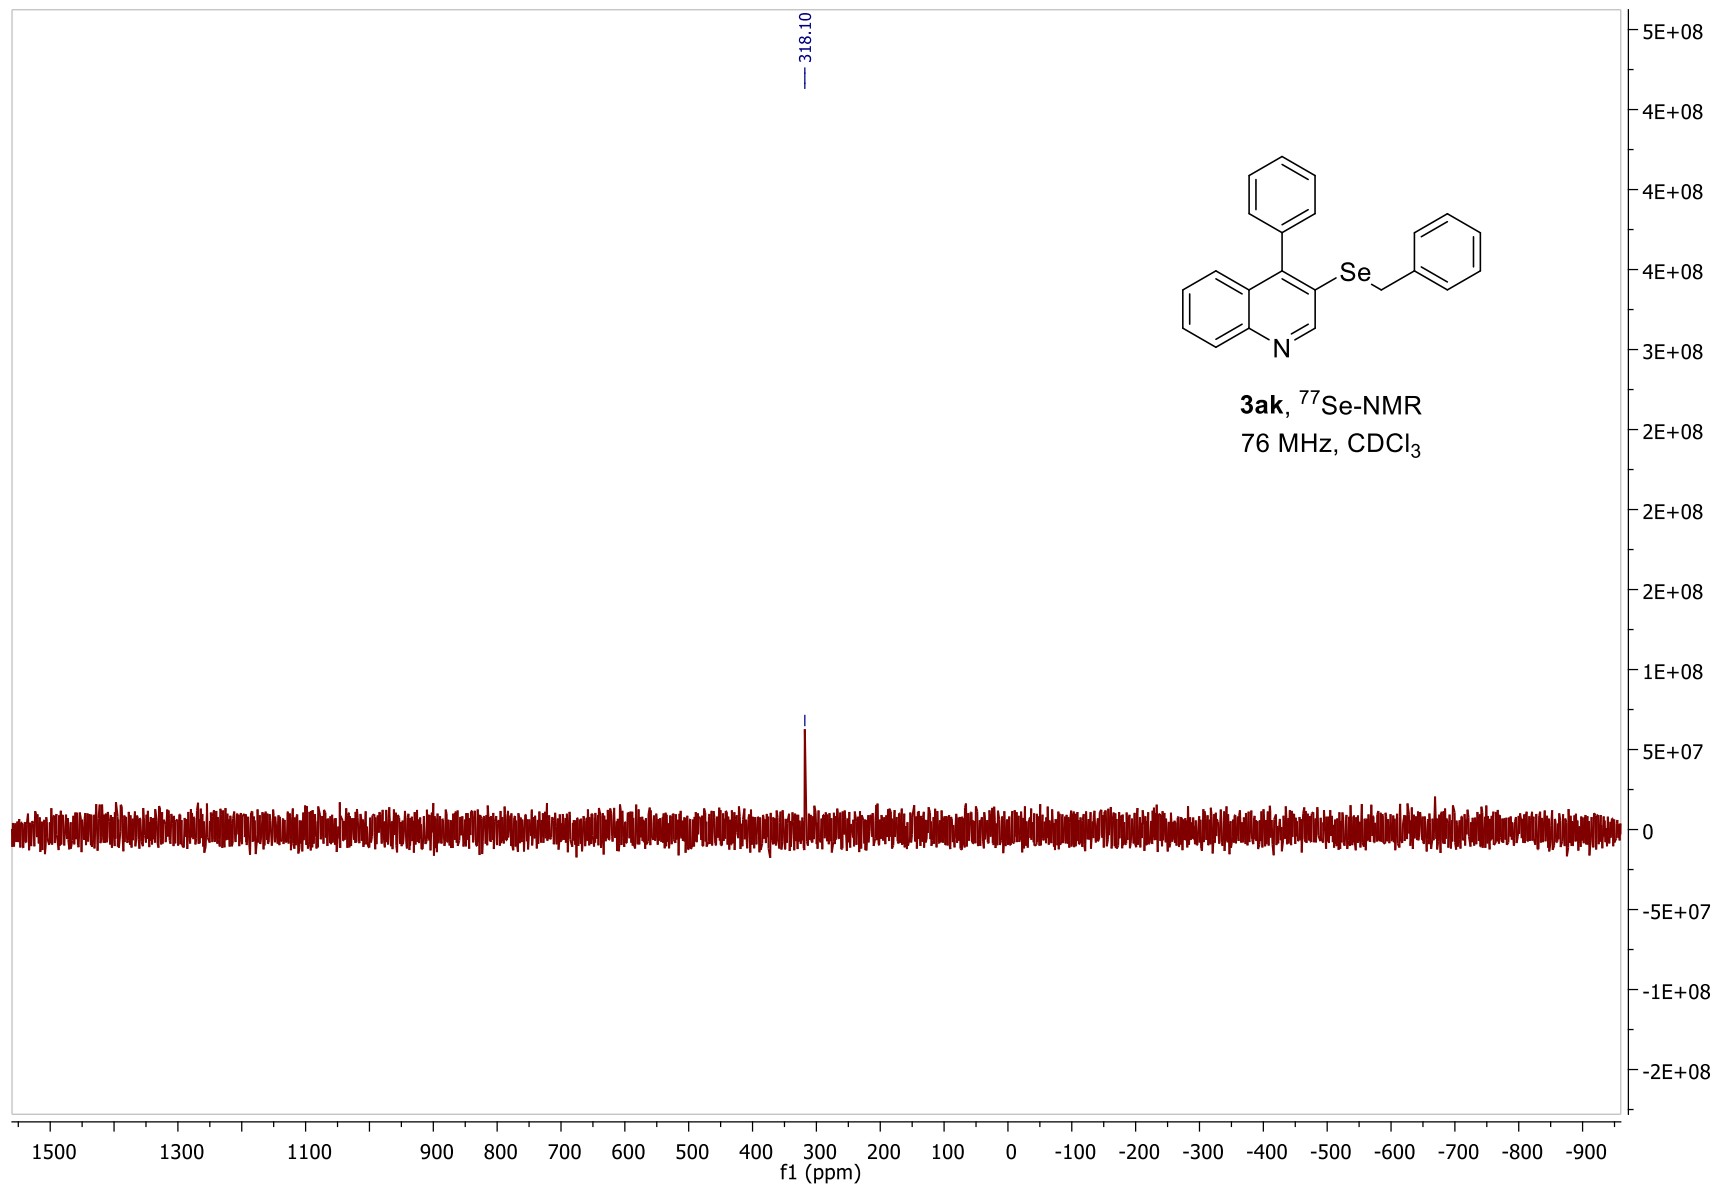

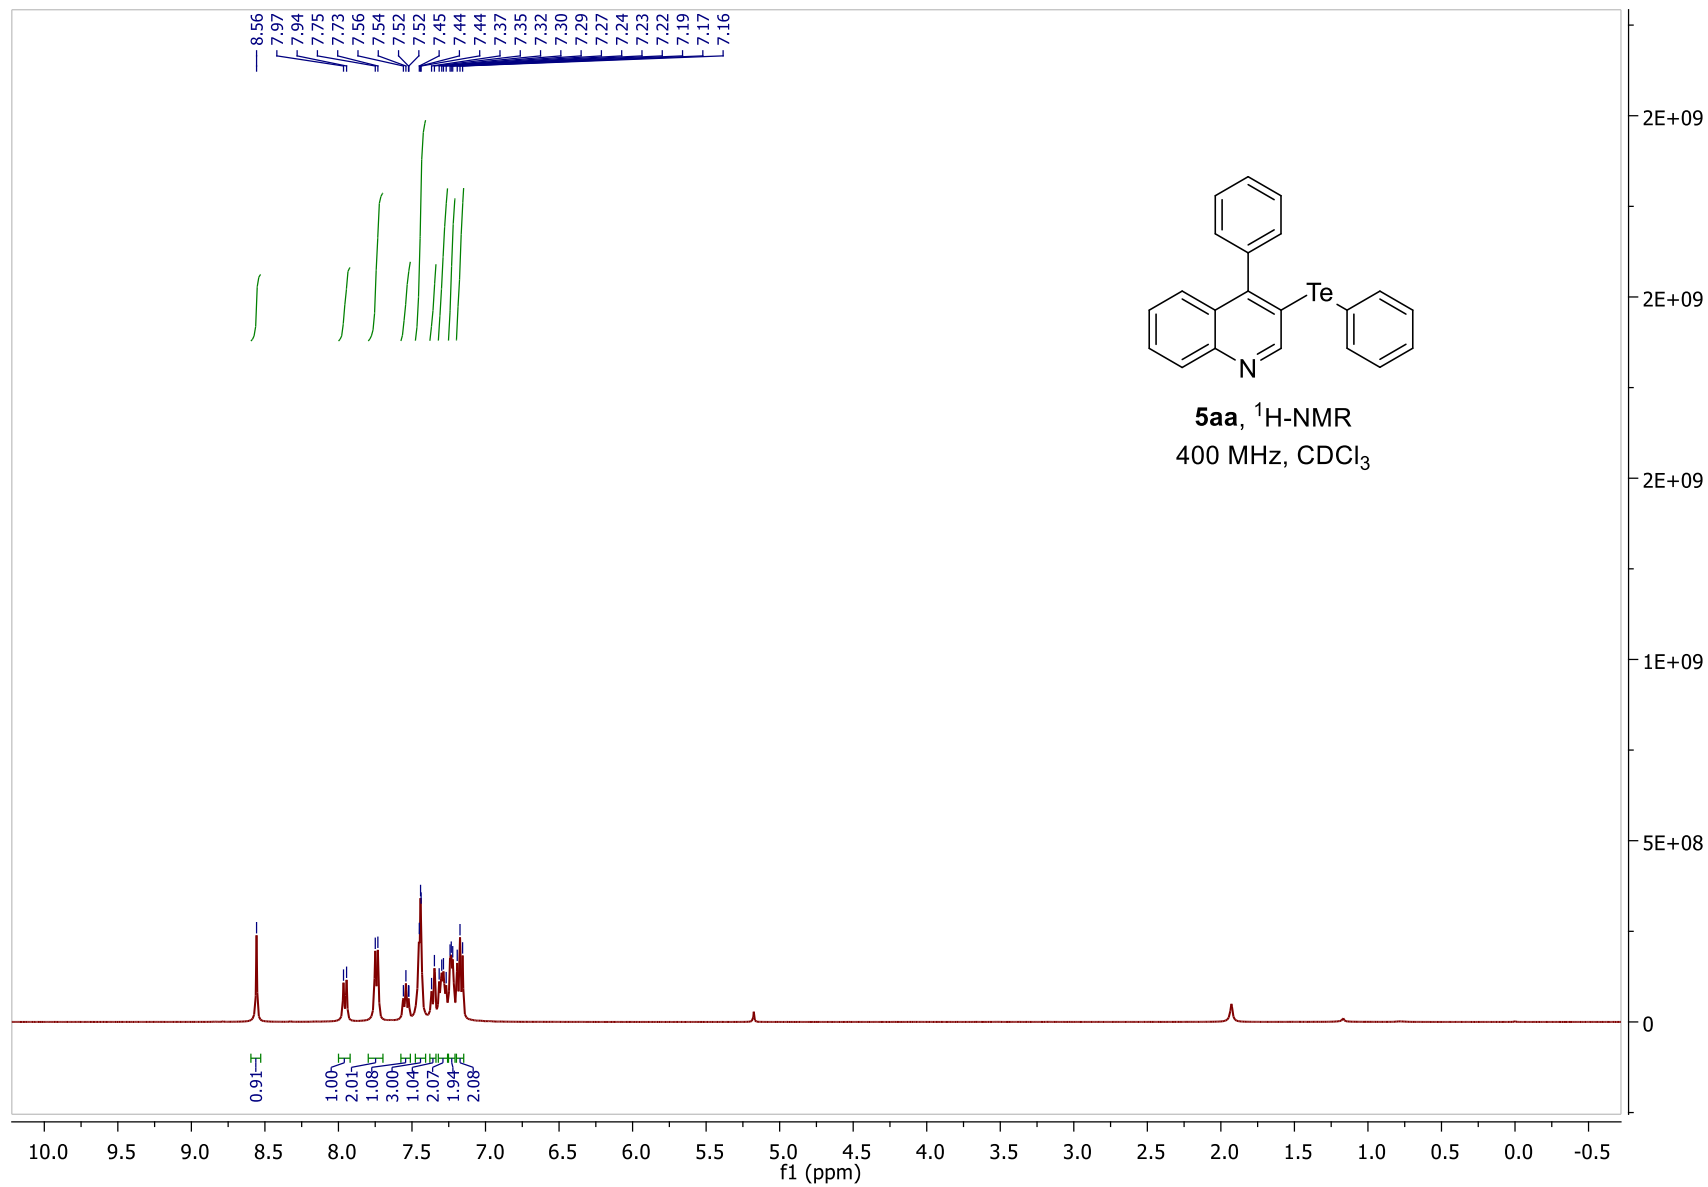

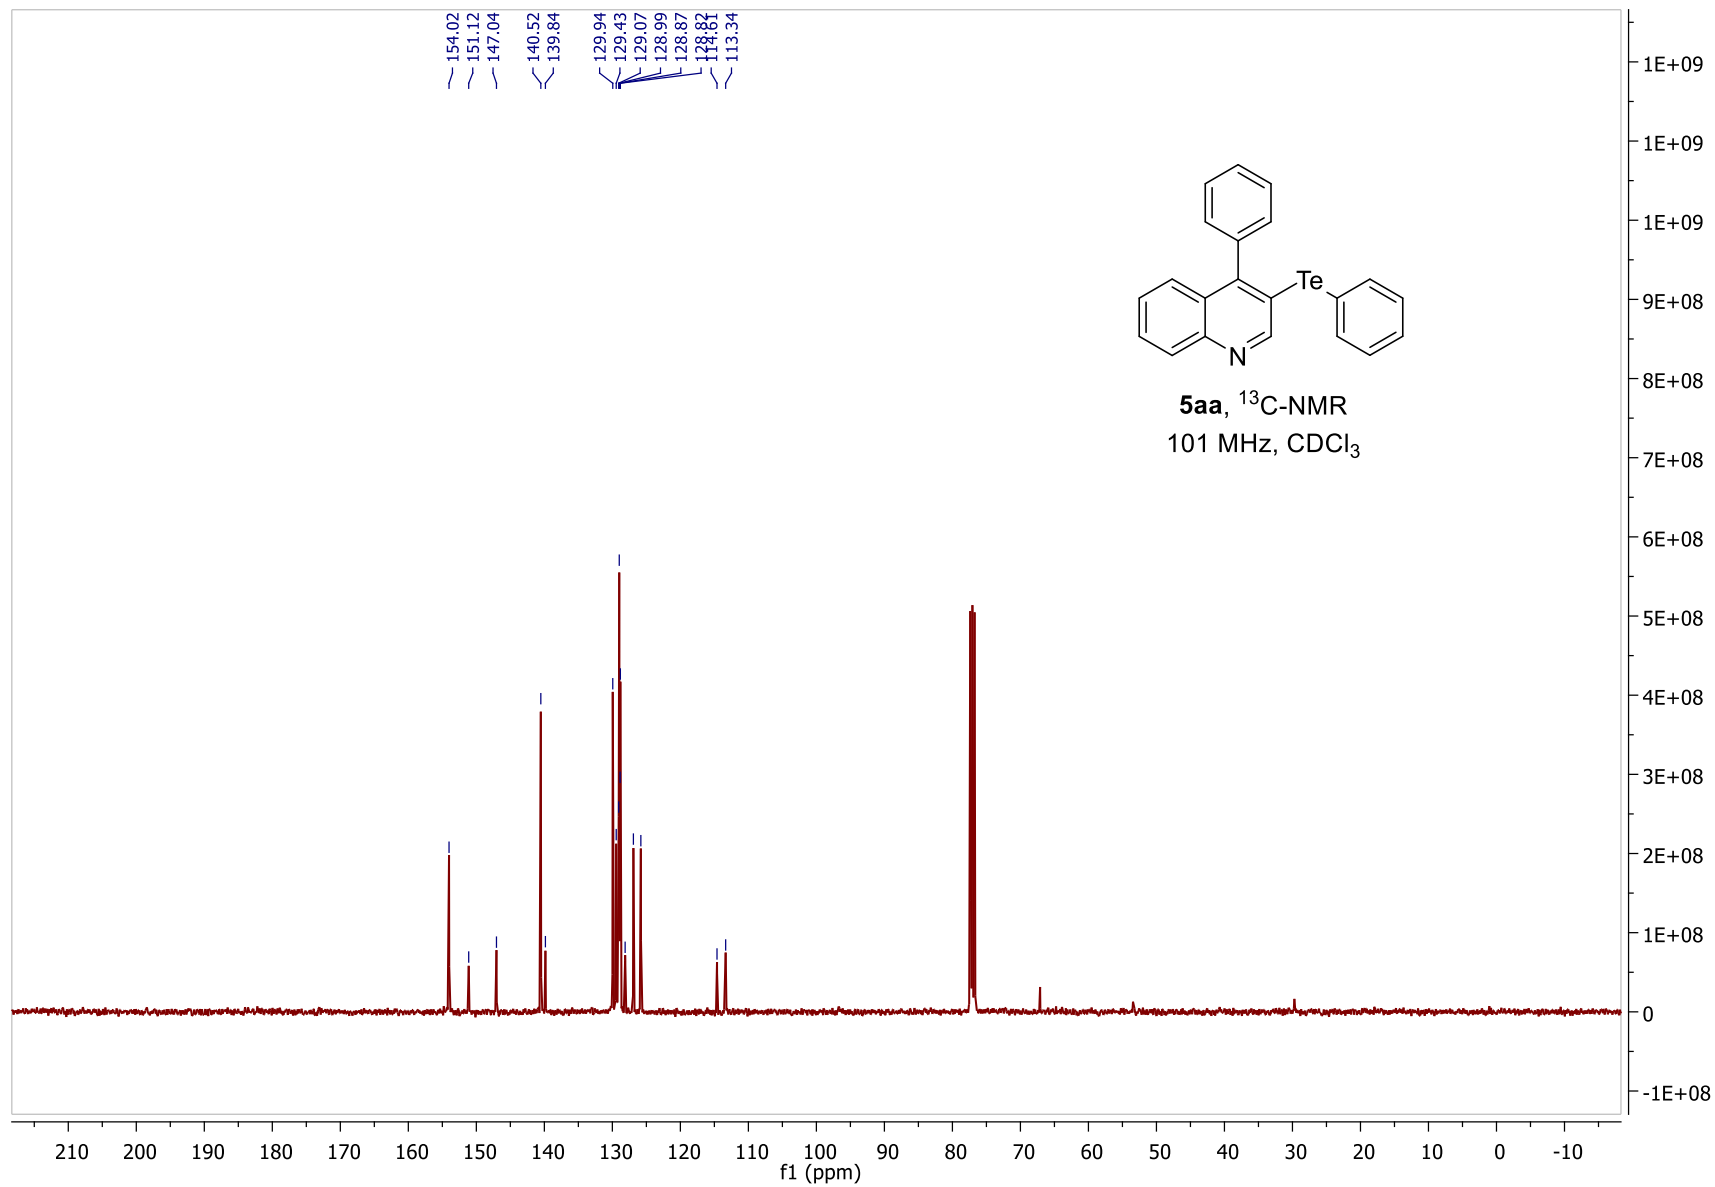

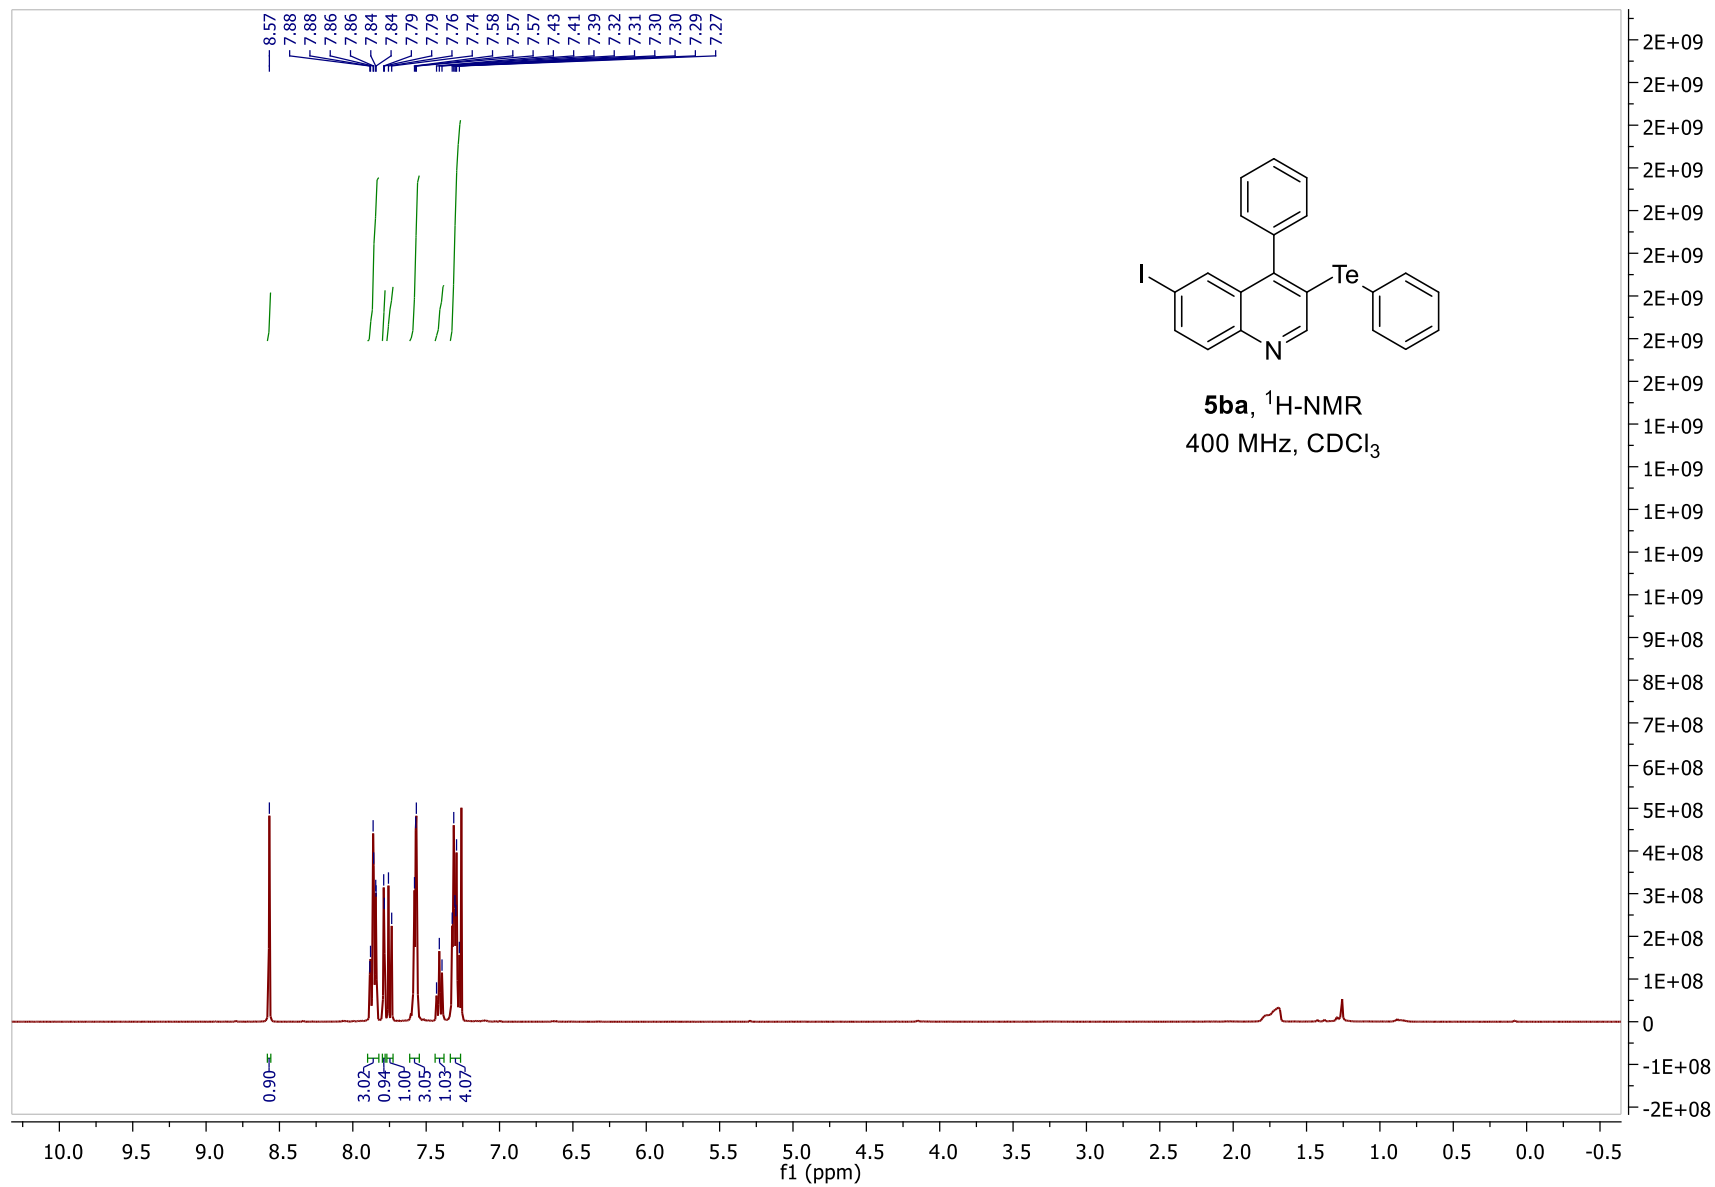

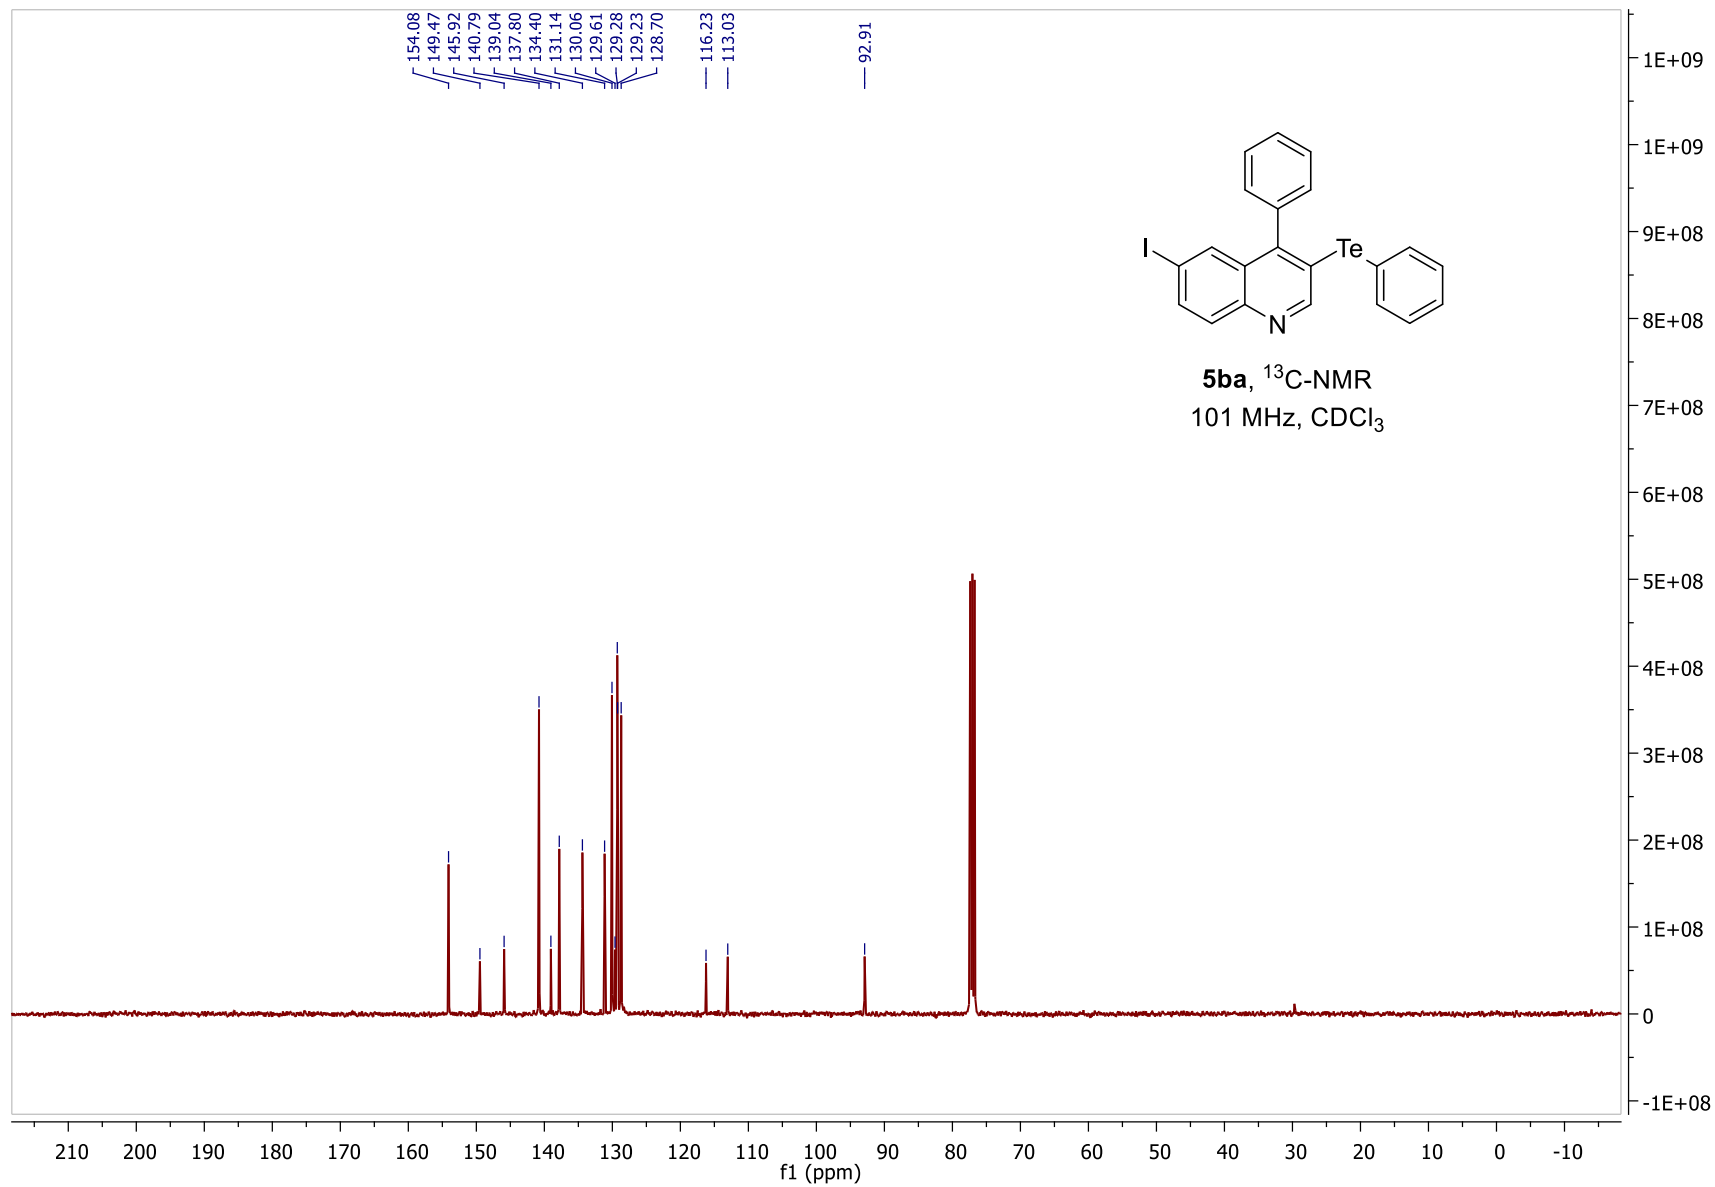

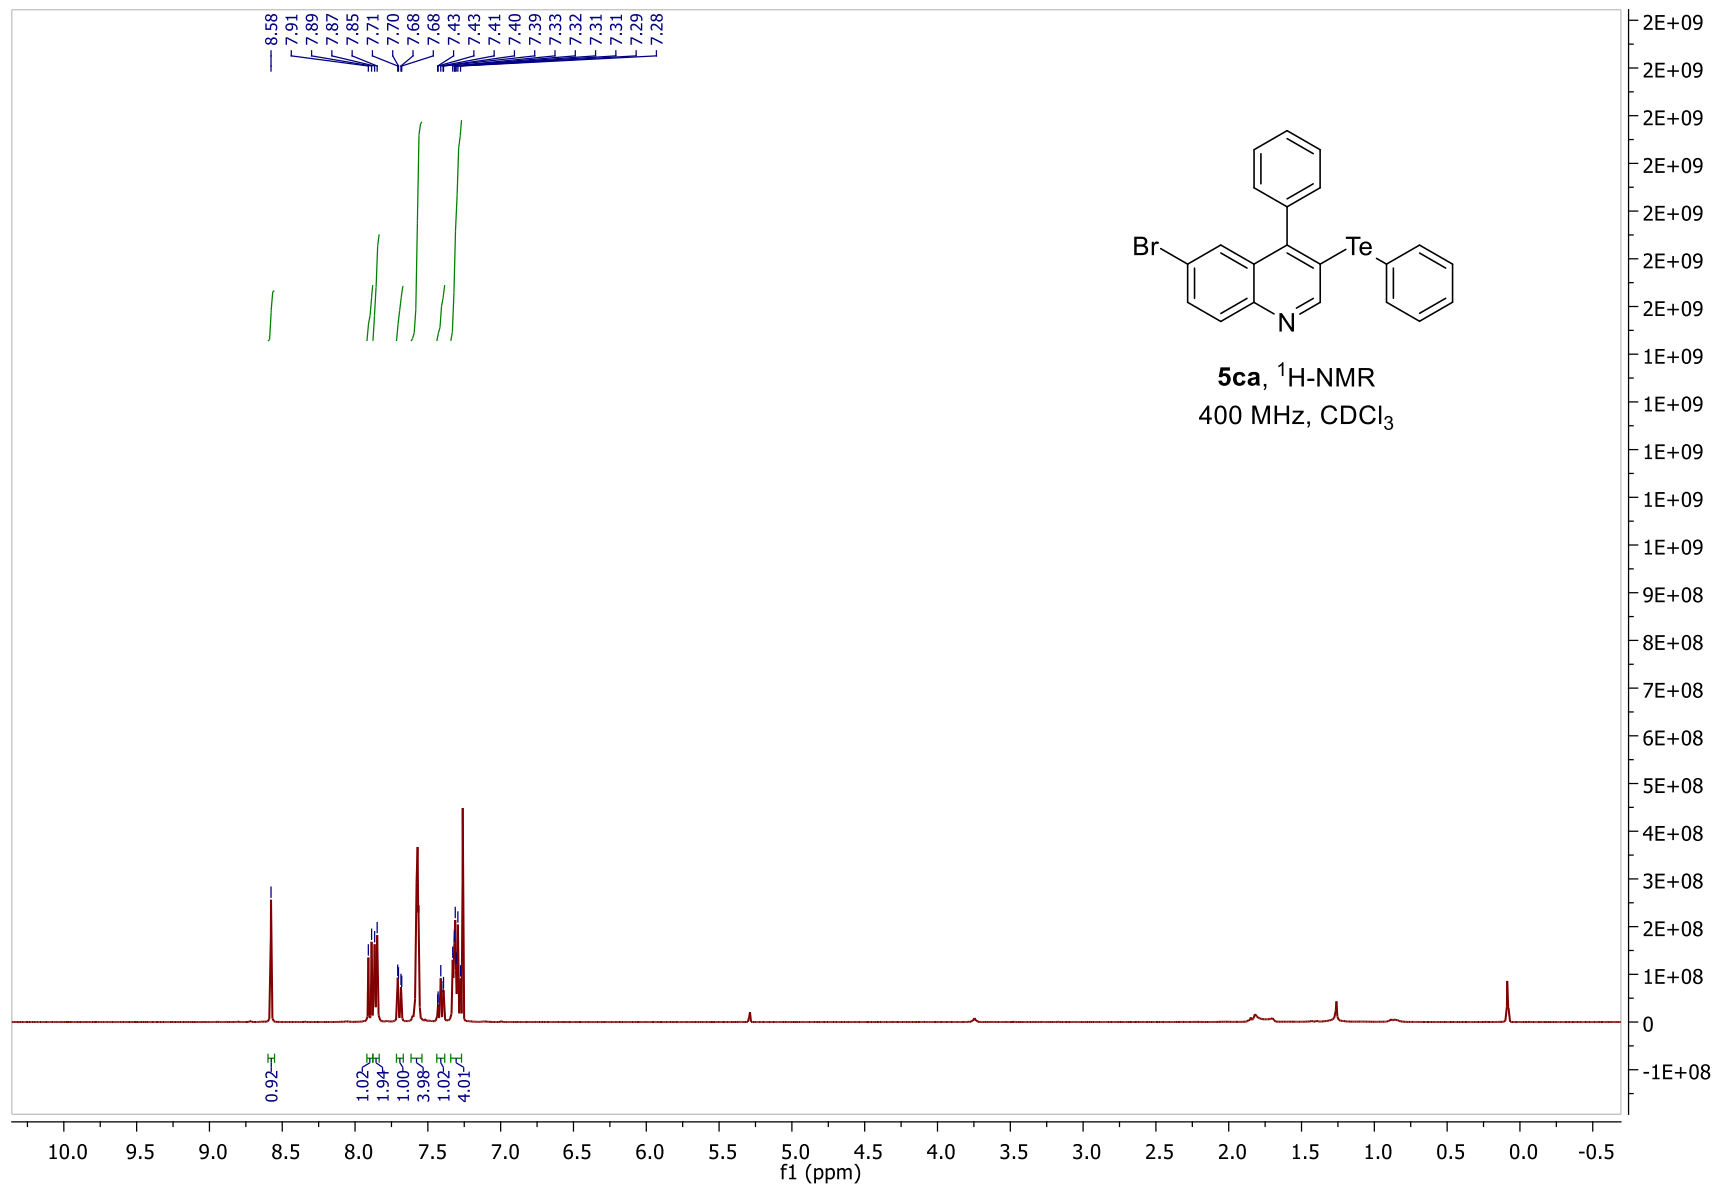



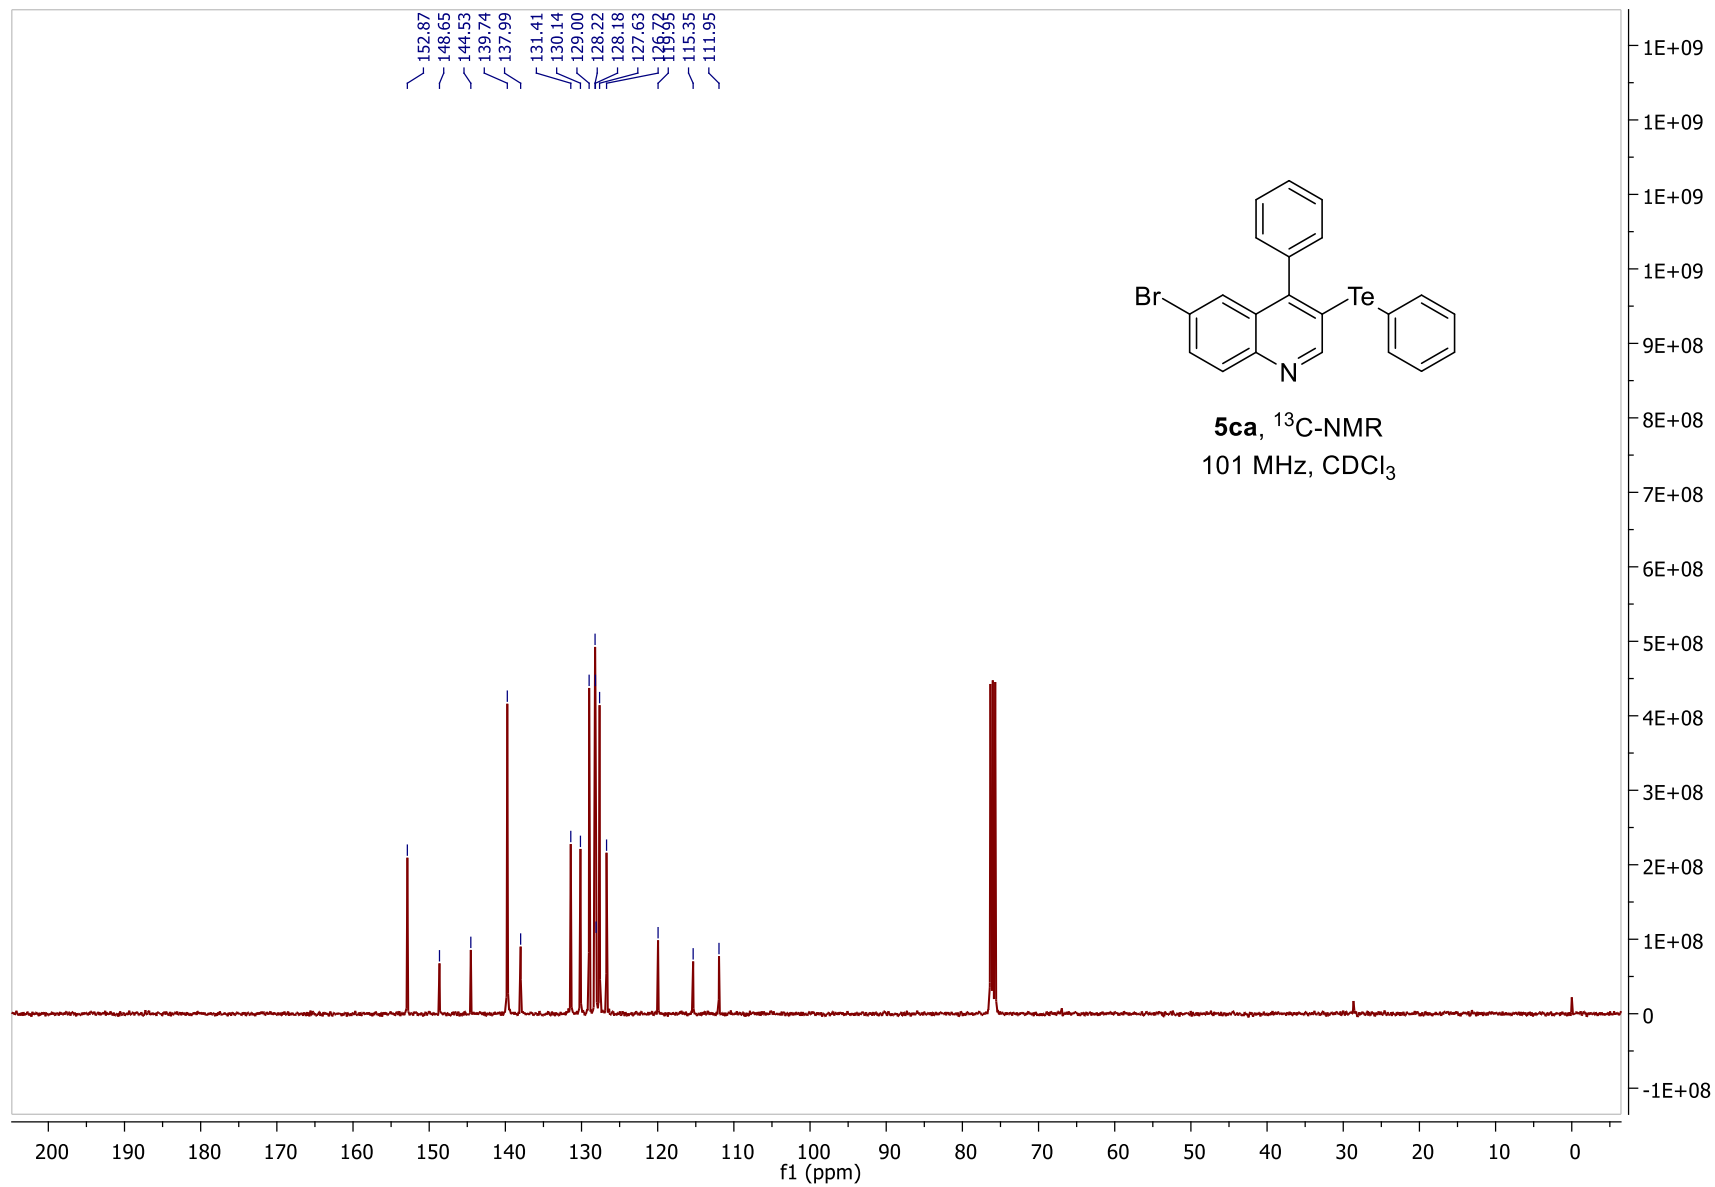

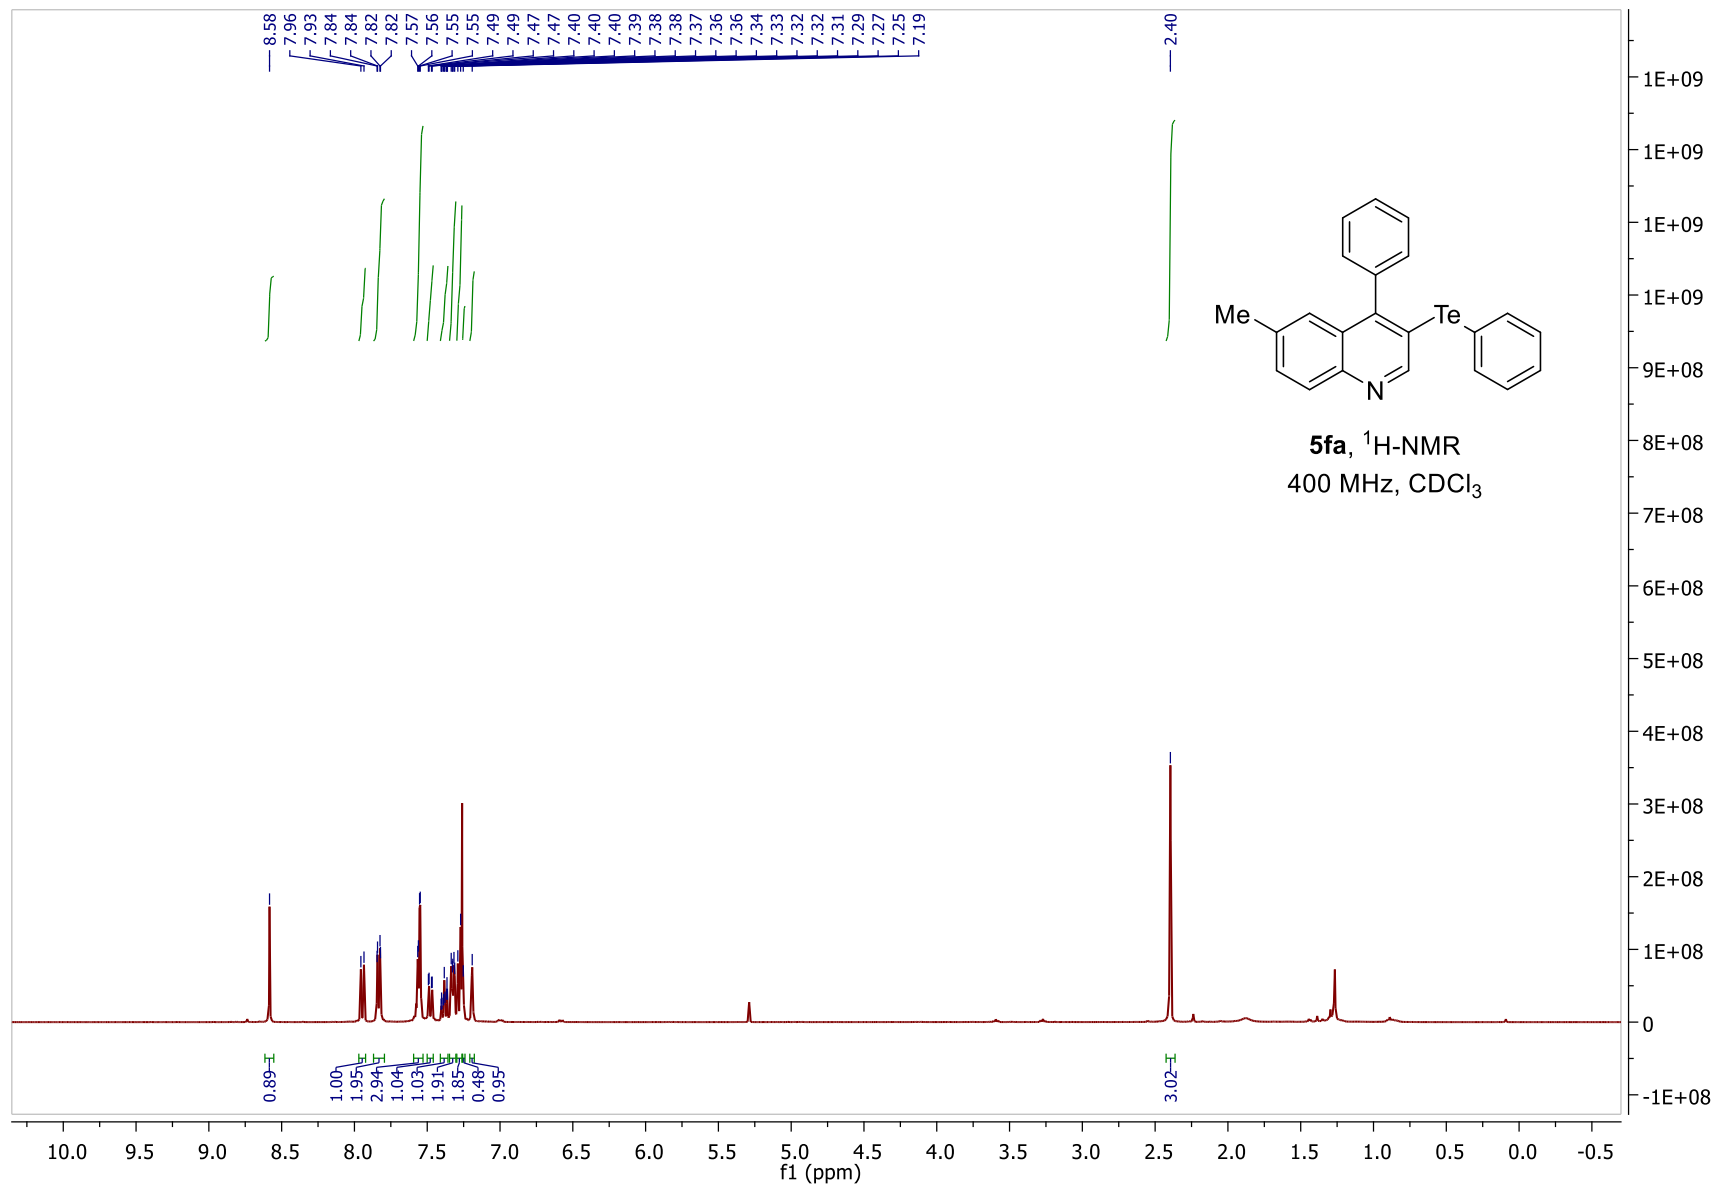

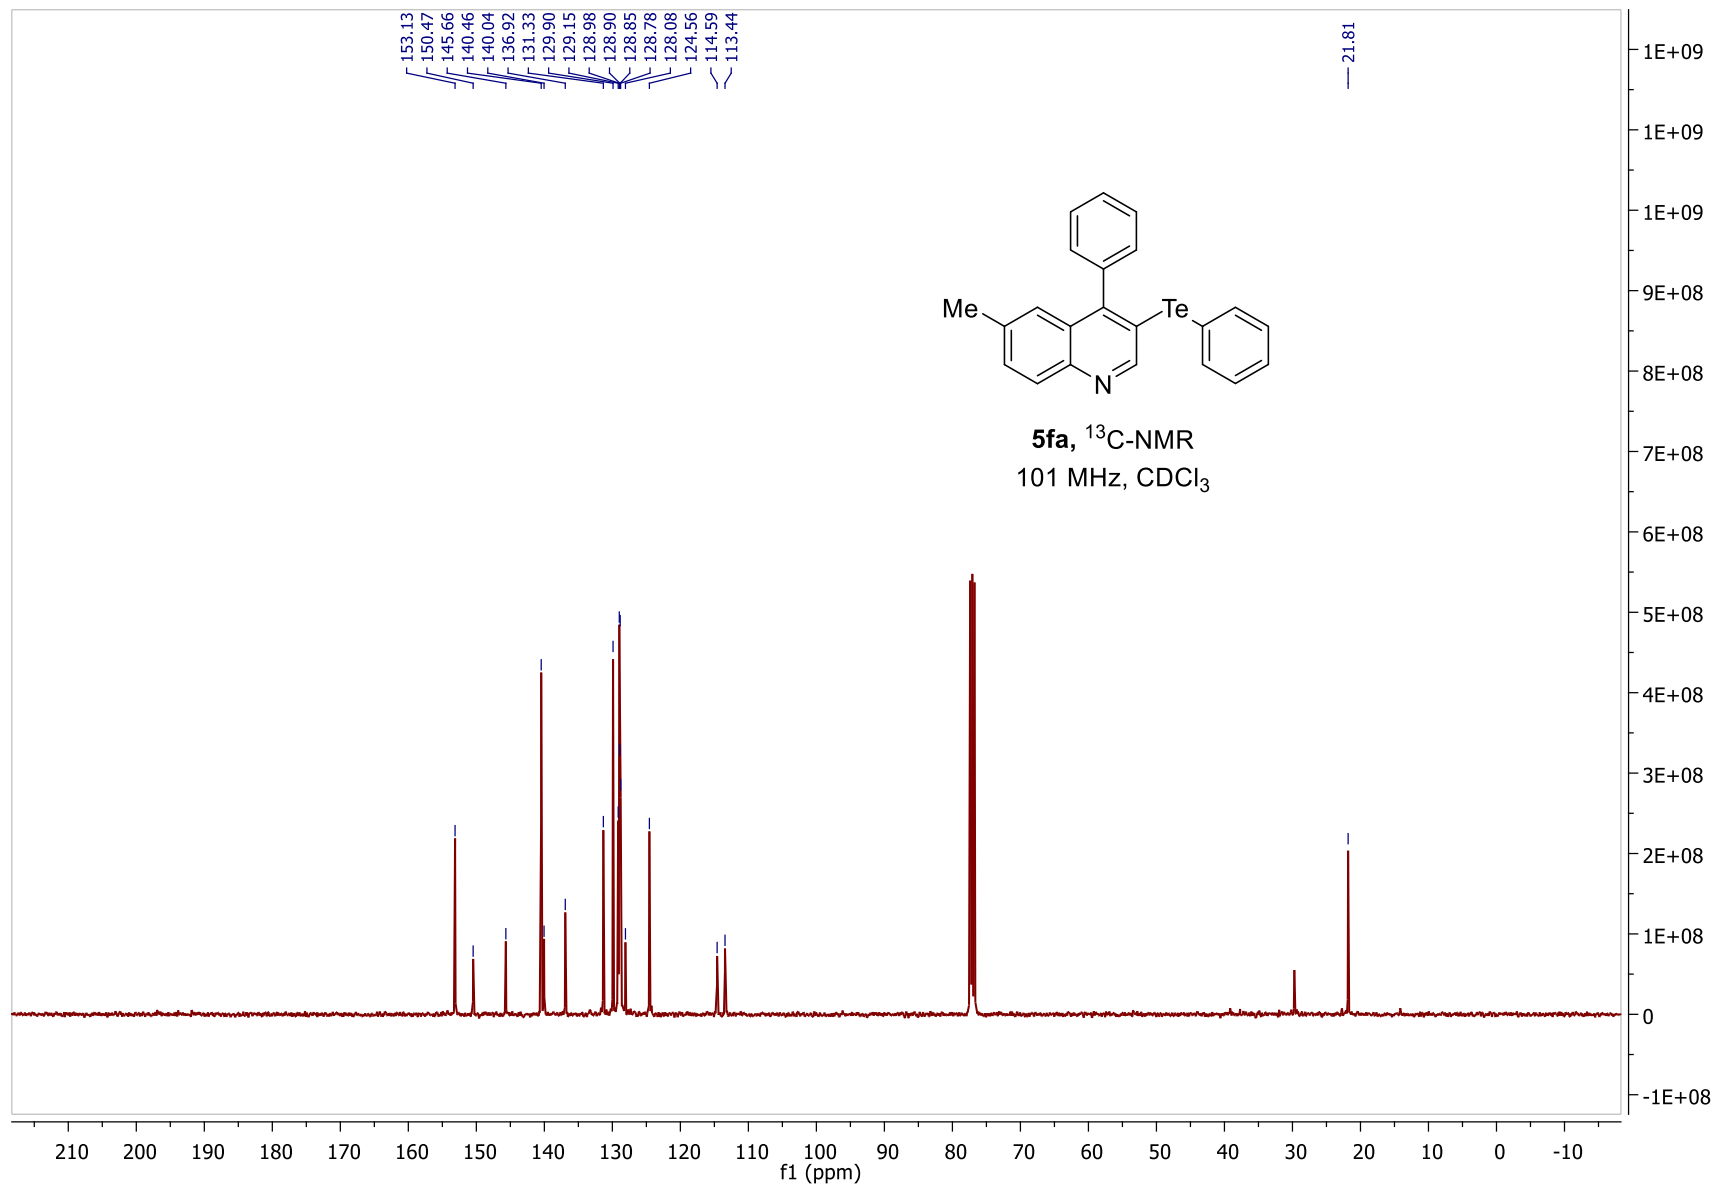

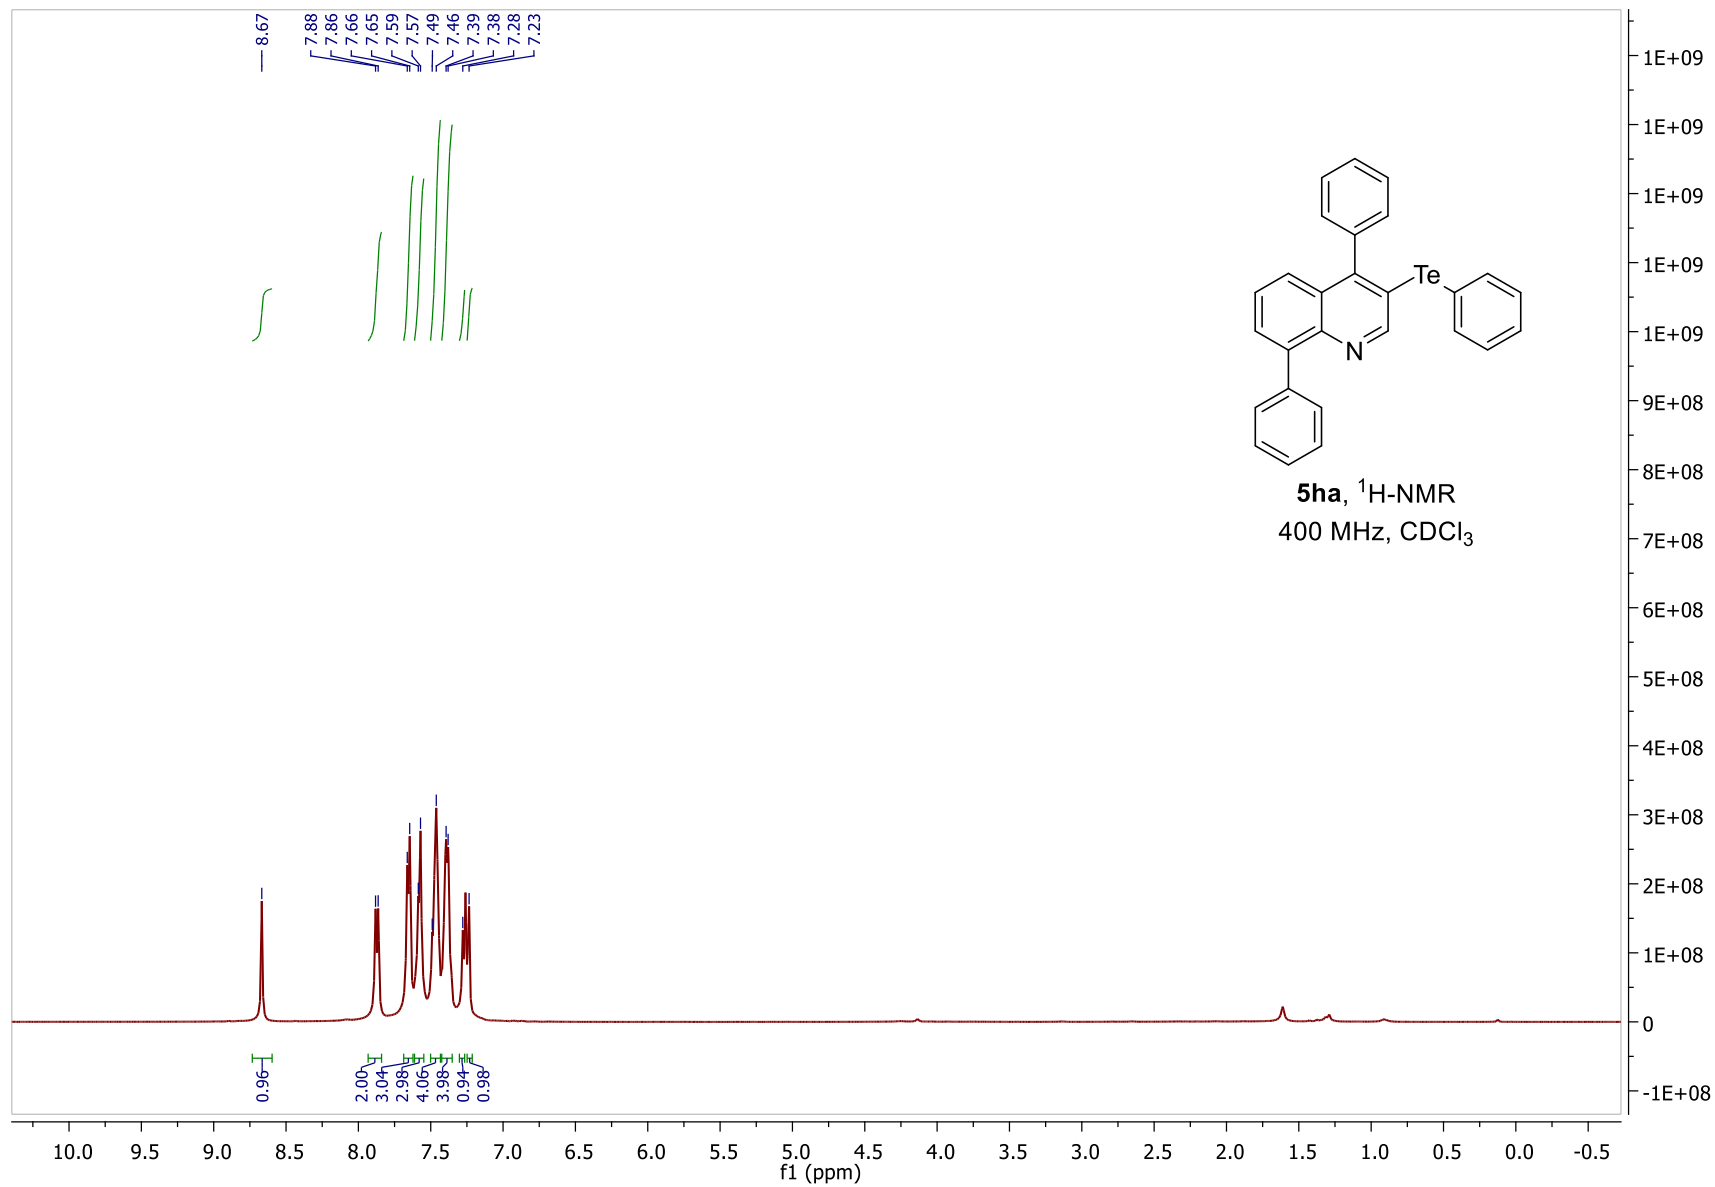

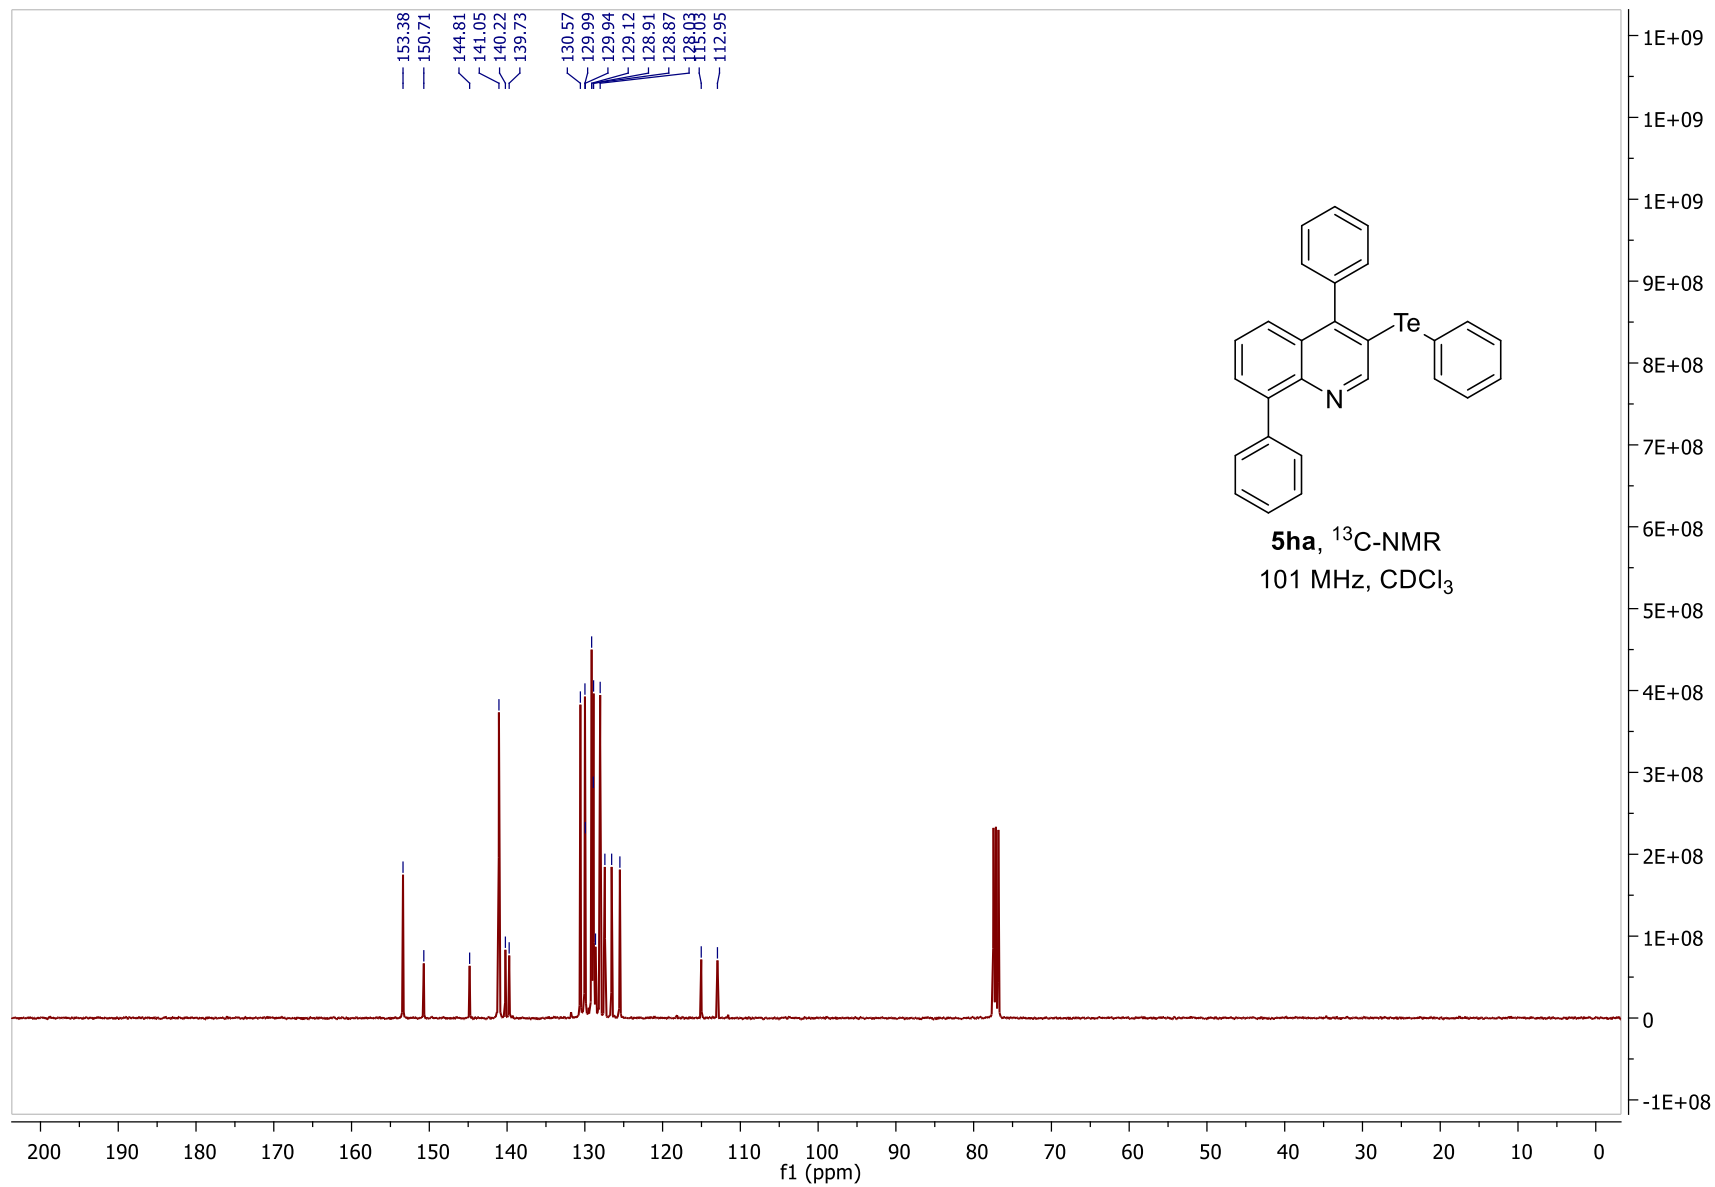

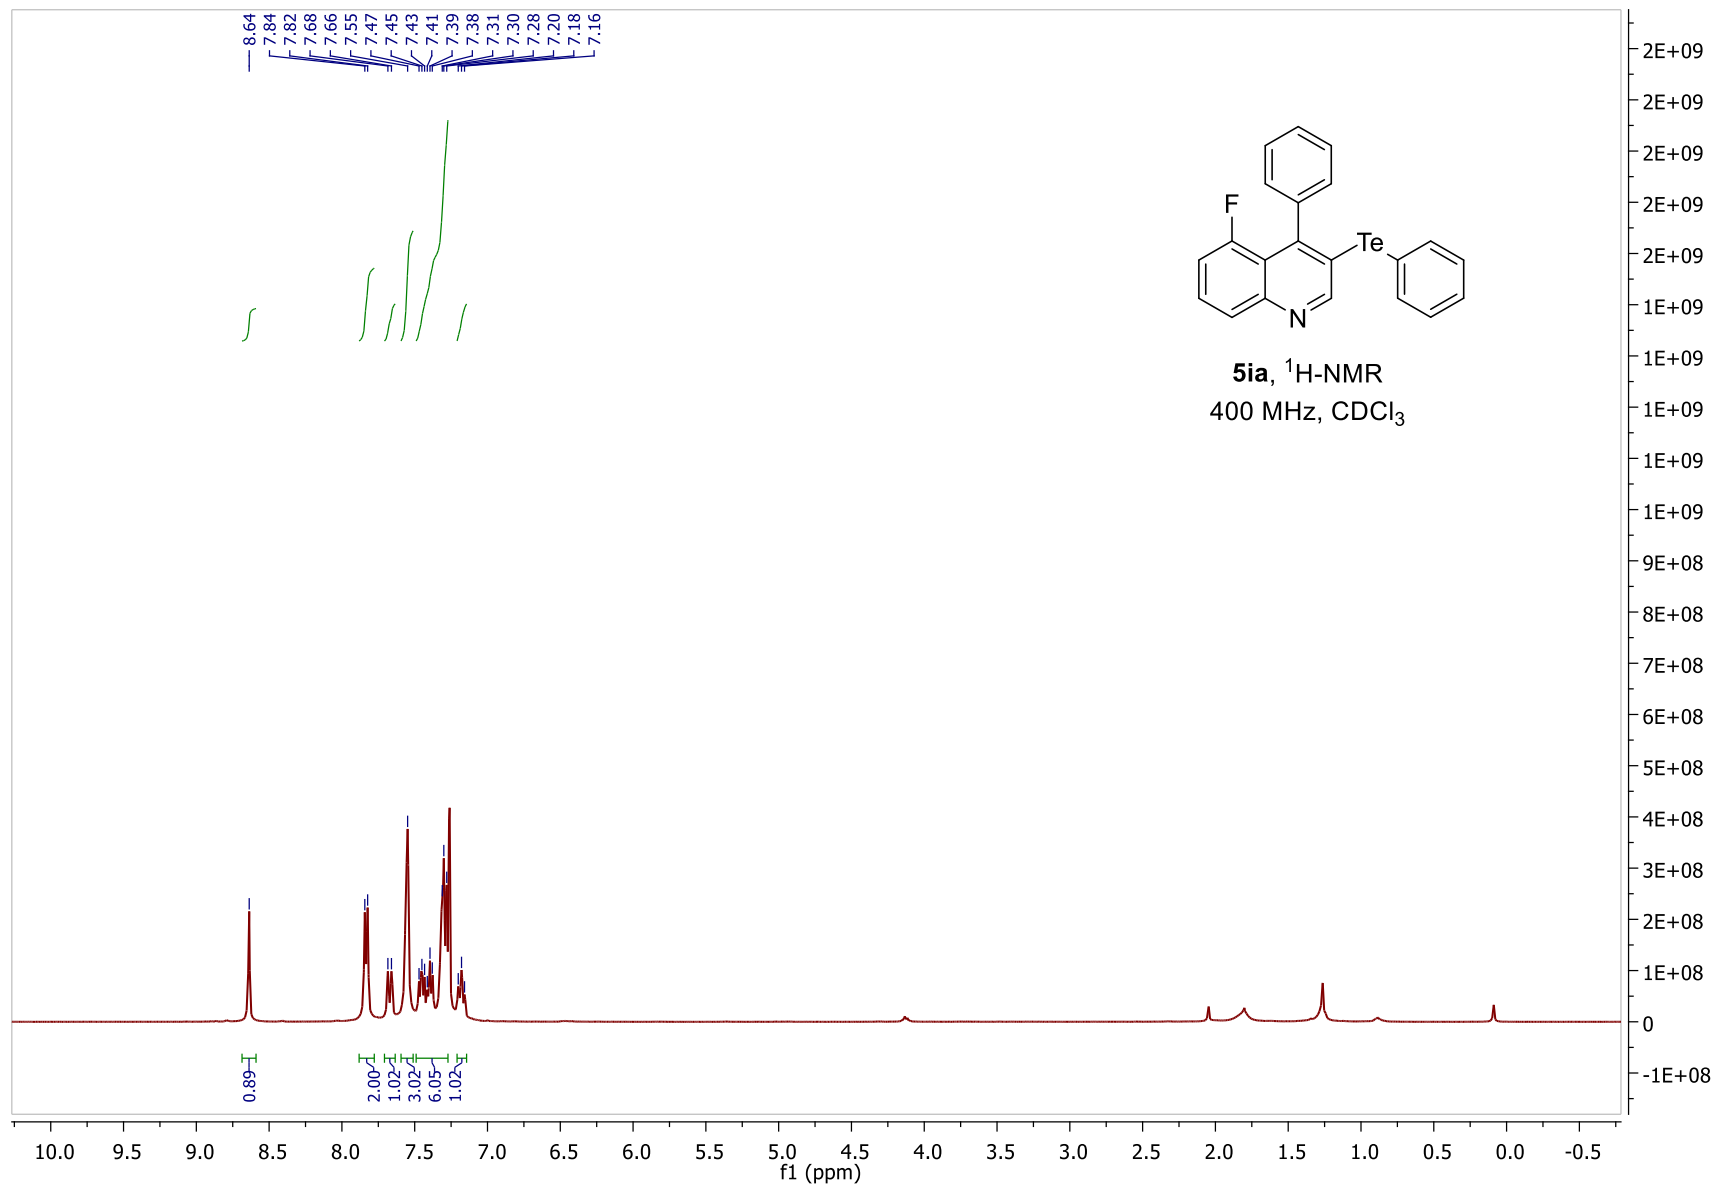

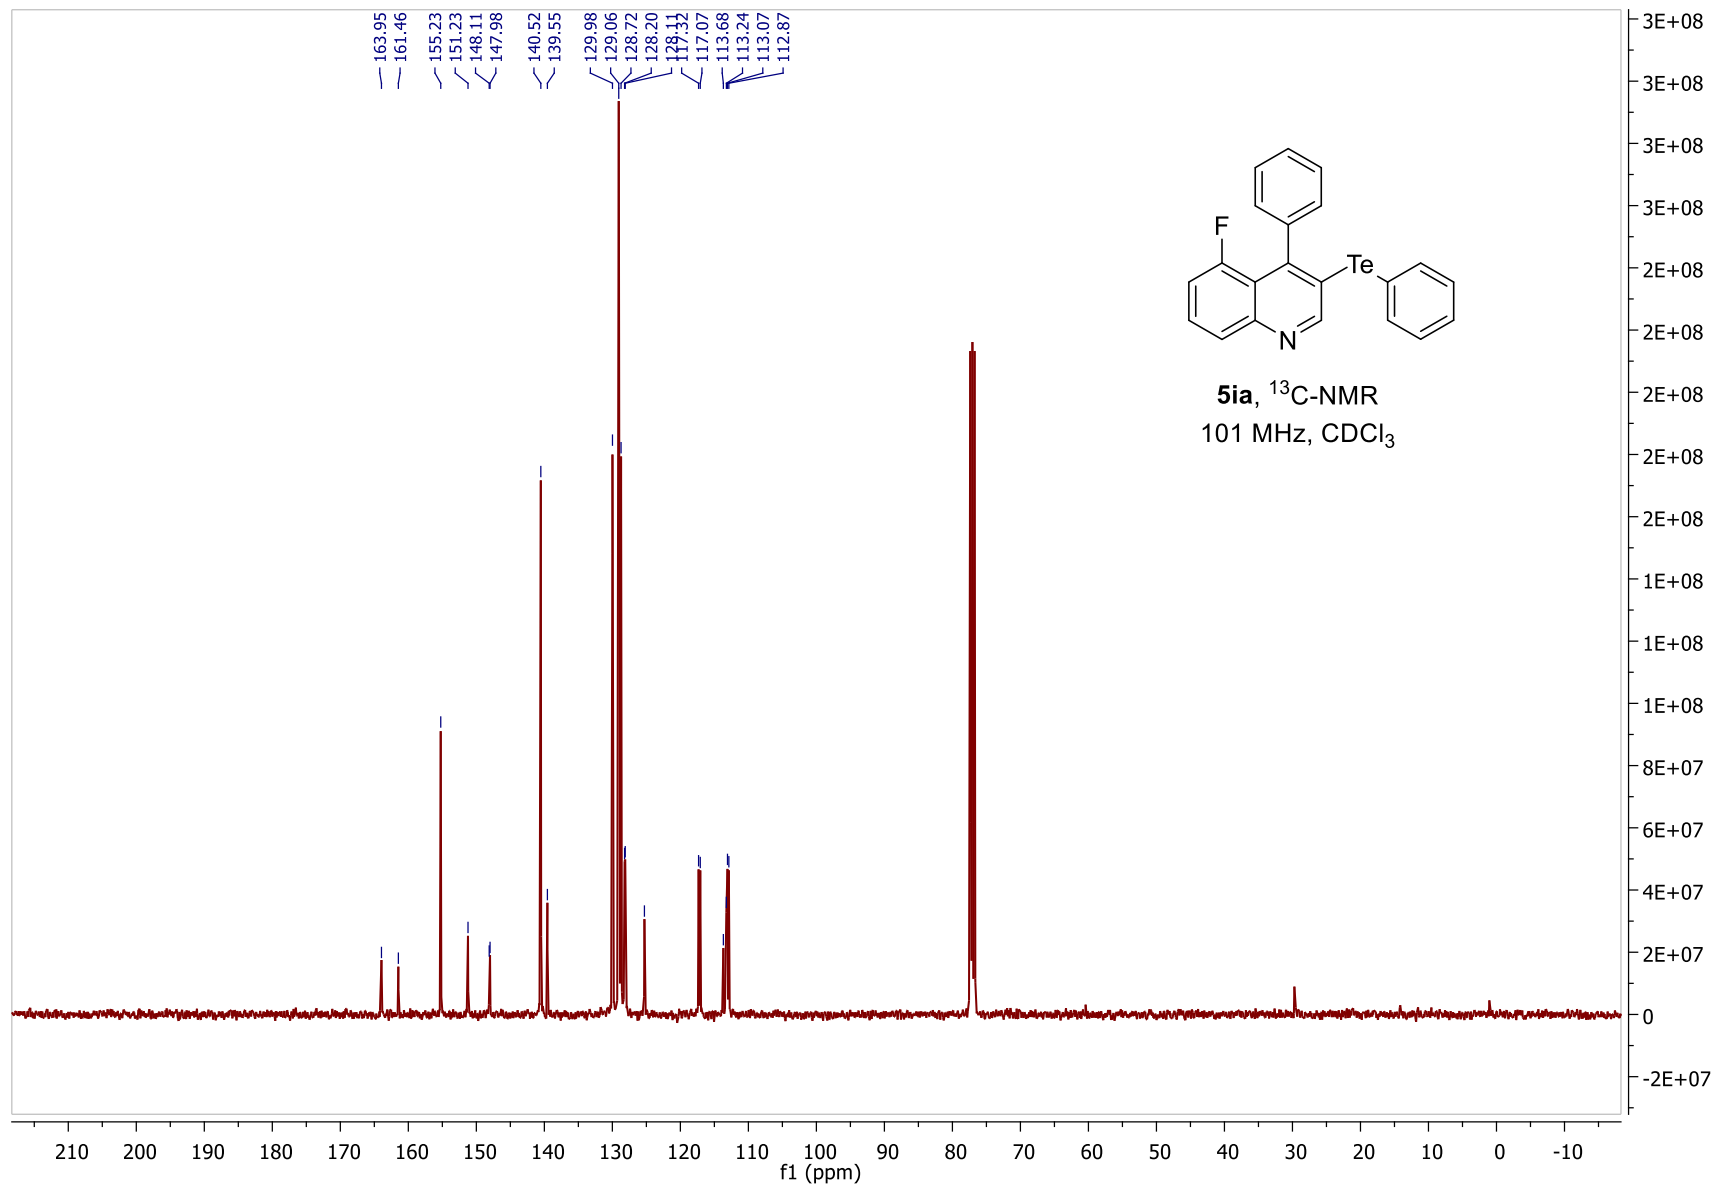

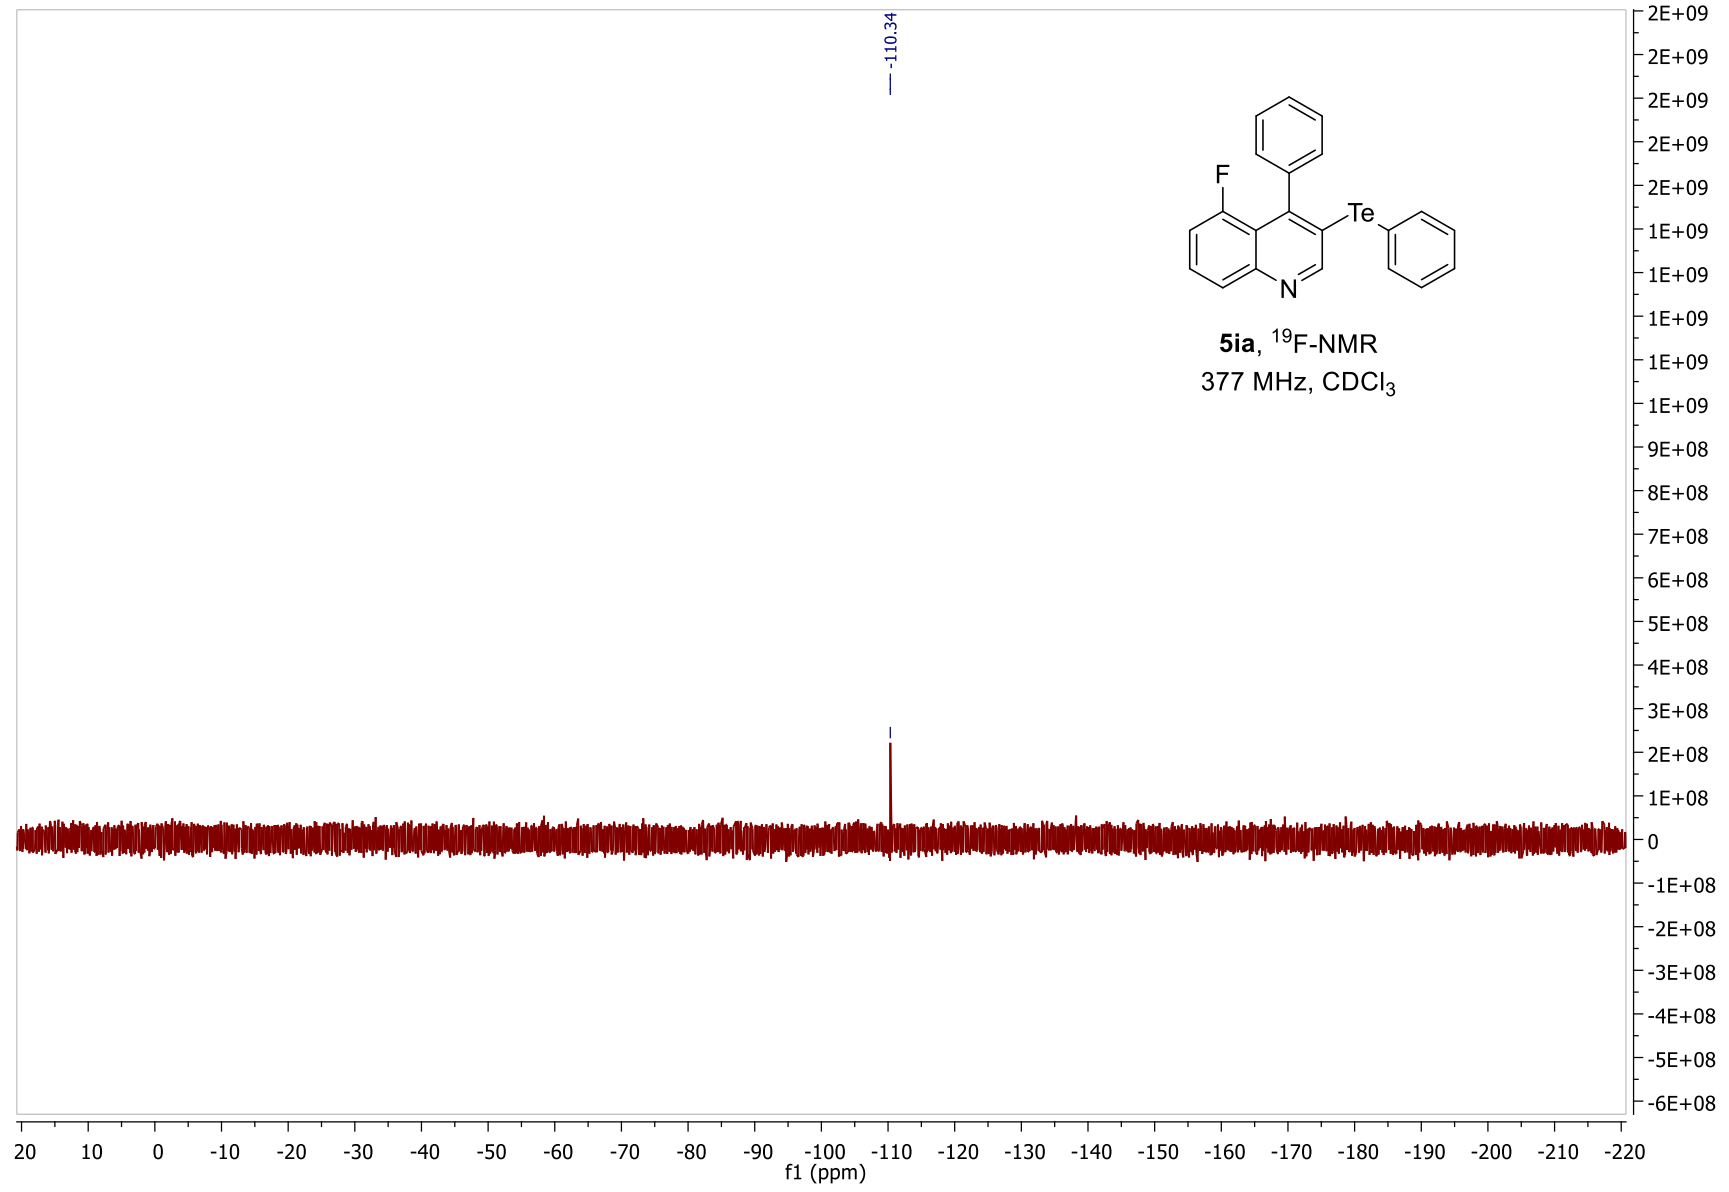



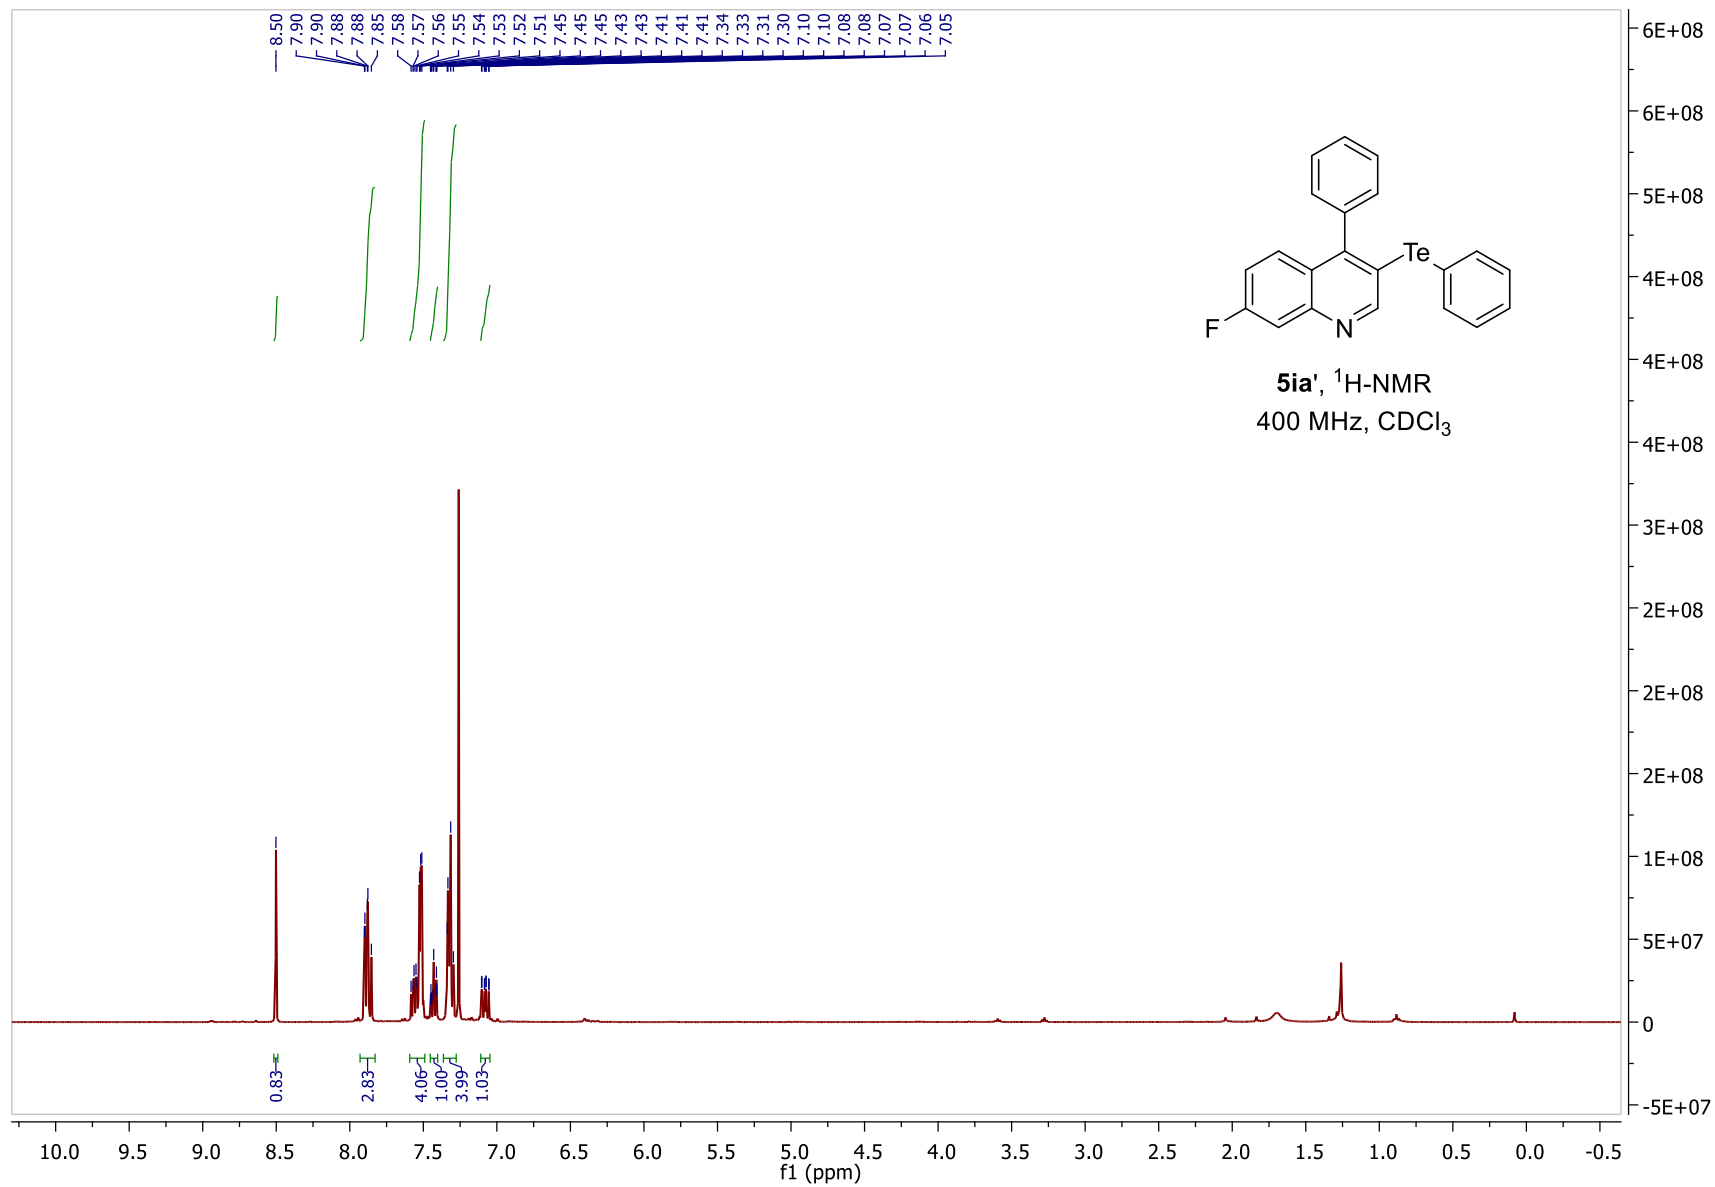

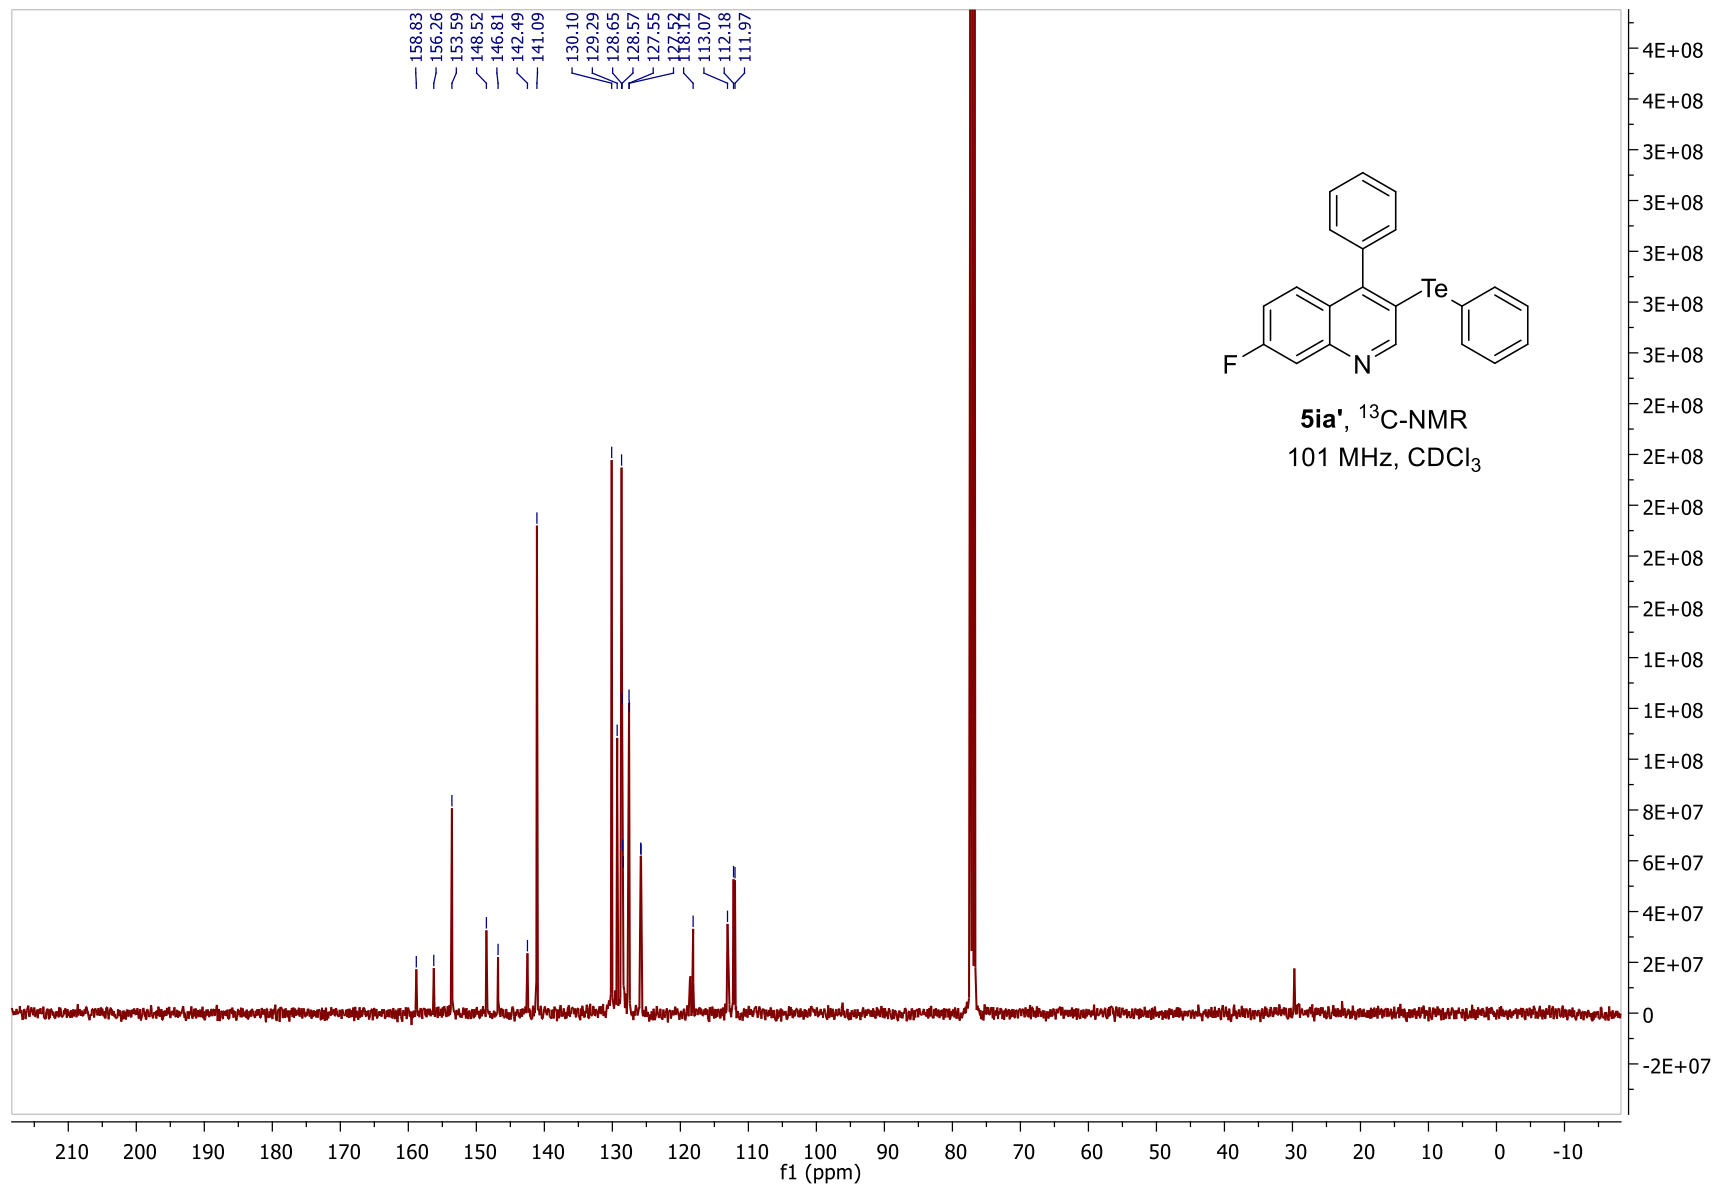

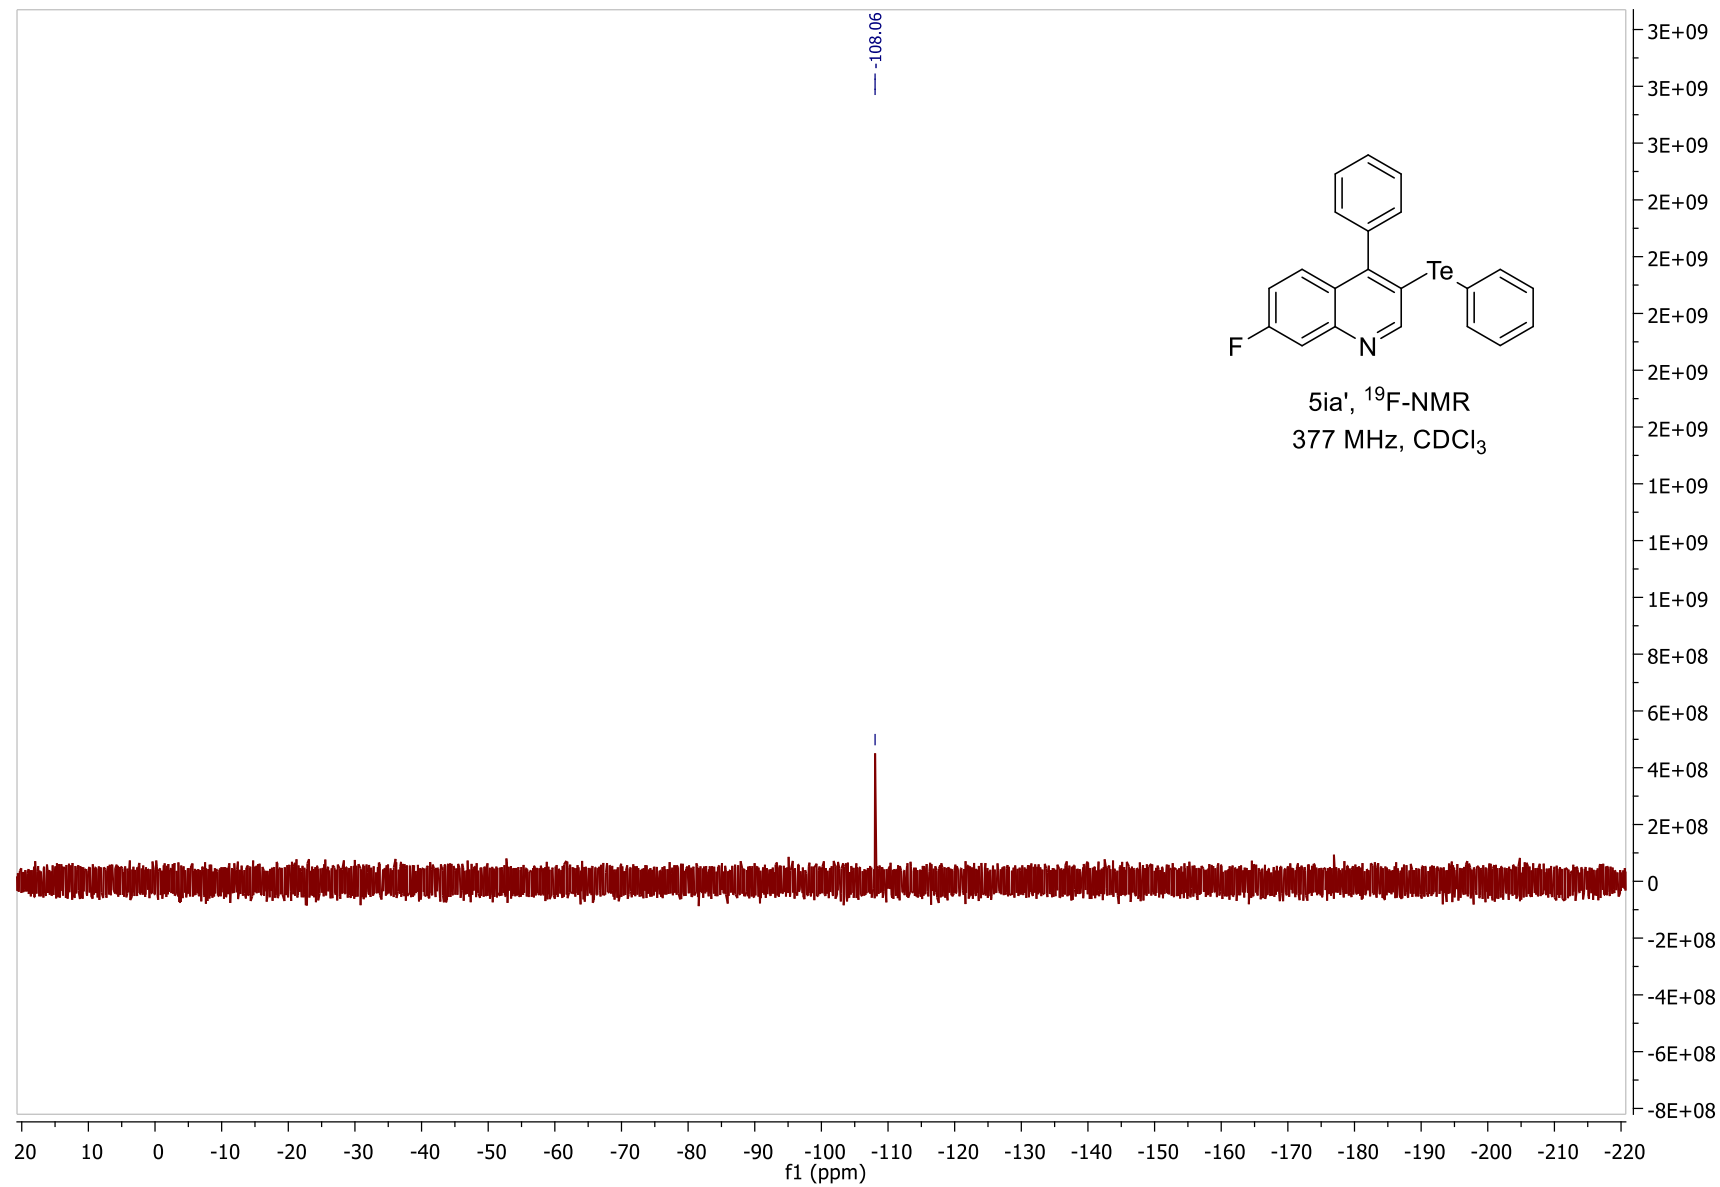

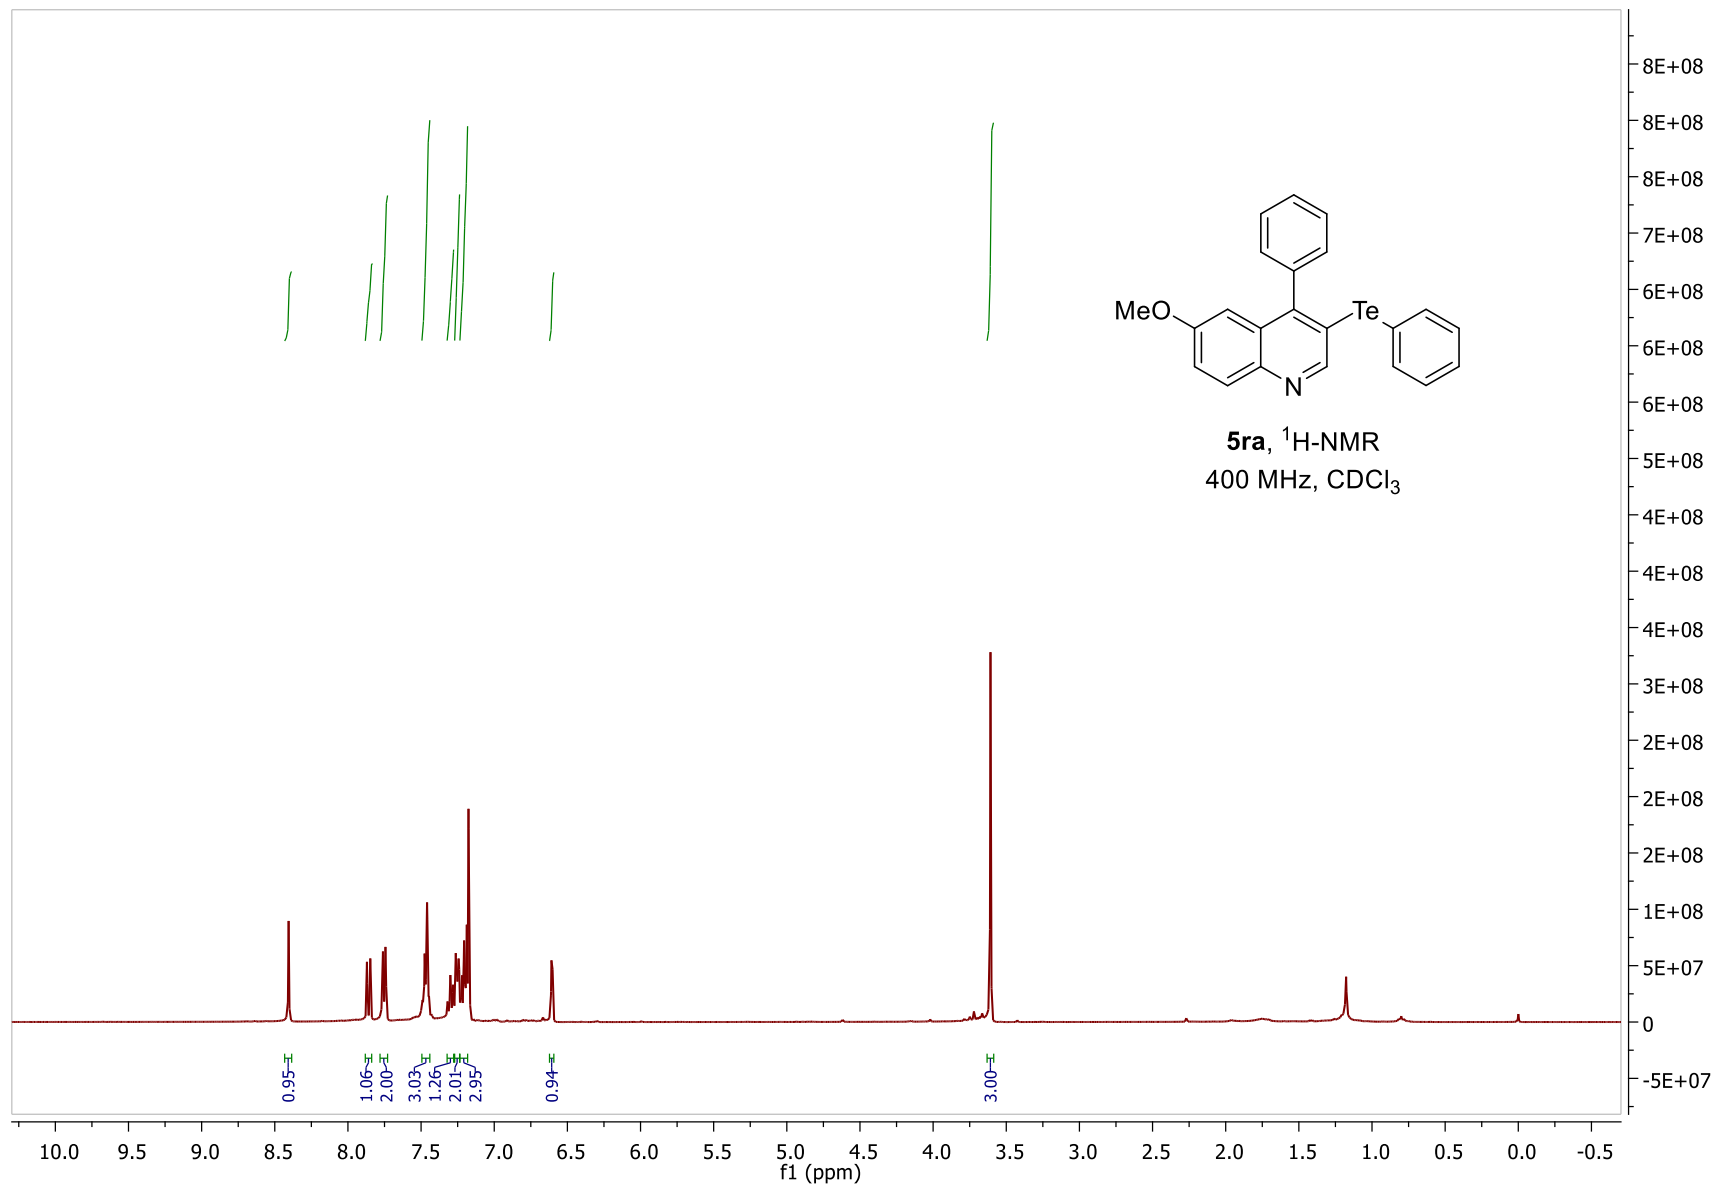

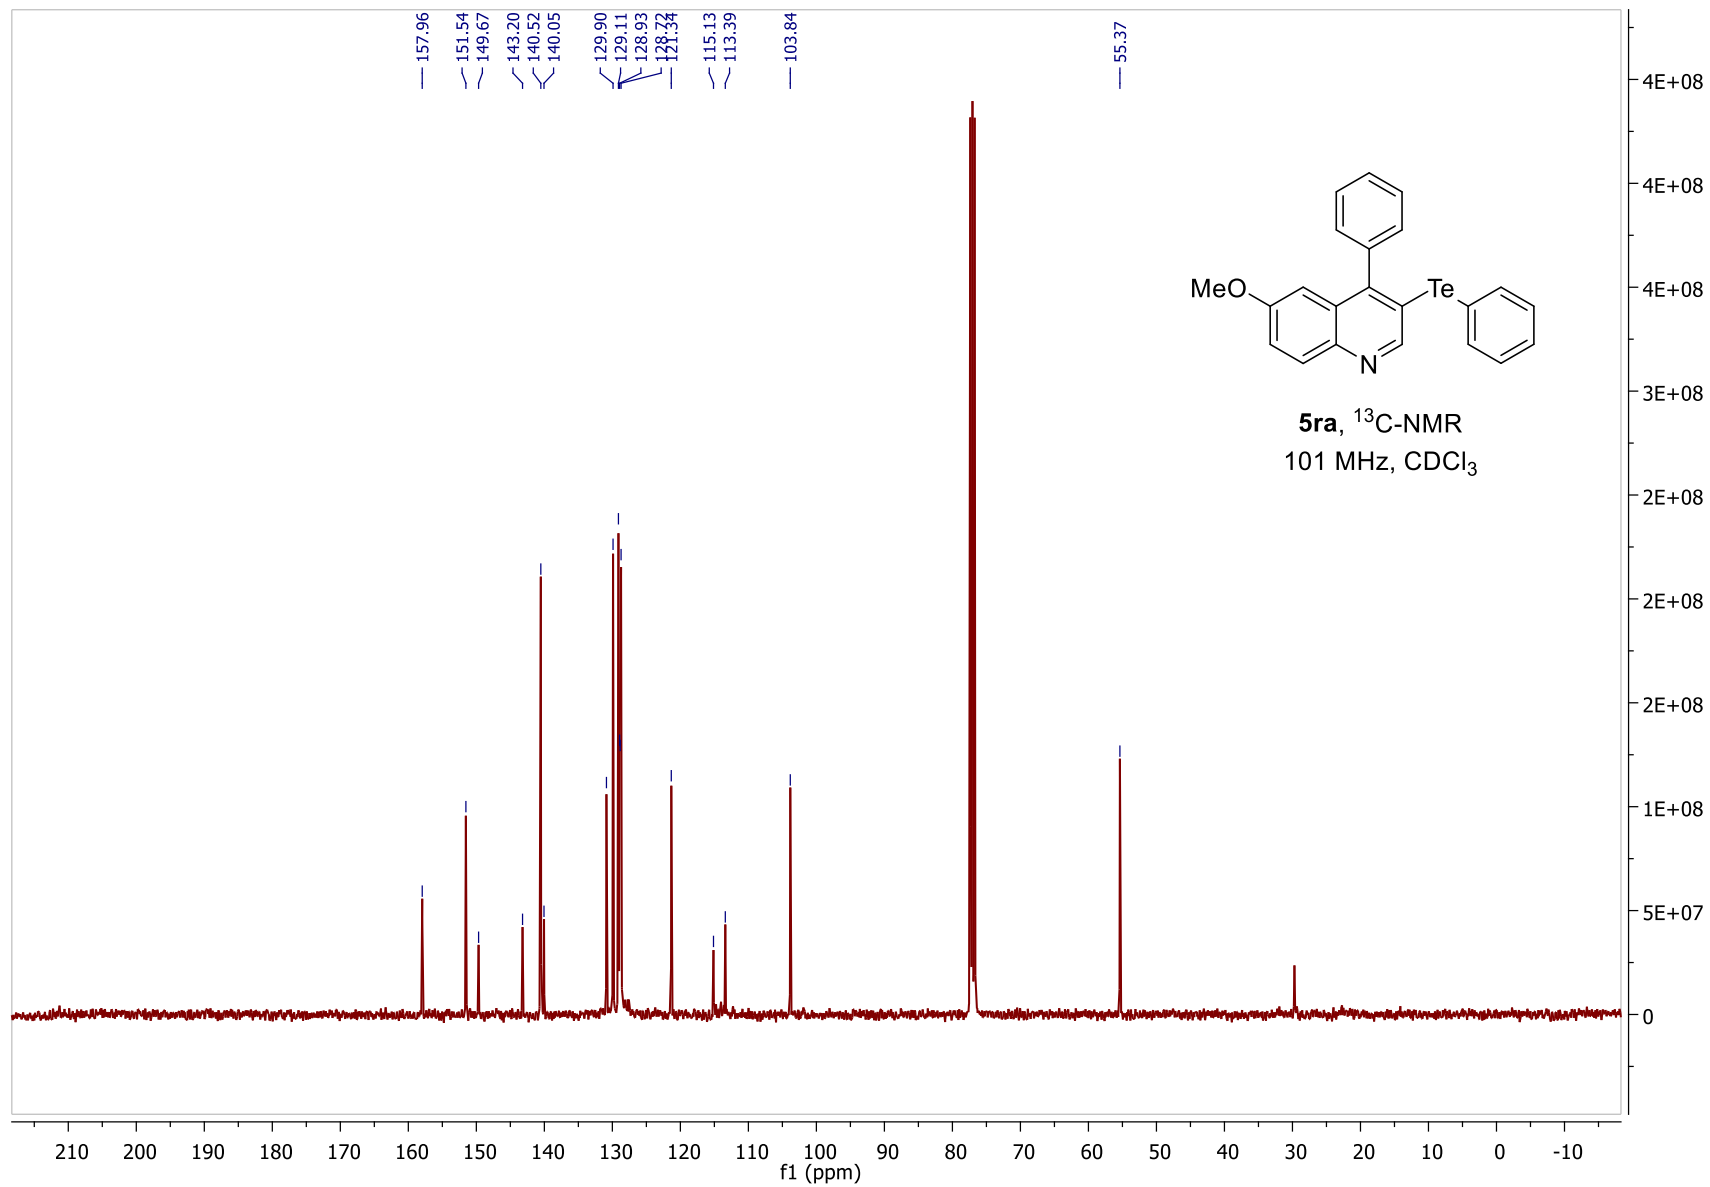

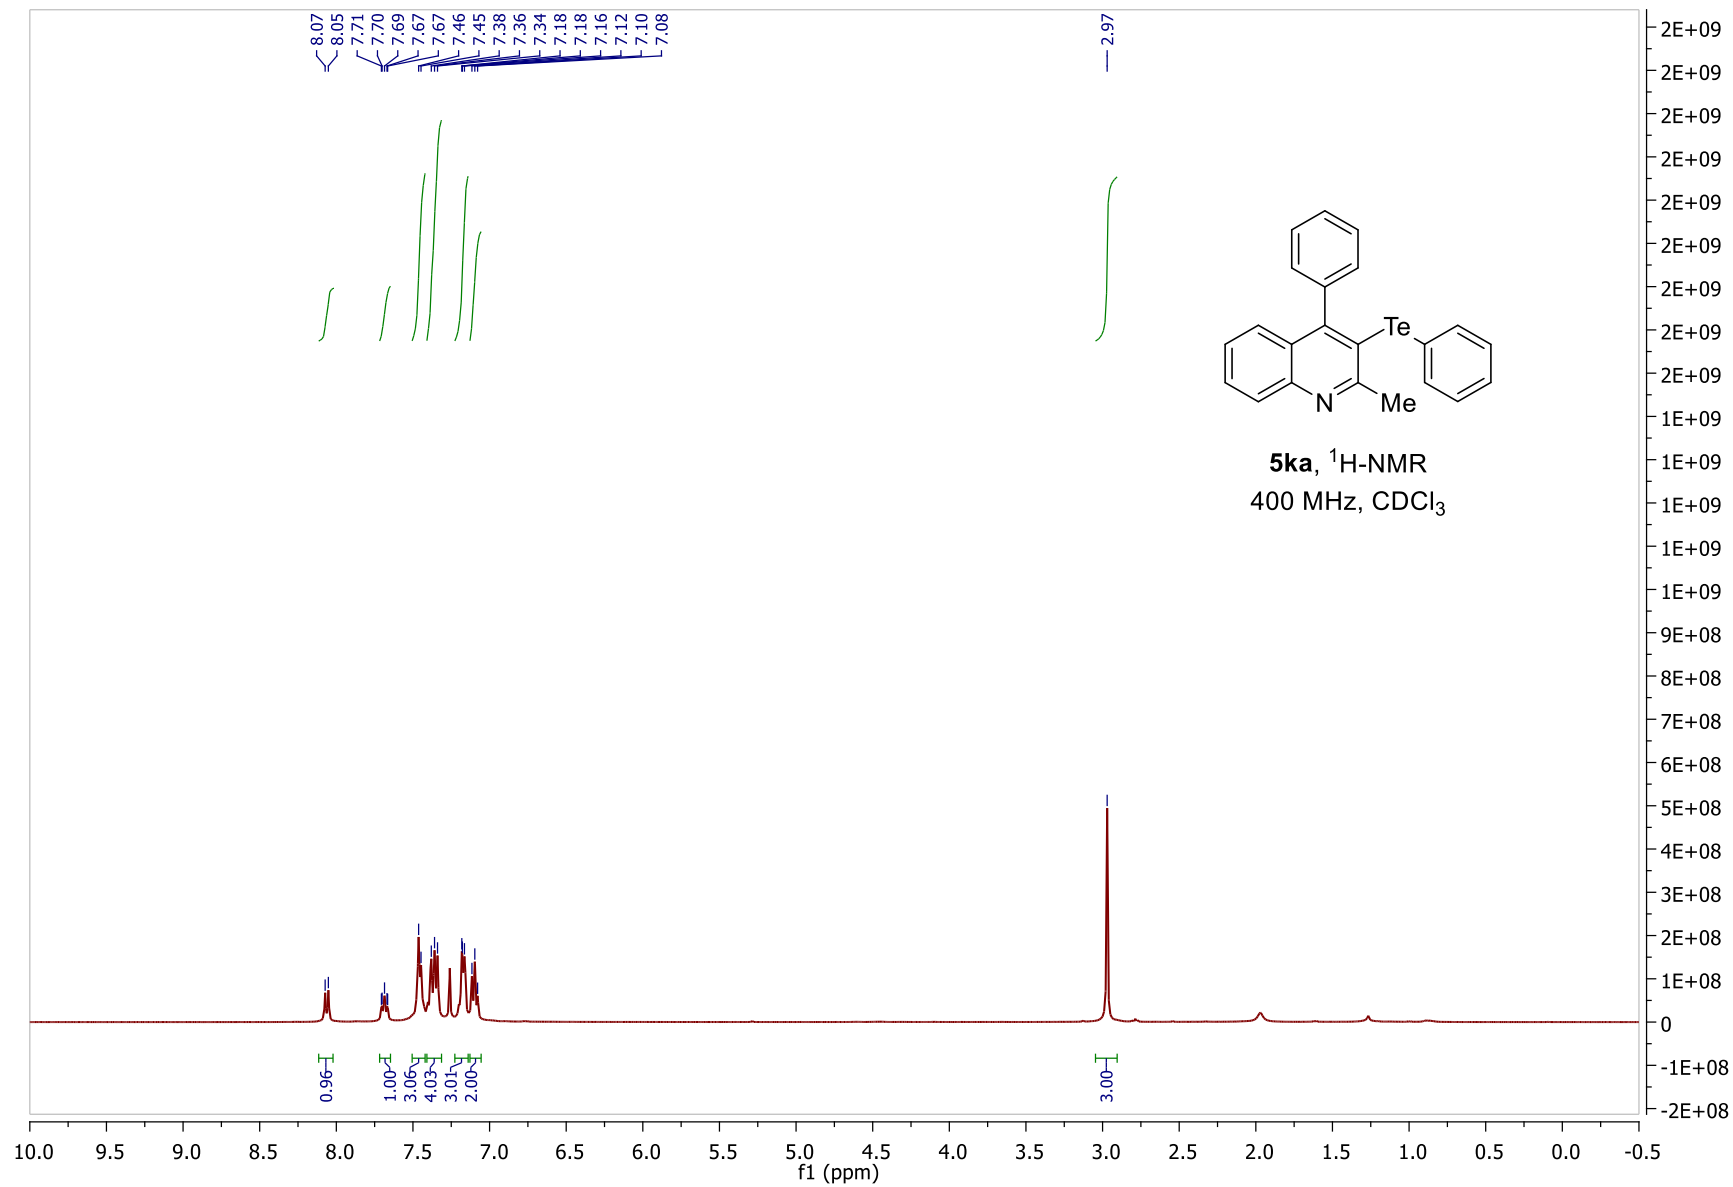

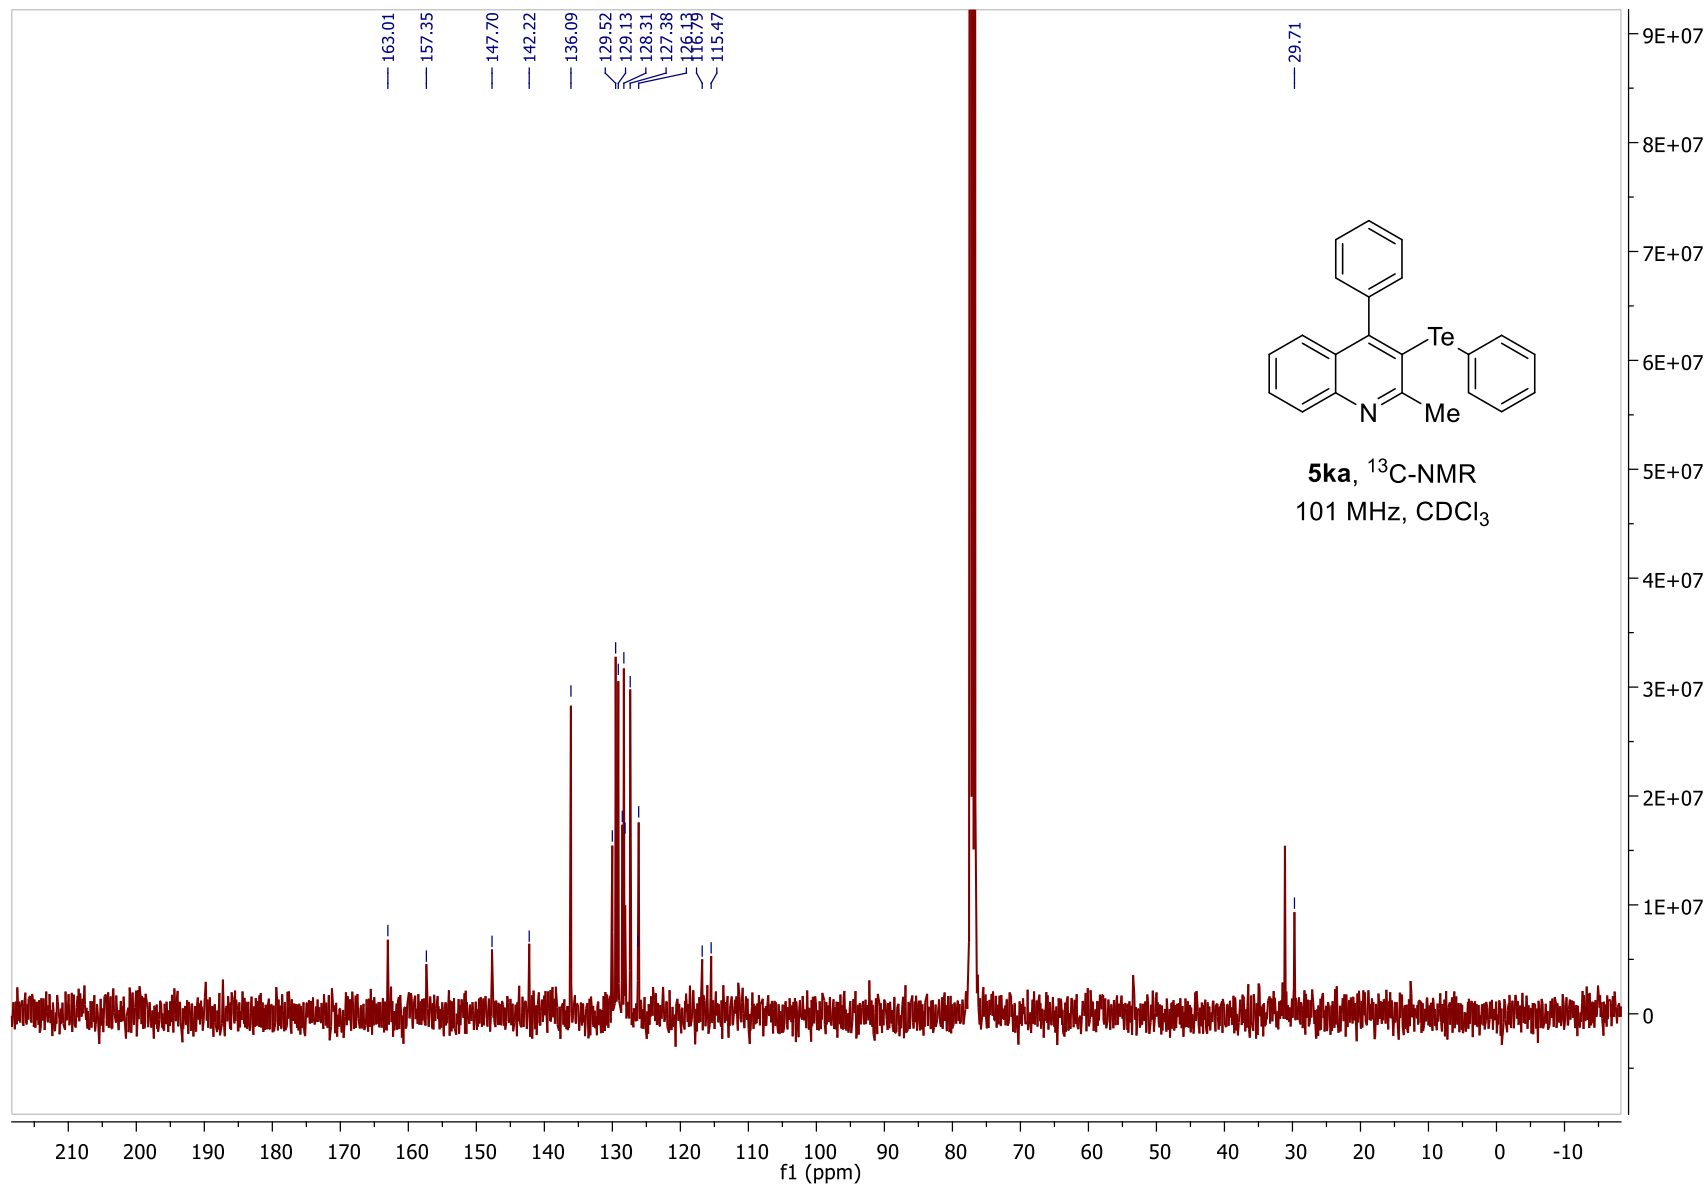

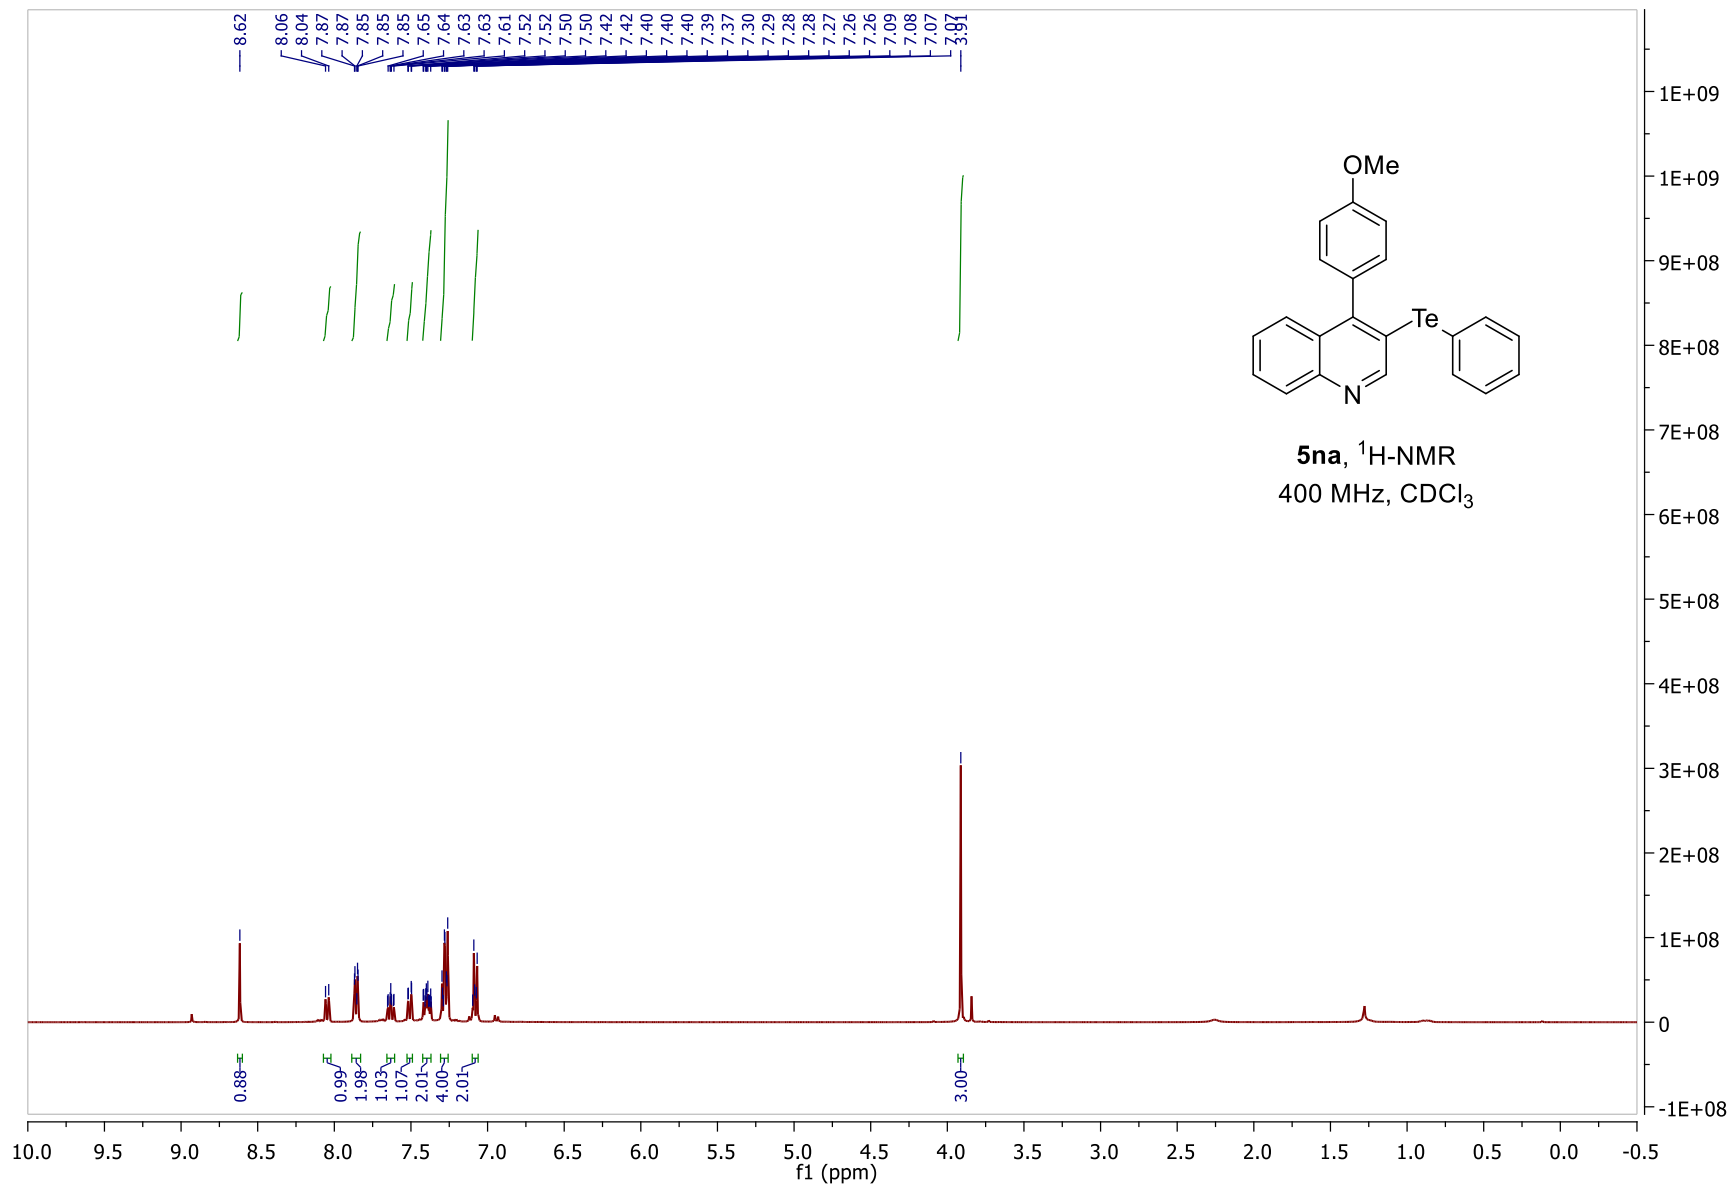



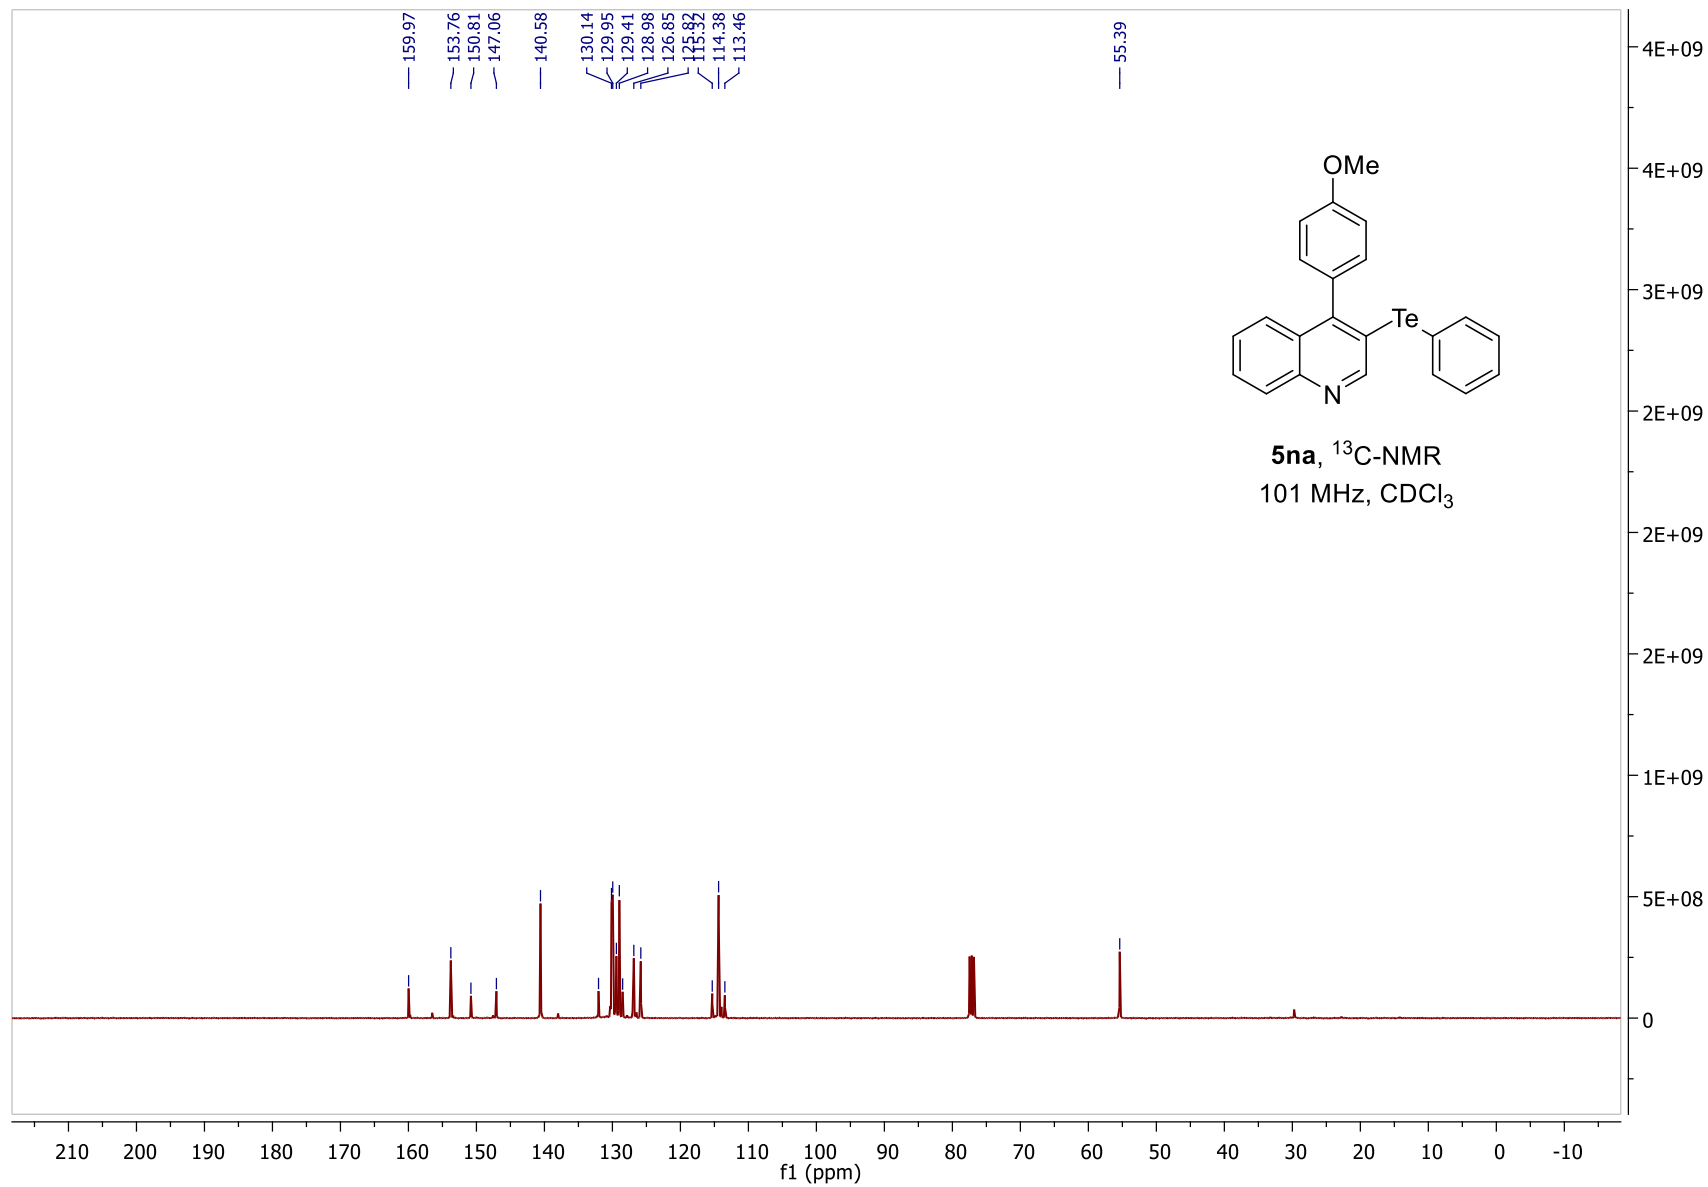

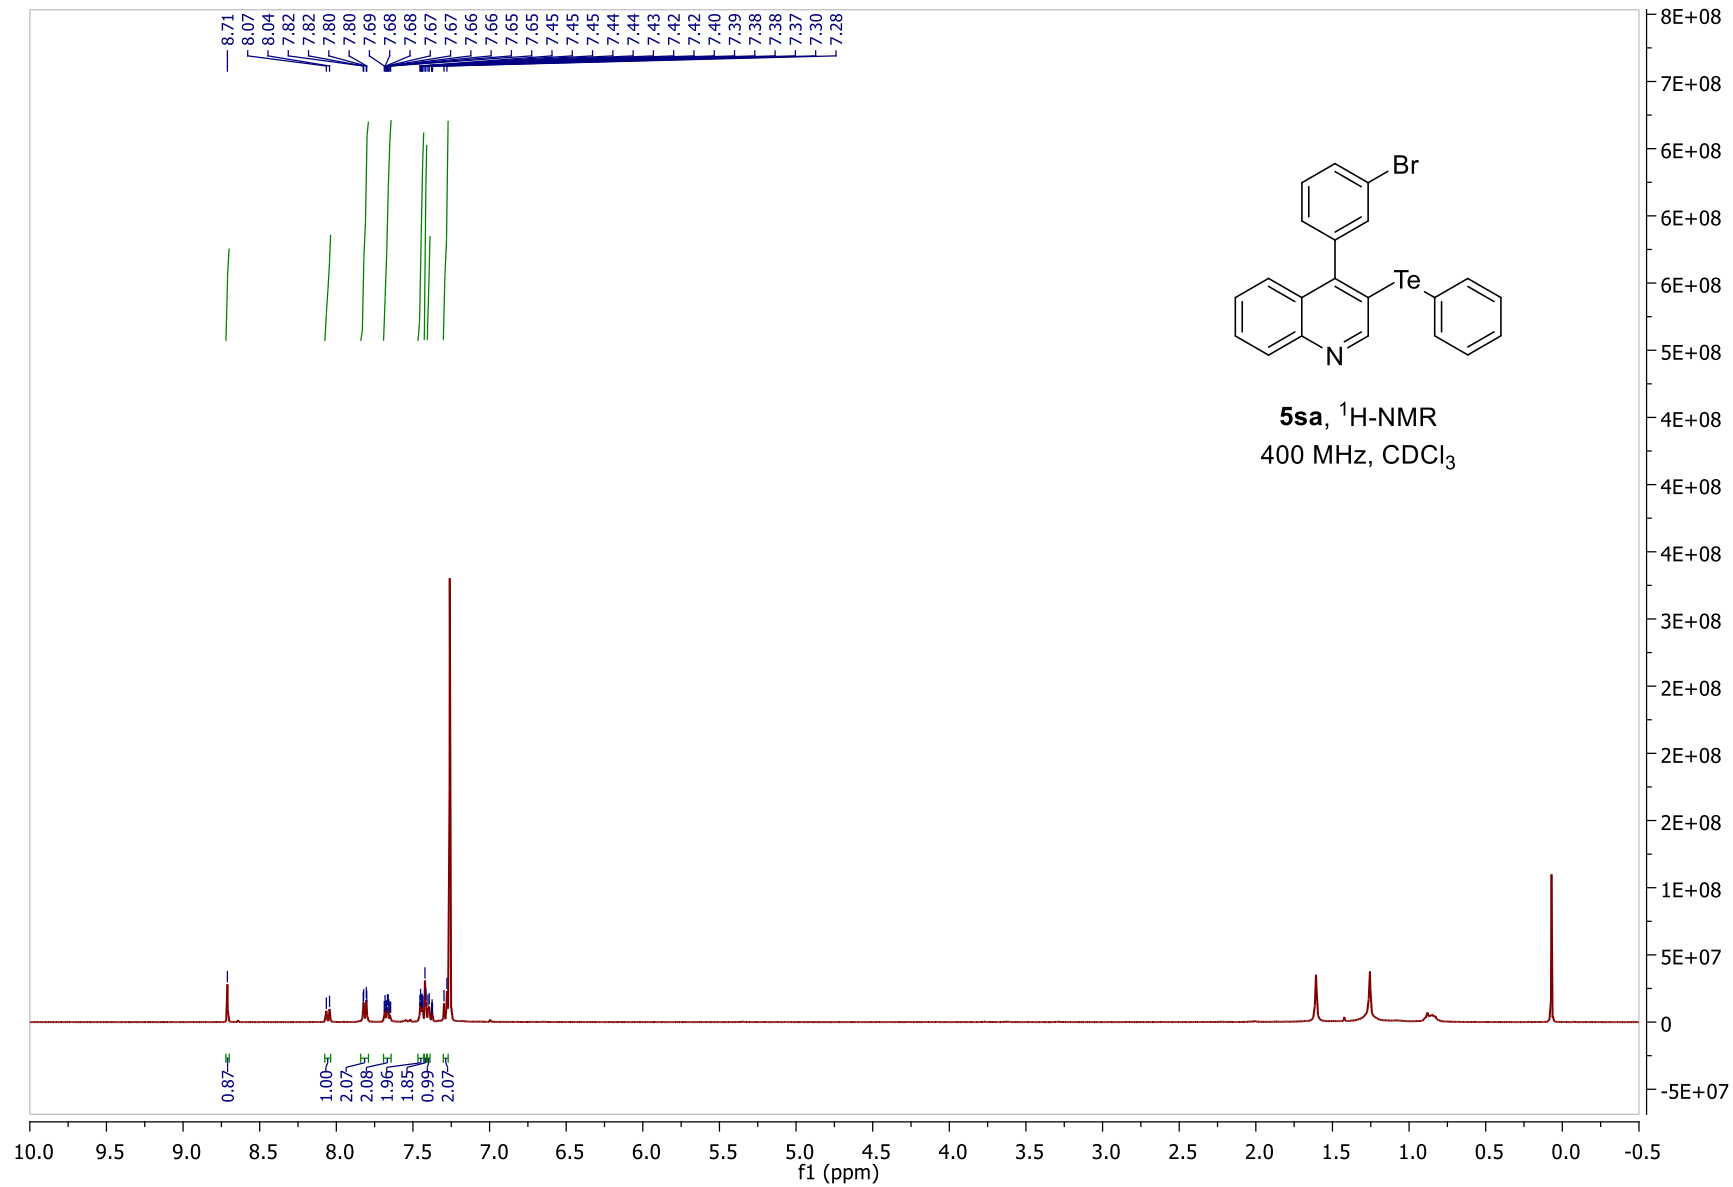

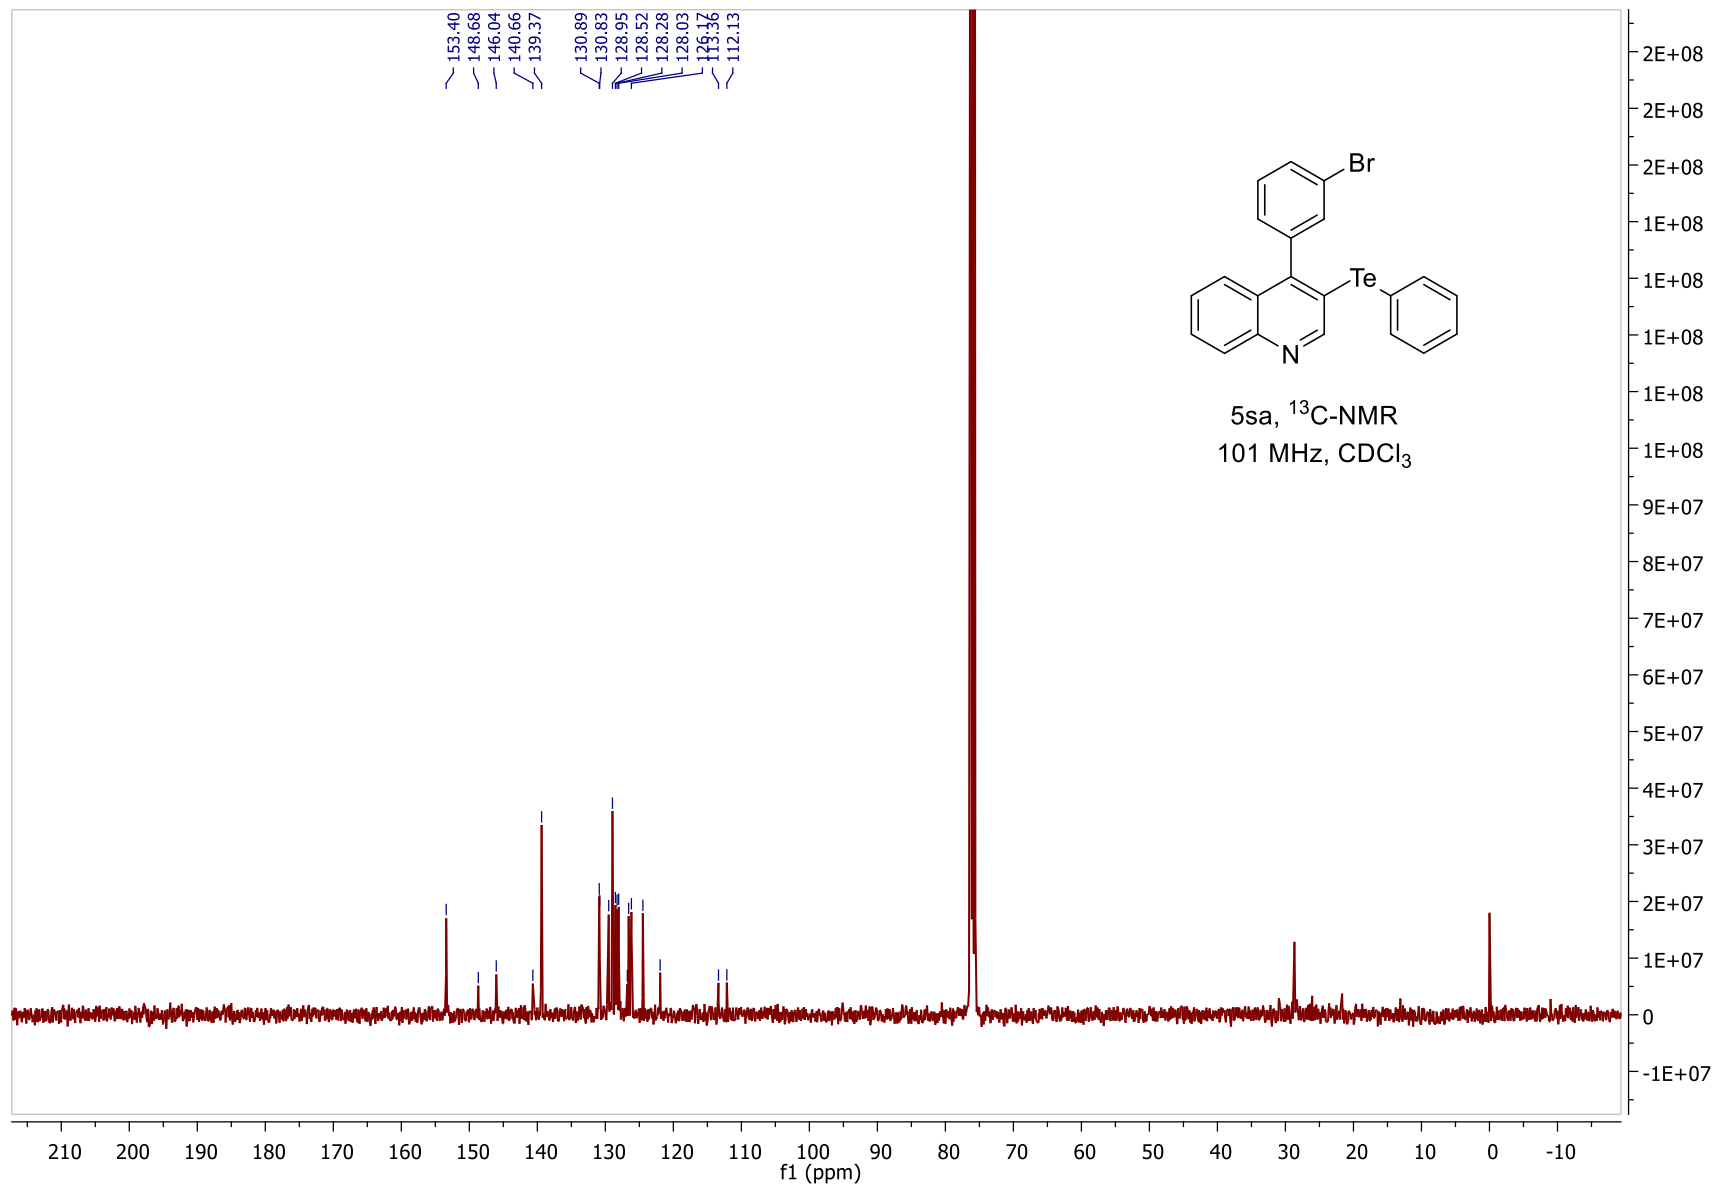

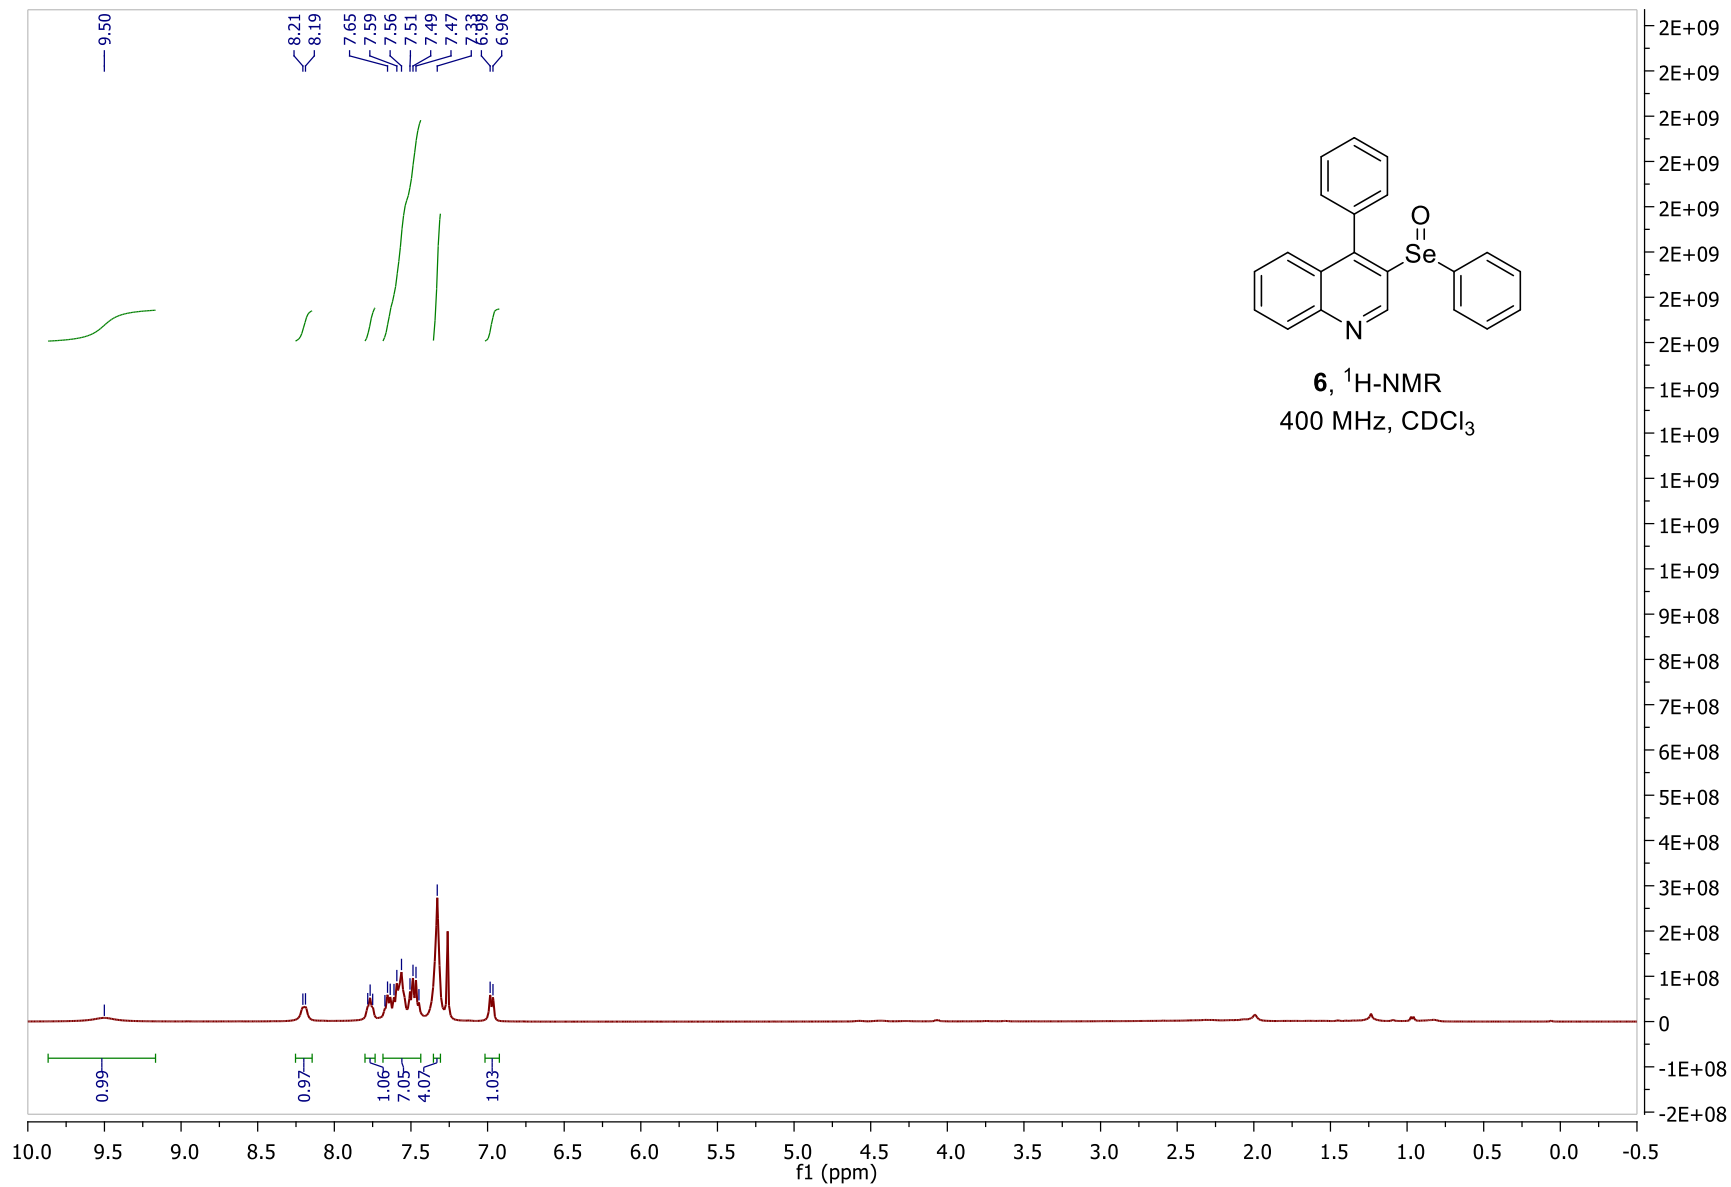

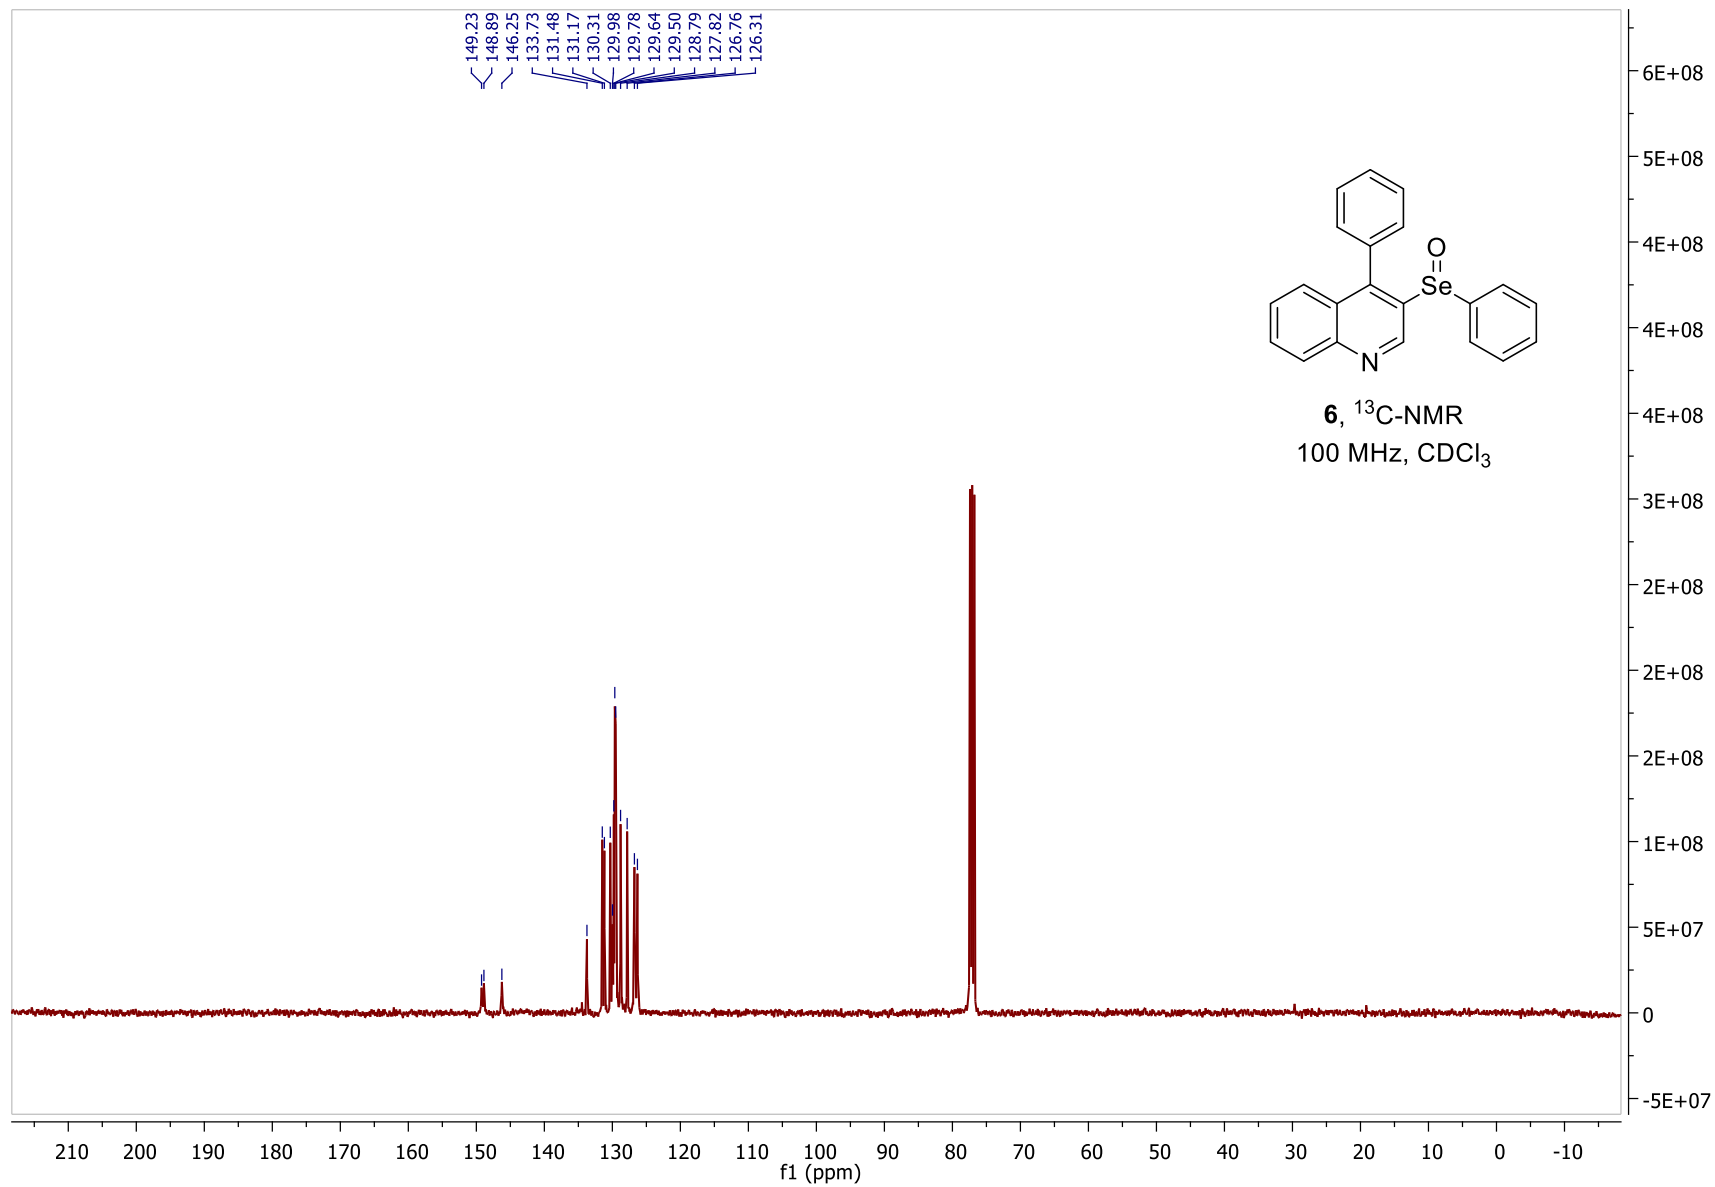

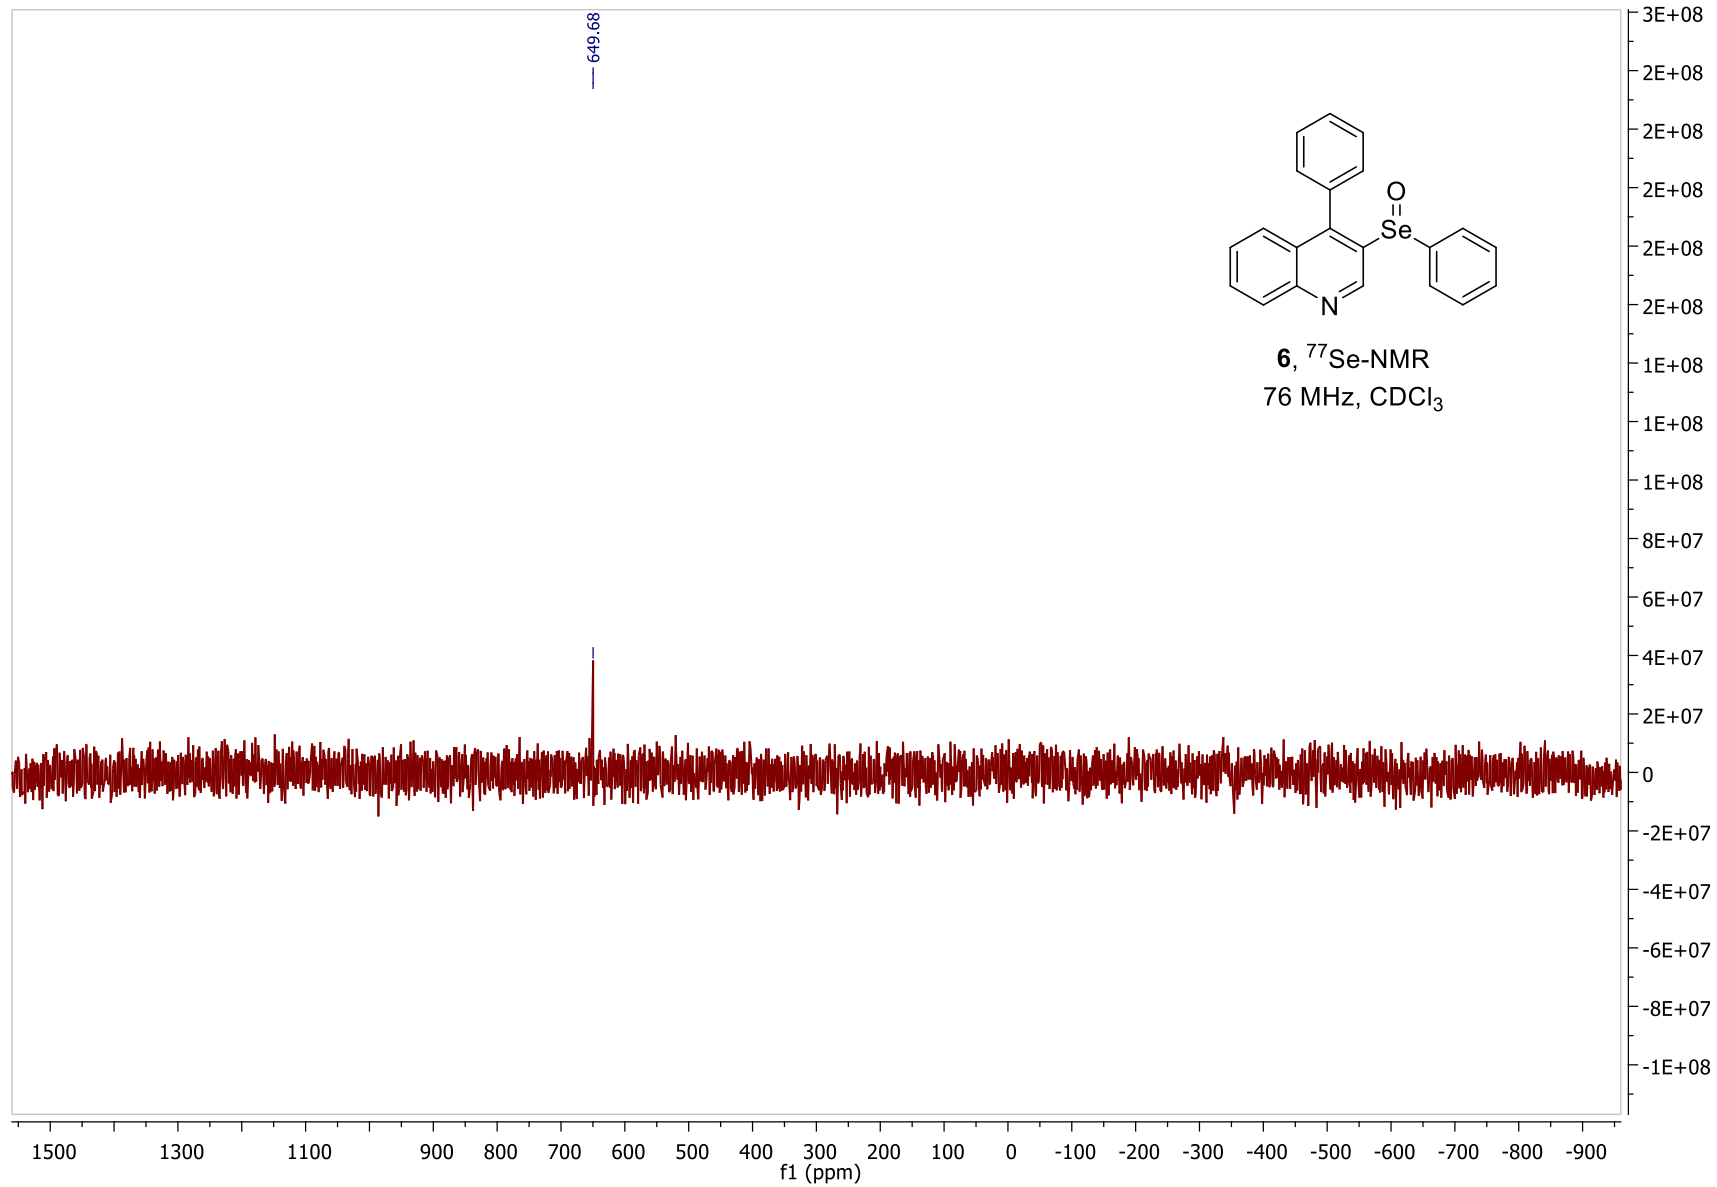

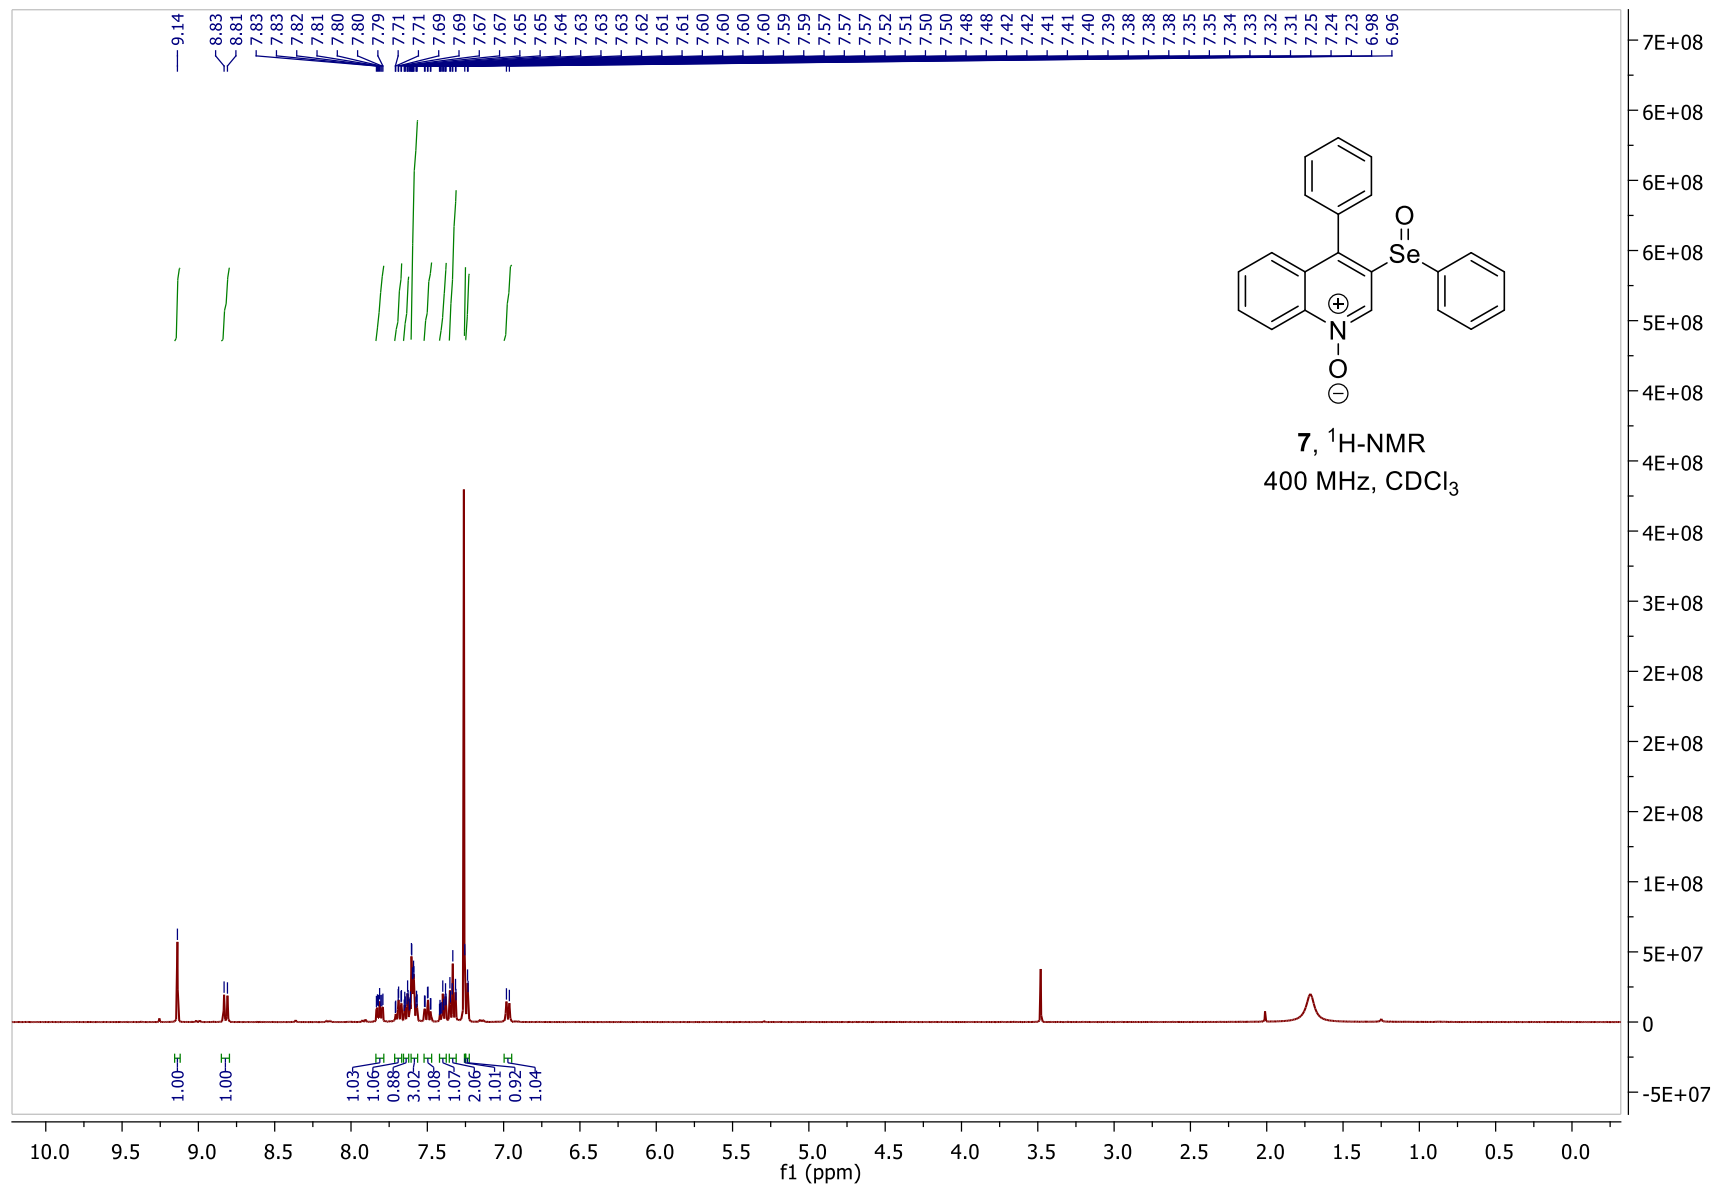

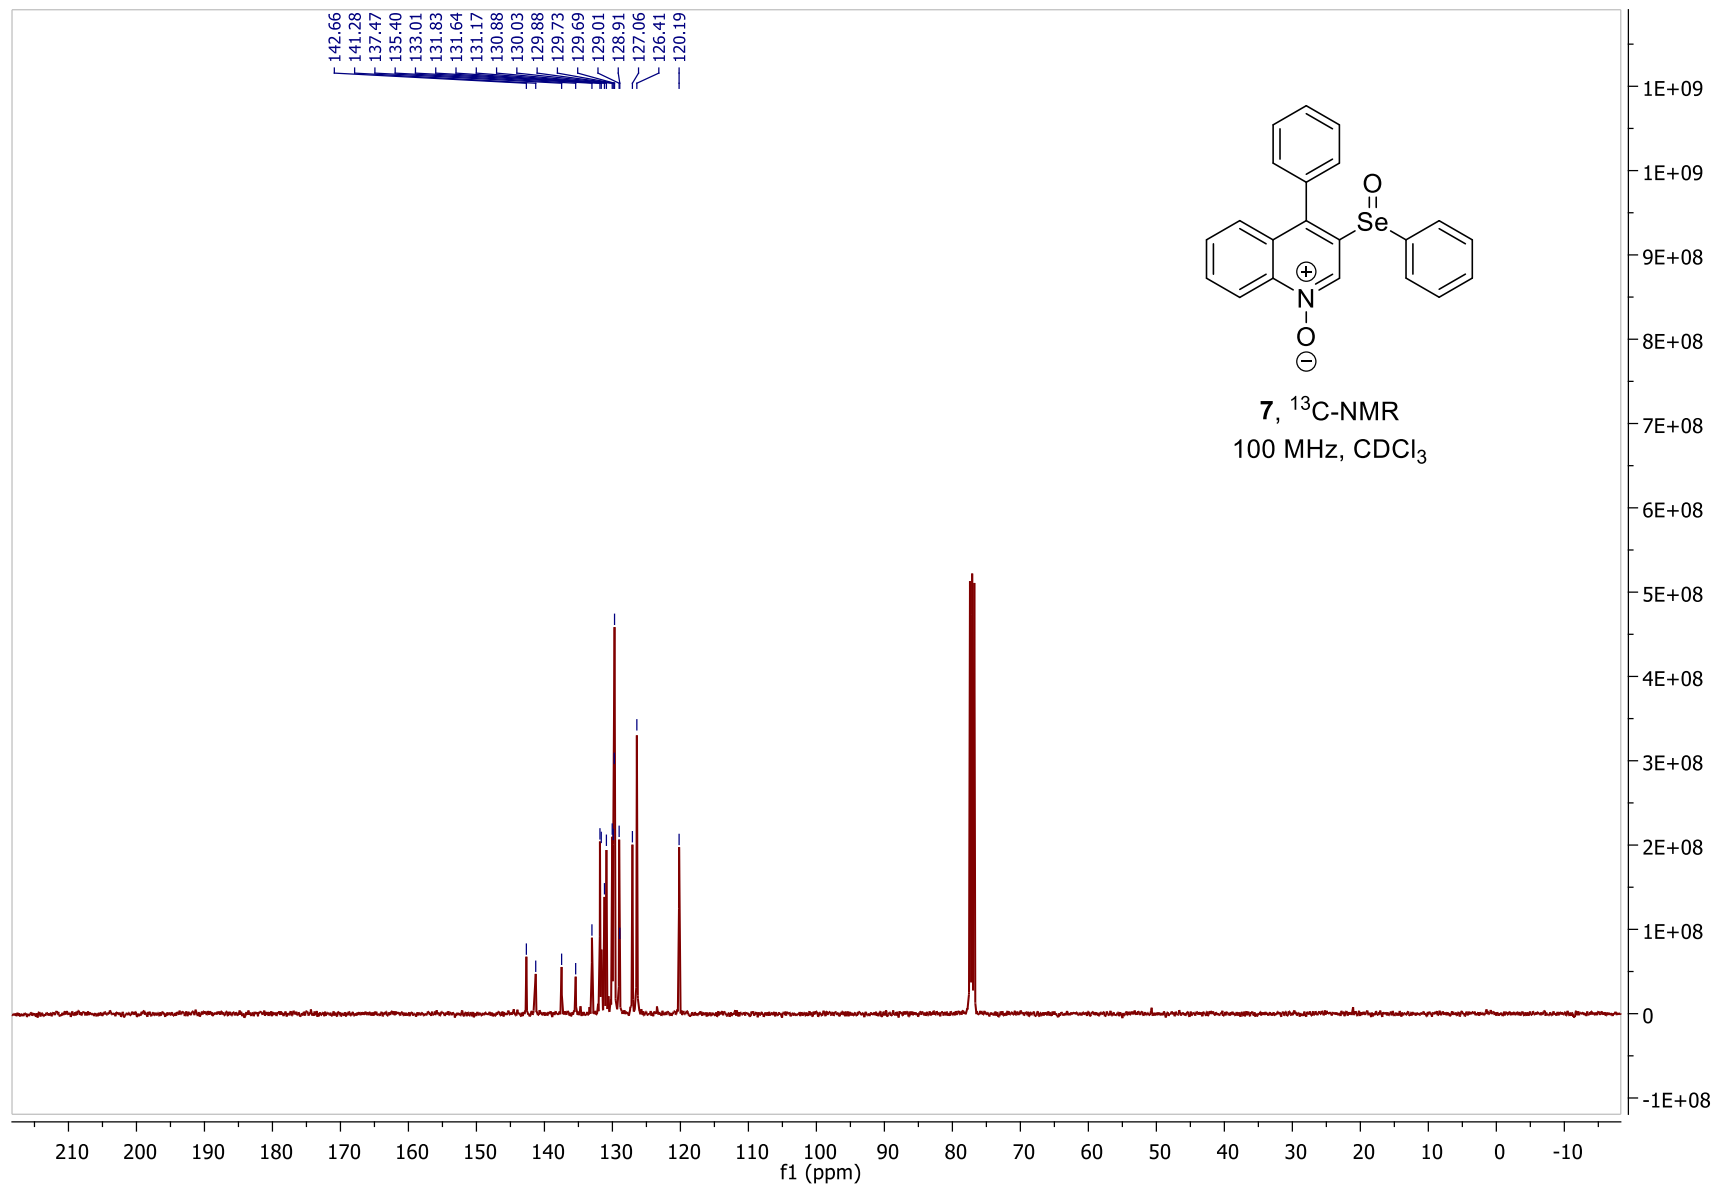



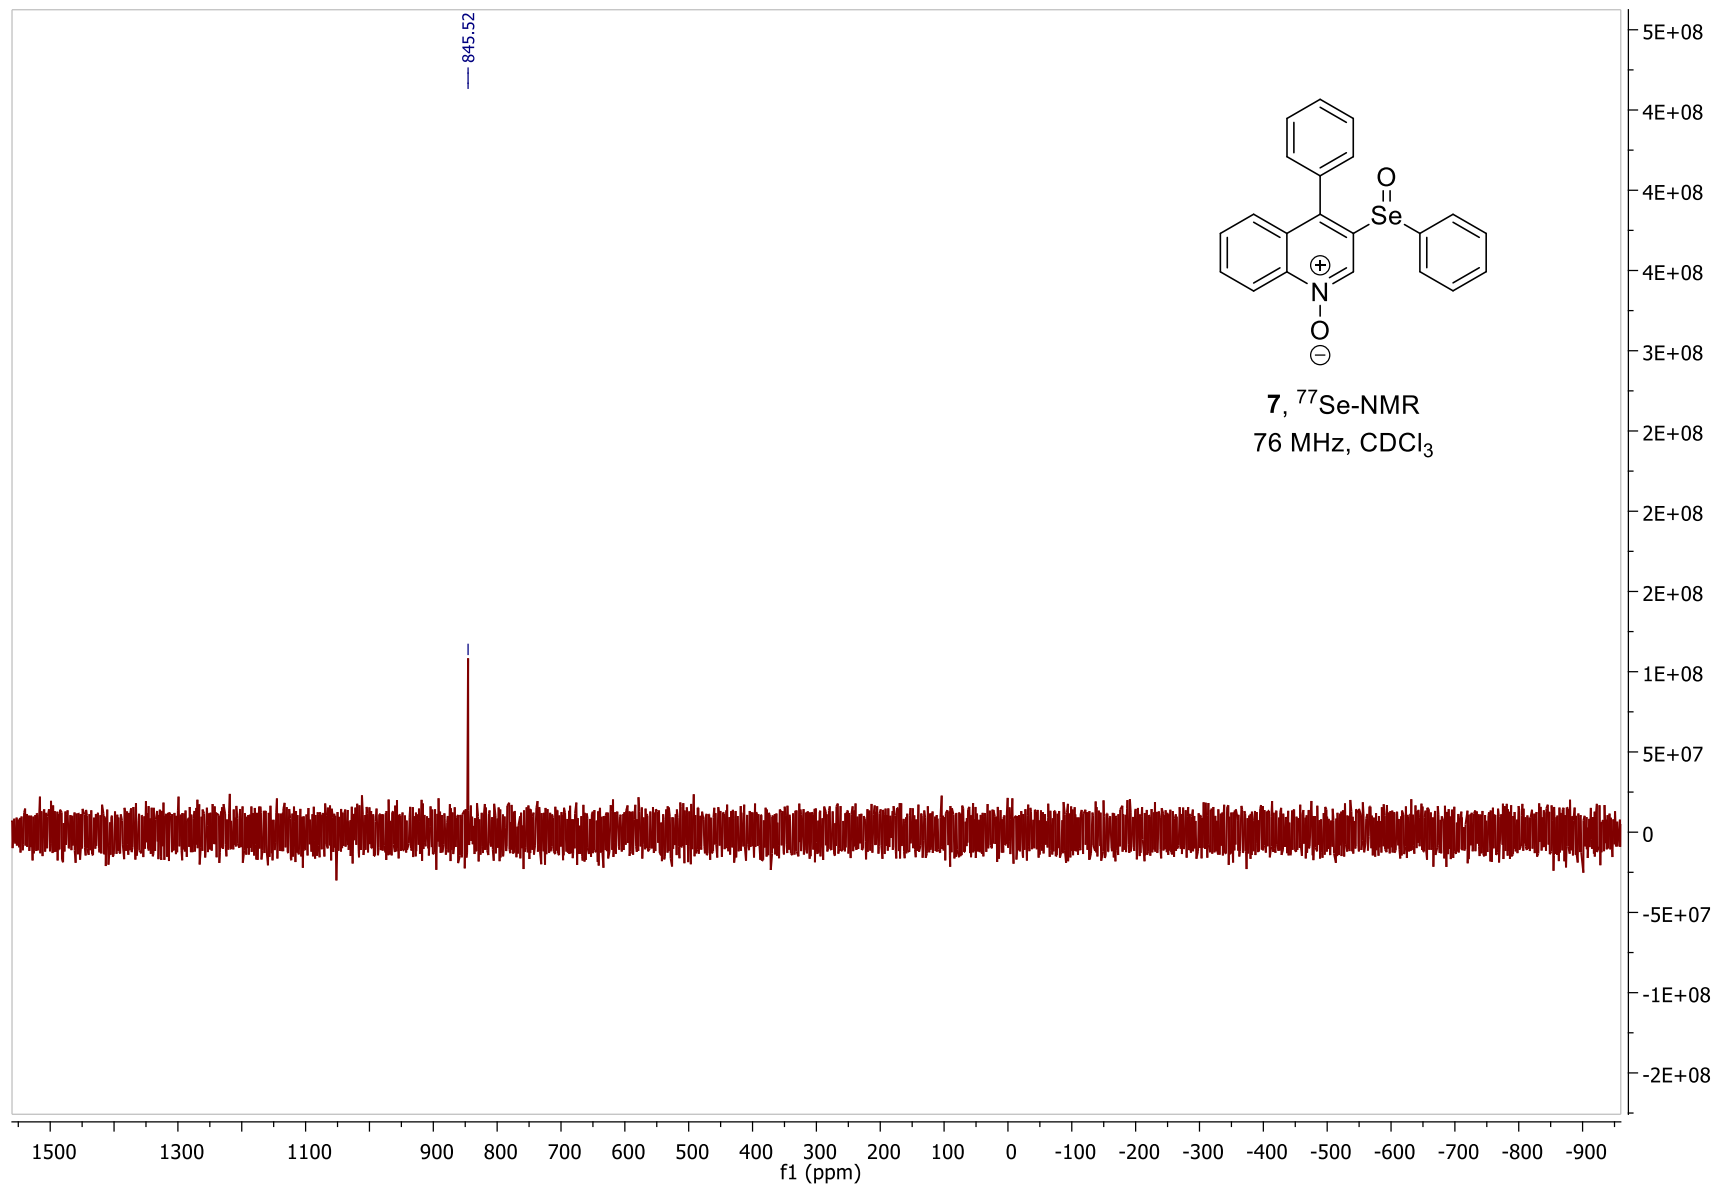

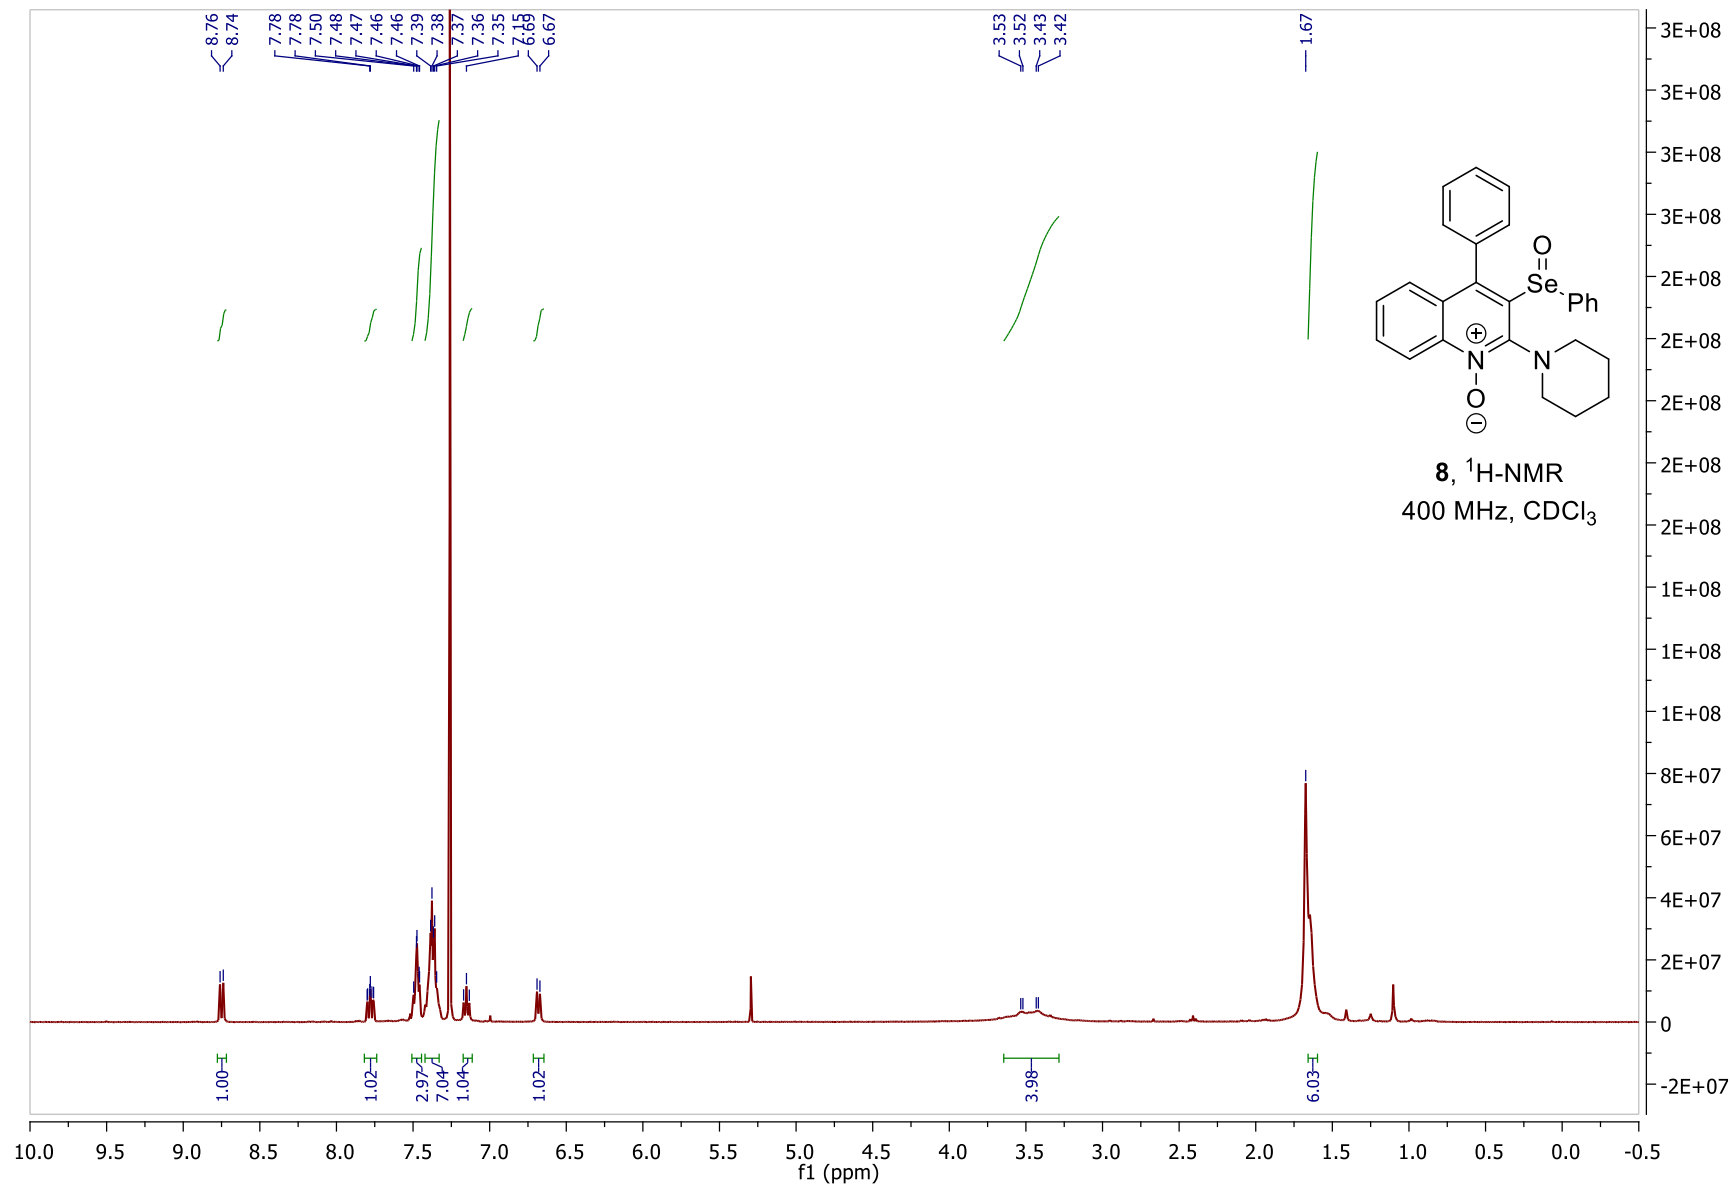

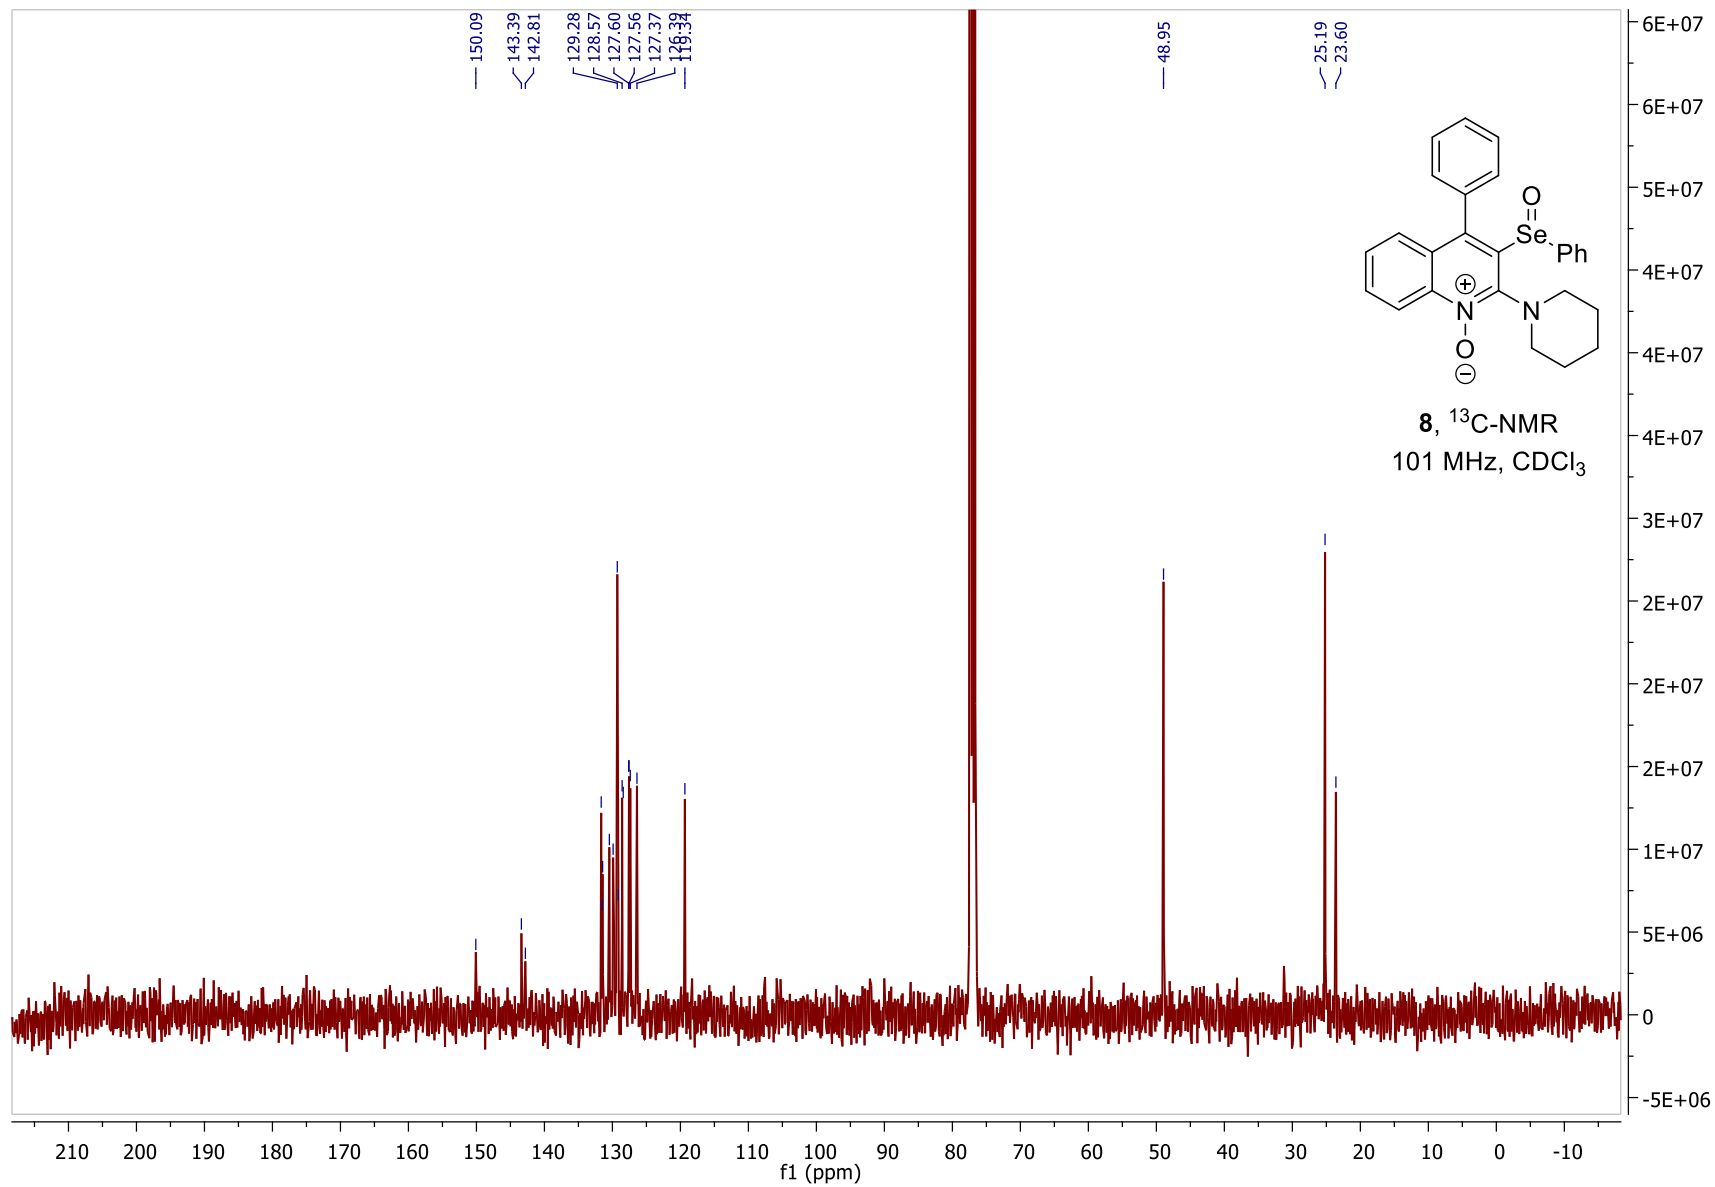

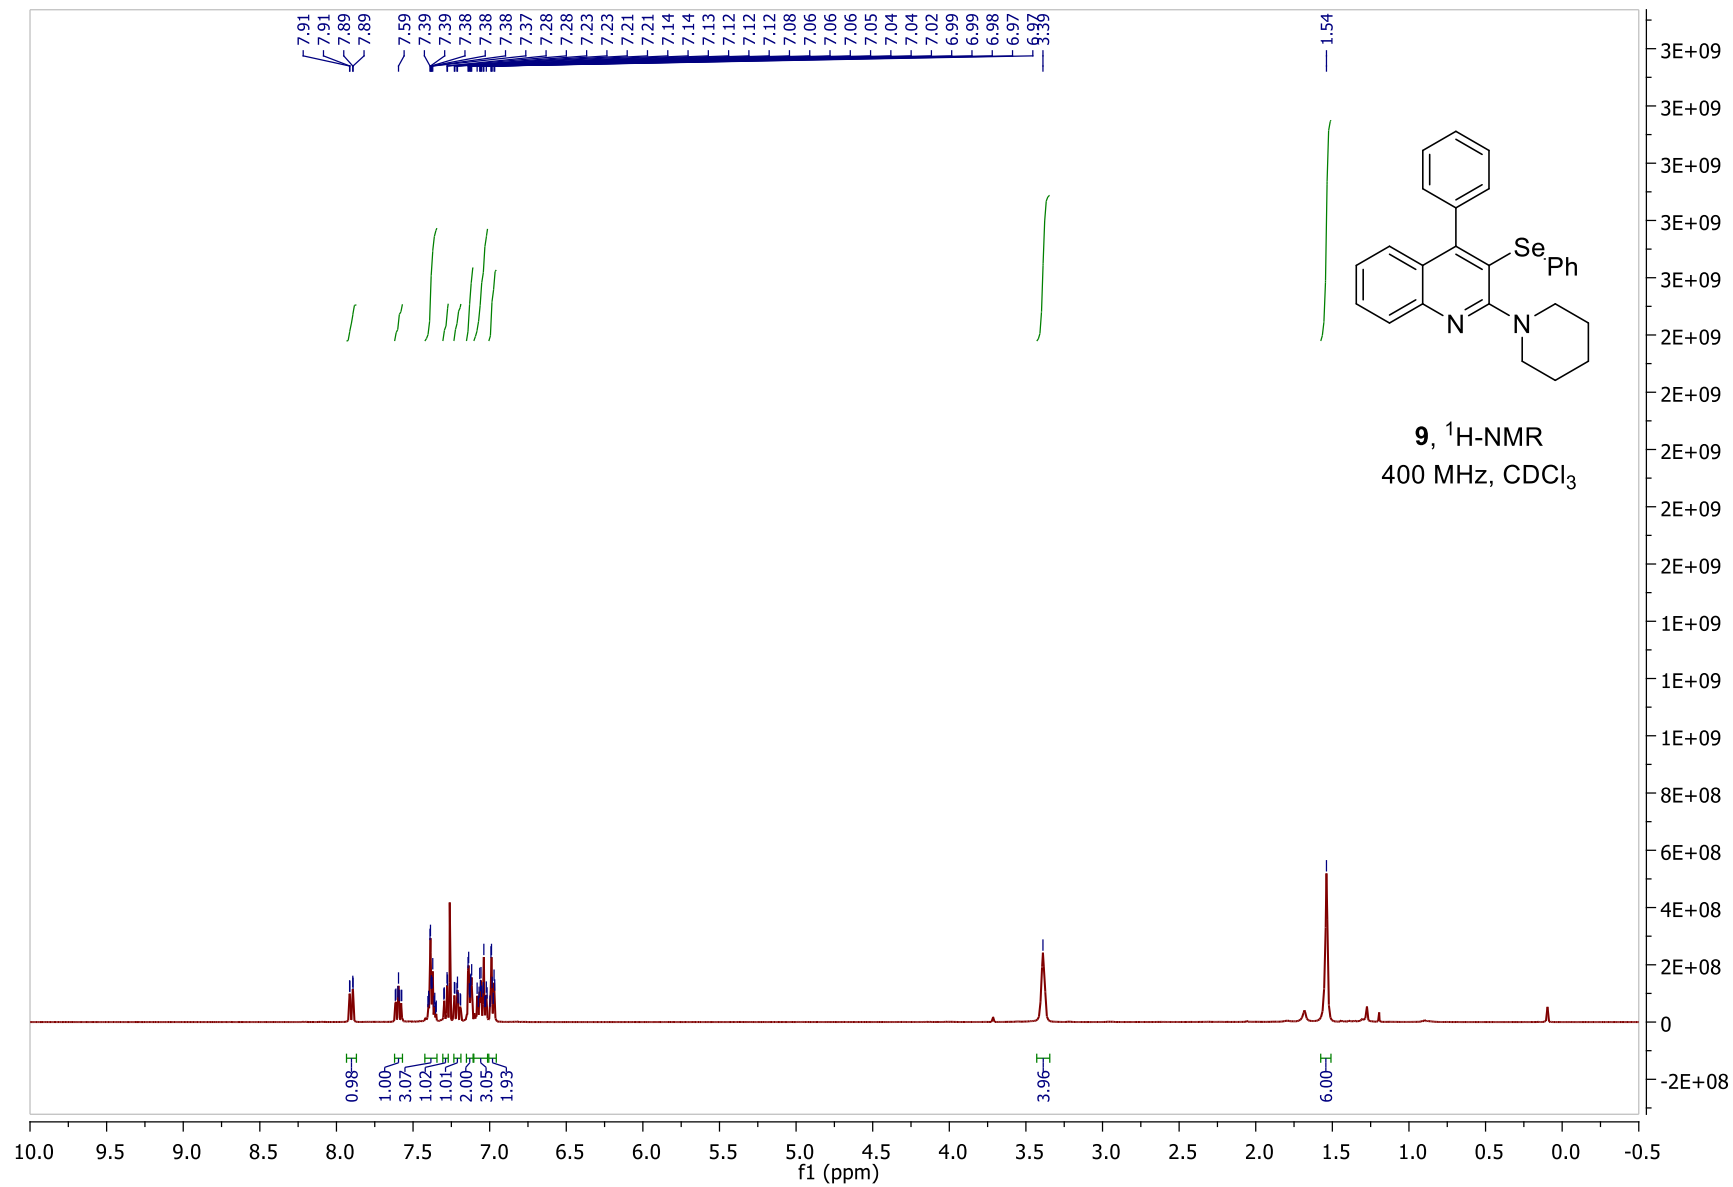

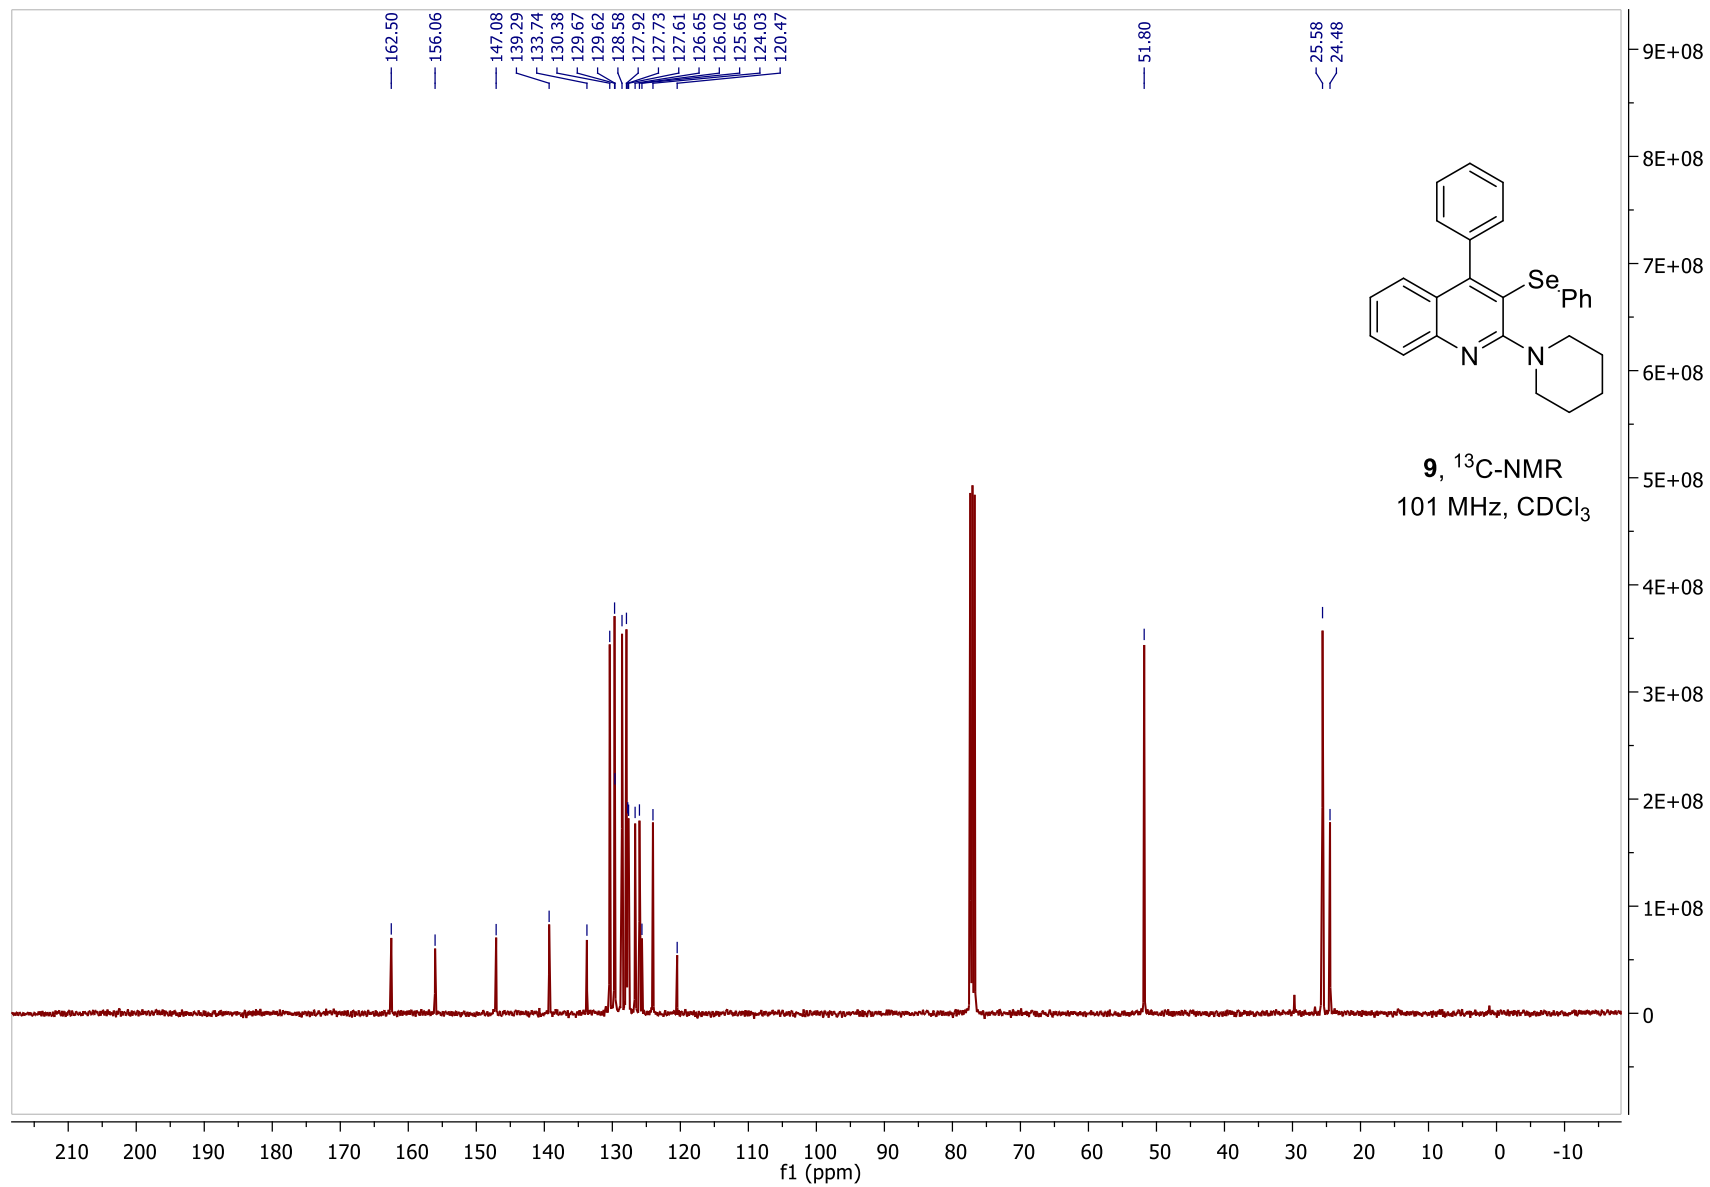

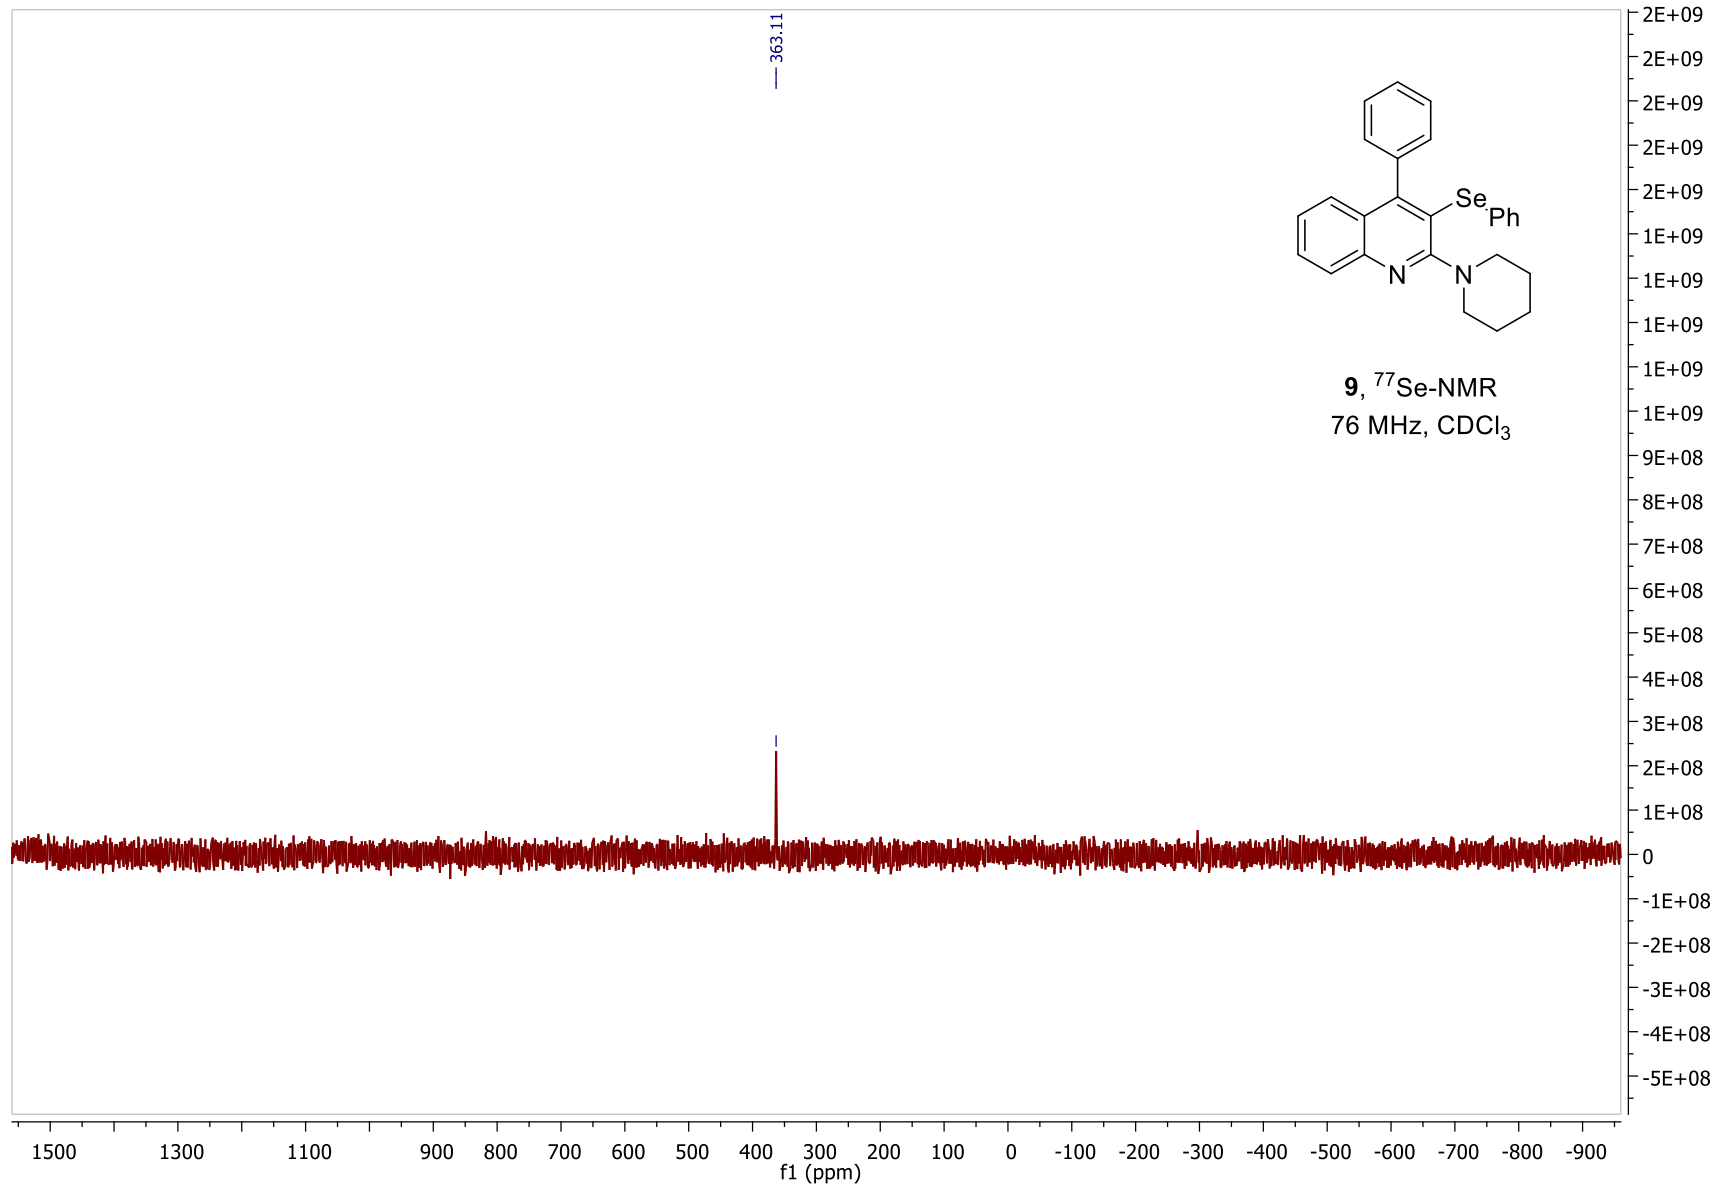

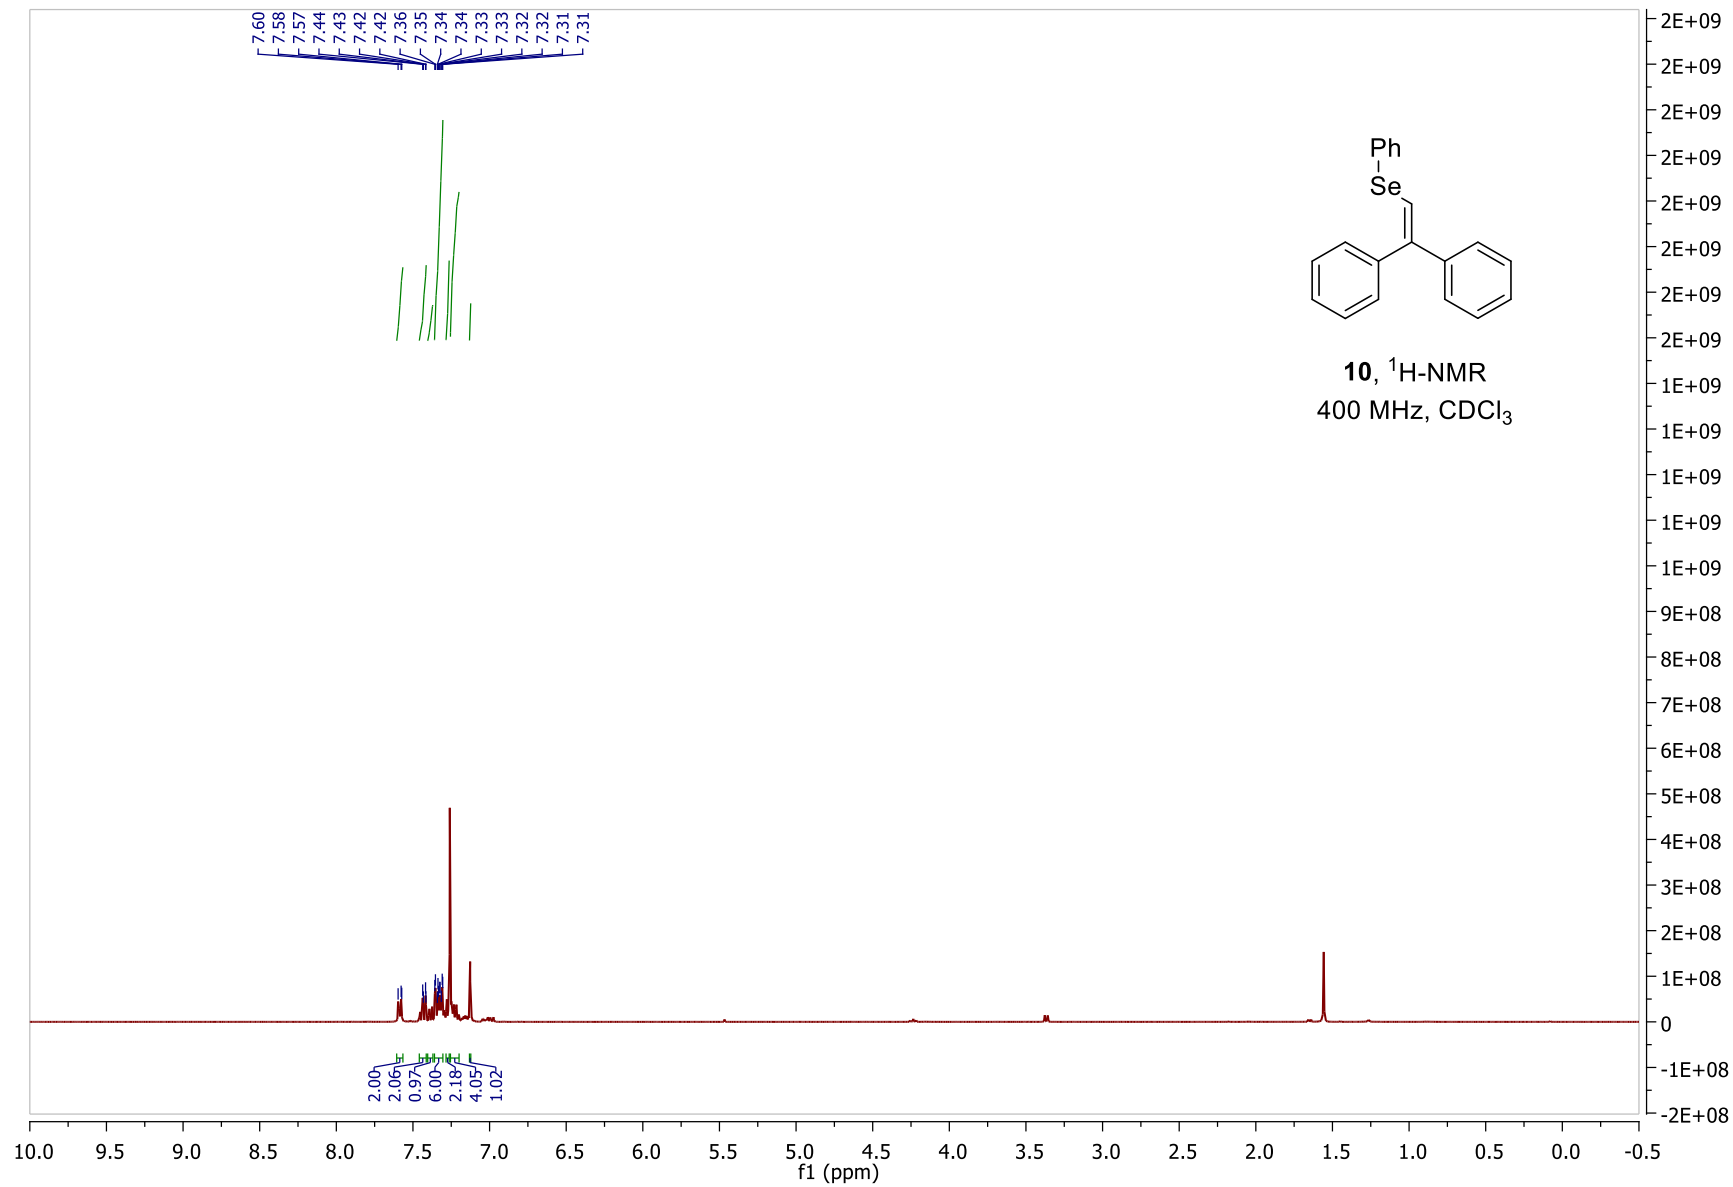

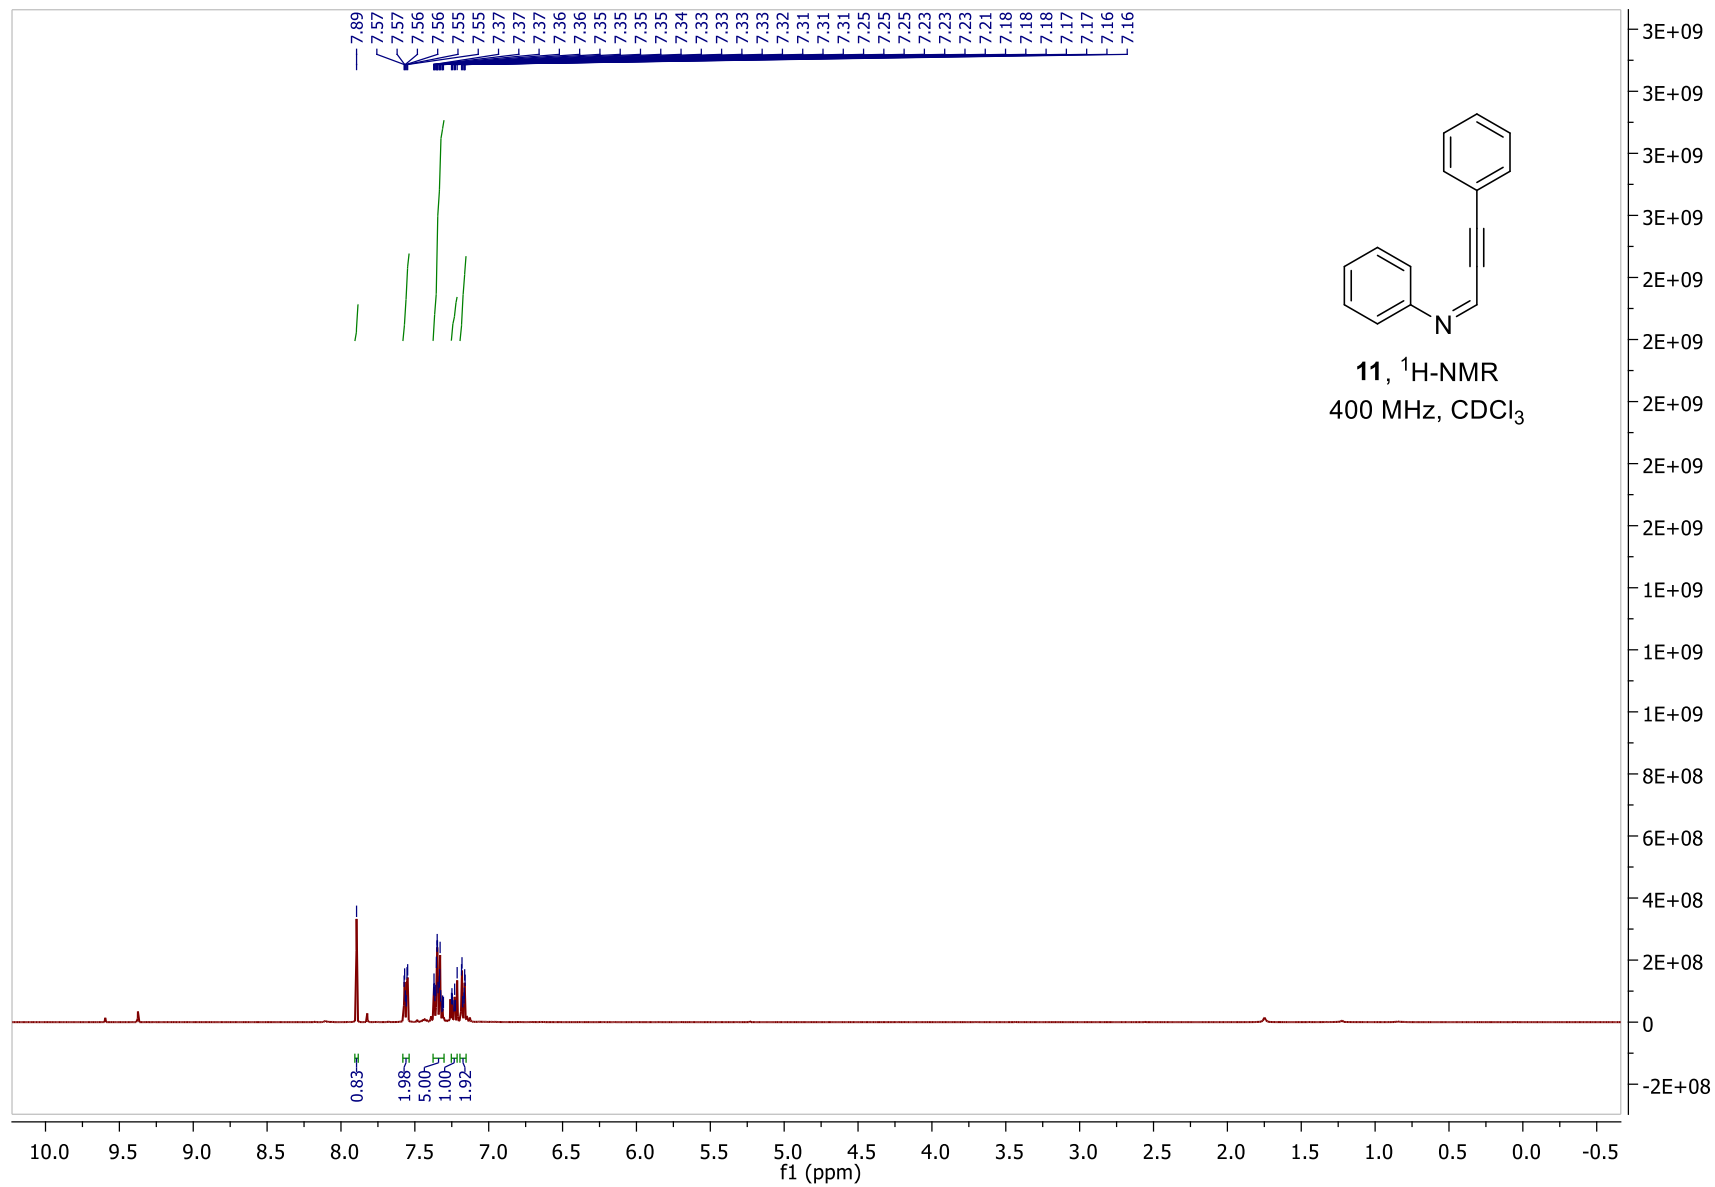



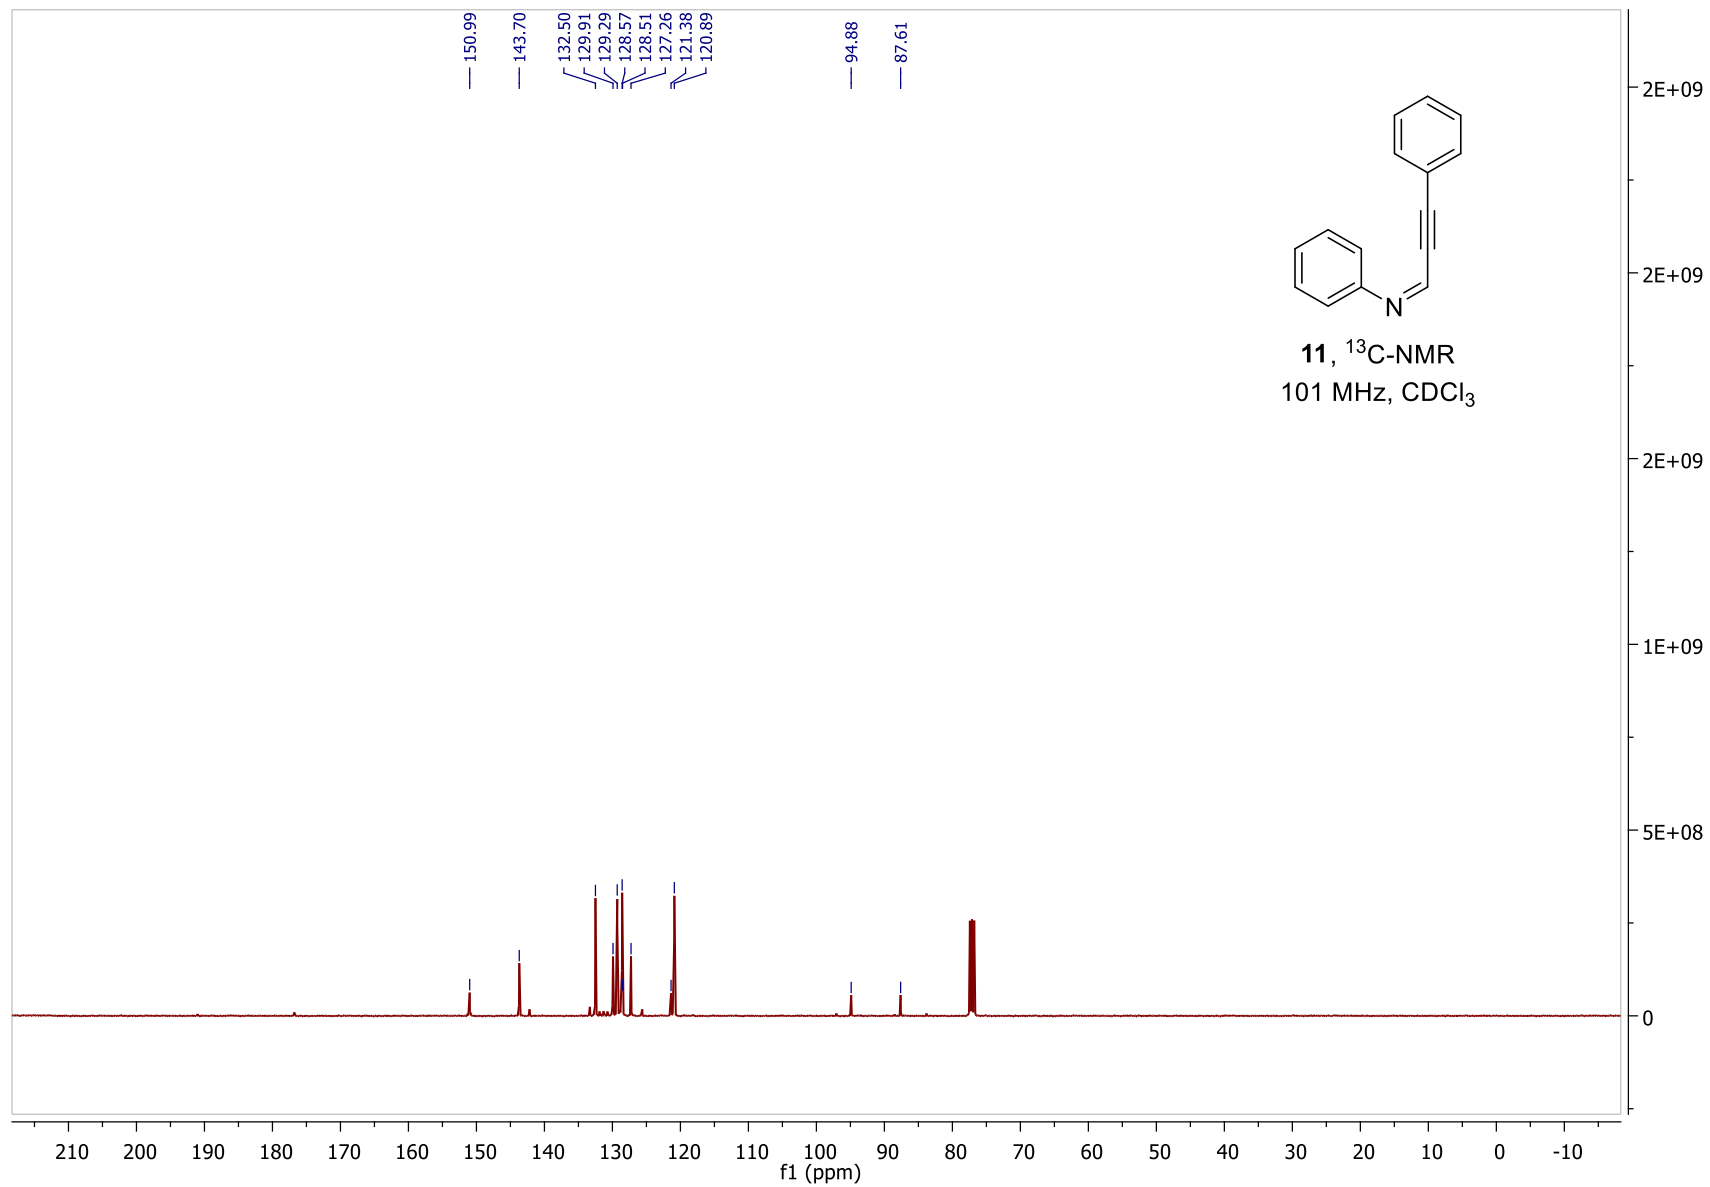

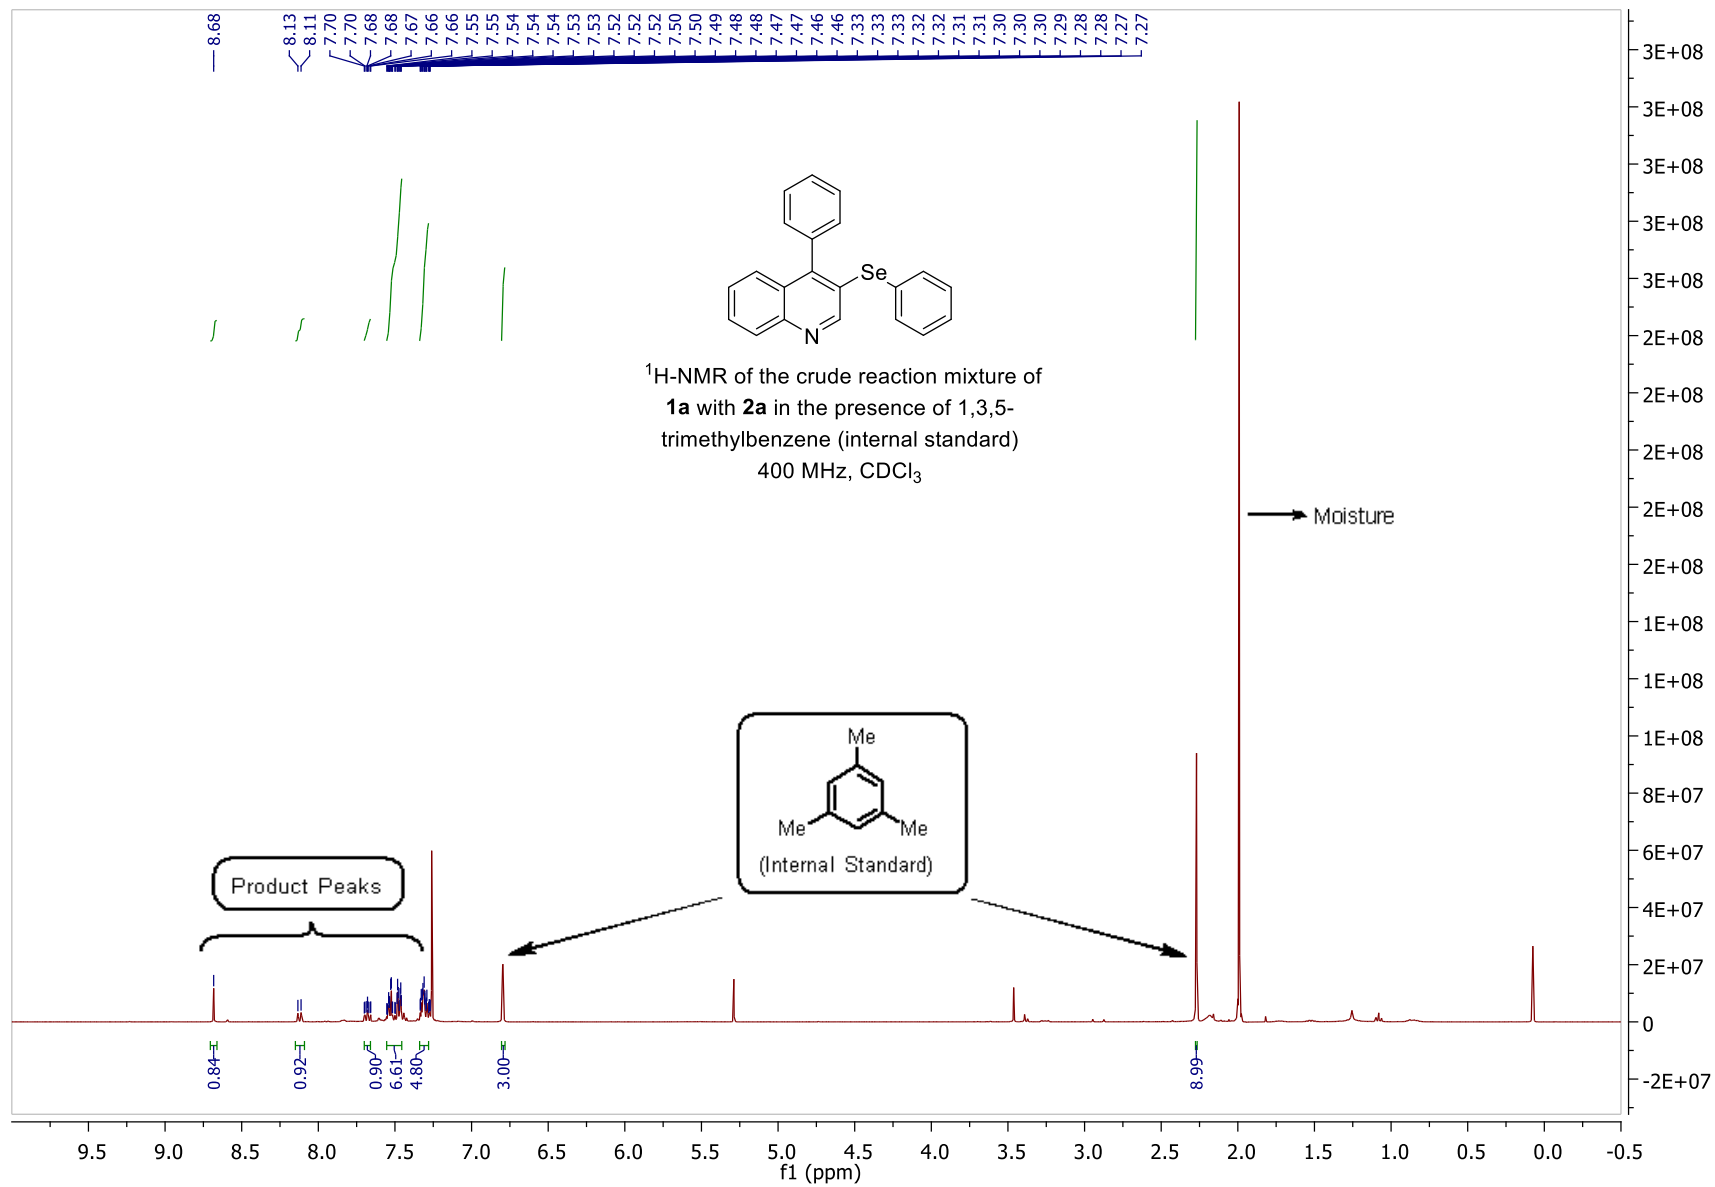

Supplement: d4cc01780c1.pdf [file d4cc01780c1.pdf]
